# Supplementary material for: Dynamic and regulated TAF gene expression during mouse embryonic germ cell development
Source: PubMed Central journal article supplement (PMC7010400; doi:10.1371/journal.pgen.1008515), 2020-01-08

**A**

| TFIID         | # of Replicates with Stra8-FLAG Promoter Peak Called | # of Replicates with Input Peaks Called |
|---------------|------------------------------------------------------|-----------------------------------------|
| <i>Taf1</i>   | 1                                                    | 0                                       |
| <i>Taf2</i>   | 0                                                    | 0                                       |
| <i>Taf3</i>   | 2                                                    | 0                                       |
| <i>Taf4a</i>  | 1                                                    | 0                                       |
| <i>Taf4b</i>  | 3                                                    | 0                                       |
| <i>Taf5</i>   | 0                                                    | 0                                       |
| <i>Taf6</i>   | 1                                                    | 0                                       |
| <i>Taf7</i>   | 0                                                    | 0                                       |
| <i>Taf7l</i>  | 3                                                    | 0                                       |
| <i>Taf7l2</i> | 3                                                    | 0                                       |
| <i>Taf8</i>   | 0                                                    | 0                                       |
| <i>Taf9</i>   | 2                                                    | 0                                       |
| <i>Taf9b</i>  | 0                                                    | 0                                       |
| <i>Taf10</i>  | 1                                                    | 0                                       |
| <i>Taf11</i>  | 2                                                    | 0                                       |
| <i>Taf12</i>  | 1                                                    | 0                                       |
| <i>Taf13</i>  | 0                                                    | 0                                       |
| <i>Tbp</i>    | 0                                                    | 0                                       |

**B**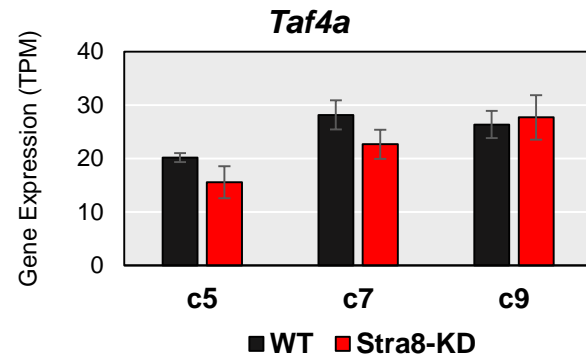**C**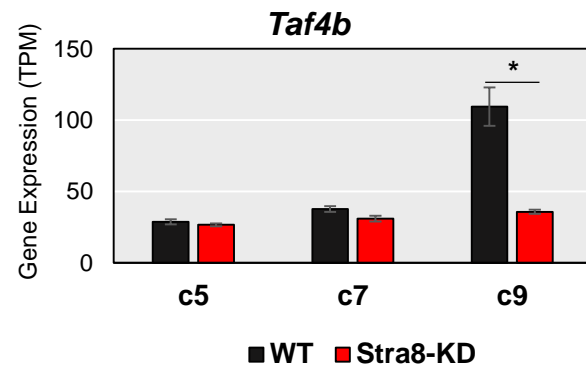**D**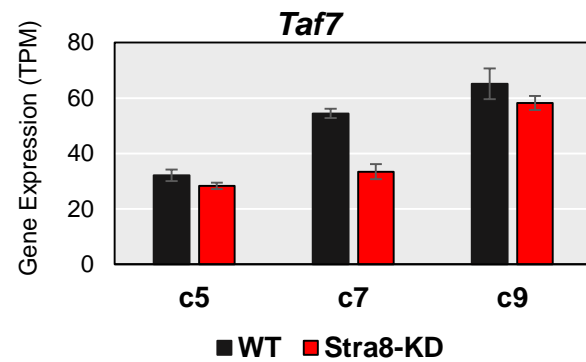**E**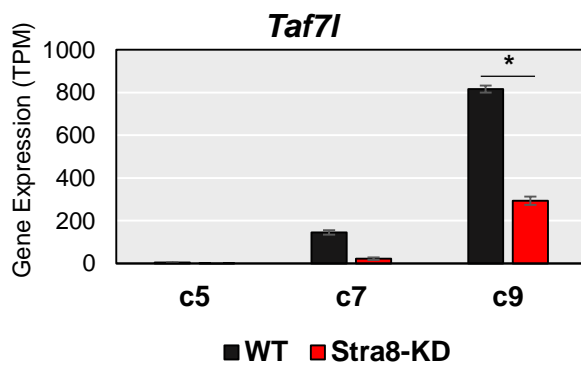**F**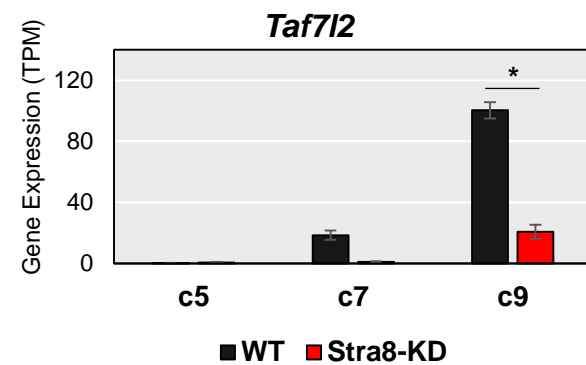

Supplement: pgen.1008515.s006.pdf [file pgen.1008515.s006.pdf]
