# Supplementary material for: Dynamic and regulated TAF gene expression during mouse embryonic germ cell development
Source: PubMed Central journal article supplement (PMC7010400; doi:10.1371/journal.pgen.1008515), 2020-01-08

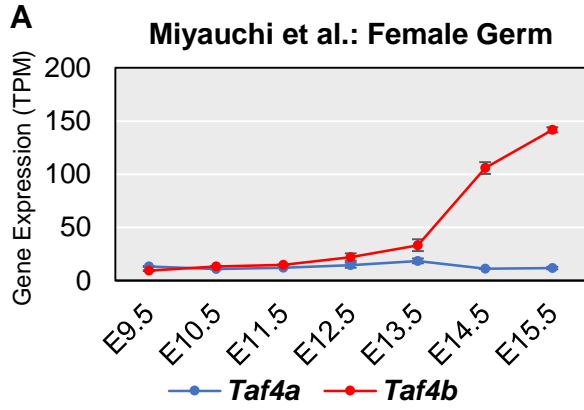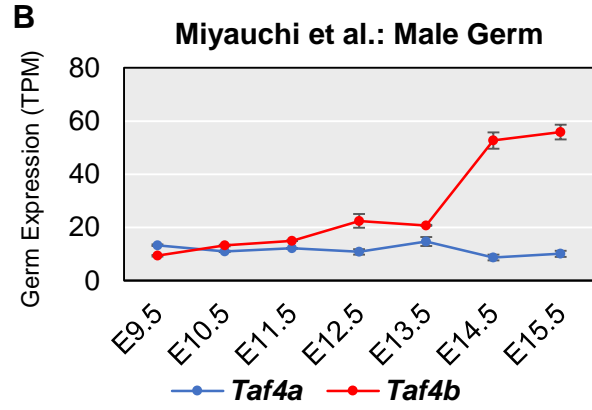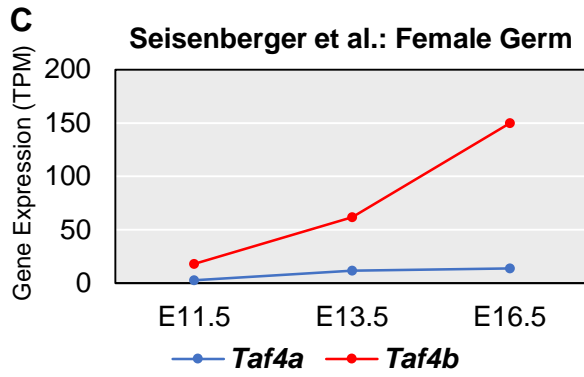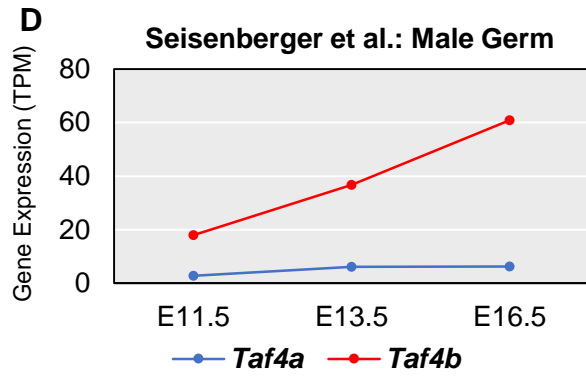

Supplement: pgen.1008515.s002.pdf [file pgen.1008515.s002.pdf]
