# Supplementary material for: Dynamic and regulated TAF gene expression during mouse embryonic germ cell development
Source: PLoS Genet. 2020 Jan 8;16(1):e1008515. doi: 10.1371/journal.pgen.1008515 (PMC7010400; doi:10.1371/journal.pgen.1008515)
Supplement: S8 Table — Sheet 2 (“All_TPMs”) contains a TPM values table for all samples and genes. Sheet 3 (“Quick_Calc”) contains search and plotting tools to quickly evaluate the data. Sheets 4 and 5 (‘DESeq_WT_DazlKO’ and ‘DESeq_WT_Stra8KO’) contain DESeq2 results for WT versus KO gene expression. S8 Table is associated with Fig 6, Fig 7, and Fig 8. (XLSX) [file pgen.1008515.s014.xlsx]

## Sheet: Description
Table S8 Description
Transcripts per million (TPM) of all re-processed RNA-seq data from Soh et al with quick and easy tabs for asking specific questions about the data
In the colored tab, simply enter gene names into the yellow highlighted boxes
DESeq2 output for comparisons between WT, Dazl-KO, and Stra8-KO E14.5 whole ovary
Tab Name	Description
All_TPMs	Full Table of all TPMs for all samples
Quick_Calc	Tab for comparing the expression of a gene between the germ cells and somatic cells of the embryonic female gonad
DESeq_WT_DazlKO	DESeq2 results for E14.5 WT vs Dazl-KO gene expression
DESeq_WT_Stra8KO	DESeq2 results for E14.5 WT vs Stra8-KO gene expression
Note: Taf7l2 is labeled "4933416C03Rik" in this file

## Sheet: All_TPMs
dataMerge[, 1]	TPM_Dazl_KO_1	TPM_Dazl_KO_2	TPM_Dazl_KO_3	TPM_Dazl_WT_1	TPM_Dazl_WT_2	TPM_Dazl_WT_3	TPM_Stra8_KO_1	TPM_Stra8_KO_2	TPM_Stra8_KO_3	TPM_Stra8_WT_2	TPM_Stra8_WT_3
0610005C13Rik	0.385149	0.099448	0.187415	0	0.134593	0.262915	0	0.484549	0.76841	0.336307	0.288229
0610007P14Rik	66.0481	73.8108	63.4459	55.9829	62.296	54.6714	54.5693	54.2518	63.9235	54.0981	63.8037
0610009B22Rik	28.6011	40.3938	32.2706	34.7639	31.2193	35.0704	34.2817	29.0418	36.8822	24.7013	29.8283
0610009L18Rik	5.84398	6.52994	4.34108	5.97918	8.16661	8.31805	10.0271	6.55188	6.56343	4.62003	7.47116
0610009O20Rik	21.5423	20.2314	21.0624	23.7796	21.7775	17.3203	18.964	18.4565	24.4304	18.6131	17.9918
0610010B08Rik	0	0.138362	0	0	0	0	0	0	0	0	0
0610010F05Rik	4.51527	5.34868	5.35112	6.52162	7.38353	8.93394	5.95817	6.66526	5.9825	8.90629	7.88226
0610010K14Rik	121.016	98.437	113.875	88.3915	101.848	98.9086	85.6399	83.7775	91.2374	83.632	93.895
0610011F06Rik	38.593	39.6984	36.0956	49.5199	53.5391	47.8348	50.3521	39.9573	47.5324	42.4648	47.566
0610012G03Rik	38.1418	35.5873	37.1031	38.9377	35.7765	32.6563	37.777	33.7286	39.781	30.1763	34.9658
0610030E20Rik	7.99667	7.64239	8.68014	8.03321	7.75752	8.40673	8.39976	9.40688	8.66234	8.84902	8.27876
0610031O16Rik	0	0	0	0	0	0	0	0	0	0	0
0610037L13Rik	30.4629	35.0094	32.6554	33.0049	34.2273	33.5093	33.3269	31.0036	30.6329	31.007	32.8224
0610038B21Rik	1.98942	0.909391	1.64143	2.40187	0.866493	1.74677	1.51696	2.29617	1.59088	1.26691	1.38471
0610039H22Rik	0	0.074515	0	0	0.052372	0.127468	0.054416	0.083206	0	0.086548	0
0610039K10Rik	1.33679	2.15661	1.83183	2.88196	2.93193	2.15404	2.36391	3.59508	2.01054	4.75865	2.2168
0610040B10Rik	4.88729	6.08308	4.68997	6.84343	7.70299	7.99563	5.49807	6.93093	7.19621	3.55647	7.66751
0610040F04Rik	0.068886	0.213484	0.28662	0	0.044019	0	0	0.055801	0	0	0.181314
0610040J01Rik	0.127973	0.208842	0.288397	0.362234	0.365446	0.204145	0.169939	0.217372	0.343687	0.101357	0.227416
0610043K17Rik	0	0	0	0	0.371178	0	0.128555	0	0	0	0
1010001N08Rik	10.4566	14.3639	9.62908	16.4427	12.4613	17.5635	20.6146	22.9552	13.4399	9.63545	11.1626
1110001J03Rik	46.2309	41.1345	43.2172	27.3858	52.9603	41.5133	40.4214	34.8638	50.0578	37.6818	49.2691
1110002L01Rik	0.672919	0.841847	2.58975	3.55117	2.61838	2.6193	5.18078	5.09498	2.83314	6.22485	3.58051
1110004E09Rik	34.6965	29.6794	34.511	26.9629	28.6414	25.0247	28.5125	24.9793	25.9136	21.5032	27.7455
1110004F10Rik	99.7783	101.462	90.9338	102.251	104.37	105.152	96.0547	84.8457	100.687	85.5104	104.016
1110006O24Rik	4.25728	4.26057	3.09269	4.98007	5.45841	3.46397	4.05509	3.89889	4.4275	4.09677	4.04888
1110007C09Rik	11.2006	16.8933	13.3967	20.3639	20.8382	16.5253	17.2314	10.5882	14.2451	13.3627	18.289
1110008F13Rik	117.885	112.362	119.699	107.279	106.652	93.2836	103.058	97.9982	103.11	94.2236	106.199
1110008L16Rik	12.7882	12.8054	12.5764	9.59756	10.4602	7.51402	10.8292	10.4609	10.7358	9.2814	10.3326
1110008P14Rik	30.4102	26.8721	24.3333	24.035	23.7607	20.5856	27.5917	22.0405	25.1323	19.0884	25.996
1110012L19Rik	28.189	24.1748	29.3696	25.5954	29.2933	22.8318	28.6406	25.2696	27.4058	22.3413	25.4344
1110015O18Rik	0	0	0	0	0	0	0	0	0	0	0
1110017D15Rik	0	0	0.18571	0	0	0	0	0	0	0	0
1110019D14Rik	3.29347	4.3491	4.3221	4.85526	5.76489	8.52601	3.90942	4.44295	3.86347	5.49864	5.07915
1110020A21Rik	0.561106	1.01051	0.807838	0.969473	0.815941	1.28248	0.88481	1.29991	0.87925	0.555503	1.34446
1110025L11Rik	0	0	0	0	0	0	0	0	0	0	0
1110028F11Rik	0	0.040104	0	0.071933	0.084802	0	0.073426	0.095552	0.071457	0	0.087585
1110028F18Rik	0	0	0	0	0	0	0	0	0	0	0
1110032A03Rik	10.1019	11.8734	11.1136	14.0621	14.0085	13.0263	12.1172	13.6138	15.5545	12.4089	13.2545
1110032F04Rik	0.94975	0.989537	1.16495	1.2265	0.978027	1.0398	1.14101	1.10034	1.52391	1.00295	1.01273
1110034G24Rik	10.947	11.0481	9.53648	11.052	10.5769	9.85273	10.0958	8.55152	11.6168	6.94295	9.95742
1110036E04Rik	0	0	0	0	0	0	0	0	0	0	0
1110037F02Rik	13.8271	14.6641	14.5978	15.7454	14.8702	15.5792	15.581	15.9717	14.1191	16.2804	15.1849
1110038B12Rik	103.024	102.425	101.604	105.869	105.933	84.9855	94.6366	78.7995	108.221	54.8833	99.7644
1110038F14Rik	36.0922	37.8275	35.0663	40.3933	38.8888	38.3055	37.3621	30.7604	48.2869	33.4602	37.3695
1110046J04Rik	1.94509	2.18978	3.14509	4.39089	3.06032	2.50746	4.73146	2.41188	4.21223	3.72435	1.70191
1110051M20Rik	11.9898	12.5272	12.4441	15.8187	16.0986	14.9019	17.4851	14.6023	16.4218	13.2359	14.6387
1110058D11Rik	0	0	0	0	0	0	0	0	0	0.175028	0
1110059E24Rik	26.5697	31.3573	30.8039	27.2024	26.8264	25.5382	27.3693	24.6067	30.658	22.797	28.4635
1110059G10Rik	6.19838	7.18644	6.61691	7.6638	6.98431	8.11122	6.91642	6.69547	6.62354	6.15032	7.68237
1110065P20Rik	85.1928	88.5748	78.8155	97.8986	102.7	82.3792	100.174	84.5894	109.491	84.1405	86.799
1190002F15Rik	17.2645	11.6982	17.0929	19.491	19.5885	17.2734	18.4093	18.539	23.738	6.98878	17.5327
1190002N15Rik	37.9025	42.1692	35.604	49.0244	45.2973	46.6075	46.7221	46.7705	43.2092	46.9537	43.8667
1190003K10Rik	0	0	0	0	0	0	0	0	0	0	0
1190005I06Rik	0	0	0	0	4.62656	0	0	0	0.765847	0	0
1190007I07Rik	31.9838	27.6666	30.0874	24.8836	25.341	24.2495	24.9951	22.3269	22.4753	20.8504	23.8266
1200014J11Rik	13.8005	12.9872	13.8319	12.9934	14.4853	13.1255	11.7861	14.0555	10.9624	14.2855	14.6256
1300002E11Rik	13.3256	12.9785	14.1007	8.55236	10.2857	10.5019	10.64	11.3634	11.186	10.1445	13.137
1300017J02Rik	0	0	0	0	0	0	0.102656	0.625021	0.785911	0.145304	0.436865
1500004A13Rik	4.66174	5.61359	4.72729	5.66611	5.305	6.47396	5.21836	4.85604	5.49636	6.65819	6.19311
1500009C09Rik	0.1089	0.069198	0.086148	0.062686	0	0	0	0.166538	0	0.081416	0
1500009L16Rik	25.9058	25.4597	34.6127	8.72407	6.02276	7.9924	6.12066	8.45316	6.86988	6.4371	8.92832
1500011B03Rik	16.82	20.5075	20.5836	17.5942	19.3431	16.6677	20.7576	18.5941	19.7343	19.5074	18.3924
1500011K16Rik	15.391	15.4685	13.8582	20.7625	20.3602	17.8122	22.4576	16.4641	22.7751	15.1044	16.5389
1500012F01Rik	97.0521	115.715	90.2284	96.0553	104.454	95.0868	95.2718	79.8561	105.354	70.2269	83.4694
1500012K07Rik	0	0	0	0	0	0	0	0	0	0	0
1500015A07Rik	5.37536	6.8137	6.17832	6.81131	5.83673	5.6327	6.75925	6.42216	6.38083	5.44259	6.04749
1500015L24Rik	0	0	0	0	0	0	0	0	0	0	0
1500015O10Rik	0.269495	0.939267	0.354272	1.20516	0.947171	1.16667	1.18879	0.7282	2.39438	0.569181	1.43138
1500017E21Rik	0	0	0	0	0	0	0	0	0	0	0
1500026H17Rik	0.098563	0.055148	0.443496	0.798591	0.725312	0.764291	0.769016	0.633666	0.712603	0.066615	0.342535
1600002D24Rik	0.096809	0	0	0	0.082484	0.102954	0.063742	0	0.069504	0	0.076672
1600002H07Rik	13.297	13.4033	13.8231	11.2627	11.0328	11.7462	12.7024	9.80637	11.0062	10.1822	12.719
1600002K03Rik	14.6445	12.1522	13.7314	13.218	16.6197	17.3489	14.6217	9.81099	14.049	10.9423	15.2923
1600010M07Rik	0	0.177615	0	0	0	0	0	0	0	0	0
1600012H06Rik	30.9407	34.2275	32.62	33.8301	32.8717	33.6972	34.9125	33.6663	33.5292	30.8893	34.8749
1600014C10Rik	10.5078	8.93705	10.0383	11.5006	10.1423	10.3174	11.2999	9.38962	9.29382	10.0712	9.18153
1600014C23Rik	0	0.383137	0	0	0	0	0	0	0	0	0
1600014K23Rik	0.854685	0.531339	1.22922	0.231641	0.180916	0.908932	0.141869	0	0	0.376066	0.112818
1600015I10Rik	0	0	0	0	0	0	0	0	0	0	0
1600019K03Rik	0	0	0	0	0	0	0	0	0	0	0
1600020E01Rik	31.0139	30.2249	37.1484	30.9545	36.4397	34.3811	26.8635	23.2851	40.4346	24.8517	35.0914
1600023N17Rik	1.59511	2.03265	1.91605	1.97861	2.15999	1.89361	1.49356	0.870532	1.6619	1.93831	1.31621
1600025M17Rik	0	0	0	0	0	0	0	0	0	0	0
1600027J07Rik	0	0	0	0	0	0	0	0	0	0	0
1600029I14Rik	0	0	0	0	0	0.110461	0	0	0	0	0
1600029O15Rik	1.03153	1.07896	1.12106	1.02735	0	0.895685	1.07576	0	1.24854	0.899316	1.02127
1700001C02Rik	0	0	0	0	0	0	0	0	0	0	0
1700001C19Rik	0	0.103189	0	0	0	0	0.073471	0.063741	0	0	0.063611
1700001D01Rik	0	0	0	0	0	0	0	0	0	0	0
1700001F09Rik	0	0	0	0	0	0	0	0	0	0	0
1700001G01Rik	0	0	0	0	0	0	0	0	0	0	0
1700001G11Rik	0.424207	0.981958	1.48231	0.411717	1.11949	1.76709	0.809795	2.058	0.748025	1.23415	0
1700001G17Rik	0.942171	1.4434	1.05278	1.98081	2.2771	2.26115	2.13362	1.55691	1.73216	1.27389	1.21657
1700001J03Rik	0	0	0	0	0	0	0	0	0	0	0.243617
1700001J11Rik	0.276756	0.318174	0.243406	0.272082	0.189504	0.251235	0.466497	0.325528	0.215378	0.404896	0.349265
1700001K19Rik	0.123918	0.165775	0.234367	0.203961	0	0	0	0	0.270149	0.121058	0.149004
1700001K23Rik	0	0	0	0	0	0	0	0	0.247373	0	0
1700001L05Rik	5.28758	5.19751	5.74009	8.31002	8.78972	12.6406	3.21754	4.00981	3.10527	12.0589	9.11141
1700001L19Rik	0.429352	0.400379	0.770576	0.803795	0.730102	0.839906	0.500712	0.485341	0.494374	0.553681	0.703676
1700001O22Rik	0.083095	0.154974	0.373736	0.762756	1.10599	1.15768	0.894308	0.356499	0.399336	0.795359	0.534162
1700001P01Rik	0.372135	0	0	0	0.265978	0	0	0	0	0	0.30374
1700003C15Rik	0	0	0	0	0	0	0	0	0	0	0
1700003D09Rik	0	0	0	0	0	0	0	0	0	0	0
1700003E16Rik	0.343394	0.214119	0.331028	0.531632	0.31827	0.462807	0.283247	0.14603	0.188577	0.149564	0.16122
1700003E24Rik	0	0	0	0	0	0	0	0	0	0	0
1700003F12Rik	2.96495	1.45227	2.15973	2.53181	2.36359	2.61454	5.15322	2.51141	1.48953	3.36198	2.75234
1700003G13Rik	0	0	0	0	0	0	0	0	0	0	0
1700003G18Rik	0	0	0	0	0	0.223202	0	0.250129	0	0.188707	0
1700003H04Rik	0	0	0	0	0	0	0	0	0	0	0
1700003I22Rik	0	0	0	0	0	0	0	0	0	0	0
1700003L19Rik	0	0	0	0	0	0	0	0	0	0	0
1700003M02Rik	0	0	0	0	0.035237	0	0	0	0	0	0
1700003M07Rik	0.356444	0.690352	0.410389	0.377877	0.350424	0.240563	0.181595	0.189526	0.383128	0.19996	0.173724
1700003P14Rik	0	0	0	0	0	0	0	0	0	0	0
1700006A11Rik	0	0	0	0	0	0	0	0	0	0	0
1700006E09Rik	0	0	0	0	0	0	0	0	0	0	0
1700006F04Rik	0	0	0	0	0	0	0	0	0	0	0
1700006H21Rik	0	0	0	0	0	0	0	0	0	0	0
1700007B14Rik	0.110741	0.129086	0.350427	0.089478	0.24768	0	0.08469	0.06784	0.381943	0	0
1700007F19Rik	0	0	0	0	0	0	0.047174	0	0	0	0
1700007G11Rik	0	0	0	0.14567	0	0	0	0	0	0	0
1700007J10Rik	0	0	0	0	0	0	0	0	0	0	0
1700007K09Rik	0.34153	0.247592	0	0	0	0	0	0	0	0	0
1700007K13Rik	9.1832	10.3775	13.8445	3.35887	3.22151	3.04512	3.29579	5.25293	4.39153	3.16109	3.56385
1700007L15Rik	4.98365	5.02078	2.8767	5.87234	6.3497	8.53527	4.33435	3.98427	5.36118	7.70367	7.18126
1700007P06Rik	0	0	0	0	0	0	0	0	0	0	0
1700008C04Rik	0	0	0	0	0	0	0	0	0	0	0
1700008J07Rik	3.69189	4.1149	3.8003	5.26901	5.31614	5.16843	5.30842	4.77898	4.67863	5.69768	5.12655
1700008K24Rik	0	0	0	0	0	0	0	0	0	0	0
1700008O03Rik	0	0.443639	0.536505	0.770517	0.630445	1.28819	1.15751	0.340462	0.747829	0.948265	1.03753
1700008P02Rik	0	0	0	0	0	0	0	0	0	0	0
1700009C05Rik	0	0	0	0	0	0	0	0	0	0	0
1700009J07Rik	0	0	0	0	0	0	0	0	0	0	0
1700009N14Rik	0	0	0	0	0	0	0	0	0.102108	0	0.112639
1700010B08Rik	0	0	0	0	0	0.159774	0	0.115388	0.287636	0	0
1700010D01Rik	0	0	0	0	0	0	0	0	0	0	0
1700010I02Rik	0	0	0	0	0	0	0	0	0	0	0
1700010I14Rik	0.932015	0.941253	0.823339	1.37844	1.11596	0.961345	1.43463	1.59617	1.38373	1.1091	1.00392
1700010J16Rik	0	0	0	0	0	0	0	0	0	0	0
1700010K23Rik	0	0	0	0	0	0	0	0	0	0	0
1700011A15Rik	0.530036	0.247134	0	0.377092	0.169352	0	0	0	0.285406	0	0.314841
1700011B04Rik	0	0	0	0	0	0	0	0	0	0	0
1700011C11Rik	0	0	0	0	0	0	0	0	0	0	0
1700011E24Rik	0	0	0	0	0	0	0	0	0	0	0
1700011H14Rik	0	0	0	0	0	0	0	0	0	0	0
1700011I03Rik	0	0	0	0	0	0	0	0	0	0	0
1700011L22Rik	0	0	0	0	0	0	0	0	0	0	0
1700011M02Rik	0	0	0	0	0	0	0	0	0	0	0
1700012A03Rik	0	0	0	0	0	0	0	0	0	0	0
1700012B07Rik	0	0	0	0	0	0	0	0	0	0	0
1700012B09Rik	0	0	0	0	0	0	0	0	0	0	0
1700012C14Rik	2.04232	1.56841	2.16362	1.81959	2.3741	1.43013	1.4298	2.04079	1.90049	1.26549	1.8078
1700012D01Rik	0.824202	1.29092	1.29329	1.25811	1.02907	1.02132	1.46937	1.71184	1.454	2.32272	2.00951
1700012D14Rik	0.285348	0	0.942067	1.04791	1.01308	1.07595	0.698269	1.17092	0.866504	1.64012	1.14451
1700012D16Rik	0	0	0	0	0	0	0	0.089281	0	0	0
1700012H19Rik	0	0	0	0	0	0	0	0	0	0	0
1700012I11Rik	0	0	0	0	0	0	0	0	0	0	0
1700012L04Rik	0.037986	0.035423	0.171208	0.169871	0.031313	0.13634	0.015133	0.087387	0	0	0.018051
1700012P22Rik	0	0	0	0	0	0	0	0	0	0	0
1700013D24Rik	0	0	0	0	0	0	0	0	0	0	0
1700013F07Rik	0	0	0	0	0	0	0	0	0	0	0
1700013G24Rik	0	0	0	0	0	0	0	0	0	0	0
1700013H16Rik	13.243	6.03596	21.0928	58.5486	67.488	87.6348	33.2108	21.5459	29.7826	61.879	64.1787
1700015E13Rik	0	0	0	0	0	0	0	0.410924	0	0.577953	0
1700015F17Rik	0	0	0	0	0	0	0	0	0	0	0
1700015G11Rik	0	0	0	0	0	0	0	0	0	0	0
1700016C15Rik	0	0	0	0	0	0	0	0	0	0	0
1700016D06Rik	0	0.06856	0	0	0	0.188911	0	0	0	0.152919	0.071496
1700016G22Rik	0	0	0.449558	0	0	0	0.334935	0.174345	0	0	0
1700016H13Rik	0	0	0	0	0	0	0	0	0	0	0
1700016K19Rik	0.519677	0.532876	0.432703	1.00353	1.0196	0.670966	1.33381	0.784383	0.764281	0.888349	1.02896
1700016L04Rik	0	0	0	0	0	0	0	0	0	0	0
1700016L21Rik	0	0	0	0	0	0	0	0	0	0	0
1700016P04Rik	0	0	0	0	0	0	0	0	0	0	0
1700017B05Rik	17.497	16.3932	17.4806	15.9514	16.7641	12.7188	16.5191	16.5997	16.8441	15.1504	15.6861
1700017D01Rik	0	0	0	0	0	0	0	0	0	0	0
1700017G19Rik	0	0	0	0	0	0	0	0	0	0	0
1700017J07Rik	0	0	0	0	0	0	0	0	0	0	0
1700017L05Rik	0	0	0	0	0	0	0	0	0	0	0
1700017N19Rik	0	0	0	0	0	0	0	0	0	0	0
1700018A04Rik	0	0	0	0	0	0	0	0	0	0	0
1700018B08Rik	0	0.46363	0.653258	0.31529	1.02658	0.617475	0.147123	0	0	0.233997	0
1700018B24Rik	1.25397	1.36414	1.19656	1.91439	2.87472	3.85094	1.44129	0.899267	1.42483	1.97461	1.73118
1700018C11Rik	0	0	0	0	0	0	0	0	0	0	0
1700018F24Rik	0	0	0	0	0	0	0	0	0	0	0
1700018G05Rik	0	0	0	0	0	0	0	0	0	0	0
1700018L02Rik	2.28389	2.1464	2.50333	2.25436	2.47065	2.06699	4.29885	3.38402	3.62625	3.54854	2.22824
1700019A02Rik	0.696561	0.90644	0	0	0	0.334301	0	0	0	0	0
1700019B03Rik	0	0	0	0.090474	0.071106	0	0	0.064096	0	0	0
1700019B21Rik	0	0	0.18049	0.26048	0.460618	1.0205	0	0	0	0	0
1700019C18Rik	0	0	0	0	0	0	0	0	0	0	0
1700019D03Rik	11.467	9.85868	12.4762	0.641597	2.25873	0.591189	2.39519	5.05623	1.63025	1.83446	2.00907
1700019E08Rik	0	0	0	0	0	0	0	0	0	0	0
1700019G17Rik	4.52103	5.61676	5.47982	6.90227	7.04326	7.30118	5.67767	5.33657	6.07298	6.23749	6.30714
1700019G24Rik	0	0	0	0	0	0	0	0	0	0	0
1700019L03Rik	0.127583	0	0.493405	0.275991	0.259889	0.332041	0.22214	0.893754	0.241605	0.275636	0.26511
1700019M22Rik	0	0	0	0	0	0	0	0	0	0	0
1700019N19Rik	0	0	0	0	0	0	0	0	0	0	0
1700019O17Rik	0	0.064836	0.026114	0	0	0	0	0.030036	0.037437	0.03671	0
1700020A23Rik	0	0	0.12804	0.138589	0	0	0	0.355882	0	0.43143	0.472484
1700020D05Rik	0.290626	0.383252	0.478529	0.525115	0.822592	0.791412	0.970668	1.05518	0.398343	1.60738	0.836999
1700020D14Rik	0	0	0	0	0	0	0	0	0	0	0
1700020G17Rik	0	0	0	0	0	0	0	0	0	0	0
1700020I14Rik	24.6112	25.4418	26.2183	20.769	18.2722	23.0942	22.6355	40.175	15.2806	28.66	24.9287
1700020L24Rik	9.25599	10.8756	8.28961	11.7291	11.0834	9.3145	8.63556	7.6117	10.9868	7.65776	8.44384
1700020M21Rik	0	0	0	0	0	0	0	0	0	0	0
1700020N01Rik	0.225553	0.105167	0	0.412633	0.576532	0.491357	0.299516	0.097443	0.182179	0.714561	0.44596
1700020N15Rik	0	0	0	0	0	0	0	0	0	0	0.114988
1700020N18Rik	0	0	0	0	0	0	0	0	0	0	0
1700021F05Rik	63.5921	58.7939	60.0061	44.7025	47.2697	42.3705	49.9074	50.8286	54.8951	35.9341	42.8707
1700021F07Rik	0	0	0	0	0	0	0	0	0	0	0
1700021K19Rik	6.39697	8.24085	8.60544	9.76993	10.2541	11.0741	8.54367	8.48338	8.05799	11.5857	10.026
1700021N21Rik	0	0	0	0	0	0	0	0	0	0	0
1700022A21Rik	0	0	0	0	0	0	0	0	0	0	0
1700022A22Rik	0	0	0	0	0	0	0	0	0	0	0
1700022E09Rik	0	0	0	0	0	0	0	0	0	0	0
1700022H01Rik	0	0	0.131409	0.213355	0.380265	0.348823	0.34845	0.424357	0	0	0.413912
1700022H16Rik	0	0	0	0	0	0	0	0	0	0	0
1700022I11Rik	0	0	0.069336	0.052221	0	0.025614	0	0.027748	0	0.117846	0.063585
1700023C21Rik	0	0	0	0	0	0	0	0	0	0	0
1700023F02Rik	0	0	0	0	0	0	0	0	0	0	0
1700023F06Rik	0	0	1.28486	0	0.758463	0	0	0	0	0	0
1700024B18Rik	0	0	0	0	0	0	0	0	0	0	0
1700024F13Rik	0.268286	0.47604	0.705368	0.241099	0.247636	0.666351	0.983505	0.84613	0.433389	0.456452	0.531204
1700024G13Rik	0	0	0	0	0	0	0	0	0	0	0
1700024I08Rik	0	0	0	0	0	0	0	0	0	0	0
1700024N05Rik	0	0	0	0	0	0	0	0	0	0	0
1700024P04Rik	0	0	0	0	0	0	0	0	0	0	0
1700024P16Rik	0	0	0	0	0	0	0.031825	0	0	0	0.029486
1700025B11Rik	0	0	0	0	0	0	0	0	0	0	0
1700025C18Rik	0	0	0	0	0	0	0	0	0	0	0
1700025F22Rik	0	0	0	0	0	0	0	0	0	0	0
1700025F24Rik	0.267686	0	0.129478	0	0.478064	0	0.367644	0.131596	0	0	0.45139
1700025G04Rik	3.939	4.12575	4.14122	4.62206	4.37362	4.57993	4.05097	4.05872	3.9598	4.45813	3.84149
1700025J12Rik	0	0	0	0	0	0	0	0	0	0	0
1700025K24Rik	0	0	0	0	0	0	0	0	0	0	0
1700025M24Rik	0	0	0	0	0	0	0	0	0	0	0
1700025N23Rik	0	0	0	0	0	0	0	0	0.095241	0	0
1700026D08Rik	12.0453	14.7195	12.8871	20.0068	20.276	17.0888	18.2972	15.4173	20.3798	15.0347	14.9785
1700026D11Rik	0	0	0	0	0	0	0	0	0	0	0
1700026F02Rik	0	0	0	0	0	0	0	0	0	0	0
1700026J14Rik	0.289616	0.392825	0.278489	0.717652	0.709272	0.420696	0.350206	0.195315	0.324586	0.632587	0.63084
1700026L06Rik	1.98165	2.49847	0.809239	4.5248	2.48802	1.24909	1.84857	2.60831	3.62362	1.36691	1.23143
1700027A15Rik	0	0	0	0	0	0	0	0	0	0	0
1700027F06Rik	0	0	0	0	0	0	0	0	0	0	0
1700027F09Rik	0	0	0	0	0	0	0	0	0	0	0
1700027H10Rik	0	0	0	0	0	0	0	0	0	0	0
1700027I24Rik	0	0	0	0	0	0	0	0	0	0	0
1700027J07Rik	0	0	0.084797	0	0	0	0.182424	0	0	0	0
1700028B04Rik	0.216768	0.130127	0.11093	0.122272	0.233751	0.250697	0.07736	0.229436	0.125477	0.253231	0.201723
1700028D13Rik	0	0	0	0	0	0	0	0	0	0	0
1700028E10Rik	1.58228	1.71349	1.78346	1.20724	1.82043	3.10539	1.18103	0.981501	1.51339	2.52799	2.33786
1700028I16Rik	1.92352	2.10404	1.40337	1.08892	0.649859	0.973248	1.00505	1.1747	0.854192	0.714954	1.30125
1700028J19Rik	0.777558	0.587	0.476807	1.18617	1.62076	2.56086	0.501979	0.348397	0.624222	1.7455	1.26082
1700028K03Rik	4.48898	4.94697	4.44993	7.60639	7.85527	15.8762	4.20548	4.61437	6.3679	6.65364	6.42425
1700028M03Rik	0	0	0	0	0	0	0	0	0	0	0
1700028P14Rik	0	0	0	0	0	0	0	0	0	0	0
1700028P15Rik	0	0	0	0	0	0	0	0	0	0	0
1700029B22Rik	0	0	0	0	0	0	0	0	0	0	0
1700029F12Rik	0	0	0	0	0.067072	0.083717	0	0	0.163902	0	0
1700029H14Rik	0	0	0	0	0	0	0	0	0	0	0
1700029I15Rik	0	0.508324	0	0	1.69606	0	0	0	0	0	0
1700029J03Rik	0	0	0	0	0	0	0	0	0	0	0
1700029J07Rik	2.31279	3.09735	3.14912	6.33716	4.89781	9.50939	6.48295	5.06342	5.33686	8.30134	5.73156
1700029M20Rik	0.080766	0.131804	0.090627	0.295513	0.244832	0.434833	0.718687	0.418712	0.413156	0.426454	0.413386
1700029N11Rik	0	0	0	0	0	0	0	0	0	0	0
1700029P11Rik	2.33118	2.06559	3.46117	0.885962	1.09859	1.66247	0.620677	0.731987	0.755045	1.04887	1.06196
1700030A11Rik	0	0	0	0	0	0	0	0	0	0	0
1700030C10Rik	4.8357	3.95119	4.11318	5.49343	5.59121	8.48037	4.0377	4.13135	3.45738	5.76932	6.15991
1700030F04Rik	0	0	0	0	0	0	0	0	0	0	0
1700030F18Rik	0	0	0	0	0	0	0	0.151296	0	0	0
1700030J22Rik	1.90801	1.30979	1.61177	1.50837	1.63136	2.12068	1.16966	1.56507	1.57226	1.84084	1.68278
1700030K09Rik	8.22697	8.38743	8.56844	12.9996	13.2522	15.4866	9.0436	8.87954	10.3423	12.1063	12.2092
1700030L20Rik	0	0	0	0	0	0	0	0	0	0	0
1700030M09Rik	0	0	0	0	0	0	0	0	0	0	0
1700030N03Rik	0	0	0	0	0	0	0	0	0	0	0
1700030O20Rik	0	0	0	0	0	0	0	0	0	0	0
1700031A10Rik	0	0	0	0	0	0	0	0	0	0	0
1700031F05Rik	0	0	0	0.259319	0.137276	0.616882	0.058417	0	0	0.15485	0.209045
1700031M16Rik	0	0	0	0	0	0	0	0	0	0	0
1700031P21Rik	0	0	0	0	0	0	0	0	0	0	0
1700034E13Rik	0	0	0	0	0	0	0	0	0	0	0
1700034G24Rik	0	0	0	0	0	0	0	0	0	0	0
1700034H15Rik	0.327629	0.319754	0.3094	0.778405	0.910205	0.880483	0.615156	0.494647	0.545414	0.777843	0.847839
1700034I23Rik	0.012757	0	0.019166	0.145208	0.087019	0.193318	0.059288	0.05511	0.096164	0.173103	0.090928
1700034J05Rik	0	0	0	0	0	0	0	0	0	0	0
1700034K08Rik	0	0	0	0	0	0	0	0	0	0	0
1700034O15Rik	0	0	0.181951	0	0	0	0	0	0	0	0
1700034P13Rik	0	0.052428	0.366309	1.1923	0.149514	0.039466	0.414386	0	0	2.36494	0.266237
1700036G14Rik	0	0	0	0	0	0	0	0	0	0	0
1700037C18Rik	3.95944	5.46209	3.23663	6.45973	6.02994	7.98385	4.75518	4.04667	4.10976	6.50077	5.3902
1700037H04Rik	70.6003	69.6753	65.4502	60.3306	64.387	58.6037	56.4769	51.4272	58.6832	47.9982	55.6049
1700039E15Rik	0	0	0	0	0	0	0	0	0	0	0
1700039E22Rik	0	0	0	0	0	0	0	0	0	0	0
1700040L02Rik	0.385402	0.494177	0.217812	1.1729	0.422681	0.500124	0.638205	0.625291	0.832705	0.344173	0.343511
1700041A01Rik	0	0	0	0	0	0	0	0	0	0	0
1700041C23Rik	0	0	0	0	0	0	0	0	0	0	0
1700041M19Rik	0	0	0	0	0	0	0	0	0	0	0
1700042G07Rik	0	0	0	0	0.292586	0	0	0	0	0	0.604381
1700042G15Rik	0	0	0	0	0	0	0	0	0	0	0
1700042O10Rik	0	0	0	0.181003	0.174226	0	0.221712	0.240435	0	0.176314	0.352621
1700044C05Rik	0	0	0	0	0	0	0	0	0	0	0
1700044K03Rik	0	0	0	0	0	0	0	0	0	0	0
1700045H11Rik	0	0	0	0	0	0	0	0	0	0	0
1700046C09Rik	0	0	0	0	0	0	0	0	0	0	0
1700047A11Rik	0	0	0	0	0	0	0	0	0	0	0
1700047E10Rik	0	0.216091	0	0	0	0	0	0	0	0	0
1700047G03Rik	0	0	0	0	0	0	0	0	0	0	0
1700047I17Rik2	0	0	0	0	0	0	0	0	0	0	0
1700047L14Rik	0	0	0	0	0	0	0	0	0	0	0
1700047M11Rik	0.327665	0	0	0	0	0	0	0	0	0	0
1700048M11Rik	1.07068	0.924068	0.314796	1.00714	0.764165	0.89458	1.42554	0.971506	0.800379	1.25948	1.3391
1700048O20Rik	4.83384	6.10487	5.90005	11.0209	10.9571	12.9425	6.76426	5.80703	6.87393	8.62844	12.4489
1700049E15Rik	0	0	0	0	0	0	0	0	0	0	0
1700049E22Rik	0	0	0	0	0	0	0	0	0	0	0
1700049G17Rik	2.32026	2.77661	2.8068	3.59797	3.29116	3.65376	4.45766	4.11362	3.24224	4.04927	3.9624
1700049L16Rik	0.037114	0.03461	0.02788	0.060354	0	0.029602	0	0.128272	0.073944	0.039193	0.174896
1700051A21Rik	0	0	0	0	0	0	0	0	0	0	0
1700052I22Rik	0	0	0	0	0	0	0	0	0	0	0
1700052K11Rik	4.05187	4.73328	4.30117	7.8639	7.04935	8.23864	5.57863	5.06643	6.24205	7.74645	6.76953
1700054A03Rik	0	0	0	0	0	0	0	0	0	0	0.121496
1700054K19Rik	0	0	0	0	0	0	0	0	0	0	0
1700054M17Rik	0	0	0	0	0	0	0	0	0	0	0
1700055C04Rik	0	0	0	0	0	0	0	0	0	0	0
1700056E22Rik	0.742436	0.980807	0.975989	1.13815	0.98741	0.884551	1.02286	0.748406	0.994442	0.914693	0.931009
1700057G04Rik	0	0	0	0	0	0	0	0	0	0	0
1700057H15Rik	0	0	0	0	0	0	0	0	0	0	0
1700057H21Rik	0	0	0	0	0	0	0	0	0	0	0
1700060C16Rik	0	0	0	0	0	0	0	0	0	0	0
1700060C20Rik	0	0	0	0	0	0	0	0	0	0	0
1700061F12Rik	0	0	0	0	0	0	0	0	0	0	0
1700061G19Rik	3.86318	1.8576	3.37382	0.65689	0.521949	0.374592	1.27781	1.52026	0.823643	0.351857	0.773248
1700061I17Rik	0	0	0	0	0	0	0	0	0	0	0
1700061J23Rik	0	0	0	0	0	0	0	0	0	0	0
1700063A18Rik	0	0	0	0	0	0	0	0	0	0	0
1700063D05Rik	0	0	0	0	0	0	0	0	0	0	0
1700063O14Rik	0	0	0	0	0	0	0	0	0	0	0
1700064J06Rik	0	0	0	0	0	0	0	0	0	0	0
1700064M15Rik	0	0	0	0	0	0	0	0	0	0	0
1700065D16Rik	0	0	0	0	0.532303	0	0	0	0	1.24219	0.8688
1700065I16Rik	0	0	0	0	0	0	0	0.091981	0	0	0
1700065J11Rik	0	0	0	0	0	0	0	0	0	0	0
1700065J18Rik	0	0	0	0	0	0	0	0	0	0	0
1700065L07Rik	0	0	0	0	0	0	0	0	0	0	0
1700065O20Rik	0	0	0	0	0	0	0	0	0	0	0
1700066B17Rik	0	0	0	0	0	0	0	0	0	0	0
1700066B19Rik	0.286118	0.300788	0.107689	0.668768	0.366434	0.412751	0.380338	0.268377	0.334504	0.277544	0.358593
1700066J03Rik	0	0	0	0	0	0	0	0.189179	0	0	0
1700066M21Rik	6.1293	6.54146	6.59792	6.34011	7.56307	7.19712	7.57114	7.42633	7.04264	7.0071	7.61327
1700066N21Rik	0	0	0	0	0	0	0	0	0	0	0
1700066O22Rik	0	0	0	0.101343	0	0	0	0	0	0	0.190418
1700067G17Rik	0	0	0	0	0	0	0	0	0	0	0
1700067K01Rik	1.4848	1.15673	0.833205	1.86831	0.898272	0.783635	2.06672	0.903682	1.65837	0.972376	1.30623
1700067P10Rik	0	0	0	0	0	0	0.141333	0	0	0	0
1700069L16Rik	0	0	0	0	0	0	0	0	0	0	0.131942
1700069P05Rik	0	0	0	0	0	0	0	0	0	0	0
1700071K01Rik	1.04228	0.998821	1.1176	0.496758	0.516257	0.60821	0.817682	0.613383	0.548818	0.528015	0.762715
1700071M16Rik	0	0	0	0.440503	0.045603	0.075127	0.141283	0.082578	0	0.050463	0.075693
1700072B07Rik	0	0	0	0	0	0	0	0	0	0	0
1700072I22Rik	0	0	0	0	0	0	0	0	0	0	0
1700072O05Rik	0	0	0	0	0	0	0	0	0	0	0
1700073E17Rik	0.092038	0.027294	0.041287	0.064997	0.070521	0.069	0.035845	0.043836	0.055338	0.044647	0.117454
1700074H08Rik	0	0	0	0	0	0	0	0	0	0	0
1700074P13Rik	0	0	0	0	0	0	0	0	0	0	0
1700080E11Rik	0	0	0	0	0	0	0	0	0	0	0
1700080N15Rik	0	0	0	0	0	0	0	0	0	0	0
1700080O16Rik	0.820885	0.80482	0.556366	0.23419	0.47329	0.455365	0.190557	0.350338	0.531752	0.476886	0.580887
1700081H04Rik	0	0	0	0	0	0	0	0	0	0	0
1700084C01Rik	0	0	0	0	0.106198	0	0	0.071797	0.13423	0	0
1700084D21Rik	0	0	0	0	0	0	0	0	0	0	0
1700084E18Rik	1.78863	1.92825	1.24005	1.8494	2.55462	1.45136	1.50335	1.65562	2.05242	3.1262	1.25282
1700084F23Rik	0	0	0	0	0	0	0	0	0	0	0
1700084J12Rik	2.58115	2.83183	2.62674	2.74389	2.45309	2.41124	3.05283	2.97862	2.68975	2.51002	2.68463
1700084M14Rik	0	0	0	0	0	0	0	0	0	0	0
1700085C21Rik	0	0	0	0	0	0	0	0	0	0	0
1700086L19Rik	0	0	0	0	0	0	0	0	0	0	0
1700086O06Rik	5.21198	4.20055	4.04524	4.53089	4.6423	5.91782	3.98365	3.54152	5.02309	2.94721	4.53473
1700088E04Rik	0.054909	0	0.752189	0	1.01879	0.083336	0.893683	0.205461	0.560665	0.15482	0
1700091H14Rik	0	0	0	0	0	0	0	0	0	0	0
1700092C02Rik	0	0	0	0	0	0	0	0	0	0	0
1700092C10Rik	0	0	0	0	0	0	0	0	0	0	0
1700092E19Rik	0	0	0	0	0	0	0	0	0	0	0
1700092K14Rik	0	0	0	0	0	0	0	0	0	0	0
1700092M07Rik	0	1.33882	0.615602	1.86856	0.668357	1.59245	0.800982	0	0.78789	1.33945	1.17882
1700093K21Rik	0.135972	0	0	0	0.196746	0	0.09028	0	0	0	0
1700094D03Rik	3.72507	4.00609	4.69124	3.41405	4.71636	3.12694	3.86601	2.72302	4.48837	2.76224	4.18124
1700094J05Rik	0	0	0	0	0	0	0	0	0	0	0
1700094M24Rik	0	0	0	0	0	0	0	0	0	0	0
1700095A21Rik	0	0	0	0	0	0	0	0.165741	0	0	0
1700095B10Rik	0	0	0	0	0	0	0	0	0	0	0
1700095J12Rik	0	0	0	0	0	0	0	0	0	0	0
1700096J18Rik	0	0	0.17227	0	0	0	0.349985	0	0.684906	0	0
1700096K18Rik	3.84917	6.17008	4.4911	4.209	4.13974	3.58304	4.35544	4.70289	6.00062	3.60261	4.01566
1700096P03Rik	0	0	0	0	0	0	0	0	0	0	0
1700097N02Rik	1.11403	0	0	0.733988	0.673572	0.213949	0	0.487877	0.377434	0	0
1700099I09Rik	0.141055	0.409221	0.436783	0.353835	0.633432	0.476058	0	0	0	0	0.380757
1700100I10Rik	0	0	0	0	0	0	0	0	0	0	0
1700100L14Rik	0	0	0	0	0	0	0	0	0	0	0
1700101E01Rik	0.383965	0.268897	0.481589	0.192726	0.272385	0.304997	0.298672	0	0.321893	0	0.353722
1700101I11Rik	0.222684	0.346096	0.440499	0	0.188547	0.288523	0.34376	0.506674	0.237818	0	0
1700101O22Rik	0	0	0	0	0	0	0	0	0	0	0
1700102H20Rik	1.16268	0	0.638608	0	0.206282	1.30254	0.87519	0.367272	0	0.566668	0.841625
1700102P08Rik	0.762832	0.777923	0.718312	0.851892	0.733426	1.01844	1.43782	0.550738	1.12314	0.805562	0.990428
1700104L18Rik	0	0	0	0	0	0	0	0	0	0	0
1700105P06Rik	0.558	0.595603	0.323906	0.701186	0.539026	0.060185	0.642372	0.55652	0.693645	0.910691	0.636048
1700106J16Rik	23.5618	30.5201	17.1611	19.8141	18.2022	21.0145	18.5134	16.881	21.8292	12.8354	14.6514
1700108F19Rik	0.894316	1.05566	1.29589	1.15105	0.728575	0	0.963046	0.811638	0.719173	0.685211	0.785246
1700108J01Rik	0	0	0	0	0	0	0	0	0	0	0
1700109G14Rik	0	0	0	0	0	0	0	0	0	0	0
1700109G15Rik	0	0	0	0	0	0	0	0	0	0	0
1700109H08Rik	0	0	0	0.44408	0	0.24269	0	1.32248	0	0.567511	0
1700109I08Rik	0	0	0	0	0	0	0	0	0	0	0
1700109K24Rik	0.54769	0	0.192537	0.250529	0.227108	0.850719	0.556729	1.59796	0.320139	1.53762	0.640775
1700110C19Rik	0.472057	0.263986	0.435726	0.450664	0.792955	0.528741	0.666088	0.521294	0.741792	0	0.578703
1700110I01Rik	0	0	0	0	0	0	0	0	0	0	0
1700110I07Rik	0	0	0	0	0	0	0	0	0	0	0
1700110K17Rik	0	0	0	0	0	0	0	0	0	0	0
1700111N16Rik	0	0	0	0	0	0	0	0	0	0	0
1700112E06Rik	0	0	0	0.213588	0	0	0	0	0	0	0
1700112H15Rik	0	0	0	0	0.095354	0	0.247555	0	0	0	0
1700112J05Rik	0	0	0.211227	0	0	0.178946	0	0.062699	0	0	0
1700112J16Rik	0	0.161013	0.142029	0.109131	0.262457	0.075402	0.307396	0.069215	0.330123	0	0.307835
1700113A16Rik	11.9801	14.6597	14.4252	14.7298	15.9555	14.6432	15.8282	12.4849	15.7387	12.3123	13.9563
1700113B09Rik	0	0	0	0	0	0	0	0	0	0	0
1700113H08Rik	0	0	0	0	0	0	0	0	0	0	0
1700116B05Rik	0	0	0	0	0	0	0	0	0	0	0
1700119H24Rik	0	0.190412	0	0.249034	0	0	0	0	0	0	0
1700120C14Rik	0	3.2788	0	0	3.12894	3.86298	3.14467	4.30622	0	0	5.50192
1700120E14Rik	0	0	0	0	0	0	0	0	0	0	0
1700120G07Rik	0	0	0	0	0	0	0	0	0	0	0
1700120K04Rik	1.4957	0.534275	0.647644	0.781631	1.19341	0.856831	1.4375	1.29948	1.10647	1.28278	1.24567
1700121L16Rik	0	0	0	0	0	0	0	0	0	0	0
1700121N20Rik	0	0.158352	0	0	0	0	0.077283	0.201142	0	0	0
1700122C19Rik	0	0	0	0	0	0	0	0	0	0	0
1700122O11Rik	0	0	0	0	0	0	0	0	0	0	0
1700123I01Rik	0.406148	0.085605	0.470153	19.0837	22.9738	37.432	0.944566	0.350125	0.795894	24.148	19.9512
1700123J17Rik	0.165728	0.122863	0	0	0.042361	0	0	0	0	0	0
1700123K08Rik	0	0	0	0	0	0	0	0	0	0	0
1700123L14Rik	0.034253	0	0	0	0	0	0	0	0	0.034316	0.027824
1700123M08Rik	0.841856	1.01989	0.955982	1.04411	1.31284	1.24891	0.959423	1.25136	1.01805	0.355605	1.15375
1700123O12Rik	0	0	0	0	0	0	0	0	0	0	0
1700123O20Rik	28.1549	30.4973	28.8798	31.2973	30.9397	29.4969	32.9736	26.8855	34.2848	27.3537	29.247
1700123O21Rik	0	0	0	0	0	0	0	0	0	0	0
1700124L16Rik	0	1.09952	2.08314	0.979775	0.759653	0	0.916083	0.597613	0	0	0.547786
1700125G02Rik	0	0	0	0	0	0	0	0	0	0	0
1700125G22Rik	0	0	0.156592	0.302829	0.222017	0.277113	0	0	0	0	0
1700125H03Rik	0	0	0	0	0.237461	0	0	0	0	0	0.490512
1700125H20Rik	0	0	0	0	0	0.293655	0	0.159057	0	0	0
1700126H18Rik	0	0	0	0	0	0	0	0	0	0	0
1700128A07Rik	0	0	0	0	0	0	0	0	0	0	0
1700128F08Rik	0	0	0	0	0	0	0	0	0	0	0
1700129C05Rik	0	0	0	0	0	0	0	0	0	0	0
1810006J02Rik	0	0.362953	0.078257	0.11534	0.113312	0.22629	0.117734	0.181555	0.190962	0	0.364581
1810007C17Rik	0	0	0	0	0	0	0	0	0	0	0
1810007D17Rik	0	0	0	0	0	0	0	0	0	0	0
1810008I18Rik	0	0	0	0	0	0	0	0	0	0.1529	0
1810009A15Rik	68.1876	82.9065	69.7403	72.8901	74.9548	62.1825	80.3496	67.8864	69.2988	50.4479	68.0826
1810009J06Rik	0	0	0	0	0	0	0	0	0	0	0
1810010D01Rik	1.20456	0.863462	0.886511	1.87492	1.61703	1.83171	1.72295	0.795758	1.99493	1.24877	1.58932
1810010H24Rik	1.30108	1.86053	1.71651	2.02801	1.73619	1.14304	1.70584	1.79589	2.91888	1.37635	2.19208
1810011H11Rik	0.528012	0.339932	0.274594	0.424334	0.207638	0.388749	0.268711	0.140376	0.825611	0.468712	0.410946
1810011O10Rik	19.4103	18.7764	16.3062	17.2915	16.3596	16.4856	15.7946	17.5723	17.6833	16.1615	17.1298
1810012K16Rik	0	0	0.412521	0.269251	0	0	0	0	0.445784	0	0
1810013A23Rik	0	0	0	0	0	0	0	0	0	0	0
1810013L24Rik	18.9745	18.6809	18.8661	17.7128	18.4003	20.6639	16.077	16.4035	15.2238	19.5884	16.8043
1810014B01Rik	4.68288	4.81278	5.94675	6.6276	6.34103	6.19474	7.00759	5.37181	5.75533	6.13528	6.20803
1810018F18Rik	0	0	0	0	0	0	0	0	0	0	0
1810019D21Rik	2.57939	2.80214	1.69938	2.24675	2.55159	2.14846	1.99974	1.7854	2.76472	2.32206	2.20974
1810020O05Rik	0.429331	0.373004	0.343396	0.122188	0	0.34833	0.189701	0	0.298708	0	0
1810021B22Rik	2.09001	0.919835	0.682936	2.65563	1.95438	1.15183	1.01643	1.06608	0.705016	2.12098	1.98949
1810022K09Rik	116.633	131.144	116.491	107.184	104.141	95.3307	116.52	99.6227	130.152	78.9587	105.037
1810024B03Rik	0.189029	0.131104	0.141996	0.114312	0.270276	0.452312	0	0.320666	0.203571	0.249523	0.218936
1810026B05Rik	2.4926	4.40574	5.33541	2.18826	6.80174	2.13158	8.33922	7.55454	2.73154	3.78226	5.02153
1810026J23Rik	17.9108	17.1879	17.4255	25.5338	24.9702	31.9358	20.2816	17.9381	19.7326	29.8451	24.1291
1810030O07Rik	34.7182	22.8767	35.0827	27.6065	31.1191	30.8909	31.655	31.2999	30.9063	27.6383	31.0185
1810032O08Rik	9.08654	8.75595	12.0523	10.8913	10.8677	7.81432	9.7263	8.19489	10.3568	5.35546	10.8231
1810034E14Rik	1.46047	1.47863	1.29663	1.95331	1.64897	1.757	1.62773	1.16034	1.6054	1.20082	1.88666
1810037I17Rik	49.5192	57.1011	50.2813	33.1436	38.3111	37.4452	28.4752	31.6152	38.7628	28.1239	38.2155
1810041H14Rik	0	0	0	0	2.70472	1.41367	0	0	0	0	0
1810041L15Rik	0.878157	1.01443	0.82581	1.35136	1.11505	0.64417	0.995768	1.45396	1.23645	1.50064	0.942562
1810043G02Rik	11.4332	12.5348	12.3276	18.4494	18.2617	18.8993	14.3311	11.5959	15.1033	13.6368	15.1939
1810043H04Rik	46.5725	51.8971	41.4508	49.2085	52.3107	54.3237	52.1831	39.7145	56.3963	41.0089	49.074
1810044D09Rik	4.20324	3.36535	3.25321	9.55129	8.33532	4.01378	4.81453	5.20127	10.4463	3.49275	7.30983
1810046K07Rik	0	0	0	0	0	0	0	0	0	0	0
1810053B23Rik	0	0	0	0	0	0	0	0	0	0.098256	0
1810055G02Rik	16.1029	18.22	17.2891	17.6785	18.6515	15.9103	15.0603	12.6199	19.9	15.0495	16.7907
1810058I24Rik	72.7244	77.4451	71.9996	87.9543	86.3166	65.6102	93.9904	82.4184	107.357	58.1893	71.7062
1810062G17Rik	0.929003	1.28453	0.832487	1.01455	1.11266	1.27625	0.794245	1.02139	1.34318	1.0368	1.04025
1810062O18Rik	0.986424	0.449526	0	0.486411	0.509343	0	0.535214	0.56498	1.06105	0.27289	0.556167
1810063I02Rik	0	0	0	0	0	0	0	0	0	0	0
1810064F22Rik	2.23204	2.17231	3.39742	2.82487	3.2029	3.21359	2.98086	3.10716	2.84741	3.3	4.03283
1810065E05Rik	0	0.176418	0	0.157767	0.247986	0	0.171776	0.334329	0	0	0
2010001A14Rik	1.73236	1.39591	0.993384	3.8814	3.9157	4.10506	1.09109	2.02878	3.57104	1.84905	3.31852
2010001E11Rik	0	0.317205	0	0	0	0	0.523198	0.747736	0.387007	0.577069	0.559114
2010003K11Rik	0	0	0	0.125051	0.098281	0.399881	0.068078	0.177185	0	0.098214	0.162412
2010005H15Rik	0	0	0	0	5.20068	0	0	0	0	1.71373	0
2010009K17Rik	0.709384	0.822178	0.622105	0.506096	0.748866	0	0	0.400384	0.997095	0.710574	0.827133
2010010A06Rik	1.11308	1.52976	1.04429	1.65166	1.62631	1.47596	1.02688	0.681232	1.73401	1.17543	1.28101
2010012O05Rik	9.27836	8.25546	10.5033	13.1804	13.4419	12.7863	10.2848	9.82533	10.5773	12.3832	11.4096
2010016I18Rik	0	0	0	0.124891	0	0.061257	0.202059	0.127564	0	0	0.212131
2010106C02Rik	0	0	0	0	0	0	0	0	0	0	0
2010106E10Rik	0	0	0	0	0	0	0	0	0	0	0
2010107E04Rik	330.143	327.462	334	291.405	320.891	321.577	280.407	246.916	291.802	249.253	311.791
2010107G12Rik	0.499027	0.471877	0.509195	0.344709	0.509337	0.474002	0.375512	0.30961	0.415113	0.66551	0.483057
2010107G23Rik	3.15272	2.79678	4.87435	1.73812	2.75084	1.95245	2.45934	1.90754	2.49012	1.60047	1.95319
2010109A12Rik	0	0	0.246033	0.920879	0.834252	1.00849	0	0	0.352722	0	0.721108
2010109I03Rik	0	0.076871	0.027865	0.077337	0.044573	0.060691	0	0.054789	0.068288	0.05357	0.093746
2010111I01Rik	8.38029	7.72123	9.96375	8.59504	8.86983	8.05943	8.11748	7.91264	8.18093	5.80259	7.61472
2010204K13Rik	14.5442	13.5271	14.7292	15.6791	15.5347	11.2466	16.9438	16.4992	16.72	12.6543	13.9061
2010300C02Rik	1.34255	0.904151	1.80871	0.599554	0.95614	0.848427	1.06413	1.1358	1.37842	0.928468	0.962953
2010308F09Rik	0	0	0.43633	0.312885	0	0.399588	0	0.418233	0	0.511159	0
2010310C07Rik	0	0	0	0	0	0	0	0	0	0	0
2010315B03Rik	7.23317	8.10219	8.50892	8.60844	9.2211	10.7014	9.66126	9.57324	9.81717	8.91463	10.2452
2010320M18Rik	20.8394	22.9322	23.7242	26.9913	25.9819	21.8947	22.4583	18.5958	29.6143	19.8293	23.5136
2200002D01Rik	4.44579	6.96007	1.75292	5.75917	2.90281	4.01694	6.45797	1.44558	5.62758	2.43965	4.29547
2200002J24Rik	5.87134	6.26959	4.38103	5.32795	5.68802	4.04559	4.56468	5.03547	7.94584	1.71661	4.12311
2210010C04Rik	0	0	0	0	0	0	0	0	0	0	0
2210011C24Rik	2.37382	1.34216	2.73938	0.321796	1.65617	0.521514	0.683771	0.957363	0.497259	1.75362	1.93524
2210013O21Rik	37.2047	42.9037	39.634	41.5583	45.3907	38.2392	43.6979	37.9163	47.5658	35.4608	36.9476
2210015D19Rik	4.39364	5.54634	4.28432	4.50961	4.98201	4.45094	4.68373	5.02087	4.75636	3.39416	4.86561
2210016F16Rik	19.7497	19.206	20.2062	21.3912	22.1878	20.089	20.3611	19.5116	22.3197	19.676	19.3897
2210016L21Rik	26.8016	28.479	25.5477	30.4272	31.9977	26.8142	31.4612	28.0178	36.9792	26.1811	24.7197
2210018M11Rik	7.6404	9.58834	9.25663	11.9604	12.6208	16.7036	10.6924	12.1216	8.40609	17.3947	14.0355
2210019I11Rik	0	0	0	0	0	0	0	0	0	0	0
2210039B01Rik	0	0	0	0	0	0.068892	0	0	0	0	0
2210404E10Rik	0	0	0	0	0	0	0	0	0	0	0
2210404O09Rik	2.67389	3.17654	3.06008	3.666	3.36604	3.59286	3.88227	4.0057	3.38117	3.43447	4.46777
2210406O10Rik	0.640185	1.20526	0.738888	1.84124	2.05315	2.42615	1.07589	1.9122	1.33555	2.64748	1.15655
2210407C18Rik	0	0	0	0	0	0	0	0	0	0	0
2210408F21Rik	0	0	0	0	0	0	0	0	0	0	0
2210408I21Rik	2.02744	2.16763	2.08877	3.16853	1.13163	2.43226	2.79184	3.28399	2.23063	1.54413	2.39014
2210409D07Rik	0	0	0	0	0	0	0	0	0	0	0
2210409E12Rik	1.47057	2.56755	2.94149	4.14513	2.80058	2.61176	1.74031	1.53572	4.9035	3.11008	3.54119
2210414B05Rik	0	0	0	0	0	0	0	0	0	0	0
2210416O15Rik	0.512157	0.723225	0.59403	1.28218	1.26971	0.792407	1.07364	0.9593	0.640449	0	0.770106
2210417A02Rik	1.41139	0.787568	0.88766	0.968552	0.841219	0.699625	0.722242	0.845893	0.431623	0.459485	1.03382
2210420H20Rik	0	0	0	0	0	0	0	0	0	0	0
2300002M23Rik	0	0	0	0	0	0	0.127318	0.082843	0.206508	0.151873	0.075936
2300003K06Rik	0	0	0	0	0	0	0	0	0	0	0
2300005B03Rik	0	0	0	0	0	0	0	0	0	0	0
2300009A05Rik	13.852	14.764	17.8678	17.4873	17.1247	15.1143	19.7288	13.589	18.6361	14.3777	16.5109
2310001H17Rik	0.828642	0	0.558663	0	0.410648	0	0.684253	0	0.973402	0	0
2310001K24Rik	0	0.433471	0	0.10598	0.078594	0.234435	0	0	0.280743	0	0.107735
2310002D06Rik	0	0	0	0	0	0	0	0.203517	0	0	0
2310002F09Rik	0.04685	0.196599	0.05279	0.114279	0.070072	0	0.077767	0.078937	0.125506	0.074212	0.129869
2310002L09Rik	0	0	0	0.20311	0	0	0	0	0	0	0
2310003N18Rik	0	0	0	0	0	0	0	0	0	0	0
2310005A03Rik	0	0	0	0	0	0	0	0	0	0	0
2310005E17Rik	0	0	0	0	0	0	0	0	0	0	0
2310007B03Rik	0.181926	0.434425	0.272834	0.355541	0.165248	0.366879	0.306971	0.355926	0.475811	0.109782	0.284569
2310008N11Rik	0	0	0	0	0	0	0	0	0	0	0
2310009A05Rik	23.9646	17.5778	27.1799	18.3876	19.0323	17.977	29.5846	29.0776	19.3059	22.5365	18.1862
2310009B15Rik	18.882	22.413	21.9186	18.8232	18.0042	17.0392	29.5046	22.7861	23.7603	13.2921	22.8626
2310010G23Rik	5.1318	3.4896	5.175	3.49488	4.26326	3.30977	3.04768	3.28494	3.88564	3.1443	3.42024
2310010J17Rik	5.38806	6.74306	4.35738	7.13725	7.54789	9.43049	5.48794	5.89342	6.07181	8.30556	5.73329
2310011J03Rik	21.1435	18.332	18.6615	20.1338	21.041	17.6702	19.8622	16.7469	24.978	15.3176	20.7078
2310015A10Rik	6.21347	7.08813	5.68414	7.838	7.06844	6.13254	7.08451	7.90179	7.46705	6.42473	7.10063
2310015D24Rik	0	0	0	0	0	0	0	0	0	0	0
2310016D03Rik	0	0	0	0	0	0	0	0	0	0	0
2310020H05Rik	0	0	0	0	0	0	0	0	0	0	0
2310022A10Rik	12.0918	12.6589	14.256	11.6195	10.3296	9.89514	9.70268	10.239	10.1932	8.81408	8.9339
2310022B05Rik	22.8554	23.6998	21.4954	27.2007	24.0203	19.3884	23.6173	23.6919	28.5208	21.1287	21.8026
2310030A07Rik	0	0	0	0	0	0	0	0	0	0	0
2310030G06Rik	9.48395	11.0387	10.2793	8.06082	6.63713	4.98033	9.5503	9.56328	9.48801	5.751	6.35332
2310033P09Rik	27.141	26.0282	25.6663	31.4878	31.2389	29.1297	36.2223	28.0595	29.2377	29.1711	27.048
2310034C09Rik	0	0	0	0	0	0	0	0	0	0	0
2310034G01Rik	2.21507	3.45682	2.72475	4.2595	3.71639	3.85445	5.4796	3.60313	3.65079	3.35739	2.87728
2310034O05Rik	0	0	0	0	0	0	0	0	0.116405	0	0
2310035C23Rik	8.30116	8.74291	9.26093	12.3753	12.6507	17.7186	9.469	10.0939	8.96933	14.2876	13.2877
2310036O22Rik	154.032	141.516	140.031	125.943	136.016	112.597	131.151	118.508	143.441	110.95	121.347
2310039H08Rik	30.8195	25.5749	24.8998	27.9283	30.4824	22.7745	28.7544	23.2219	34.8575	23.2488	25.5016
2310039L15Rik	0	0	0	0.207735	0.294774	0	0	0	0	0	0
2310040G24Rik	2.85823	2.65995	3.31991	2.48526	2.68449	2.32437	3.73654	3.18888	3.52004	1.06112	3.41161
2310043L19Rik	0	0	0.128212	0	0.156626	0.336129	0.219312	0	0	0	0.326613
2310043O21Rik	0	0	0	0	0	0	0	0	0	0	0
2310045N01Rik	21.3707	32.4289	28.9843	31.6367	31.2987	29.824	33.5659	32.3605	21.5381	15.7424	31.4172
2310045n01rik-mef2b	0.154494	0	0.230658	0.590012	0.837837	0.335018	0	0.200233	0.207975	0.405831	0.756436
2310047M10Rik	6.78791	7.21996	6.38216	8.37853	8.08861	7.23596	8.67597	6.04358	10.5942	7.91142	7.38493
2310050C09Rik	0	0	0	0	0	0	0	0	0	0	0
2310057J18Rik	0	0	0	0	0	0	0	0	0	0	0
2310057M21Rik	10.3435	9.90063	11.1196	8.38944	10.6414	10.2107	10.1119	9.78551	8.16308	9.43201	10.3325
2310057N15Rik	0	0	0	0	0	0	0	0	0	0	0
2310061I04Rik	38.0572	36.4934	43.8356	52.8512	65.6144	80.0899	36.9555	31.8266	46.416	59.7107	56.1991
2310061N02Rik	0	0	0	0	0	0	0	0	0	0	0
2310065F04Rik	0	0	0	0	0	0	0	0	0	0	0
2310067B10Rik	13.2651	12.3619	14.1062	17.3012	16.0792	18.796	13.2985	13.1628	13.3459	17.2644	17.823
2310068J16Rik	2.92335	2.78953	2.00856	3.0224	3.60742	2.74565	3.30171	2.83254	2.13092	3.33584	3.15009
2310069B03Rik	0	0.09141	0	0.132173	0.12528	0	0.08678	0.135591	0.105566	0.138021	0.181149
2310069G16Rik	0	0	0	0	0.210164	0	0	0	0	0	0
2310075C17Rik	0	0	0	0	0	0	0	0	0	0	0
2310079G19Rik	0	0	0	0	0	0	0	0	0	0	0
2310081J21Rik	0	0	0	0	0	0	0	0	0	0	0
2400006E01Rik	0	0.157899	0	0	0.120799	0	0	0	0	0	0
2410002F23Rik	63.6733	61.0954	56.8654	57.9762	57.7094	52.0774	58.3454	51.2308	56.4023	51.4365	56.5383
2410003L11Rik	4.91469	2.90047	5.80832	0.463	1.2861	0	1.4002	1.84348	1.43322	1.13557	1.15086
2410004B18Rik	29.0458	31.2029	29.6286	22.0149	22.6279	19.2917	23.6818	22.0943	24.5817	18.1975	21.8818
2410004I01Rik	0.438989	0.526326	0.561775	0.356932	0.436814	0.350139	0.693284	0.575418	0.405223	0	0.343952
2410004P03Rik	0.282479	0.223411	0	0.25905	0.26363	0.243505	0.258488	0.286786	0.363124	0.105416	0.104755
2410006H16Rik	123.303	147.183	113.215	114.489	127.14	86.8725	110.308	96.8103	141.807	83.541	103.565
2410012E07Rik	1.80431	1.6214	1.22078	0.680202	1.01988	0.561761	0.707672	1.14187	1.5158	0.677165	0.920957
2410015M20Rik	109.471	123.061	100.274	118.969	120.132	106.473	121.87	105.028	140.318	95.4026	109.655
2410016O06Rik	18.0281	16.6867	17.4835	12.7765	13.4803	10.1123	15.2632	13.8003	14.2518	13.5461	12.217
2410017I17Rik	1.67511	1.09191	1.43949	0	0.144983	0	0.074333	0.240553	0.191884	0	0.061934
2410018L13Rik	2.48784	2.94962	2.61558	3.20572	3.41496	2.78224	3.52524	2.8677	3.3615	2.55949	2.85329
2410021H03Rik	0.469122	0	0.353874	0	0	0	0	0.473179	0	0	0.248732
2410089E03Rik	4.34218	3.64373	4.97545	6.72524	6.88592	8.67122	4.53399	5.10653	5.10516	8.96488	7.09806
2410124H12Rik	0	0	0	0	0	0	0	0	0	0	0
2410127L17Rik	11.5415	16.4891	10.463	12.3588	16.2187	9.32546	15.8261	18.3458	7.69813	14.4603	14.2209
2410131K14Rik	3.64569	4.34142	4.684	4.81891	4.05787	4.31625	4.48834	4.37465	4.15651	4.26409	4.73507
2410137M14Rik	0	0	0	0	0	0	0	0	0	0	0
2410141K09Rik	0.613309	0.355084	0.562055	0	0.205967	0.248116	0	0.408908	0.245593	0	0
2500002B13Rik	4.61453	4.74638	6.72013	0.842854	0.801253	1.41297	2.47538	3.3957	1.27585	2.81687	2.27534
2500004C02Rik	17.3913	20.3824	22.1542	22.7981	23.9586	24.323	23.1655	20.5799	22.7511	19.6624	23.0793
2510002D24Rik	16.4814	15.5522	13.4124	16.1123	15.6964	15.0719	17.4386	15.8143	16.6515	14.1559	15.0865
2510003B16Rik	1.09175	1.52712	0.908681	0	2.48798	1.39325	2.20505	0.868335	1.88744	1.14714	0.857067
2510009E07Rik	6.82745	7.8122	7.50235	8.5239	8.37126	8.50513	9.79371	9.79818	8.32799	8.854	8.37308
2510039O18Rik	26.4752	22.7422	27.8448	26.1539	26.5242	26.6382	23.0914	23.625	27.7207	27.1779	29.2282
2610001J05Rik	19.3254	22.8939	19.797	22.9157	22.3931	20.1379	23.9268	21.139	24.3549	18.3065	21.7772
2610002M06Rik	3.56848	5.89313	4.25583	5.46904	5.24643	5.29358	5.43898	5.49087	6.79005	4.40247	5.05698
2610005L07Rik	1.29305	1.60307	1.5432	1.60113	1.56835	1.77158	2.24625	2.30717	1.61132	1.9907	1.4462
2610008E11Rik	17.4408	19.1832	18.6082	22.9607	20.0136	21.1683	25.1347	25.7104	20.6912	22.0062	20.9355
2610015P09Rik	5.00295	3.73748	5.18986	6.14832	6.80693	9.0362	5.80659	5.04831	4.91473	7.32076	7.33094
2610016A17Rik	0	0	0	0	0	0	0	0	0	0	0
2610020C07Rik	5.07908	5.37886	5.93018	6.23012	6.3671	6.34837	5.3899	5.70768	5.52719	6.83479	6.52494
2610020H08Rik	9.83319	8.88454	10.047	15.341	13.1265	14.4791	9.07015	9.59248	8.97043	15.2396	15.2608
2610027K06Rik	1.12203	1.35454	1.10762	3.09985	1.22811	1.72904	2.37928	1.62821	1.36185	1.95469	1.13352
2610028E06Rik	6.20391	7.41215	6.61558	9.01717	8.99383	8.57739	8.67075	8.5776	8.41806	7.59174	7.77013
2610028H24Rik	0	0	0	0	0	0	0	0	0	0	0
2610035D17Rik	5.67928	5.8187	5.65666	6.51396	6.6973	7.23982	8.26573	5.96926	7.33908	6.53971	7.90045
2610035F20Rik	0	0	0.156457	0.084673	0.295016	0.110973	0.21825	0.13497	0.112151	0.164959	0
2610037D02Rik	0.302144	0.215111	0.276311	0.04689	0.119794	0.039427	0.048708	0.227075	0.179603	0.0522	0.091348
2610042L04Rik	0	0	0	0	0.144252	0.198376	0	0	0	0	0
2610044O15Rik8	8.59956	9.68365	9.24178	7.76243	7.89833	6.99575	7.93627	6.40981	9.17951	5.43389	8.31588
2610100L16Rik	0	0.032746	0	0.481981	0.670174	0.975529	0.273759	0.252912	0.42544	0.623834	0.299388
2610203C22Rik	0.428887	0.26887	0.18049	0.258178	0.214955	0.222289	0.191438	0.404368	0.256169	0.38282	0.304472
2610206C17Rik	0.174222	1.20824	0.340272	0.333617	0.378528	0.471075	0.34703	0.240102	0.52535	0.209003	0.661629
2610301B20Rik	16.1991	17.4754	16.974	19.3684	18.2042	21.8268	19.6819	18.088	17.743	19.2712	21.0931
2610305D13Rik	26.1632	27.1985	21.6261	7.50401	10.7128	9.7863	9.98857	12.5476	11.4209	8.89567	13.3041
2610306M01Rik	5.94518	7.25035	5.77422	10.3829	9.36555	10.1599	8.97328	7.1191	7.90583	8.12347	8.04809
2610307P16Rik	0.868969	1.28945	1.40467	0.630705	0.872584	0.652472	0.720466	1.17556	1.50819	0.894948	1.16139
2610316D01Rik	0	0.302553	0	0	0	0	0.428684	0.320226	0	0	0.438905
2610318N02Rik	8.1768	5.8149	6.64084	3.41011	6.62489	6.17904	5.28619	4.61681	6.15719	3.25626	5.74208
2610507B11Rik	32.3728	33.4558	33.5785	30.2792	28.3409	29.9601	33.9544	38.4537	27.4959	38.378	32.9746
2610507I01Rik	14.6063	17.4905	15.1973	22.2945	22.8867	20.4573	23.3646	22.1824	19.6548	21.2471	20.3468
2610524H06Rik	30.0427	28.9741	27.493	21.5459	28.4119	24.8908	25.7205	24.8233	30.4818	21.8822	31.097
2610528A11Rik	0	0	0	0	0.202282	0	0.157632	0.2718	0	0	0
2610528J11Rik	0.261542	0.36584	0.386795	0	0.125349	0	0.260481	0.169487	0	0	0
2700029M09Rik	71.0054	64.206	70.2287	47.3266	52.1988	46.0827	43.6885	50.1871	40.6839	38.3897	50.8351
2700038G22Rik	13.4081	14.7034	14.4971	8.73137	10	7.42322	9.74493	9.20412	9.16785	7.46009	8.99029
2700046A07Rik	1.45432	0.836336	0.946248	0.83676	0.680205	0.4905	0.43541	0.726447	0.782349	0.503538	0.505322
2700046G09Rik	5.91625	7.07242	6.79212	7.46416	7.24841	6.78272	7.43466	6.58697	8.13529	5.16879	6.77277
2700049A03Rik	6.31645	5.77002	7.56217	4.12768	4.72868	4.9985	5.52826	5.30279	4.6143	4.16693	4.29439
2700054A10Rik	0.412452	0.259514	0.381407	0.36808	0.370044	0.359451	0.773057	0.475263	0.564953	0.435192	0.58379
2700060E02Rik	148.995	153.131	158	138.946	141.62	168.409	123.024	129.119	129.488	144.826	140.65
2700062C07Rik	23.9266	26.7661	24.7551	25.37	21.6426	21.492	20.384	20.58	23.6671	16.3262	20.3759
2700069I18Rik	0	0	0	0	0.205334	0	0	0.132209	0.453156	0	0
2700070H01Rik	0.204737	0.159768	0.28314	0.367762	0.197069	0.272621	0.32496	0.493744	0.534153	0.260532	0.135692
2700081O15Rik	35.5541	36.6058	38.3419	38.1201	35.7006	37.0606	43.6731	40.9312	37.4994	40.8534	36.2028
2700089I24Rik	0.128017	0	0	0.085201	0.083703	0.235068	0.11306	0.141471	0.246861	0.069162	0.155611
2700094K13Rik	348.68	335.906	334.798	230.97	255.433	215.269	229.538	242.699	233.169	198.095	255.015
2700097O09Rik	19.2743	21.8748	22.1306	15.493	17.2574	20.4593	20.1613	17.7191	18.2132	14.0411	19.6735
2700099C18Rik	15.5257	18.4473	17.2681	7.89095	15.6119	14.4171	13.6296	10.4337	10.1979	7.52608	10.4489
2810001G20Rik	38.6723	47.6	36.4387	49.7758	53.7508	49.6679	47.1389	46.058	54.3119	43.27	51.7971
2810002D19Rik	5.53872	7.44063	5.90356	7.05113	6.61695	6.2341	6.20785	7.10872	7.49557	6.50571	5.26317
2810004N23Rik	74.8833	82.0056	72.6129	50.0272	52.0299	46.8472	52.7814	59.1539	49.589	44.34	52.0421
2810006K23Rik	13.6803	14.4294	15.8646	15.3076	15.2969	17.3468	14.5507	15.4437	12.4969	12.9785	13.9878
2810013P06Rik	10.4205	11.7152	10.9762	13.2358	13.273	13.5198	12.3675	11.5361	13.8408	12.688	12.5363
2810021J22Rik	4.39007	4.57355	4.37259	4.70012	4.6955	4.9389	5.22143	5.3414	4.15999	4.86938	4.90398
2810025M15Rik	31.4019	29.8557	29.0329	29.4556	32.2457	24.404	29.1843	27.9743	31.0382	24.4194	24.8786
2810029C07Rik	1.93521	1.9087	1.81237	2.93185	2.59411	2.8066	2.16192	2.21426	2.4633	2.88188	2.51199
2810032G03Rik	0.332906	0.532184	0.500149	1.3938	1.08107	1.05642	0.750429	0.575285	1.27914	0.602663	1.24203
2810047C21Rik1	0	0	0.288667	0	0.325338	0.407925	0	0	0	0	0
2810049E08Rik	0	0	0	0	0.169993	0	0	0	0	0	0
2810403A07Rik	55.8639	58.5382	58.4304	59.3234	55.7373	62.8469	57.3161	59.0459	54.1397	58.7826	57.8858
2810403D21Rik	0.84764	0.744894	0.84965	1.26741	0.855269	1.59035	0.783248	0.750558	1.51892	0.718715	1.25771
2810404M03Rik	0	0	0	0	0	0	0	0	0	0	0
2810405F15Rik	0.579354	0.785175	0.602032	0.842411	0.683054	0.798653	0.861655	0.426329	0.956684	0.609767	0.427491
2810408A11Rik	4.11316	4.80542	5.07318	8.39049	7.58329	6.56212	5.84465	5.12311	6.6499	5.40385	6.82179
2810408I11Rik	10.1321	10.0646	13.3691	8.76356	10.2053	10.5979	6.45155	8.6911	7.38059	8.73254	10.9321
2810410L24Rik	9.28329	10.2346	10.5996	11.4224	11.1497	10.3013	10.4445	10.5642	10.716	9.51137	10.7212
2810417H13Rik	31.1477	32.8334	31.8549	29.0986	27.847	26.6395	29.4037	33.0261	31.1996	23.5486	29.4636
2810428I15Rik	58.421	69.2606	56.7606	71.9194	70.8748	73.583	57.8603	47.6001	66.4703	58.6523	66.8128
2810429I04Rik	0	0.565476	2.37545	0.462044	0	0	0.336142	0.505013	0	0	1.30352
2810433D01Rik	0.224242	0.33353	0.355201	0.141759	0.343193	0.143085	0.486723	0.230567	0.434689	0.40751	0.34246
2810442N19Rik	0	0	0	0.096996	0	0.14846	0.125139	0.224998	0	0.206244	0.203661
2810454H06Rik	1.13832	1.58929	1.21503	2.74046	2.75164	2.54768	1.83676	1.87469	1.88046	2.62836	2.19348
2810459M11Rik	0.215083	0.167489	0.33629	0.525366	0.447333	0.587354	0.298133	0.325509	0.347685	0.397833	0.534574
2810468N07Rik	5.68847	7.5156	7.05529	9.69109	9.90417	10.6244	8.50267	7.1984	7.71671	7.91962	8.80844
2810471M01Rik	0	0	0	0	0	0	0	0	0	0	0
2810474O19Rik	21.3992	21.3359	23.5981	17.9936	17.3196	19.3306	21.2237	24.4496	18.3861	20.6599	19.715
2900005J15Rik	6.75307	6.86749	7.55485	8.46258	8.75624	7.27696	7.78883	9.51506	8.54901	9.14072	9.33568
2900008C10Rik	0.703857	1.33655	0.784499	1.51834	1.50008	0.976308	1.55608	0.752408	1.41652	1.3125	0.899763
2900009J06Rik	2.54537	2.74745	2.89693	3.68243	2.78495	2.58396	2.22587	2.99688	2.34206	2.6665	2.83305
2900011O08Rik	10.294	12.9398	12.236	14.7854	15.1814	14.4572	16.0895	13.1182	13.6191	13.7957	12.9774
2900026A02Rik	3.50388	3.66474	3.38927	2.72655	2.77577	2.55603	2.17532	3.02097	3.62279	2.74411	2.58757
2900041M22Rik	1.99504	1.82337	1.23473	0.430973	0.472151	0.282266	0.325116	0.829799	0.719091	0.846149	0.564089
2900052N01Rik	0	0.08633	0.139085	0	0.088738	0.109837	0.091239	0.139982	0.0997	0.146644	0.073321
2900055J20Rik	0	0	0	0	0	0	0.001642	0	0	0	0.018493
2900057B20Rik	0	0	0	0	0	0	0	0	0	0	0
2900060B14Rik	0.200428	0.280355	0.602237	0.325928	0.192117	0.31373	0.266153	0.346355	0.323771	0.105828	0.07937
2900076A07Rik	8.01136	10.3471	11.2885	10.9266	10.2586	11.3694	11.0735	10.9903	12.1304	6.19854	10.578
2900079G21Rik	0	0	0	0	0	0	0	0	0	0	0
2900092C05Rik	0	0	0	0	0	0	0	0	0	0	0
2900092D14Rik	0.021059	0.003928	0	0	0	0	0.013983	0	0	0	0
2900097C17Rik	24.777	25.4768	24.264	25.5644	24.4634	23.6926	24.9719	23.3458	24.4605	22.8331	23.2946
3000002C10Rik	6.85963	6.9341	6.84599	9.94837	10.8544	10.2255	8.48457	8.05981	8.9331	8.11627	9.17429
3010001F23Rik	0	1.29819	1.28565	1.33587	0	0	0	0.451922	1.53306	0	1.17555
3010026O09Rik	16.8869	15.1675	11.8193	16.8318	16.0005	15.4259	13.5117	10.5545	13.2646	12.9203	13.2866
3100003L05Rik	0	0	0	0	0	0	0	0	0	0	0
3110001I22Rik	5.88508	5.11847	6.40093	4.65167	5.0536	5.29766	5.04207	4.89816	3.87843	4.82177	4.95887
3110002H16Rik	34.9292	24.2958	33.3984	18.6023	23.1333	18.0882	22.4372	22.9195	20.887	19.6845	21.3917
3110009E18Rik	0	8.51638	4.72102	0.241533	5.50438	3.26814	0.197236	0.095177	3.03064	0.25096	5.70017
3110009F21Rik	0	0	0	0	0	0	0	0	0	0	0
3110015C05Rik	0	0	0	0	0	0	0	0	0	0	0
3110021A11Rik	1.4485	0.876807	1.01038	2.20643	1.6123	2.16878	1.51975	2.4843	2.02127	2.28488	2.64519
3110021N24Rik	0.528282	0.830548	0.446444	0.751014	0.743435	1.30892	1.17641	2.58895	0.497808	2.4964	1.3553
3110035E14Rik	0.144335	0.153759	0.173887	0.235956	0.153373	0.074001	0.049582	0.145981	0.221878	0	0.073595
3110039I08Rik	106.991	128.593	115.596	144.135	141.623	134.641	136.896	122.94	146.594	123.332	135.502
3110039M20Rik	0	0	0	0	0	0	0	0	0	0	0
3110040N11Rik	12.1273	16.1099	14.2632	19.0473	18.4954	19.4641	19.6436	11.639	16.4443	15.0295	19.5221
3110043O21Rik	15.9859	18.3613	18.8041	22.9961	23.2493	25.0389	24.9362	23.733	22.819	26.198	25.5548
3110045C21Rik	1.33711	1.77169	1.59595	1.62643	1.55334	1.89002	1.61445	1.89037	1.46742	1.82997	1.84343
3110052M02Rik	2.40589	2.77181	2.87939	2.81546	3.30721	3.25679	3.46147	3.46118	3.15003	3.25517	3.39762
3110056K07Rik	4.3994	4.77598	15.6717	4.72493	5.60504	6.55734	17.4731	17.1835	4.13862	4.66828	4.91563
3110057O12Rik	1.23881	1.27354	1.22426	5.67823	5.71731	12.3887	1.35616	2.51248	1.36967	8.71984	3.57415
3110062M04Rik	2.05068	2.2047	3.62468	5.20393	2.28738	1.25722	5.11437	5.10996	2.33702	4.93538	2.24845
3110070M22Rik	0.999784	0.732416	0.523261	1.55896	0.684638	1.43693	0.925586	1.37139	0.801097	0.313656	0.291946
3110079O15Rik	0	0	0	0	0	0	0	0	0	0	0
3110082I17Rik	17.9688	19.6307	13.9821	13.7711	14.6232	13.2988	14.8181	14.086	18.0268	11.7659	14.1868
3110082J24Rik	0	0	0	0	0	0	0	0	0	0	0
3110099E03Rik	0.113139	0.083028	0.133669	0.073592	0.101217	0.125885	0.17916	0.058654	0.17058	0.071686	0.16129
3200001D21Rik	0.215555	0.189914	0.327198	0.25046	0.099174	0.052255	0.229178	0.321519	0.197186	0.3096	0.096617
3300002I08Rik	0.637056	0.594964	0	0	0	0.909155	1.81561	2.29918	0.497149	1.59175	0
3300002P13Rik	0	0	0	0.267279	0.244197	0.30589	0.106402	0	0.175531	0	0.086783
3300005D01Rik	0	0	0	0	0.194892	0	0.131901	0	0.164224	0	0
3425401B19Rik	0.106509	0.060347	0.12072	0.140313	0.075815	0.017205	0.014322	0.055682	0.058078	0.034169	0
3632451O06Rik	2.99918	2.60098	3.72854	4.51278	4.79272	5.03577	2.90223	3.02117	2.78648	5.06293	4.80717
3632454L22Rik	0	0	0.049414	0.077888	0.073037	0.117724	0.167303	0.042628	0.035421	0.119066	0.065123
3830403N18Rik	2.28569	1.17598	1.51394	9.20948	6.37597	9.7175	1.67494	1.20998	2.73769	3.21554	5.40775
3830406C13Rik	10.5092	14.5183	2.45744	5.31313	15.6069	17.8655	15.4884	3.80544	14.8503	4.65972	10.4919
3830408C21Rik	1.29724	1.64868	1.32717	2.69169	2.20281	2.12437	2.89994	2.7089	2.24544	3.49682	2.36113
3830417A13Rik	0.253969	0.169166	0.081762	0	0	0.057876	0	0.188091	0.156291	0.153255	0
3830432H09Rik	0.247837	0.135361	0.167555	0.261964	0.221327	0.296513	0.411384	0.235019	0.320284	0.209376	0.176657
3930402G23Rik	0.105071	0.058789	0.047358	0.051259	0.053378	0.083386	0	0.070814	0.179143	0	0.04993
4430402I18Rik	0	0	0.14735	0.157666	0.159889	0.177394	0.110753	0.170892	0.149699	0.157942	0.220184
4631405J19Rik	0	0	0	0	0	0	0	0	0	0	0
4632404H12Rik	2.17229	2.4412	2.61406	3.30845	3.25368	3.70938	3.63756	3.99444	3.04129	4.27796	3.52098
4632415L05Rik	3.35508	3.70333	3.21391	3.42431	3.57818	3.64716	3.84608	4.29261	3.88909	4.89431	3.3976
4632427E13Rik	1.52875	2.03615	1.2817	1.74779	2.03518	1.75514	2.41641	3.63443	1.15999	3.55036	2.06625
4632428C04Rik	0.123204	0.229781	0.203146	0.180314	0.345624	0.176882	0.325165	0.400074	0.474094	0.390316	0.346975
4632428N05Rik	3.06515	3.00828	3.45985	2.12683	2.21098	2.17313	2.44758	2.39509	2.4078	2.02862	2.40005
4732416N19Rik	0	0	0	0	0	0	0	0	0	0	0
4732456N10Rik	0.047221	0	0	0.038394	0	0	0.062313	0.0612	0	0	0.036931
4732471J01Rik	0.486027	0.550488	0.85036	1.57211	1.77987	1.6117	0.776169	0.893095	0.721897	2.00082	1.63164
4732490B19Rik	0	0	0.126866	0	0.109411	0.055601	0.09744	0.084536	0.158046	0.076695	0.11623
4732491K20Rik	0.8289	0.769011	0.608501	0.873199	0.742884	0.676545	0.611056	0.636472	0.869833	0.415024	0.536031
4831407H17Rik	0	0	0	0	0	0	0.124883	0	0	0	0.07977
4831440E17Rik	2.05183	1.9071	2.12218	2.42652	2.2884	3.5302	2.56817	2.99141	2.02163	2.91749	2.64626
4833411C07Rik	0	0.09283	0	0	0	0	0	0	0	0	0
4833412C05Rik	0.165728	0	0.289447	0	0	0	0.10912	0.140809	0.118985	0	0.2595
4833415N18Rik	0.596783	0.278953	0.359536	0.678594	0.434116	0.477189	0.23834	0.15508	0.128861	0	0.189534
4833417C18Rik	0.766584	0.971789	1.14814	0.62696	0.403861	0.825307	1.07406	0.627062	1.10686	0.797523	0.718475
4833418N02Rik	1.35487	1.55672	0.920677	1.95067	1.47259	2.44541	1.28574	1.07822	1.81987	2.24281	1.52664
4833419F23Rik	0	0.118979	0	0.661204	0.858279	0.379152	0.541066	0.469408	0.357356	0.573705	0.476092
4833420G17Rik	35.7781	36.4547	36.526	38.8655	37.5336	36.1403	38.1368	36.4544	36.3398	37.0176	32.3818
4833422C13Rik	0.437201	0.792417	0.676996	0.724571	0.662191	0.64716	0.836097	0.869256	0.414461	1.00413	0.507968
4833422M21Rik	0	0	0	0	0	0	0	0	0	0	0
4833423E24Rik	0	0	0	0	0	0	0	0	0	0	0
4833427F10Rik	0	0	0	0	0	0	0	0	0	0	0
4833427G06Rik	0.30879	0	0	0.313838	0.614588	0.281969	0.25628	0.266806	0	0	0.336825
4833428L15Rik	0.28512	0.218243	0.535449	0	0.151073	0	0.094655	0.163211	0.153528	0.145528	0
4833439L19Rik	36.7157	37.0437	39.5233	30.4856	32.0147	28.7496	31.7125	29.9421	38.6138	27.9187	34.7125
4921501E09Rik	0	0	0.011477	0	0	0	0	0	0	0	0.012101
4921504A21Rik	0.570643	1.05896	0.87702	0.731255	0.724124	0.821284	1.08069	0.961533	1.16843	0.870339	0.909318
4921504E06Rik	0	0	0	0	0	0	0	0	0	0	0
4921506M07Rik	0	0	0	0	0	0	0	0	0	0	0
4921507L20Rik	0.684453	1.20713	0.871808	1.40969	1.5853	1.60903	1.58654	0.909625	1.39336	1.59159	1.6516
4921507P07Rik	0.665823	0.68717	0.825573	1.14213	1.60295	1.61833	0.559939	0.482827	0.855761	1.20786	1.23686
4921508D12Rik	0	0	0	0	0	0	0	0	0	0	0
4921509C19Rik	0	0	0	0	0	0	0	0.025699	0	0	0
4921509O07Rik	0	0	0	0	0	0	0	0	0	0	0
4921511C10Rik	0	0	0	0	0	0.061852	0	0	0.08808	0.086369	0
4921511C20Rik	0	0	0.027984	0	0	0	0	0	0	0	0
4921511H03Rik	0	0	0	0	0	0	0	0	0	0	0
4921511I17Rik	0	0	0	0	0	0	0	0	0	0	0
4921511M17Rik	0	0	0	0	0	0	0	0	0	0	0
4921513I03Rik	0	0.177001	0	0.147158	0.048516	0.060557	0.049785	0	0.122647	0.196825	0.073309
4921515E04Rik	0	0	0	0	0	0	0	0	0	0	0
4921517D22Rik	0.353693	0.364006	0	0.348734	0	0	0	0.304123	0.340881	0	0.325554
4921518K17Rik	0	0	0	0	0	0	0	0	0	0	0
4921524J17Rik	20.1636	25.2063	22.1202	15.5179	15.4546	16.6414	17.0333	18.2122	15.3506	16.6623	16.942
4921524L21Rik	0	0	0	0	0	0	0	0	0	0	0
4921525O09Rik	0.145117	0.153032	0.054942	0.282473	0.315186	0.175008	0.250227	0.407807	0.33332	0.173781	0.271632
4921529L05Rik	0.236474	0.422812	0.296061	0.218065	0.318464	0.376439	0.157009	0.33628	0.292252	0.29134	0.302408
4921530L21Rik	0	0	0	0	0	0	0	0	0	0	0
4921531C22Rik	2.65125	2.64299	2.22857	3.68603	3.77596	3.6071	3.90604	2.98352	3.81417	3.65144	3.49715
4921531P14Rik	0	0.662211	0.720736	0.8204	0.72285	0.988328	0.57032	0.607208	0	0.445228	0
4921533I20Rik	0.296148	0.055791	0.262911	0.380645	0.267619	0.190876	0.317786	0.249421	0.064431	0.184799	0.236917
4921534H16Rik	0	0	0	0.034281	0	0.033629	0	0	0	0	0
4921536K21Rik	0.045706	0.191794	0.170806	0.130066	0.1883	0.236954	0.136559	0.187581	0.269431	0	0.160543
4921539E11Rik	0	0	0.055076	0.059614	0.062079	0.194931	0.064907	0	0.105278	0.103233	0.077423
4922502D21Rik	0	0	0	0	0	0	0	0	0	0	0
4922502H24Rik	0	0	0	0	0	0	0	0	0	0	0
4922502N22Rik	0	0	0	0	0	0	0	0	0	0	0
4930401C15Rik	0	0	0	0	0	0	0	0	0	0	0
4930401O10Rik	0	0	0	0	0	0	0	0	0	0	0
4930401O12Rik	0	0	0	0	0	0	0	0	0	0	0
4930402F06Rik	0	0	0	0	0	0	0	0	0	0	0
4930402F11Rik	0	0	0	0	0	0	0	0	0	0	0
4930402H24Rik	4.53069	4.43646	4.82056	5.2682	4.6621	5.12396	7.26086	8.66757	4.67517	8.45213	6.01409
4930402K13Rik	0	0	0	0	0	0	0	0	0	0.035474	0
4930404A05Rik	0	0	0	0	0	0	0	0	0	0	0
4930404H11Rik	0	0	0	0	0	0	0	0	0	0	0
4930404I05Rik	3.85022	5.2066	3.9864	5.13056	6.20554	5.35118	4.08043	3.66322	4.34285	3.97738	6.1763
4930404N11Rik	3.95535	5.71953	4.42876	4.1955	4.12222	4.46245	4.51848	3.81518	4.01917	5.72199	4.11329
4930405A10Rik	0	0	0	0	0	0	0	0	0	0	0
4930405A21Rik	1.24299	1.06326	0.751361	1.1223	1.53693	1.30874	1.03174	1.524	0.570991	2.12566	0.990529
4930405D11Rik	0	0	0	0	0	0	0	0	0	0	0
4930405J17Rik	0	0	0	0	0	0	0	0	0	0	0
4930405L22Rik	0	0	0	0	0	0	0	0	0	0	0
4930405O22Rik	0	0	0	0	0	0	0	0	0	0	0
4930406D18Rik	0	0	0	0	0	0	0	0	0	0	0
4930407G08Rik	0	0	0	0	0	0	0	0	0	0	0
4930407I10Rik	0	0	0.019235	0.041639	0.024544	0.030634	0.017002	0.022125	0	0	0
4930407I19Rik	0	0	0	0	0	0	0	0	0	0	0
4930412B13Rik	0	0	0	0	0	0	0	0	0	0	0
4930412C18Rik	0.345261	0.519391	0.497657	0.44061	0.616237	0.684705	0.596213	0.585768	0.677746	0.350199	0.727943
4930412O13Rik	0.503256	0.74452	0.744953	1.078	1.14273	0.943982	2.12464	2.05152	1.63449	1.17605	1.55686
4930413E15Rik	0	0	0	0	0	0	0	0	0	0	0
4930413F20Rik	0.32309	0.2053	0.164021	0.22192	0.224029	0.136455	0	0.11592	0.455223	0	0
4930413G21Rik	18.3154	17.746	17.7532	21.3966	21.531	16.4115	24.0366	24.624	25.8342	22.4236	18.2943
4930413M19Rik	0	0	0	0	0	0	0	0	0	0	0
4930414N06Rik	0	0	0	0	0	0	0	0	0	0	0
4930415F15Rik	0	0	0	0	0	0	0	0	0	0	0
4930415L06Rik	0	0	0	0	0	0	0	0	0	0	0
4930415O20Rik	0.435149	0	0	0	0	0	0	0	0.782615	0	0
4930417O13Rik	0	0	0	0	0	0.076503	0	0	0	0	0.130056
4930417O22Rik	0	0	0	0	0	0	0	0	0	0	0
4930419G24Rik	0	0	0	0	0	0	0	0	0	0	0
4930423M02Rik	0	0	0	0	0	0	0	0	0	0	0
4930425K10Rik	0	0	0	0	0	0	0	0	0	0	0
4930425L21Rik	0	0	0	0	0	0	0	0	0	0	0
4930425O10Rik	0.295342	0.31279	0.344671	0.375642	0.465084	0.486275	0.140068	0.326274	0.499813	0.46226	0.366737
4930426D05Rik	1.68806	4.53531	2.7297	3.80607	2.96064	2.62856	4.33915	2.69297	2.45101	2.6893	3.51155
4930426L09Rik	0.28082	0.45053	0.511872	0.486939	0.33446	0.384545	0.347512	0.417444	0.562575	0.255097	0.637732
4930427A07Rik	12.3987	11.6185	13.7573	7.10216	6.70563	6.54563	4.03213	5.91238	4.74137	7.35563	7.3777
4930428D20Rik	0	0	0	0	0	0	0	0	0	0	0
4930428E07Rik	0	0	0	0	0	0	0	0	0	0	0
4930428G15Rik	0.593089	0.345666	0.687249	0.361671	0.142124	0.236525	0.343333	0.620366	0.638716	0.313155	0.344954
4930428O21Rik	0	0.095389	0	0	0.065916	0.219397	0	0	0.110162	0	0
4930429B21Rik	0.691215	0.200274	0.457486	0.347373	0.435738	0.301811	0.44816	0.186196	0.486533	0.676341	0.60748
4930429D17Rik	0	0	0	0	0	0	0	0	0	0	0
4930429F11Rik	0	0	0	0	0	0	0	0	0	0	0
4930429F24Rik	0.607663	0.630691	0.517888	0.765826	0.632488	1.07363	0.365872	0.594565	0.29672	0.661413	0.737603
4930430A15Rik	0	0	0	0	0	0	0	0	0	0	0
4930430F08Rik	7.55357	7.98975	6.60329	6.80013	6.4606	7.02682	7.23908	7.84193	5.92708	6.03996	6.6381
4930430F21Rik	0	0	0	0	0	0	0	0	0	0	0
4930430J02Rik	0	0	0	0	0.209788	0	0	0	0	0	0
4930431F12Rik	0	0	0	0	0	0	0	0	0	0	0
4930431P03Rik	0	0.048896	0.059575	0	0	0	0	0	0	0	0
4930432J09Rik	0	0.035626	0	0	0	0	0	0	0	0	0
4930432K21Rik	4.84402	4.01755	6.15199	9.97272	12.1098	17.8121	3.54164	3.75949	3.9626	14.4977	11.8994
4930432M17Rik	0	0	0	0	0	0	0	0	0	0	0
4930433B08Rik	0	0	0	0	0	0	0	0	0	0	0
4930433I11Rik	0	0	0	0	0	0	0	0	0	0	0
4930433N12Rik	0	0	0	0.076264	0	0.154516	0	0	0	0	0
4930434J06Rik	0	0	0	0	0	0	0	0	0	0	0
4930435E12Rik	0	0	0.063241	0	0	0	0	0	0	0	0
4930438E09Rik	0	0	0	0	0	0	0	0	0	0	0
4930440C22Rik	0	0	0	0	0	0	0	0	0	0	0
4930440I19Rik	0	0	0	0	0	0	0	0	0	0	0
4930441H08Rik	0	0	0	0	0	0	0	0	0	0	0
4930441J16Rik	0	0	0	0	0	0	0	0	0	0	0
4930442J19Rik	0	0	0	0	0	0	0	0	0	0	0
4930442L01Rik	0	0	0	0	0	0	0	0	0	0	0
4930443O20Rik	0	0.115989	0	0	0.103328	0.059364	0.055056	0	0	0.087566	0
4930444F02Rik	0	0	0	0	0.040796	0	0	0	0	0	0
4930444G20Rik	0.006756	0.053553	0.048216	0.084806	0.182504	0.138091	0.029682	0.096566	0.035775	0.181939	0.045038
4930444M15Rik	0	0	0	0.117358	0	0	0.0426	0	0	0.076211	0
4930444P10Rik	0	0.077553	0	0.078481	0.185558	0.051756	0	0.140167	0	0.102786	0.102784
4930445N18Rik	0	0	0	0.109807	0.076712	0	0	0.162802	0	0	0
4930447A16Rik	0	0	0	0	0	0	0	0	0	0	0
4930447C04Rik	20.09	17.2166	22.3592	58.8676	68.8044	123.408	37.6803	28.9681	30.0379	90.1599	64.4132
4930447F24Rik	0.133842	0.083208	0	0.1451	0.171057	0.106753	0.236977	0.115645	0.384373	0	0.106003
4930447J18Rik	0	0	0	0	0	0	0	0	0	0	0
4930447K03Rik	0.224426	0	0	0	0	0	0	0	0	0	0
4930447M23Rik	0.204715	0.094359	0.226946	0.083225	0.19459	0.142361	0.118932	0.15477	0.110233	0.054045	0.081067
4930447N08Rik	0	0	0	0	0	0	0	0	0	0	0
4930448C13Rik	0	0	0	0	0	0	0	0	0	0	0
4930448F12Rik	0	0	0	0	0	0	0	0	0	0	0
4930448H16Rik	0	0	0	0	0	0	0	0	0	0	0
4930448I06Rik	0	0	0	0	0	0	0	0	0	0	0
4930448I18Rik	0	0	0	0	0	0	0	0	0	0	0
4930448K20Rik	0	0	0	0	0	0	0	0	0	0	0
4930449E01Rik	0	0	0	0	0	0	0	0	0	0	0
4930449E18Rik	0	0	0	0	0	0	0	0	0	0	0
4930449I24Rik	0	0	0	0	0	0	0	0	0	0	0
4930451G09Rik	0.760264	0.99144	0.942111	1.44961	2.11288	2.35093	1.44344	0.674699	1.3621	1.24919	1.22996
4930451I11Rik	0	0	0	0	0	0	0	0	0	0	0
4930452A19Rik	0	0	0	0	0	0	0	0	0	0	0
4930452B06Rik	6.33089	5.14548	5.85233	3.49074	4.49564	5.98552	5.13494	5.22034	4.81698	3.78708	6.12842
4930452G13Rik	0	0	0	0	0.067173	0	0	0	0	0	0
4930452N14Rik	0	0	0	0	0	0	0	0	0	0	0
4930453H23Rik	0	0	0	0	0	0	0	0	0	0	0
4930453L07Rik	0	0.077541	0	0.066764	0	0	0	0	0	0	0
4930453N24Rik	24.4746	26.6281	23.6716	19.5069	20.3816	19.6015	20.2307	20.5231	20.265	18.5223	21.1808
4930455B14Rik	0	0	0	0	0	0	0	0	0	0	0
4930455C13Rik	0.723451	0.066123	0.734141	0.052898	0.22259	0.23077	0.292784	1.65946	0	0.32102	1.41445
4930455D15Rik	0	0	0	0	0	0	0	0	0	0	0
4930455F16Rik	0	0	0	0	0	0	0	0	0	0	0.103467
4930455G09Rik	0.913113	0.39739	1.09179	0.571102	1.17698	1.32194	1.45738	1.69934	1.52059	1.62468	1.3345
4930455H04Rik	0	0	0	0	0	0	0	0	0	0	0
4930455J16Rik	0	0	0	0	0	0	0	0	0	0	0
4930456L15Rik	0	0	0	0	0	0	0	0	0	0	0
4930459C07Rik	0	0	0.074469	0	0	0	0	0	0	0	0
4930459L07Rik	0	0	0	0	0	0	0	0	0	0	0
4930461G14Rik	15.5859	12.7532	17.3871	3.45191	5.26388	2.36528	6.54641	8.1803	8.455	2.64117	6.99816
4930463O16Rik	0	0	0	0.041774	0	0	0	0	0	0	0
4930465K10Rik	0	0.088416	0.071223	0.093473	0.060588	0.151249	0.312404	0.203783	0.051055	0.150188	0.187732
4930465M20Rik	0	0	0	0	0	0	0	0	0	0	0
4930467D21Rik	0.079903	0.111768	0.090035	0.259871	0.202672	0.204338	0.106106	0.0863	0.129077	0.168759	0.205671
4930467E23Rik	0	0	0	0	0	0	0	0	0	0	0
4930467K11Rik	0	0	0	0.178778	0	0	0	0	0	0.250188	0
4930469G21Rik	0	0.284578	0.188436	0	0.080149	0	0	0.104975	0	0.13245	0
4930470H14Rik	0	0	0	0	0	0	0	0	0	0	0
4930470O06Rik	0	0	0	0	0	0	0	0	0	0	0
4930470P17Rik	0	0	0	0	0.054812	0	0	0	0	0	0
4930471C04Rik	0	0	0	0	0	0	0	0	0	0	0
4930471G03Rik	0	0	0	0	0	0	0	0	0	0	0
4930471M09Rik	0	0.250857	0	0.167671	0.309426	0	0	0.132488	0	0.170448	0.248848
4930473A02Rik	0.229474	0.242961	0.085852	0.203669	0.269257	0.392358	0.13775	0	0.283101	0.248443	0
4930473O22Rik	0	0	0	0	0	0	0	0	0	0	0
4930474G06Rik	0	0	0	0	0	0	0	0	0	0	0
4930474H20Rik	0	0	0	0	0	0	0	0	0	0	0
4930474M22Rik	0	0	0	0	0	0	0	0	0.268023	0.188032	0
4930474N05Rik	0	0	0	0	0	0	0	0	0	0	0
4930474N09Rik	0	0	0.076432	0.124094	0.065019	0.081154	0	0.175828	0.103488	0	0
4930477N07Rik	0	0	0	0	0	0	0	0	0	0	0
4930478L05Rik	0	0	0	0	0	0	0	0	0	0.067212	0
4930478P22Rik	0	0	0	0	0	0	0	0	0	0	0
4930479D17Rik	0	0	0	0	0	0.566581	0	0	0.174136	0	0.190495
4930480E11Rik	0	0	0	0	0	0	0	0	0	0	0
4930480G23Rik	0	0	0	0	0	0	0	0	0	0	0
4930480K15Rik	0	0	0	0	0	0	0	0	0	0	0
4930480K23Rik	1.31452	1.99844	1.06198	2.45322	1.80339	2.50976	1.92636	2.19454	0.917254	2.62081	2.2969
4930480M12Rik	0	0	0	0	0	0	0	0	0	0	0
4930481A15Rik	2.5236	2.41314	2.51068	3.37882	3.27447	2.96261	3.32048	2.72027	2.95695	3.84209	2.33305
4930482G09Rik	0	0	0	0	0	0	0	0	0.233445	0	0
4930483J18Rik	0	0	0.123241	0.118944	0.069892	0.261712	0.10893	0	0.075582	0.132345	0.171625
4930483K19Rik	0.050134	0.209018	0	0.078143	0	0.84868	0.194386	0.611552	0	0.708695	0.131813
4930483O08Rik	0	0	0	0	0.111353	0	0	0	0	0	0
4930484H19Rik	0	0	0	0	0	0	0	0	0	0	0
4930486F22Rik	0	0	0	0	0	0	0	0	0	0	0
4930486I03Rik	0	0	0	0	0	0	0	0	0	0	0
4930486L24Rik	0.130724	0.162536	0	0	0	0	0	0	0	0	0
4930487D11Rik	0	0	0	0	0	0	0	0	0	0	0
4930487H11Rik	0	0	0	0	0	0	0	0	0	0	0
4930488B22Rik	0	0	0	0	0	0	0	0	0	0	0
4930488L21Rik	0	0	0	0	0	0	0	0	0.034602	0	0
4930500F04Rik	0	0	0	0	0	0	0	0	0	0	0
4930500L23Rik	0	0	0	0	0	0	0	0	0	0	0
4930502A04Rik	0	0	0	0	0	0	0	0	0	0	0
4930502E09Rik	0	0	0	0	0	0.126407	0.105227	0	0	0	0.12395
4930502E18Rik	2.15466	2.67183	2.52155	2.91841	3.56494	3.17711	2.66354	2.865	4.6268	2.63036	3.52433
4930503B20Rik	0	0	0	0	0	0	0	0	0	0	0.395936
4930503E14Rik	0.19494	0.271596	0.090651	0	0	0.120315	0	0.188486	0	0	0.084547
4930503E24Rik	2.40793	0.515843	0.78893	1.74161	1.35946	0.889583	0.828811	1.71601	1.70018	1.79039	1.11172
4930503F20Rik	0	0	0.145159	0	0	0	0	0	0	0	0
4930503H13Rik	0	0	0	0	0	0	0	0	0	0	0
4930503L19Rik	8.80055	6.12613	8.37368	8.23889	7.56617	7.80669	10.4892	12.0588	8.96433	10.2121	9.97887
4930503O07Rik	0	0	0	0	0	0	0	0	0	0	0
4930504C09Rik	0	0	0	0	0	0	0	0	0	0	0
4930504O13Rik	0.591108	0	0	0.244037	0	0	0	0	0	0	0.23771
4930505A04Rik	0	0.361884	0.133342	0.105177	0	0	0.128833	0.223539	0.208964	0	0
4930505G20Rik	0	0	0	0	0	0	0	0	0	0	0
4930505K13Rik	0	0	0	0	0	0	0	0	0	0	0
4930505K14Rik	0	0	0	0	0	0	0	0	0	0	0
4930506A18Rik	0	0	0	0	0	0	0	0	0	0	0
4930506C21Rik	1.75921	1.88062	1.75699	1.46533	1.96703	1.48452	1.61596	1.64434	1.38174	3.0193	1.88566
4930507D05Rik	0.565921	0.934935	0.681189	0.945538	0.682303	1.32238	0.908809	0.603577	1.07776	0.544626	1.6527
4930507D10Rik	0	0	0	0	0	0	0	0	0	0	0
4930509E16Rik	0.1507	0.093686	0.264143	1.05989	0.5128	1.11985	0.423581	0.217017	0.592371	0.897823	0.353089
4930509J09Rik	0	0	0	0	0	0	0	0	0	0	0
4930509K18Rik	0	0	0	0	0	0	0	0	0	0	0
4930511A02Rik	0	0	0	0	0	0	0	0.05343	0	0	0.048976
4930511A08Rik	0	0	0	0	0	0.243464	0	0	0	0	0
4930511E03Rik	0	0	0.060405	0	0	0	0.06229	0	0	0	0
4930511M06Rik	0.518821	0.622632	0.929165	0.111703	0.672162	0.814802	0.667196	0.411206	0.584662	0.838161	0.935934
4930512B01Rik	0	0	0	0	0	0.06399	0	0	0	0	0
4930512J16Rik	0	0	0	0	0	0	0	0	0.069318	0	0
4930512M02Rik	0	0	0	0	0	0	0	0	0	0	0
4930513D17Rik	0	0	0	0	0	0	0	0	0	0	0
4930513N10Rik	2.76248	3.37547	2.67331	3.14378	2.56429	2.00119	3.32723	3.35008	2.39765	3.62341	2.80478
4930513O06Rik	0	0	0	0	0	0	0	0	0	0	0
4930515B02Rik	0	0	0	0	0	0	0	0	0	0	0
4930515G01Rik	1.00191	1.12384	0.783161	1.43873	1.24916	1.03467	1.23996	1.58843	1.2129	1.53655	1.29159
4930515G16Rik	0	0	0	0	0	0	0	0	0	0	0
4930515L03Rik	0	0	0	0	0	0	0	0	0	0	0
4930515L19Rik	0	0	0	0	0	0	0	0	0	0	0
4930517E11Rik	0	0	0	0	0	0	0	0	0	0	0
4930517M08Rik	0	0	0	0	0	0	0	0	0	0	0
4930518J21Rik	0	0	0	0	0	0	0	0	0	0	0
4930518P08Rik	0	0	0	0	0	0	0	0	0	0	0
4930519D14Rik	0	0	0	0	0	0	0	0	0	0	0
4930519F09Rik	1.45601	1.22144	1.78132	1.22556	1.19426	1.18139	0.815677	1.35674	0.907032	1.28403	1.25819
4930519F16Rik	0	0	0	0	0	0	0	0	0	0	0
4930519F24Rik	0	0	0	0	0	0	0	0	0	0	0
4930519G04Rik	0	0	0	0	0	0	0	0	0	0	0
4930519H02Rik	0	0	0	0	0	0	0	0	0	0	0
4930519K11Rik	0	0	0	0	0	0	0	0	0	0	0
4930520O04Rik	2.08816	1.93632	1.67469	2.1537	1.59178	1.52243	2.22657	2.85121	2.09607	1.54305	2.24651
4930520P13Rik	0	0	0	0	0	0	0	0	0	0	0
4930521E06Rik	0	0	0	0	0	0	0	0	0	0	0
4930522H14Rik	0	0	0	0	0	0	0	0	0	0	0
4930522O17Rik	0	0	0	0	0	0	0	0	0	0	0
4930523C07Rik	3.94598	4.41268	3.67434	6.85368	5.78545	5.30949	6.40738	6.38345	6.44008	5.77521	5.80631
4930523O13Rik	0	0	0	0	0	0	0	0	0	0	0
4930524B15Rik	0.602951	0.368805	0.660913	12.4142	13.78	23.125	2.36713	1.07861	2.36725	15.7416	11.5121
4930524B17Rik	0	0	0	0	0	0	0	0	0	0	0
4930524C18Rik	0	0	0	0	0	0	0	0	0	0	0
4930524N10Rik	0	0	0	0	0	0	0	0	0	0	0
4930524O05Rik	0	0	0	0	0	0	0	0	0	0	0
4930524O08Rik	0	0	0	0	0	0	0	0	0	0	0
4930525C09Rik	0	0	0	0	0	0	0	0	0	0	0
4930525D18Rik	0	0	0	0	0.139838	0.152945	0	0	0	0	0.101247
4930525G20Rik	0.502906	0.456673	0.38066	0.589469	0.447799	0.492846	0.511004	0.741588	0.442191	0.618311	0.474357
4930526H09Rik	0	0	0	0	0	0	0	0	0	0	0
4930526I15Rik	10.326	11.4033	14.3388	15.8436	16.3262	12.9753	14.1607	11.6648	13.4792	19.7101	15.4124
4930526L06Rik	0.376857	0.451703	0.355424	0.193466	0.362323	0.144092	0.485857	0.307327	0.393741	0	0.388669
4930527F14Rik	0	0	0	0	0	0	0	0	0	0	0
4930527G23Rik	0	0	0	0	0	0	0	0	0	0	0
4930528A17Rik	0.810222	1.20744	1.15691	1.71185	1.03703	2.48939	1.00663	3.19186	0.554101	3.01158	1.87178
4930528D03Rik	0	0	0	0	0	0	0	0	0	0	0
4930528G23Rik	0	0	0	0	0	0	0	0	0	0	0
4930528H21Rik	0	0	0	0	0	0	0	0	0	0	0
4930528P14Rik	0	0	0	0	0	0	0	0	0	0	0
4930529C04Rik	0.861477	0.736461	0.876688	0.676735	0.581549	0.905339	1.00951	1.0675	0.561828	1.03794	0.938275
4930529K09Rik	0	0	0	0	0	0	0	0	0	0	0
4930529L06Rik	0	0	0	0	0	0	0	0	0	0	0
4930532I03Rik	0	0	0	0	0	0	0	0	0	0	0
4930532M18Rik	0	0	0	0	0	0	0	0	0	0	0
4930533B01Rik	0	0	0	0	0	0	0	0	0	0	0
4930533N22Rik	0	0	0	0	0	0	0	0	0	0	0
4930533P14Rik	0	0	0	0	0	0	0	0	0	0	0
4930538K18Rik	0.119337	0.259663	0.107873	0	0.122613	0.126912	0	0	0	0	0.12602
4930539C22Rik	0	0	0	0	0	0	0	0	0	0	0
4930539E08Rik	0.477295	0.189678	0.459055	0.361871	0.587403	0.558314	0.518374	0.464723	0.439331	0.343813	0.485284
4930539J05Rik	18.6572	14.8956	17.0564	14.1433	14.6089	18.908	18.4404	18.9744	14.7201	21.0474	18.1417
4930539M17Rik	0.243628	0	0	0	0	0	0	0	0	0	0
4930539N22Rik	0	0	0	0	0	0	0	0	0	0	0
4930540M03Rik	0	0	0	0	0	0	0	0	0	0	0
4930542C21Rik	0	0	0	0	0	0.148393	0	0	0	0	0
4930542D17Rik	0	0	0	0	0	0	0	0.075908	0	0	0
4930543E12Rik	0	0	0.155896	0	0.107165	0	0	0	0	0	0.19923
4930543N07Rik	0	0	0	0	0	0	0	0	0	0	0
4930544D05Rik	0	0	0	0	0	0	0	0	0	0	0
4930544G11Rik	0	0	0	0	0	0	0	0	0	0	0
4930544M13Rik	0	0	0	0	0	0	0	0	0	0	0
4930545E07Rik	0	0	0	0	0	0	0	0	0	0	0
4930545H06Rik	0	0	0	0	0	0	0	0	0	0	0
4930545L23Rik	0	0	0	0	0	0	0	0	0	0	0
4930546C10Rik	0	0	0	0	0	0	0	0	0	0	0
4930546K05Rik	0	0	0	0	0.019715	0	0	0	0	0	0
4930547E08Rik	0	0	0.322889	0.790669	0.542546	0.805187	0.852987	0	0.774574	0	0.851206
4930547E14Rik	0	0	0	0	0	0	0	0	0	0	0
4930548G14Rik	0	0	0	0	0	0	0	0	0	0	0
4930548H24Rik	2.39939	2.89438	2.60008	0.305095	0.660235	0.554989	0.54506	1.55407	0.676137	0.641948	0.595199
4930548J01Rik	0	0	0	0	0	0	0	0	0	0	0
4930548K13Rik	0	0	0	0	0	0	0	0	0	0	0
4930549C01Rik	0	0	0	0	0	0	0	0	0	0	0
4930549C15Rik	0	0	0	0	0	0	0	0	0	0	0
4930549G23Rik	0	0	0.31735	0	0	0.497195	0	0.691736	0	0.457047	0
4930550C14Rik	0.578219	0.405914	0.399645	1.3055	0.948289	1.32194	0.704872	0.787319	2.08439	1.43009	1.04293
4930550C17Rik	0	0	0	0	0	0	0	0	0	0	0
4930550L24Rik	7.82958	7.7209	6.95594	5.43101	8.76437	9.45836	6.65845	5.30839	7.92265	7.13277	7.71466
4930552N02Rik	0	0	0	0	0	0	0	0	0	0	0
4930552P12Rik	0.071909	0	0	0	0.030634	0	0	0.062132	0.077441	0	0
4930553C11Rik	0	0	0	0	0	0	0	0	0	0	0
4930553E22Rik	0	0	0	0	0	0	0	0	0	0	0
4930554C24Rik	0	0	0	0	0	0	0	0	0	0	0
4930554G24Rik	0	0	0	0	0	0	0	0	0	0	0
4930554H23Rik	0	0	0	0	0	0	0	0	0	0	0
4930554I06Rik	0	0	0	0	0	0	0	0	0	0	0
4930555B11Rik	0	0	0	0	0	0	0	0	0	0	0
4930555B12Rik	0	0	0	0	0	0	0	0	0	0	0
4930555G01Rik	0	0	0	0	0	0	0	0	0	0	0
4930555G21Rik	0	0	0	0	0	0	0	0	0	0	0
4930555K05Rik	0	0	0	0	0	0	0	0	0	0	0
4930556C24Rik	0	0	0	0	0	0	0	0	0	0	0
4930556G01Rik	0	0	0	0	0	0	0	0	0	0	0
4930556J02Rik	0	0	0	0	0	0	0	0	0	0	0
4930556M19Rik	3.84044	4.73431	3.54905	4.90228	4.52373	4.72744	4.49858	4.12701	4.51507	3.96897	4.44052
4930556N09Rik	0	0	0	0	0	0	0	0	0	0	0
4930556N13Rik	0	0	0	0	0	0	0	0	0	0	0
4930557A04Rik	0	0	0	0	0	0	0	0	0	0	0
4930557F10Rik	0	0	0	0	0	0	0	0	0	0	0
4930557J02Rik	0	0	0	0	0	0	0	0	0	0	0
4930557K07Rik	0	0.425443	0.780291	0	0.707698	1.25022	0.856378	0.833354	0	0	0.857521
4930558C23Rik	0.244529	0.505294	0.298491	0	0	0	0	0	0	0	0.12911
4930558F17Rik	0	0	0	0	0	0	0	0	0	0	0
4930558G05Rik	0	0	0	0	0	0	0	0	0	0	0
4930558J18Rik	1.51285	1.65645	1.76745	0.897865	1.35517	0.773223	1.05549	1.39487	1.87341	1.15291	1.53253
4930558K02Rik	0.11812	0	0	0	0.264185	0.413585	0	0	0	0.310282	0
4930559C10Rik	0	0	0	0	0	0	0	0	0	0	0
4930562C15Rik	0	0	0	0	0	0	0	0.065156	0	0.027609	0
4930562F07Rik	0.069955	0.051718	0.152183	0.13726	0.163969	0.074519	0.107076	0.165261	0.096432	0.052339	0.170033
4930563D23Rik	0	0	0	0	0.014271	0.017812	0	0	0.048101	0	0
4930563E18Rik	4.82411	4.76189	4.75378	6.12893	5.41094	5.00395	4.70778	6.40974	5.5553	4.24059	5.46771
4930563E22Rik	2.29163	2.54156	2.50254	2.59076	2.68781	3.2516	2.49389	2.89576	2.96904	3.37118	3.21623
4930563F08Rik	0	0	0	0	0	0	0	0	0.250216	0	0
4930563H07Rik	0	0	0	0	0	0	0	0	0	0	0
4930563M20Rik	0	0	0	0	0	0	0	0	0	0	0
4930563M21Rik	0	0	0	0	0	0	0.298555	0	0.389745	0.494211	0
4930564B18Rik	0	0	0	0	0	0	0	0	0	0	0
4930564C03Rik	0	0	0	0	0	0.040371	0.033607	0	0	0	0
4930564D02Rik	0	0	0	0	0	0	0	0	0	0	0
4930565D16Rik	0	0	0	0	0	0	0	0	0	0	0
4930565N06Rik	0	0	0	0	0	0	0.148546	0.564242	0	0.896956	0.117674
4930567H12Rik	0	0	0	0.101874	0	0	0	0	0	0	0
4930567H17Rik	0	0	0	0	0	0	0	0	0	0	0
4930567J20Rik	0	0	0	0	0	0	0	0	0	0	0
4930567K12Rik	0	0	0	0	0	0	0	0	0	0	0
4930567K20Rik	0	0	0	0	0	0	0	0	0	0	0
4930568D16Rik	0	0	0	0	0	0	0	0	0	0	0
4930568E12Rik	0	0	0	0	0	0	0	0	0	0	0
4930568G15Rik	0	0	0	0	0	0	0	0	0	0	0
4930570G19Rik	0.132142	0.053576	0.07193	0.031142	0.048951	0.09165	0.11444	0.049641	0.281355	0	0.091006
4930571K23Rik	0	0	0	0	0	0	0.017528	0	0	0	0
4930571O06Rik	0	0	0	0	0	0	0	0	0	0	0
4930572K03Rik	0	0	0	0	0	0	0	0	0	0	0
4930572O03Rik	0	0	0	0	0	0	0	0	0	0	0
4930572O13Rik	0	0	0	0	0	0	0	0	0	0	0
4930573O16Rik	0	0	0	0	0	0	0	0	0	0	0
4930577N17Rik	2.72801	3.6872	2.85461	4.13357	3.26762	2.68485	3.4944	4.71858	3.74208	3.22661	3.08205
4930578C19Rik	0.166281	0.088657	0	0.162239	0.063754	0.159151	0.303787	0.187304	0.143258	0.386309	0.252026
4930578E11Rik	0	0	0	0	0	0	0	0	0	0	0
4930578I06Rik	0	0	0	0	0	0	0	0	0	0	0
4930578M01Rik	0	0	0.134573	0	0.084303	0.157835	0	0.113988	0	0	0
4930578N18Rik	0	0	0	0	0	0	0	0	0	0	0
4930579F01Rik	0	0	0	0	0	0	0	0	0	0	0
4930579G18Rik	1.4461	1.21203	1.15851	2.03109	1.35859	2.43678	3.15893	4.53837	1.23217	4.2341	2.10724
4930579G24Rik	7.61674	7.55314	7.74447	8.25343	9.30682	10.5713	6.4888	6.13876	6.28148	8.13757	9.65357
4930579H20Rik	0	0	0	0	0	0	0	0	0	0	0
4930579J19Rik	0	0	0	0	0	0	0	0	0	0	0
4930579K19Rik	1.71252	2.26649	1.94085	1.98886	1.82113	1.89612	1.54824	2.23018	2.85099	1.2038	2.91725
4930579P08Rik	0	0	0	0	0	0	0	0	0	0	0
4930581F22Rik	2.25597	3.18996	3.27557	3.86901	3.35515	3.77732	3.43018	3.91345	3.99389	3.79969	3.54088
4930583K01Rik	0	0	0.098499	0.165271	0	0.216167	0	0.292716	0	0	0.214647
4930583P06Rik	0	0	0	0	0	0	0	0	0	0	0
4930584F24Rik	0	0	0	0	0	0	0	0	0	0	0
4930586N03Rik	0	0	0	0	0	0	0	0	0	0	0
4930587E11Rik	0	0	0	0	0	0	0	0	0	0	0
4930590J08Rik	0	0	0	0	0	0	0	0	0	0	0
4930590L20Rik	0	0	0	0	0	0	0	0	0	0	0
4930591A17Rik	0	0.21761	0.183436	0	0	0	0	0.140663	0	0	0
4930591E09Rik	0	0	0	0	0	0	0	0	0	0	0
4930592A05Rik	0.22747	0.483065	0.179323	0.08611	0.080325	0.244249	0.039486	0.10277	0.124891	0.025122	0.089492
4930592I03Rik	0	0	0	0	0.116205	0	0	0	0	0	0
4930593A02Rik	0	0	0	0	0	0	0	0	0	0	0
4930593C16Rik	0	0	0	0	0	0	0	0	0	0	0
4930594C11Rik	1.1382	1.08291	1.1731	0.7076	0.687261	0.740466	0.67335	1.05099	0.864434	0.824425	0.702152
4930594O21Rik	0	0	0	0	0	0	0	0	0	0	0
4930595D18Rik	0	0	0	0	0	0	0.125474	0	0	0	0.347557
4930595M18Rik	0	0	0	0	0	0	0	0	0	0	0
4930596D02Rik	0	0	0	0	0	0	0	0	0	0	0
4930596I21Rik	0	0	0	0	0	0	0	0	0	0	0
4930597A21Rik	0	0	0	0	0	0	0	0	0	0	0
4930597G03Rik	0	0	0	0	0	0	0	0	0	0	0
4930598F16Rik	0	0	0	0	0	0	0	0	0	0	0
4930599N23Rik	0.271945	0.794029	0.507786	1.41329	1.02629	1.61839	1.08948	1.10199	0.80172	3.38665	1.28219
4931402G19Rik	0.388166	0.381754	0.314973	0.251529	0.443567	0.602299	0.546179	0.46231	0.125878	0.271474	0.645301
4931403E22Rik	0.447813	0.307744	0.127268	0.216644	0.293455	0.699354	0	0	0	0.953643	0.622257
4931403G20Rik	0	0	0	0	0.112238	0	0	0.055825	0	0	0
4931406B18Rik	0	0	0	0	0	0	0	0	0	0	0
4931406C07Rik	16.0884	16.1314	14.9338	23.2145	22.7888	26.6648	27.3017	24.5547	21.2426	25.7725	22.9332
4931406H21Rik	0.155075	0.21583	0.174736	0.277393	0.237335	0.291595	0.463336	0.674641	0.266791	0.588313	0.359858
4931406P16Rik	13.1988	12.9591	14.9315	18.2727	17.8228	20.8124	14.6013	16.9347	15.3971	21.2504	19.3478
4931408C20Rik	0	0	0	0	0	0	0	0	0	0	0
4931408D14Rik	0.055396	0.03342	0.083226	0.029277	0.057819	0.088368	0.02452	0	0.059658	0.038999	0.043874
4931409K22Rik	0	0	0	0	0	0	0	0	0	0	0.038792
4931414P19Rik	4.09807	4.82076	4.76675	4.58345	4.69658	4.0591	4.89464	4.37453	5.0561	4.54625	4.43119
4931417E11Rik	0	0	0	0	0	0	0	0	0	0	0
4931419H13Rik	0	0	0	0	0	0	0	0	0	0	0
4931420L22Rik	0	0	0	0	0	0	0	0	0	0	0
4931423N10Rik	0	0	0	0.052817	0.083021	0.051812	0	0.038846	0.052467	0	0
4931428F04Rik	4.74963	5.11698	5.36822	6.93322	6.11258	6.30241	6.67122	5.99954	7.04392	5.4277	5.63922
4931428L18Rik	0	0	0	0	0	0	0	0	0	0	0
4931429I11Rik	0	0	0	0	0	0	0	0	0	0	0
4931429L15Rik	0	0	0.105793	0	0	0	0	0	0	0	0
4931429P17Rik	0	0	0	0	0	0	0	0	0	0	0
4931430N09Rik	0	0	0	0	0	0	0	0	0	0	0
4931431B13Rik	0	0	0	0	0	0	0	0	0	0	0
4931431C16Rik	0	0	0	0.071144	0	0	0.111835	0.071717	0	0.184224	0.152025
4931431F19Rik	0	0.029194	0	0	0	0	0	0	0	0	0
4931440F15Rik	0.373468	0.468613	0.437718	0.494396	0.466797	0.550393	0.671104	0.716233	0.520521	0.674679	0.476512
4931440J10Rik	0.125565	0.313079	0.188414	0.764339	0.464616	0.300448	0.222914	0	0	0.330904	0.290143
4931440P22Rik	1.02744	1.01813	1.27344	1.42625	1.36371	1.76168	1.77355	1.82345	1.35082	1.97703	1.1298
4932411E22Rik	0	0	0	0.091266	0.028692	0.035812	0.074155	0.077589	0.096707	0	0.05334
4932411N23Rik	0	0	0	0	0	0	0	0	0	0	0
4932412D23Rik	0	0	0	0	0	0	0	0	0	0	0
4932413F04Rik	0	0	0	0	0	0	0	0	0	0	0
4932414J04Rik	0	0	0	0	0	0	0	0	0	0	0
4932414N04Rik	0	0	0	0	0	0	0	0	0	0	0
4932415M13Rik	0	0	0	0	0	0	0	0	0	0	0
4932416H05Rik	2.88613	3.26509	3.14731	2.90248	3.13134	3.07605	3.01129	2.71529	2.75779	3.3245	3.19185
4932416K20Rik	0	0	0.006319	0	0	0	0	0	0	0	0
4932418E24Rik	0.246669	0.210965	0.399274	0.693269	0.230821	0.559589	1.01635	2.9114	0.245683	2.94563	0.551493
4932429P05Rik	0	0	0	0	0	0	0	0	0	0	0
4932435O22Rik	0.420747	0.777626	0.59921	1.25941	0.891736	0.899639	1.52283	1.54805	1.07621	1.28141	0.955817
4932438A13Rik	5.63955	5.83196	6.25493	11.4224	11.0667	16.482	12.3754	12.6104	9.03937	19.9426	15.2407
4932438H23Rik	0.131597	0.083146	0.098778	0.072496	0.071221	0.088896	0.0444	0.152634	0.072016	0.141235	0.070617
4932441J04Rik	0.164815	0	0	0	0	0	0	0	0	0	0
4932443I19Rik	0	0.212519	0.287721	0.124571	0.489517	0.216699	0.19477	0.185673	0.247492	0	0.242682
4932702P03Rik	0.045089	0.039622	0	0.035469	0	0	0.105557	0.152851	0.043009	0.044729	0.101492
4933400A11Rik	0	0	0	0	0	0	0	0	0	0	0
4933400B14Rik	0	0	0	0	0	0	0	0	0	0	0
4933400C23Rik	0	0	0	0	0	0	0	0.09004	0	0	0
4933400F21Rik	0.049705	0	0	0	0	0	0	0.028632	0	0	0
4933400L20Rik	0	0	0	0	0	0	0	0	0	0	0
4933401B06Rik	0	0	0	0	0.031363	0	0	0	0	0	0
4933401D09Rik	0.270919	0.501063	0.236581	0	0.143548	0.144057	0.571663	0.260278	0.237149	0.19073	0.243248
4933401H06Rik	0	0	0	0	0	0	0	0	0	0	0
4933402C06Rik	0	0	0	0	0	0	0	0	0	0	0
4933402D24Rik	0.238493	0	0.07678	0.193914	0.261262	0.216719	0.135729	0.353259	0.110075	0.431749	0.269837
4933402E13Rik	1.18061	0.877215	0.751695	0.123464	0.194068	0.144732	0.100821	0.314884	0.291083	0.128282	0.09621
4933402J07Rik	0	0	0	0	0	0	0	0	0	0	0
4933402J10Rik	0	0	0	0	0	0	0	0	0	0	0
4933402J15Rik	0	0	0	0	0	0	0	0	0	0	0
4933402N03Rik	0	0	0	0	0	0	0	0	0	0	0
4933402N22Rik	0	0	0	0	0	0	0	0	0	0	0
4933402P03Rik	0.074091	0.069091	0	0	0.071017	0	0.049193	0.064017	0	0	0
4933403O08Rik	0	0	0.059135	0.51125	0.301825	1.05695	0.156803	0.476124	0.380019	1.15967	0.431393
4933404G15Rik	0	0	0	0	0	0	0	0	0	0	0
4933404K08Rik	0	0	0	0	0	0	0	0	0	0	0
4933404K13Rik	0.215985	0.335684	0.270409	0	0	0	0	0	0.230663	0	0.11404
4933404O12Rik	1.06884	1.46117	1.6158	2.90102	2.72049	2.82046	1.66456	1.74958	1.92967	3.48243	2.82988
4933405D12Rik	0	0	0	0	0	0.298581	0	0	0	0	0.217322
4933405E24Rik	0	0	0	0	0	0	0	0	0	0	0
4933405L10Rik	0	0	0.06216	0.421094	0.204081	0.331267	0.141364	0.390283	0	0	0.471245
4933405O20Rik	0	0	0	0	0.028552	0	0	0	0	0	0.070774
4933406C10Rik	0.36128	1.07477	0.298639	1.18732	1.30761	1.11493	1.49595	1.67122	0.655803	1.74842	0.897327
4933406D12Rik	0	0	0	0	0	0	0	0	0	0	0
4933406F09Rik	0	0	0	0	0	0	0	0	0	0	0
4933406G16Rik	0	0	0	0	0	0	0	0	0	0	0
4933406I18Rik	0	0	0	0	0	0.228321	0	0	0	0	0.08464
4933406J08Rik	0.991936	1.18796	1.05786	3.67439	4.24863	7.32498	0.82702	0.658718	0.970765	5.2632	4.21367
4933406J10Rik	0	0	0	0	0	0	0	0	0	0	0
4933406K04Rik	0	0	0	0	0	0	0	0	0	0	0
4933406M09Rik	0.135204	0.063041	0	0	0	0	0	0	0.072803	0	0
4933407E24Rik	0	0	0	0	0	0	0	0	0	0	0
4933407G14Rik	0	0	0	0	0	0	0	0	0	0	0
4933407I05Rik	0	0	0	0	0	0	0	0	0	0	0
4933407K13Rik	4.32085	5.51616	4.66666	5.81383	5.88109	5.52936	6.40709	6.99224	5.17979	6.48279	5.26695
4933407L21Rik	0.207157	0.384251	0.495435	0.367756	0.511519	0.373064	0.315425	0.267923	0.835546	0.27517	0.647605
4933408B17Rik	0.656663	0.989009	0.696249	1.14831	1.12534	1.12565	1.5358	0.814926	1.2053	0.874294	0.699618
4933408J17Rik	0	0	1.63416	1.01315	1.56328	1.84298	1.03967	1.00197	0	1.43517	1.98709
4933408N05Rik	0	0	0	0	0	0.055497	0	0	0	0	0
4933409G03Rik	0	0	0	0	0	0	0	0	0	0	0
4933409K07Rik	0.134459	0	0	0	0.151757	0	0	0	0.170385	0.188951	0
4933411E08Rik	0.421323	0.196446	0.263744	0.228379	0.358979	0.529977	0.464488	0.450498	0.264679	0.407847	0.139036
4933411G06Rik	0	0	0	0	0	0	0	0	0	0	0
4933411K16Rik	0.042704	0.039822	0.020851	0.173607	0.109154	0.102182	0.028353	0.29518	0.137967	0.31567	0
4933412E12Rik	0.416435	0.257271	0.414489	0.395027	0.354815	0.415188	0.414744	0.359815	0.335205	0.293175	0.356613
4933412E24Rik	0	0.031826	0	0.027749	0.021809	0.027221	0	0	0.036754	0	0
4933412O06Rik	0	0	0	0	0	0	0	0	0	0	0
4933413G19Rik	0	0.23504	0.115562	0.356371	0.140041	0.336299	0.204321	0.178025	0.389217	0	0.501681
4933413J09Rik	4.11588	5.0414	4.80876	4.1374	4.29243	4.75216	5.21891	5.94846	4.8137	5.81001	4.60157
4933413L06Rik	0	0	0	0	0	0	0	0	0	0	0
4933415F23Rik	0.613236	0.524343	0.535528	0.333407	0.485722	0.393525	0.507839	0.406069	0.518068	0.374978	0.310732
4933416C03Rik	1.11414	0.720278	0.855872	3.72821	3.66835	6.10777	1.59757	1.6438	2.10171	4.54924	3.35563
4933416E03Rik	0	0	0	0	0	0	0	0	0	0	0
4933416I08Rik	0.510855	0.132624	0.296542	0.469402	0.209029	0.182938	0.23694	0.25344	0.092632	0.150188	0.314514
4933416M06Rik	0	0.086834	0.104923	0	0	0	0	0	0	0	0
4933416M07Rik	0.585302	0.836859	0.586906	0	0.35213	0.219759	0.705611	0.509283	0.463094	0.415652	0.18704
4933417A18Rik	0	0	0	0	0	0	0	0	0	0	0
4933417D19Rik	0.387007	0.796666	0.470894	0.616438	0.836796	1.26376	0.804809	0.77644	1.15335	1.34214	0.677458
4933417E11Rik	0	0	0.082236	0	0.139039	0.130977	0	0	0	0	0.130056
4933417G07Rik	0.863799	0.37155	0.50624	0.202475	0.059674	0.217243	0.287281	0.174149	0.330198	0.3583	0.219414
4933417O13Rik	0.152902	0.142584	0.117803	0.126712	0.07516	0.03127	0.129504	0.370933	0.206886	0.041401	0.186305
4933421I07Rik	0	0	0	0	0	0	0	0	0	0	0
4933421O10Rik	2.38626	2.53562	2.22229	3.07655	2.70559	2.80482	3.25699	3.58439	3.23087	3.12812	3.26425
4933422A05Rik	0	0.118349	0.132572	0.071747	0.27949	0.105573	0.087884	0.076244	0	0	0.209661
4933424G05Rik	0	0	0	0	0	0	0	0.059247	0	0	0
4933424G06Rik	0	0	0	0	0	0	0	0	0	0	0
4933425B07Rik	0	0.057934	0	0	0	0	0	0	0	0	0
4933425L06Rik	0	0.129324	0.145848	0.045105	0.088179	0.396687	0.165743	0.095862	0.388316	0.175009	0.084903
4933427D06Rik	0.319569	0.2549	0.550415	9.9088	9.11785	13.8407	0.321303	0.29387	0.343539	9.71852	7.27489
4933427D14Rik	7.52793	7.85562	7.31656	8.9352	8.70244	9.43514	10.34	9.63662	7.86387	10.3095	8.70622
4933427E11Rik	0.394252	0.227482	0.288754	0.517902	0.913268	0.157229	0.32721	0.339585	0.368857	0.520421	0.931862
4933427E13Rik	0	0	0	0	0	0	0	0	0	0	0
4933427G17Rik	0.063545	0.118515	0.143203	1.05472	1.30682	2.45047	0.590681	0.329432	0.340459	1.74889	1.59072
4933427I22Rik	0	0	0	0	0	0.103888	0	0	0	0	0
4933428C19Rik	0	0	0	0	0	0	0	0	0	0	0
4933428G20Rik	0.565439	0.328424	0.26115	0.743777	0.36393	0.467064	0.390326	0.994652	0.439345	0.640147	0.744293
4933429K18Rik	0	0	0	0	0	0	0	0	0	0	0
4933429O19Rik	0	0	0	0	0	0	0	0	0	0	0
4933430H16Rik	0	0	0	0	0	0	0	0	0	0	0
4933430I17Rik	0.234044	0.469354	0.352881	0.217578	0.541946	0.612879	0.329076	0.85233	0.325224	0.706025	0.291662
4933430M04Rik	0	0	0	0	0	0	0	0	0	0	0
4933430N04Rik	0	0	0	0	0	0	0	0	0	0	0
4933431E20Rik	3.16186	3.35174	3.48272	4.90497	4.3833	3.93256	5.18078	4.76862	4.35419	4.94691	4.5124
4933431G14Rik	0.1433	0	0	0	0.045786	0.057148	0.26165	0.400857	0.077162	0.410658	0
4933432G23Rik	0	0	0	0	0	0	0	0	0	0	0
4933432I03Rik	0	0.105167	0	0	0	0	0	0	0	0	0.088348
4933432I09Rik	0.118942	0	0	0	0	0	0.105297	0	0	0	0.157003
4933432K03Rik	0	0	0	0	0	0	0	0	0	0	0
4933433C11Rik	0	0	0	0	0	0	0	0	0	0	0
4933433F19Rik	0	0	0	0	0	0	0	0	0	0	0
4933433G08Rik	0	0	0	0	0	0	0	0	0	0	0
4933433G15Rik	0.598388	0.435486	0.587057	0.734155	1.50058	1.02151	0.87354	1.63229	0.391166	1.71423	0.784566
4933433G19Rik	0	0	0	0	0	0	0	0	0	0.301331	0
4933433H22Rik	0	0	0	0	0	0	0	0	0	0	0
4933434E20Rik	27.8869	27.7158	28.4222	23.7716	26.2401	23.7277	26.3546	26.7153	23.0332	41.6691	22.7032
4933436E23Rik	0	0	0	0	0	0	0	0	0	0	0
4933436H12Rik	0	0	0	0	0	0	0	0	0	0	0
4933436I01Rik	0	0	0	0	0	0	0	0	0	0	0
4933438B17Rik	0	0	0	0	0	0	0.068312	0	0	0	0
4933438K21Rik	0	0	0	0	0	0	0	0	0	0	0
4933439C10Rik	12.3227	15.5344	15.3029	18.5995	19.3351	18.9537	20.3696	15.3302	18.4806	18.0207	17.8294
4933439K11Rik	0.445054	0.770753	0.699971	1.28925	0.770826	0.651181	1.10414	1.30888	0.479292	0.872826	0.593838
4933440J02Rik	0	0	0	0	0	0	0	0	0	0	0
4933440M02Rik	0	0	0	0	0	0	0	0	0	0	0
5031410I06Rik	0	0	0	0	0	0	0.211624	0.276781	0.259233	0	0
5031414D18Rik	0.132351	0	0	0.091748	0	0.036	0	0	0	0.047068	0
5031425E22Rik	6.66895	7.27568	5.66232	7.67979	7.18713	7.39357	8.17128	8.94738	7.72863	8.41603	7.14986
5031425F14Rik	0	0	0	0	0.046738	0	0	0	0	0	0
5031426D15Rik	0.079492	0.149646	0.100021	0.057969	0.09334	0.128589	0.057398	0.029084	0.184503	0.015477	0.093847
5031434C07Rik	0.084115	0	0.106196	0.157665	0	0.045103	0.168955	0.048859	0.060898	0.059715	0
5031434O11Rik	1.23739	0	0.921686	1.16061	0.763586	0.515739	0.807443	0	0.987097	0.343173	0
5031439G07Rik	8.54484	8.45425	8.49026	9.79418	8.59217	9.78975	10.4864	11.1116	10.2796	11.9285	9.48135
5033403F01Rik	0.245631	0.613723	0.262435	0.177535	0.441613	0.713058	0.573726	0.742561	1.07738	0.645626	0.726316
5033403H07Rik	0	0	0	0	0	0	0	0	0	0	0
5033404E19Rik	0.084383	0.05705	0.063387	0	0	0.067304	0	0	0	0	0.193811
5033406O09Rik	1.1713	0.865577	1.05057	1.48143	0.904372	0.633845	1.12741	0.769124	1.67368	0.873327	0.929033
5033428I22Rik	0.36462	0.293018	0.283248	0.23604	0.080318	0	0.281118	0.159679	0.404382	0.330165	0.194079
5330411J11Rik	0	0.135744	0.082011	0.059179	0.04651	0.086352	0.095442	0.094332	0.232209	0	0
5330413P13Rik	0	0	0.024445	0	0	0	0	0	0	0	0
5330417C22Rik	0	0	0	0	0	0	0.059716	0	0	0	0
5330426P16Rik	1.24546	1.28872	1.02542	0.932022	0.778107	0.945833	1.10696	1.27386	0.922085	0.970313	0.625906
5330434G04Rik	0	0	0	0	0	0	0	0	0	0	0
5330439B14Rik	0	0	0	0	0	0	0	0	0	0	0
5430401F13Rik	0	0	0	0	0	0	0	0	0	0	0
5430402E10Rik	0	0	0	0	0	0	0	0	0	0	0
5430402O13Rik	0.968911	0.434114	0.617115	1.16055	1.02972	1.3519	1.00374	0.406822	0.745786	1.35249	1.13259
5430403N17Rik	0	0.06556	0	0.038108	0	0	0	0	0	0	0
5430405H02Rik	2.59538	1.88079	2.19747	1.79738	2.42521	2.25752	1.80895	2.08229	1.97894	2.21884	1.9896
5430416N02Rik	21.8262	24.4903	17.828	17.6152	19.2834	14.1014	21.9906	17.685	20.4225	10.255	9.82799
5430416O09Rik	0	0.027308	0	0	0.046784	0.046714	0.068053	0.063257	0.06268	0	0.046386
5430419D17Rik	0	0	0	0	0	0	0	0	0	0	0
5430421F17Rik	0.031283	0	0.058748	0	0.049976	0.041585	0	0	0	0	0.06194
5430421N21Rik	0	0	0	0	0	0	0	0	0	0	0
5430425K12Rik	0	0	0	0	0	0	0	0	0	0	0
5430427M07Rik	0	0	0	0	0	0	0	0	0	0	0
5430427O19Rik	0.093602	0.072374	0.093751	0.063422	0.069534	0.087101	0.031075	0.040439	0.066782	0.049423	0.02471
5430428K19Rik	0	0	0	0	0	0	0	0	0	0	0
5430431A17Rik	0	0.131231	0.169592	2.72777	0.13946	0	0.149899	0	0	0.635765	0
5430434I15Rik	0	0	0	0	0	0	0	0	0	0	0
5430437J10Rik	0	0	0	0	0	0	0	0	0	0	0
5430440P10Rik	0	0	0	0.143636	0	0	0	0	0	0	0.093274
5530400C23Rik	0	0	0	0	0	0	0	0	0	0	0
5530401A14Rik	0	0	0	0	0	0	0	0	0	0	0
5530601H04Rik	3.46363	1.92343	3.34268	3.39645	3.69443	3.8166	4.07649	5.08811	2.98977	4.07391	4.43839
5730403I07Rik	0	0.054938	0	0	0	0.070486	0.039117	0	0	0	0.093321
5730405O15Rik	1.87411	1.77197	1.61281	1.9139	2.27984	2.21842	1.6111	2.1187	2.61492	1.28508	1.54918
5730408K05Rik	0	0	0	10.7481	0	0	0	0	14.8773	0	0
5730409E04Rik	6.18658	6.39625	6.14588	6.14931	6.20907	5.31848	6.38117	5.86372	6.36868	6.33396	5.42005
5730412P04Rik	0	0	0	0	0	0	0	0	0	0	0
5730416F02Rik	0.330637	0.411387	0.269818	0.209676	0.187154	0.058767	0.146761	0.190985	0.19837	0.155613	0.29177
5730420D15Rik	0.30243	0.261788	0.334354	0	0.184185	0	0	0.262404	0.218039	0.252483	0.159348
5730422E09Rik	0.13954	0	0.092374	0.107758	0.225808	0.110881	0.106672	0.183363	0.053516	0.250276	0.032234
5730435O14Rik	0	0	0	0	0	0.196237	0	0	0	0	0
5730455P16Rik	7.08871	7.28685	6.87675	8.35074	7.80924	8.49234	8.82282	9.87691	8.04138	9.56907	8.71197
5730457N03Rik	0.28724	0.205468	0.431157	0.887187	1.12655	2.04029	0.367127	0.554587	0.462901	1.14949	0.82734
5730460C07Rik	0.096233	0.091261	0	0.204752	0.082341	0.052039	0.151075	0	0	0	0
5730480H06Rik	2.90046	3.03721	2.69433	2.95543	2.88083	3.68765	3.10793	2.8898	3.21458	2.54693	3.03462
5730488B01Rik	0	0	0	0	0	0	0	0	0	0	0
5730507C01Rik	1.48718	1.43643	2.03563	1.71462	1.6701	1.96168	1.68011	1.40601	1.47527	1.6656	1.9216
5730508B09Rik	7.46269	7.6609	6.3397	8.58945	10.6114	12.3003	5.72494	5.91669	7.06103	8.95662	10.0782
5730522E02Rik	0.157442	0	0.118268	0.160016	0.125761	0.248313	0.156149	0.203203	0.211943	0.374087	0.152749
5730559C18Rik	1.39337	1.36606	1.69521	1.35456	1.37011	1.02905	1.32053	1.53789	1.50835	0.824156	1.44604
5830411N06Rik	0.250182	0.213146	0.090752	0.083957	0.32352	0.18889	0.23705	0.219436	0.196263	0.254259	0.140671
5830415F09Rik	13.5961	11.4476	13.2712	9.18244	9.15658	11.5045	8.25453	9.72631	9.61022	8.58729	9.82694
5830416I19Rik	0.045496	0	0.037594	0	0	0	0	0	0	0	0
5830416P10Rik	0.078007	0.157083	0.15987	0.147074	0.057795	0.189361	0.132891	0.269389	0.121751	0.122324	0.142813
5830417I10Rik	8.31778	7.04211	8.48349	9.16839	8.6941	10.249	8.4552	9.02643	6.22926	11.6393	9.01718
5830418P13Rik	0.473853	0.256156	0.493681	0.462884	0.29753	0.496773	0.200623	0.094938	0.23666	0.405384	0.30309
5830428M24Rik	0.101917	0	0	0.093819	0.107453	0	0	0	0	0	0
5830432E09Rik	0.157178	0.48266	0.416631	0.121747	0	0	0.207747	0.339107	0	0.243082	0
5830444B04Rik	0.129732	0.060488	0.259874	0.227665	0.165802	0.469364	0.610402	0.190091	0	0.045666	0.102747
5830454E08Rik	2.57469	2.86837	1.99154	3.20806	2.72327	3.33647	3.44705	1.66978	3.8112	1.94724	2.66572
5830473C10Rik	0	0	0	0	0	0	0	0	0	0	0
5930403L14Rik	0.073771	0.07862	0.031666	0.017138	0.040407	0.05884	0.055803	0.072392	0.115764	0.055645	0.041733
5930412G12Rik	0.842967	0.463376	0.96524	0.781983	0.667746	0.215126	0.955958	0.984786	1.373	0.767121	0.391675
5930430L01Rik	0.56584	0.456405	0.63071	0.822139	0.539171	0.514055	0.645192	0.85443	0.617223	0.866057	0.621277
5930438M14Rik	0	0	0	0	0	0	0	0	0	0	0
6030407O03Rik	0.325124	0.309776	0.577683	0.567208	0.357962	0.184796	0.900275	0.538248	0.383685	0.241175	0.373525
6030408B16Rik	11.9298	8.88622	9.09921	10.7126	9.63362	8.26287	10.05	10.2281	9.81444	9.19387	9.13162
6030419C18Rik	15.5048	17.2301	14.4085	14.7265	14.6618	11.9435	14.3391	12.4387	15.3477	13.0758	12.2003
6030440G07Rik	0	0.183756	0.156249	0	0.191572	0.25322	0.187623	0.293229	0	0.161849	0
6030443J06Rik	0.28814	0.294985	0.355981	0.305858	0.241635	0.351906	0.269056	0.580067	0.391702	0.681186	0.419123
6030458C11Rik	19.0063	17.8004	19.5489	17.2194	15.5743	18.1922	17.4397	16.0934	15.7835	15.7862	20.2622
6030466F02Rik	0.866077	1.008	0.997321	1.27286	0.658445	1.29088	1.29029	0.87164	1.0027	0.832696	1.17633
6030468B19Rik	3.07793	1.92967	0.753269	1.82688	1.94689	1.82332	1.86838	5.51709	5.07165	0	2.52591
6030469F06Rik	0.741822	0.464623	0.834369	0.529222	0.883393	1.07199	0.76489	0.758978	0.576896	0.486617	0.603886
6030471H07Rik	0.364198	0	0.501136	0	0	0.485936	0	0.62906	0	0	0
6030498E09Rik	0.760513	1.33348	0.644807	1.06616	0.578797	0.482446	0.691441	1.15644	0.871363	0.506927	0.860426
6230400D17Rik	2.91088	2.74288	2.668	3.00906	3.10095	2.34532	2.81203	3.15195	2.65592	2.05174	2.85512
6330403A02Rik	4.40146	5.77593	6.23704	7.25714	7.06355	6.92147	8.15616	9.28774	6.88953	8.64117	6.34623
6330403K07Rik	23.7486	32.8486	26.7282	32.0057	30.8506	30.064	32.008	27.8968	41.1561	25.0354	27.5791
6330407A03Rik	0	0	0	0	0	0	0	0.028049	0	0	0
6330408A02Rik	3.94037	4.38718	4.45238	11.2466	10.6384	17.872	5.90825	4.51345	5.93307	13.3437	9.29006
6330409D20Rik	0.148711	0.421607	0.151492	0.201939	0.102589	0	0	0.231187	0	0	0.127148
6330410L21Rik	0	0	0	0	0	0	0	0	0	0	0
6330415B21Rik	0	0	0.020253	0	0	0.021505	0.017901	0.023296	0	0	0
6330415G19Rik	1.44919	4.77592	3.22355	4.0357	3.42433	3.41625	3.04267	2.71265	2.09785	2.18723	2.18523
6330416G13Rik	2.74484	2.8979	2.59083	2.67175	2.85666	2.16477	2.60051	2.81395	2.71167	2.20648	2.7316
6330418K02Rik	2.30494	2.23739	2.47555	2.45232	2.90715	3.19595	2.18842	1.86705	3.09765	2.40172	2.82241
6330549D23Rik	3.38002	3.86011	3.59867	3.56515	3.27019	3.22121	3.62082	4.38689	4.05616	3.56975	3.40975
6430411K18Rik	0	0	0	0	0	0	0	0	0	0	0
6430503K07Rik	0	0.202507	0	0	0	0	0	0	0	0	0
6430531B16Rik	0.876981	0.919043	0.650483	1.39642	1.06316	0.98717	1.23999	1.19221	1.11763	0.579556	1.42388
6430548M08Rik	1.86194	1.62693	1.66076	3.50027	3.23939	4.72896	1.90924	2.1412	2.0515	4.29224	2.87495
6430550D23Rik	0.653816	0.671263	0.934785	1.45894	1.42144	1.39106	1.33604	1.10226	0.92879	1.20801	1.3147
6430562O15Rik	0.651081	0.402888	1.08114	0.825666	0.519724	0.550834	1.11167	1.24496	0.451157	0.877898	0.877902
6430571L13Rik	0.656418	0.709459	0.643477	0.569936	0.77274	0.430069	0.528062	0.519766	0.7511	0.470378	0.538448
6430573F11Rik	2.48713	2.56178	3.298	2.08804	2.25826	2.25365	2.60284	2.04537	2.49592	2.09077	3.2396
6430584L05Rik	0.170882	0.12394	0.09984	0.077189	0.15773	0.106009	0.100852	0.065622	0.160004	0.160404	0.180452
6430706D22Rik	0	0	0	0	0	0	0	0	0	0	0
6430710C18Rik	2.89831	2.9141	3.64716	2.43297	3.11557	2.6189	3.63139	2.74213	3.86034	1.81604	3.33667
6530402F18Rik	0.333152	0.110461	0.125391	0.11679	0.053445	0.099229	0.120318	0.20475	0.087651	0.411798	0.109232
6530403H02Rik	0	0	0	0	0	0	0	0	0	0	0
6530411M01Rik	0	0.362707	0.110603	0	0.090522	0.156584	0.21799	0.335364	0.519302	0.259143	0.183459
6720468P15Rik	4.10963	4.72877	3.3859	3.60512	4.3147	3.28415	3.52965	2.7849	3.99431	2.89875	3.05572
6720483E21Rik	0.607666	0.800745	0.422915	1.27286	1.38976	0.710485	1.3464	1.32758	1.50434	0.709334	0.718156
6720489N17Rik	5.35306	6.35043	6.28446	5.91539	5.34715	5.56595	6.23113	5.52174	4.85718	5.97764	5.49404
6820408C15Rik	0	0.258739	0.155669	0.613333	0.487076	0.574702	0.664357	0.179803	0.577074	0	0.383188
6820431F20Rik	0	0	0	0	0.42368	0	0	0	0	0	0
7420426K07Rik	0.198896	0	0.119527	0.258749	0.076259	0.031728	0.290529	0.068741	0.171358	0.042008	0.031505
7420461P10Rik	0.156752	0	0	0	0	0	0	0	0	0	0
7420700N18Rik	0	0	0	0	0	0	0	0	0	0	0
7420701I03Rik	0	0	0	0	0	0	0	0	0	0	0
7530416G11Rik	0	0	0	0	0	0	0	0	0	0	0
7630403G23Rik	0	0	0	0	0	0	0	0	0	0	0
8030411F24Rik	0.593122	0.371319	0	0.80535	0.445289	0	0	0.509624	0	0	0.46122
8030423F21Rik	0.18893	0.215332	0.216037	0.225302	0.223351	0.177062	0.174698	0.148279	0.169554	0.19471	0.061516
8030423J24Rik	0	0	0.206868	0.27989	0	0	0	0	0.296574	0.214474	0
8030442B05Rik	0	0	0	0	0	0	0	0	0	0	0
8030443G20Rik	0	0	0	0	0	0	0	0	0	0	0
8030451O07Rik	0	0	0	0	0	0	0	0	0	0	0
8030455M16Rik	0	0.113715	0.093714	0	0.160703	0	0	0.892431	0	0.280174	0.157595
8030462N17Rik	3.65874	3.4326	4.2268	5.16568	4.84428	7.61437	5.19467	5.72731	4.17036	8.61706	6.70177
8430408G22Rik	4.44621	3.4705	3.16419	2.84408	3.68161	2.58635	2.76478	3.05863	5.41691	3.2561	3.09255
8430419L09Rik	8.09497	9.69768	8.60991	13.2317	13.1571	10.1636	11.3144	9.69949	12.0477	11.0461	12.2888
8430422H06Rik	0	0	0	0	0	0	0	0	0	0	0
8430423G03Rik	0	0.162674	0	0	0	0	0	0	0	0	0
8430426J06Rik	0	0.105068	0.126954	0	0.101672	0	0	0	0	0	0.089235
8430429K09Rik	4.29624	5.51974	4.50337	4.98707	5.43491	5.30607	3.99278	5.01099	6.80093	4.81835	5.43012
8430430B14Rik	0	0	0	0	0	0	0	0	0	0	0
8430431K14Rik	0	0	0	0	0	0	0	0	0	0	0
8430436N08Rik	0	0	0	0	0	0	0	0.095995	0	0	0.131988
8430437L04Rik	0.201481	0.134193	0.183853	0.303407	0.151821	0.255463	0.143319	0.211168	0	0.151965	0.198737
9030025P20Rik	4.00261	1.35596	4.1404	0.898021	4.41652	0.736296	4.19125	4.31651	3.51837	3.64409	3.21981
9030204H09Rik	0	0	0	0	0	0	0	0	0	0	0
9030404E10Rik	0	0	0	0	0	0	0	0	0	0	0
9030612E09Rik	1.17925	1.07204	0.797377	1.42195	1.13905	1.5016	1.18989	1.56437	1.35798	1.19624	0.961882
9030617O03Rik	1.31035	1.39556	1.15382	1.8632	1.09607	1.215	0.992921	1.1945	1.10194	0.898082	1.47256
9030619P08Rik	0	0	0	0	0	0	0	0	0	0	0
9030624G23Rik	0.95973	0.691424	0.716691	1.06922	0.851206	0.913742	1.1037	1.23656	1.03365	1.3497	1.0192
9030624J02Rik	18.998	20.2029	23.8013	27.2752	28.8028	26.7664	26.467	25.1905	24.7603	26.2765	24.7679
9030625G05Rik	0	0	0.194262	0.382618	0.894725	0	0.513395	0.394612	0.815381	0.135772	0.24327
9130008F23Rik	1.18581	1.32499	0.916725	0.740148	0.528137	0.430995	0.51287	0.714108	0.412832	0.363759	0.854285
9130011E15Rik	6.81941	4.75067	6.79694	8.00027	7.03402	7.04954	6.0157	5.26365	6.43232	4.30967	7.44232
9130015A21Rik	0	0	0	0	0	0	0	0	0	0	0
9130015L21Rik	0	0	0	0	0	0	0	0	0	0	0
9130019O22Rik	2.67857	2.56325	2.41144	2.71591	2.86264	2.81075	2.88943	3.29392	2.63701	2.80001	2.41398
9130019P16Rik	0	0.035285	0.089485	0.160758	0	0.04255	0.123305	0.092186	0.071455	0	0.052812
9130023H24Rik	2.8086	6.89126	3.25335	5.25706	4.88234	5.31846	3.87995	3.38262	3.87434	4.57521	4.04738
9130024F11Rik	0.192578	0.074453	0.120552	0.143534	0.143829	0.332804	0.212575	0.301938	0.188384	0.346994	0.392744
9130204L05Rik	0	0	0	0	0	0	0	0	0	0	0
9130209A04Rik	0	0	0	0	0	0	0	0	0	0	0
9130221F21Rik	0	0	0	0	0	0	0	0	0	0	0
9130221H12Rik	12.713	13.8455	14.4485	15.8973	15.684	13.3307	12.4702	9.78808	18.006	11.9356	13.1157
9130227L01Rik	0	0	0	0	0	0	0	0	0	0	0
9130230L23Rik	0	0.115111	0.199724	0	0	0	0.099859	0	0	0	0
9130401M01Rik	81.6561	82.819	81.3036	38.3849	42.8882	34.0198	47.8228	52.0422	50.7797	39.9253	47.244
9130409I23Rik	0	0	0	0	0	0	0	0	0	0.066575	0
9130409J20Rik	0	0	0	0	0	0	0	0	0	0	0
9230009I02Rik	0	0	0	0	0	0	0	0	0	0	0
9230102K24Rik	0	0.085634	0.103473	0.253663	0.378025	0.219271	0.273612	0.357053	0.494478	0	0.29001
9230102O04Rik	0	0	0	0	0.560258	0.579806	0.54147	0.776694	0.474636	0.98489	0.648739
9230104L09Rik	0	0	0	0	0.11366	0	0	0	0	0	0
9230105E05Rik	0	0	0	0.04324	0	0.106042	0	0	0	0	0
9230110C19Rik	5.68841	9.11556	8.90388	10.1149	10.1887	12.0281	12.6363	11.1253	9.58701	10.3817	11.809
9230110F15Rik	0	0	0	0	0	0	0	0	0	0	0
9230112D13Rik	0	0	0	0	0	0.122671	0	0	0	0	0
9230112J17Rik	0.097757	0	0	0.059614	0.031235	0	0	0.06335	0.07896	0.051617	0
9230114K14Rik	0.514101	0.315436	0.257812	0.622638	0.502412	0.720403	0.225061	0.527226	0.456307	0.861331	0.414796
9230116L04Rik	0	0.406262	0.180582	0.117815	0	0.089529	0.192778	0.877992	0.039808	0.158047	0
9230116N13Rik	1.19685	1.3346	1.50909	1.77153	1.84557	1.73365	2.11736	1.75248	1.79001	2.04971	2.1933
9230117E06Rik	0	0	0	0.194191	0	0	0.317152	0.194468	0	0	0
9330020H09Rik	2.05064	2.2784	2.10079	2.37923	2.29934	2.19727	2.28836	2.04011	2.07924	1.97974	1.74467
9330102E08Rik	1.60992	1.50245	2.10049	3.70333	4.03232	5.31905	3.571	2.61995	3.42294	4.2677	3.71693
9330111N05Rik	0	0	0	0	0	0	0	0	0	0	0
9330117O12Rik	0	0	0	0	0.061814	0	0	0	0	0	0
9330133O14Rik	5.73519	6.33026	5.35808	6.45435	6.70097	6.31798	5.46635	6.502	6.24784	5.91759	6.08012
9330136K24Rik	0.485243	0.822375	0.557465	1.01474	0.712661	0.8008	1.00813	0.977723	0.836608	0.869486	0.920091
9330151L19Rik	7.09749	7.97973	7.89642	7.89435	9.05138	8.05516	10.5012	7.21112	9.15475	10.4893	8.99221
9330158H04Rik	0	0	0	0	0	0	0	0	0	0	0
9330159F19Rik	0.352458	0.526026	0.437157	0.201968	0.156475	0.143521	0.186149	0.146545	0.170569	0.139645	0.209465
9330159M07Rik	0.938972	1.17075	1.1279	1.14118	1.35723	0.889977	1.13036	1.18912	1.40031	1.09551	1.08491
9330162012Rik	1.09834	1.36056	0.825058	1.1845	1.43042	1.16192	0.865226	1.00348	1.13402	1.15222	0.933628
9330162B11Rik	0	0	0	0	0	0	0	0	0	0	0
9330175E14Rik	0	0	0	0	0	0	0	0	0	0.082158	0
9330175M20Rik	0	0	0	0	0	0.037397	0	0	0	0	0
9330178D15Rik	0	0	0	0	0	0	0	0	0	0	0
9330179D12Rik	0.254218	0	0.311155	0.29504	0.266842	0.542068	0.39504	0.337	0.504496	0.392431	0.453425
9330182L06Rik	0.522538	0.505215	0.512372	0.575898	0.465324	0.690539	0.687911	0.462644	0.603104	0.729945	0.619047
9330182O14Rik	0	0	0	0	0	0	0	0	0	0	0
9330188P03Rik	0	0.103125	0	0	0	0	0	0	0	0	0
9330199G10Rik	0	0	0	0	0	0	0	0	0	0	0
9430007A20Rik	0	0	0	0	0	0	0	0	0	0	0
9430014N10Rik	0	0	0	0	0	0	0	0	0	0	0
9430015G10Rik	25.0181	25.136	29.0258	33.0847	34.1673	41.5561	29.7019	27.0325	24.1349	36.864	32.907
9430016H08Rik	24.2654	26.9932	24.901	23.4022	23.8722	22.3207	23.2273	20.3477	26.2993	19.9079	22.7853
9430018G01Rik	0	0	0.043076	0.059099	0.056016	0.069918	0.106462	0.037871	0.07867	0.09257	0.057855
9430019J16Rik	0	0	0	0	0	0	0	0	0	0	0
9430020K01Rik	13.5899	12.8768	11.7432	13.5098	12.9239	12.6439	12.4163	14.4312	11.2295	14.6584	13.353
9430021M05Rik	0	0	0	0.113233	0.035597	0.155509	0.073973	0	0.059991	0.085298	0
9430037G07Rik	0.682753	0.493125	0.876547	0.37392	0.545631	0.551927	0.696074	0.929453	0.648287	0.663544	0.711472
9430038I01Rik	12.5545	14.5448	14.4382	10.8377	12.0525	10.7262	11.0658	12.2272	15.5869	8.72819	12.876
9430041J12Rik	0.154616	0.188254	0.152956	0.06312	0.131461	0	0.153431	0.17887	0.083603	0.157275	0.102473
9430060I03Rik	0.285363	1.45865	1.79754	2.17403	0.283598	1.52382	2.29621	2.15819	1.95854	2.22374	0.505858
9430065F17Rik	0.774113	0.515625	1.1403	1.83654	1.68182	1.88428	1.04844	0.907741	0.872845	2.62796	2.82893
9430069I07Rik	0	0	0	0	0	0	0	0	0	0	0
9430076C15Rik	0	0.036837	0	0.032119	0.063108	0.031508	0	0.034132	0.063814	0.10429	0
9430078K24Rik	3.04068	3.72857	2.5009	2.90059	2.33841	2.99928	2.61166	3.11847	3.12797	2.15968	2.6043
9430083A17Rik	1.00447	1.26415	0.886064	1.27794	1.30964	1.25881	1.32721	1.35976	1.77076	0.968288	1.23015
9430091E24Rik	2.8626	2.89764	3.30404	3.44984	3.41938	3.87945	2.77168	2.28574	3.31597	3.43992	3.49694
9530002B09Rik	0	0	0	0	0	0	0	0	0	0	0
9530003J23Rik	0	0	0	0	0	0	0	0	0	0	0
9530014B07Rik	0	0	0	0	0	0	0	0	0	0	0
9530020I12Rik	0	0	0.064034	0	0	0	0.060582	0	0	0	0
9530026F06Rik	0	0	0	0	0	0	0	0	0	0	0
9530026P05Rik	1.06341	0.705433	0.843969	0.378923	0.711011	0.287752	1.00374	1.25171	1.08195	0.816718	0.385038
9530027J09Rik	3.50658	2.60099	3.83453	2.31487	0.79598	1.45514	2.92359	2.18235	3.12221	2.7557	1.93369
9530036O11Rik	0.061342	0.038134	0.043616	0.079988	0	0	0	0.088335	0	0.099286	0.096758
9530051G07Rik	0.06777	0.176952	0.161125	0.242177	0.345372	0.712702	0.363575	0.418532	0.481695	0.547962	0.461329
9530052E02Rik	0	0	0.188436	0	0	0.150059	0	0	0	0	0
9530053A07Rik	0	0	0.024071	0.018422	0.006628	0.03313	0.007522	0.012369	0.040665	0.044085	0
9530059O14Rik	0	0	0	0	0	0	0	0	0	0	0
9530062K07Rik	0.685925	0.497496	0.59583	0.856706	0.797145	0.55976	2.19081	1.30044	1.33444	0.643863	1.26367
9530068E07Rik	75.7689	82.701	72.777	87.7099	76.8178	72.4009	76.5072	72.8628	90.2772	73.626	77.0457
9530077C05Rik	2.77109	2.62338	3.1604	4.11649	5.46675	5.47592	4.8751	4.31154	4.39126	3.80647	5.35558
9530080O11Rik	0.121355	0.385163	0.334254	0.292723	0.540899	0.802189	0.482105	0.836053	0.479199	0.74203	0.878741
9530082P21Rik	11.3899	10.8749	10.4305	11.9277	12.3372	9.61207	11.8423	9.01734	13.1256	8.70612	10.1605
9530091C08Rik	0.067312	0.069939	0.084228	0.074092	0.028756	0.059072	0.073825	0.103523	0.064616	0.063361	0.0891
9630001P10Rik	0.336373	0.21832	0.355864	0.500119	0.543566	0.409965	0.465629	0.485028	0.435496	0.56805	0.517924
9630013A20Rik	0	0	0	0	0	0	0	0	0	0	0
9630013K17Rik	0.254927	0.200368	0	0.431594	0.392299	0.685008	0.696931	0.482215	0.180309	1.21906	0.508483
9630028B13Rik	0.032496	0	0	0.028564	0.032783	0.030823	0.034988	0.05312	0.03736	0.037099	0.027824
9630028H03Rik	0	0	0	0	0	0	0	0	0	0	0.041419
9630028I04Rik	3.1101	1.6841	2.96636	1.01474	1.53726	1.5333	1.33502	1.04079	1.1211	0.977452	1.37107
9830107B12Rik	0	0	0	0	0.04023	0	0	0	0	0	0
9830132P13Rik	0.028571	0.039964	0	0.02294	0	0.037316	0.01897	0	0.030769	0	0.05657
9830147E19Rik	4.09152	4.1768	4.00507	4.6219	4.29638	5.45773	4.9269	4.94055	3.29095	4.57284	4.78509
9830166K06Rik	0.174362	0.202228	0.278329	0.070441	0.109943	0.121688	0.20151	0.056496	0.046944	0	0.172186
9930012K11Rik	5.25603	4.97753	5.15057	4.99873	5.28297	4.50654	5.1943	3.89346	5.77144	5.53553	4.94803
9930014A18Rik	2.17516	2.15047	1.77889	2.58133	2.05798	2.0073	1.639	3.05403	2.3644	2.76239	2.12606
9930021J03Rik	9.06337	8.90656	9.63432	10.4552	10.5054	14.1658	10.9772	13.2958	9.34067	14.2395	13.7631
9930104L06Rik	9.38626	10.5415	9.15897	11.0366	10.7269	10.3607	10.0019	9.105	10.4857	10.7279	8.57379
9930111H07Rik	0	0	0	0	0	0	0	0	0	0	0
9930111J21Rik1	0	0	0	0	0	0	0.015425	0	0	0	0
9930111J21Rik2	0	0	0	0	0	0	0	0	0	0	0
a	0	0	0	0	0	0.219804	0.267508	0	0	0	0
A130010J15Rik	4.64161	4.33141	5.04264	5.84154	6.7465	8.17034	4.54053	5.1272	4.37402	6.93424	6.95839
A130077B15Rik	0	0	0	0	0.033022	0	0	0	0	0.057878	0
A1bg	1.30945	1.78477	1.80018	1.72347	1.48009	1.64242	1.64765	1.16828	1.74587	1.69813	1.62432
A1cf	0	0	0	0.025416	0.039398	0.074795	0	0	0.033663	0.049513	0.037134
A230001M10Rik	0	0	0	0	0	0	0	0	0	0	0
A230009B12Rik	0	0	0	0	0	0	0	0	0	0	0
A230020J21Rik	0.6711	0.067666	0.65927	0.837748	0.394137	0.228611	0.216202	1.84049	0.273508	0.152296	0.576943
A230028O05Rik	0.06319	0.059926	0.11098	0.172694	0.106336	0.102511	0.127892	0.184904	0.138411	0.200756	0.186616
A230046K03Rik	11.0091	11.2448	11.1709	9.9747	10.5039	12.5986	12.3538	17.0449	9.85656	13.9236	13.7155
A230050P20Rik	4.6457	3.54028	6.05687	5.18564	6.11952	4.97266	8.38265	4.09642	4.38498	3.52794	5.15158
A230056J06Rik	0.075875	0.053067	0.099744	0.138809	0.132724	0.104588	0.062973	0.065559	0.081712	0.060094	0.089764
A230056P14Rik	1.92525	1.88797	1.47698	2.90232	3.3299	2.10347	1.77018	2.34444	3.55295	1.52349	1.19805
A230057D06Rik	3.05292	3.96229	3.0105	5.36072	4.71505	4.78994	5.85439	5.54376	5.98438	5.26452	5.13595
A230065H16Rik	10.1808	11.682	10.5053	15.0691	14.6655	11.6288	16.9187	12.5394	16.3454	10.529	13.0611
A230070E04Rik	0	0	0.09712	0.105121	0	0	0	0	0.067876	0	0
A230072C01Rik	8.1428	7.31573	9.15187	9.73458	10.07	10.7542	8.38479	8.84214	8.77611	7.41878	9.21523
A230072E10Rik	0	0	0.02732	0.044357	0.083377	0.046414	0.063388	0	0	0.138264	0.034565
A230077H06Rik	0.142497	0.248553	0.172113	0.333411	0.298723	0.310712	0.132048	0.070567	0.263861	0.238166	0.26225
A230103J11Rik	2.64986	2.43891	1.80606	3.23133	2.30634	3.16035	3.62258	3.85135	2.50238	2.91893	3.11696
A230108P19Rik	0	0.044632	0	0.136205	0.198803	0.244713	0.079447	0.120389	0.179207	0.251453	0.224909
A2m	0	0	0	0	0	0.080811	0.083388	0	0	0	0.040385
A330009N23Rik	2.17711	1.60247	1.29353	1.75606	1.73445	1.86859	1.94198	1.673	1.96935	2.13701	1.43394
A330015K06Rik	0.18926	0.101577	0.10228	0.1096	0.034803	0.042354	0.090403	0.094117	0.058653	0	0
A330023F24Rik	1.5503	1.65089	1.77131	2.261	2.32158	3.69281	2.15955	1.36275	1.62442	3.0818	2.15423
A330032B11Rik	0	0	0	0.055768	0	0	0	0	0	0	0
A330033J07Rik	0.082562	0.210112	0.112238	0.034549	0.260121	0.244793	0.449082	0.191316	0.242478	0.279801	0.195514
A330035P11Rik	0.979293	0.992052	0.938405	1.53582	1.28774	1.72985	1.04714	1.14429	1.32775	1.75517	1.31
A330040F15Rik	0.267766	0.504436	0.179086	0.686497	0.42378	0.367518	0.528502	0.372745	0.520903	0.512688	0.324668
A330041J22Rik	0.277546	0.41901	0.715476	0.755397	0.389481	0.387085	0.644977	0.747017	0.550138	0.498286	0.447831
A330048O09Rik	0.444001	0.498369	0.670424	0.692283	0.229273	0.143085	0	0	0.76839	0	0.254248
A330049N07Rik	0	0	0	0	0	0	0	0	0	0	0
A330050F15Rik	0	0	0	0	0.033302	0	0	0	0	0	0.061912
A330069E16Rik	1.94048	1.79818	1.79306	2.44604	3.07325	3.61904	1.8471	1.3912	1.57769	2.21965	3.07601
A330070K13Rik	0	0	0	0	0	0	0	0	0	0	0
A330074K22Rik	0.096148	0.110954	0.180562	0.232572	0.229633	0.189819	0.1576	0.512947	0.310634	0.40423	0.209409
A330076C08Rik	1.71963	1.82925	1.32134	1.85275	2.02703	1.87168	2.48505	2.60402	1.89433	1.82085	1.90255
A330076H08Rik	1.72158	1.63226	1.44993	1.78706	2.09277	2.08045	2.01494	1.62148	2.08576	2.40365	2.40604
A330093E20Rik	0.247797	0.396212	0.31357	0.324177	0.294345	0.257726	0.351649	0.690253	0.374752	0.236233	0.518021
A330102I10Rik	0	0	0.185455	0	0.157763	0	0.270468	0.14221	0	0	0
A3galt2	0.387381	0.548228	0.33143	0.457031	0.481603	0.417828	0.550736	0.521056	0.376679	0.444113	0.517164
A430005L14Rik	66.9832	63.9494	67.5026	45.1942	47.3807	51.98	36.9907	40.0212	41.8666	45.8626	49.6933
A430033K04Rik	2.88792	3.30089	3.21903	3.76564	2.81053	3.52921	5.0348	5.9464	3.52088	4.56824	3.70148
A430035B10Rik	0.370061	0.432262	0.392314	0.627532	0.450244	0.862687	0.428318	0.39985	0.366083	0.554776	0.553386
A430046D13Rik	2.55836	3.46614	3.11448	6.39925	6.48538	7.59531	4.31217	3.14398	4.45781	6.27616	5.03586
A430078G23Rik	0.282302	0.350233	0.408977	0.551152	0.413721	0.49763	0.676467	0.696477	0.384149	0.71787	0.303433
A430078I02Rik	0.140307	0.145488	0.168472	0.249898	0.041541	0.274803	0.205159	0.256423	0.232776	0.576	0.179492
A430085M09Rik	0	0	0	0	0	0	0	0	0	0	0
A430088P11Rik	0	0	0	0	0.010328	0	0	0	0	0	0
A430089I19Rik	0	0	0	0	0	0	0	0	0	0	0
A430090L17Rik	0.226003	0.151317	0.17065	0.158323	0.230763	0.148889	0.204704	0.254309	0.190247	0.169818	0.112839
A430093F15Rik	0.198012	0.105514	0.063748	0.069	0.162686	0.179369	0.056346	0.146648	0.152319	0.14936	0.107301
A430105I19Rik	2.60859	1.85614	1.94048	2.70764	2.60145	2.2883	2.83663	2.7691	2.08518	2.96384	2.74146
A4galt	2.84687	2.6142	2.75407	1.79794	2.32624	2.25445	1.82081	1.74514	2.55756	2.06362	2.14526
A4gnt	0	0	0	0	0	0	0	0	0	0	0
A530006G24Rik	0	0	0	0	0	0	0	0	0	0	0
A530013C23Rik	0	0	0.031052	0	0	0	0.053062	0	0	0.058202	0
A530016L24Rik	0.882325	0.698441	0.401717	0.958686	0.737866	0.705555	0.841085	0.756366	0.732879	0.647131	0.750591
A530032D15Rik	0	0	0	0	0	0	0	0	0	0	0
A530046M15Rik	0	0	0	0	0	0	0	0	0	0	0
A530050N04Rik	0	0	0	0	0	0	0	0	0	0	0
A530053G22Rik	0	0	0	0	0	0	0	0	0	0	0
A530058N18Rik	0	0	0	0	0	0	0	0	0	0	0
A530064D06Rik	0	0.051386	0.070961	0.051205	0.069923	0.05023	0	0.040811	0.101733	0.091444	0
A530065N20Rik	0	0	0	0	0	0	0	0	0	0	0
A530072M11Rik	0.484567	0.601737	0.558134	0.551588	0.576979	0.514678	0.533541	0.528937	0.382687	0.579939	0.460531
A530088E08Rik	0.03333	0.155406	0.025037	0.134145	0.212987	0.106337	0.220193	0.086395	0.035894	0.211184	0.237577
A530099J19Rik	0	0	0	0	0	0	0	0	0	0	0
A630001G21Rik	1.07953	1.71668	1.12645	1.43434	1.55395	1.49799	1.31946	0.913584	1.76302	1.26239	1.72035
A630010A05Rik	0	0	0	0	0	0	0	0	0	0	0
A630012P03Rik	0	0	0	0	0	0	0	0	0	0	0
A630019I02Rik	0	0	0	0	0	0	0	0	0	0	0
A630020A06	0.033936	0.06329	0.076156	0.096572	0.086741	0.283526	0.067595	0.029322	0.036547	0.143344	0.040315
A630023A22Rik	0	0	0	0	0	0	0	0	0.241494	0	0
A630023P12Rik	0	0	0	0	0	0	0	0	0	0	0
A630033H20Rik	0.117927	0.219936	0.125495	0.286851	0.094197	0.08622	0.091348	0.220342	0.069849	0.227011	0.202361
A630066F11Rik	2.77467	2.00365	2.47306	4.12215	3.4753	2.76105	2.58279	2.49391	4.10854	2.5665	3.64353
A630072M18Rik	1.98145	2.53825	2.26496	2.13469	2.0437	2.45453	2.36657	2.64006	1.97212	2.48259	2.32275
A630073D07Rik	0	0	0	0	0	0	0	0	0	0	0
A630075F10Rik	0.141536	0.449124	0.379468	0.423848	0.29517	0.19163	0.303893	0.43304	0.418773	0.198157	0.266479
A630076J17Rik	0	0.418848	0	0	0.096341	0	0	0	0	0.474317	0
A630077J23Rik	0	0	0	0	0	0	0	0	0	0	0
A630089N07Rik	0.869039	0.346892	0.487162	0.406514	0.523291	0.701481	1.52351	1.63161	0.414089	1.52052	0.899097
A630095E13Rik	0	0	0	0	0	0	0	0	0	0	0
A630095N17Rik	0	0	0	0	0.156046	0.126601	0	0.140663	0	0	0
A730004F24Rik	0	0.127667	0	0	0	0	0	0	0.07372	0	0
A730006G06Rik	0	0	0	0	0	0	0	0	0	0	0
A730008H23Rik	0	0	0.281641	0	0	0	1.36172	0	0	2.07047	0
A730017C20Rik	8.50294	11.1226	7.61512	10.4933	11.4066	8.3856	9.71579	8.62385	11.3294	7.88571	9.45389
A730017L22Rik	3.20322	4.15376	3.73487	3.80368	4.0063	3.89897	3.8532	3.28133	3.93593	3.66167	3.83851
A730018C14Rik	0	0	0	0	0	0	0	0	0	0	0
A730020E08Rik	0.324173	0.23512	0.269219	0.497137	0.444996	0.812666	0.191322	0.248975	0.232741	0.680236	0.479837
A730020M07Rik	0.100847	0.117552	0.037878	0.12607	0.111551	0.054557	0.117178	0.087136	0.080775	0.079873	0.055776
A730036I17Rik	0.104564	0.13001	0.144003	0.042509	0.033409	0.0278	0.034713	0.118334	0	0.055211	0.041407
A730043L09Rik	0	0	0	0	0	0	0	0	0	0.167779	0
A730046J19Rik	0.240863	0.331875	0.352079	0.516211	0.308644	0.344687	0.531037	0.41513	0.587568	0.442827	0.552908
A730056A06Rik	0.342103	0.262252	0.403797	0.278157	0.255261	0.25641	0.480006	0.463194	0.45511	0.212509	0.429926
A730082K24Rik	0	0.092216	0	0	0	0	0	0	0.070998	0	0
A730085K08Rik	0	0	0	0	0	0	0	0	0	0	0
A730090H04Rik	0.212257	0.100645	0.35132	0.789783	0.688531	0.702297	0.786464	0.528437	0.697383	0.643949	1.12129
A730090N16Rik	1.07668	0.804509	1.08332	0.874938	1.19549	1.36728	1.47124	0.65598	1.34638	0.952484	1.02698
A830009L08Rik	0	0.138135	0	0	0.08172	0.051	0	0	0.06886	0	0.101283
A830010M20Rik	2.8911	3.08223	3.31577	3.04534	3.38513	3.6968	3.30136	3.25318	2.74087	3.90112	3.75585
A830011K09Rik	0.310604	0.25239	0.149123	0.502387	0.235934	0.059377	0.440993	0.33184	0.320041	0.104819	0.332499
A830018L16Rik	0.428221	0.16407	0.260321	0.098682	0.186247	0.164548	0.051877	0.129609	0.125217	0.178184	0.111245
A830019L24Rik	0	0	0	0	0	0	0	0	0	0	0
A830052D11Rik	0.370616	0.296233	0.278402	0.856137	0.437581	0.211146	0.31638	0.503211	0	0	0.544071
A830080D01Rik	31.1865	21.1885	34.223	17.0284	20.7238	24.6202	21.1424	25.912	17.7336	27.1472	25.6913
A830082K12Rik	0.674199	0.701316	0.584318	0.49313	0.883184	0.652021	0.531799	0.682332	1.1861	0.80687	0.717947
A830082N09Rik	0.760821	0.768899	0.618383	0.667625	0.80321	0.840102	1.06469	1.25085	0.7797	1.03727	0.972499
A930001A20Rik	0	0	0	0	0	0	0	0	0	0	0
A930001C03Rik	0.621604	0.835261	0.857929	0.582188	0.724113	0.583497	0.380332	0.274267	0.686631	0.315425	0.431815
A930002C04Rik	0	0.089015	0.05378	0.038808	0.091499	0	0	0.04124	0.051401	0.126006	0.075129
A930003A15Rik	0	0	0	0.12972	0	0	0	0	0	0	0
A930003O13Rik	0	0	0	0	0	0	0.061082	0.076937	0	0	0.097147
A930004D18Rik	3.17476	4.22173	3.66534	2.91749	4.25514	3.16806	5.03101	3.72254	4.03926	3.3762	4.14917
A930005H10Rik	3.00778	3.0018	2.47248	5.03245	3.30446	3.45845	4.92424	4.55374	3.71658	3.82286	4.1373
A930006I01Rik	0	0	0	0	0	0	0	0	0	0	0
A930006K02Rik	4.35846	5.14963	5.16404	6.11932	6.9288	6.05246	7.3677	8.50127	8.51728	6.64955	5.23042
A930007I19Rik	0.129107	0.167949	0.096498	0.250756	0.686224	0.102976	0.34016	0.730369	0.139039	0.366813	0.243518
A930009A15Rik	0	0	0	0	0	0	0	0	0	0	0
A930011G23Rik	0	0	0	0	0	0	0	0	0	0	0
A930012L18Rik	0.177155	0.207335	0.114066	0.472764	0.493431	0.161486	0.363541	0.201175	0.3675	0.266212	0.16035
A930013F10Rik	1.6486	1.88977	1.79138	2.34351	2.24211	2.66772	3.95923	5.06174	1.72297	5.35695	2.5596
A930015D03Rik	1.82509	2.08534	1.44107	1.98714	2.14839	2.17617	2.28215	1.83274	2.46685	2.3	1.62788
A930016O22Rik	0	0	0.0474	0	0.056003	0	0.021724	0	0.035235	0	0
A930017M01Rik	0.159839	0.116577	0.120404	0.202929	0.216834	0.199067	0.236857	0.154309	0.269262	0.169736	0.364217
A930018P22Rik	0	0	0.548742	0.346393	0.280082	0.233059	0	0	0.236009	0.231425	0.171138
A930019D19Rik	0	0	0	0	0	0	0	0	0	0	0
A930024E05Rik	3.95341	3.9233	4.3302	3.92566	3.524	3.93391	4.45828	4.11038	4.86495	3.34472	3.38057
A930031H19Rik	0	0	0	0	0	0	0	0	0	0	0
A930041C12Rik	0.488991	0.469993	0.936593	1.39333	1.08996	2.33543	1.53454	0.791034	1.56241	1.88889	1.74402
AA387883	0	0	0.053534	0	0	0	0.070977	0	0	0	0
AA388235	0.926866	1.09648	0.983941	1.10227	1.07088	1.02854	1.05805	1.40875	1.06176	1.04699	1.0401
AA413626	0.935274	0.830629	0.323404	0.832876	1.08148	2.39483	1.15572	1.02617	1.40692	2.15562	2.21632
AA414768	22.0107	22.6731	18.5026	24.5322	23.1813	20.9717	25.6705	22.3321	25.2231	20.3435	21.8943
AA415398	2.67291	2.78852	2.41758	2.98262	3.79545	4.20974	3.12909	2.69408	2.90479	3.71867	3.52532
AA465934	4.53224	5.57904	4.23504	3.19434	0.015035	0	3.81654	4.73587	5.05072	0	3.89887
AA467197	1.05556	1.54895	1.40487	0.800611	0.50019	0.712802	0.581496	0.967234	0.97317	0.197435	0.407202
AA474331	2.29319	2.73404	1.73128	2.16736	4.45334	2.08061	8.83019	9.73617	1.25571	9.56626	6.10559
AA536875	0	0	0	0	0	0	0	0	0	0	0
AA543186	0.912815	0.887354	1.32428	1.27024	1.49427	1.76273	1.2335	1.62912	1.80984	1.57729	1.40834
AA543401	0	0	0	0	0	0	0	0	0	0	0
AA545190	0	0	0	0	0	0	0	0	0	0	0
AA619741	0.044436	0.031273	0.117561	0.018179	0.035717	0.026749	0.029688	0.028977	0.023776	0.011805	0.061753
AA792892	0	0	0	0	0	0	0	0	0	0	0
AA986860	0.575347	0.802146	0.539567	0.46822	0.753956	0.440444	0.516512	0.476521	0.774097	0.608118	0.79529
Aaas	59.0858	52.2213	60.7882	48.2613	55.7859	53.8099	37.9376	36.9697	38.0519	43.5293	50.9141
Aacs	15.3891	16.7182	13.3244	12.5884	12.0734	9.57012	13.4322	12.04	13.3621	10.5747	11.2805
Aadac	0	0	0	0	0	0	0	0	0.597501	0	0.146472
Aadacl2	0	0	0	0.061188	0	0	0	0	0	0	0
Aadacl3	0.075899	0	0.042761	0	0	0	0	0	0	0	0
Aadat	0	0	0	0	0	0	0	0	0	0	0
Aaed1	10.2584	9.17238	10.3147	19.9383	16.0669	18.5928	15.4255	15.3378	12.3181	22.3451	16.3697
Aagab	21.9382	23.899	22.6581	19.8363	19.6739	17.2139	20.4606	18.9766	19.1379	19.17	19.9643
Aak1	3.9298	4.28177	4.08957	5.49446	5.15417	6.34077	5.07379	5.78433	4.38361	6.79444	5.70372
Aamdc	35.035	32.4366	28.2913	44.2357	38.3658	46.4288	38.8409	26.1028	28.3818	33.9698	35.9187
Aamp	121.953	116.428	111.698	110.193	109.542	97.6735	102.151	94.9246	115.915	96.7789	94.7801
Aanat	0.123356	0.07558	0.092664	0	0.105103	0.221526	0.163807	0.3329	0.177129	0	0.16283
Aar2	11.5949	12.2683	12.5227	15.4161	13.9263	14.164	12.3408	10.858	13.2583	14.1704	15.3643
Aard	22.0194	21.0105	20.4014	23.3778	21.1967	23.5993	22.597	16.1665	24.4255	17.932	18.6011
Aars	26.7494	29.8801	27.5357	27.2609	27.6707	25.4922	25.0998	25.7025	23.725	26.3485	26.0958
Aars2	5.70873	7.43614	5.26072	6.89724	5.76724	4.53008	7.39905	7.16576	7.10572	5.09085	7.43171
Aarsd1	42.9354	39.5172	40.5658	34.9846	38.204	33.9191	33.6856	36.0867	31.3889	33.4339	33.7635
Aasdh	5.28441	6.96733	7.62333	6.46287	5.37986	7.7262	6.28437	8.10975	6.25034	6.64547	7.27661
Aasdhppt	22.5897	24.0495	23.0269	18.5461	20.4141	20.1721	20.4986	21.193	18.1412	18.4762	22.2965
Aass	0.301767	0.285662	0.411654	0.845232	0.330301	0.244977	0.544267	0.153293	0.656753	0.373566	0.606857
Aatf	38.0758	31.7064	38.7618	26.0811	29.4947	27.2578	28.905	29.2818	28.4982	26.4993	25.8172
Aatk	0.283318	0.308484	0.480929	0.349386	0.375696	0.323585	0.694902	0.524255	0.599473	0.487637	0.618524
AB124611	0.914356	1.57327	1.24511	1.27997	1.43426	1.57441	1.24339	1.62924	2.1039	1.69363	1.68806
Abat	24.4041	27.6306	26.4498	36.4821	33.4944	31.2969	39.4894	35.6495	31.4311	34.7029	27.6215
Abca1	4.89571	5.13555	5.47476	5.8883	5.66035	6.39574	6.73375	6.07935	6.03834	6.47482	5.48892
Abca12	0	0	0	0	0.022967	0	0.019091	0.012267	0.022642	0.015182	0
Abca13	0.041103	0.041814	0.014034	0.015191	0.037789	0.026824	0.074664	0.080496	0.064387	0.027524	0.041357
Abca14	0	0	0	0	0	0	0	0	0	0	0
Abca15	0	0	0	0	0	0	0	0	0	0	0
Abca16	0	0	0	0.018905	0	0	0	0	0	0	0
Abca17	0	0.072342	0.091346	0.113398	0.067516	0.025218	0.080214	0.075519	0	0.078251	0
Abca2	4.55647	3.42846	4.53299	5.04651	5.57259	5.91621	5.44264	6.0514	4.35191	6.6127	6.68055
Abca3	4.0747	4.10857	4.70036	7.68937	8.05589	7.89695	7.19978	6.2841	5.82441	7.09387	7.41667
Abca4	1.0387	0.696525	1.06312	0.952822	1.21857	1.01872	0.960299	1.15448	0.934729	1.21525	0.848288
Abca5	1.16721	1.61573	1.70451	2.30519	2.27774	2.70852	1.80139	2.34033	2.22896	2.69875	2.34628
Abca6	0	0	0	0.024956	0	0	0.068052	0.10452	0	0	0
Abca7	2.28375	1.97625	2.03905	2.32849	2.15326	2.24264	2.61756	3.68628	2.4335	2.57529	2.99336
Abca8a	0	0	0	0.034647	0	0.042485	0.06366	0	0	0	0
Abca8b	0.460663	0.268071	0.323963	0.65609	0.418681	0.372297	0.592826	0.796689	0.297315	0.277165	0.274222
Abca9	0.407972	0.618326	0.429482	0.360518	0.461156	0.421009	0.507288	0.342166	0.565905	0.374316	0.477148
Abcb10	14.7306	15.0577	12.0434	9.88431	9.51422	11.1004	11.5933	17.6974	13.5293	9.95517	13.2871
Abcb11	0	0	0	0	0	0	0	0	0.026325	0	0
Abcb1a	0.312337	0.280969	0.256827	0.29786	0.25074	0.574036	0.39458	0.225904	0.546519	0.274904	0.410491
Abcb1b	0.256111	0.142067	0.174424	0	0.115659	0.126327	0.120935	0.145326	0.189484	0.084658	0.127258
Abcb4	0.357406	0.168057	0.248054	0.595194	0.319936	0.396097	0.295853	0.217852	0.81959	0.031008	0.191321
Abcb5	0	0	0	0	0	0	0	0	0	0	0
Abcb6	8.68965	7.5188	9.4571	13.7893	14.6848	15.6744	14.2167	11.2626	14.8875	14.385	15.7415
Abcb7	12.6065	8.76362	12.1586	8.57236	9.22894	10.504	8.46209	10.5905	6.32936	10.1146	11.1164
Abcb8	15.5856	12.3097	15.0076	16.8262	17.8407	12.9061	15.7933	14.7279	18.2189	16.1294	15.3761
Abcb9	0.304163	0.250171	0.256118	0.523388	0.594569	0.683436	0.414313	0.472623	0.459459	0.489758	0.496716
Abcc1	7.57777	7.11153	7.34323	6.91176	8.00875	7.25934	8.84092	9.58263	7.78435	7.70004	7.98538
Abcc10	3.96703	4.51572	4.42543	5.92681	6.50123	5.79906	5.36883	6.27318	5.99003	6.51081	6.09798
Abcc12	0	0	0	0	0	0	0	0	0	0	0
Abcc2	1.82813	1.2873	1.33213	0.305871	0.548265	0.42334	0.324604	0.773029	0.286076	0.293093	0.461677
Abcc3	0.694588	0.620729	0.414298	0.397998	0.600475	0.375884	0.555863	0.407003	0.602828	0.227172	0.561849
Abcc4	4.97416	3.65735	5.01827	1.4499	1.98423	1.54327	1.84093	3.08551	1.63457	1.66724	2.09824
Abcc5	24.9104	31.8155	31.5744	30.3574	27.9847	34.3103	39.0182	34.4102	31.662	33.6946	34.2764
Abcc6	0	0	0.045096	0.029189	0.077111	0.048123	0.016024	0	0.064977	0.032599	0.066898
Abcc8	0	0	0	0	0	0	0	0	0	0	0
Abcc9	2.0604	1.93596	1.63942	1.47312	1.54605	1.34174	1.51114	1.30241	2.02724	1.58657	1.75017
Abcd1	12.1103	7.96954	12.8386	11.9094	11.1523	14.7281	9.68392	8.57785	8.99311	15.0451	12.2262
Abcd2	1.07831	1.16436	1.25011	1.29944	1.1538	1.35964	1.1009	1.13277	1.32728	1.17691	1.04934
Abcd3	19.5254	21.7639	23.0723	24.1305	23.6178	23.4839	26.4567	23.4026	25.4818	21.0884	23.793
Abcd4	12.6251	12.4845	14.5713	8.37825	8.99615	8.078	10.1315	8.17177	10.4845	6.90896	6.5983
Abce1	62.1394	66.1028	62.0125	56.9958	58.7278	62.7831	65.1943	68.1115	54.029	62.6227	67.0277
Abcf1	38.2787	38.3942	39.041	32.3969	31.1816	27.2339	29.9513	30.0137	33.2318	28.9651	28.8582
Abcf2	72.9788	63.3578	71.7069	60.2495	62.1368	68.0336	46.3523	52.7426	45.0769	63.2425	62.7131
Abcf3	27.3301	25.6404	25.8306	24.5452	26.2384	24.892	29.0595	25.2947	26.2946	27.0836	23.5382
Abcg1	4.90007	4.61999	5.88153	1.54663	1.75455	1.45585	1.61915	2.14304	1.78546	1.703	1.74568
Abcg2	40.4283	41.6515	38.2783	31.2008	31.6462	33.776	28.5534	35.4579	31.4946	31.2972	36.5276
Abcg3	0.157753	0.11033	0.037032	0.112232	0.050404	0.110096	0.063293	0.102228	0.147061	0.104119	0.078088
Abcg4	1.50683	1.84856	1.37237	1.739	2.07446	1.98848	2.03728	1.91121	3.10159	1.15445	2.49519
Abcg5	0	0.246535	0.110124	0.243004	0.285932	0	0.156225	0.399491	0.313184	0.111674	0.187922
Abcg8	0	0.091286	0	0	0.041703	0	0.031891	0	0.105423	0.034458	0.051686
Abhd1	0	0.06561	0.02331	0.109933	0.021945	0.265833	0	0	0.236921	0.35679	0.268208
Abhd10	14.4048	14.4041	11.9167	10.5071	14.3862	13.9247	11.9889	12.1169	6.46438	11.5959	15.1145
Abhd11	44.143	42.6552	48.6012	37.4589	40.494	33.2007	36.4158	39.2717	42.9904	30.6414	38.6993
Abhd11os	10.619	9.39713	9.3307	1.49658	6.06896	3.09974	5.91078	5.03058	3.6252	4.92745	2.36567
Abhd12	29.2809	32.7134	32.1203	39.7817	39.6383	43.5629	30.7548	30.0164	30.9466	35.7254	38.8407
Abhd12b	0	0	0	0	0	0	0	0	0	0	0
Abhd13	10.1796	9.60536	9.62109	9.86258	10.3393	10.4491	9.9872	10.9086	8.59401	11.5416	9.96372
Abhd14a	48.1657	43.0081	52.1148	36.9316	41.2662	38.8647	45.3992	35.8861	45.0646	33.0438	40.5813
Abhd14b	20.2371	23.0768	21.6472	24.6091	24.3477	22.3279	22.0404	20.7017	22.5431	20.6938	20.3285
Abhd15	0.34987	0.137373	0.305332	0.348977	0.320006	0.254212	0.379016	0.241045	0.36479	0.25643	0.287718
Abhd16a	18.3322	19.655	19.6006	25.9159	22.8148	27.4224	20.5716	14.9151	25.1058	17.9682	22.402
Abhd16b	0.168529	0.157157	0.253194	0.356272	0.235311	0.181467	0.289253	0.145615	0.145196	0.390643	0.361716
Abhd17a	68.7239	67.3559	67.8073	64.0514	63.8323	56.3921	61.7289	50.4661	78.9515	56.2811	58.783
Abhd17b	14.0068	15.1418	14.8215	13.0394	14.4078	13.8001	13.6857	15.2786	15.1839	14.3123	16.1371
Abhd17c	29.2844	28.559	30.8233	25.9439	26.1627	24.0908	22.8014	24.984	27.203	24.2518	24.8401
Abhd2	1.90926	1.74869	2.09921	1.38465	1.11038	1.13297	2.35639	3.89813	1.11107	2.85492	2.07501
Abhd3	11.1716	17.3233	14.4564	16.6707	15.6157	18.2254	18.7374	15.597	16.1975	14.4553	16.015
Abhd4	45.6247	46.1043	48.0356	56.2135	50.0427	47.4098	48.3301	45.6025	53.7683	41.2587	48.0491
Abhd5	4.08633	4.86351	4.12182	6.219	5.51166	5.44517	5.48638	5.67569	5.57271	4.96071	5.08872
Abhd6	9.83226	10.5009	11.8801	14.601	15.3259	13.8016	15.8497	13.9578	12.6293	15.1154	14.1806
Abhd8	17.0336	17.5583	18.1811	23.4849	21.7508	20.1667	22.5722	18.2884	24.2061	22.731	20.1732
Abi1	24.298	27.7276	28.5647	27.6125	27.9365	31.02	26.8818	28.2767	29.2845	30.4232	32.4917
Abi2	14.9153	15.1237	15.3302	15.0347	16.0459	16.2611	13.192	14.7388	14.0344	14.0733	16.5073
Abi3	1.82631	1.68055	1.25655	0.900096	1.33163	0.978782	1.27888	1.39881	2.16586	0.957109	1.65741
Abi3bp	1.21671	1.43231	1.01273	1.83265	1.96692	1.84712	1.59807	1.22994	2.04242	1.62322	1.30069
Abl1	26.7179	25.6321	25.8408	28.1571	26.3425	25.3481	27.9607	28.5272	26.6414	30.9093	26.1466
Abl2	9.9249	9.42953	11.4094	5.79402	6.33394	6.57784	6.90803	10.342	6.5507	8.28929	7.37093
Ablim1	9.15536	9.37322	10.4464	11.281	10.797	7.80014	10.2859	12.9948	7.97107	10.4783	7.67604
Ablim2	0.650525	0.281499	0.578058	0.816579	0.821278	0.691579	0.911682	0.839928	0.762094	0.638405	0.747441
Ablim3	5.71354	7.99184	5.42683	7.18492	7.06938	4.81765	7.06671	6.10541	5.60004	5.41575	5.29796
Abo	0.09999	0.15152	0.050074	0.107723	0.106494	0.132922	0.15491	0.172792	0	0	0.316769
Abr	13.7868	14.9518	14.9106	20.6271	18.3114	19.1249	19.2388	18.1576	17.1527	19.2525	17.952
Abra	0.237681	0.158316	0	0	0	0	0	0	0	0	0
Abracl	44.412	45.7357	42.6907	48.903	43.917	39.9918	44.0843	38.0849	55.5117	22.1595	43.8853
Abt1	10.0802	8.52305	9.76644	7.79697	8.31862	8.15325	8.03626	7.33784	7.53292	7.02038	7.47491
Abtb1	21.3246	20.4072	21.8759	18.5994	21.0681	20.0807	18.7944	18.7256	20.828	17.8558	18.9383
Abtb2	1.50987	2.00113	2.4261	3.43576	2.62141	2.77886	1.92984	1.70223	2.27938	2.86971	2.27547
Acaa1a	42.4602	39.6386	41.1533	41.8594	41.9533	35.8986	41.7821	27.5602	43.6033	35.3806	38.2656
Acaa1b	14.7224	13.4599	10.2668	12.5902	14.6602	12.6039	15.2554	10.0977	15.8601	11.0177	13.5861
Acaa2	223.411	236.055	214.639	245.947	256.725	212.116	285.734	255.792	265.93	221.666	236.179
Acaca	4.16235	4.52481	4.15217	6.37633	5.95771	6.7856	4.45639	3.87924	4.33885	4.79482	5.35278
Acacb	2.09936	2.36029	2.16766	1.4129	1.47373	1.11652	1.27291	1.55619	1.30373	0.815033	1.51315
Acad10	1.36015	1.74466	1.7701	2.22548	2.51548	2.20826	2.16819	1.16561	1.39757	1.62462	2.01181
Acad11	8.38356	9.24036	10.1318	8.84021	7.61676	9.25701	10.3134	10.8678	8.24597	8.23846	9.61068
Acad12	2.23415	2.25851	3.02178	3.97407	3.44046	3.79766	3.36333	2.1756	2.77189	3.03682	3.41187
Acad8	22.5492	22.1322	18.3745	22.6656	20.8204	19.1829	20.7331	16.3334	18.7391	19.1652	18.5316
Acad9	11.4434	12.7218	11.5304	14.1028	13.1323	14.2968	14.6629	13.9319	12.3829	13.2477	12.8396
Acadl	61.4364	68.8376	65.6359	59.594	66.0378	54.2485	61.6201	57.0811	65.9396	54.8745	59.6228
Acadm	45.6886	49.5378	49.5791	39.3797	38.2531	33.7732	48.7073	42.9103	43.4262	36.8859	40.4649
Acads	25.1259	27.9807	26.0333	16.5694	13.8632	20.3881	25.3058	13.9497	30.7395	15.2824	25.0157
Acadsb	22.1787	26.7847	24.0869	26.4072	27.6222	27.7152	30.699	29.4098	25.6259	30.1961	25.0908
Acadvl	45.9135	39.3839	41.2698	53.846	54.7211	60.1785	46.4574	45.6753	44.8162	55.137	48.0978
Acan	0.510764	0.483569	0.355844	0.772165	0.840126	0.655615	0.702589	1.10756	0.725555	0.572307	0.466192
Acap1	0.268768	0.603229	0.228792	0.630136	0.61243	0.731231	0.504973	0.469826	0.777544	0.753994	0.820407
Acap2	9.21227	9.1962	10.0638	11.1504	10.5424	11.3848	11.6508	12.8218	10.2429	13.6754	11.275
Acap3	4.27936	4.26745	3.92171	5.05001	5.05417	4.40074	6.00739	4.54941	5.92577	4.70247	5.19099
Acat1	40.888	41.9703	39.6623	42.1037	41.7764	36.3329	46.3154	42.805	46.5197	37.8564	39.6958
Acat2	41.6549	39.7257	43.0875	47.3571	50.3994	51.8337	34.1963	35.8419	38.2988	44.2132	46.6151
Acat3	3.10919	3.41778	2.68587	1.42718	0.573949	3.4463	4.93911	2.03099	2.47832	4.20045	2.67455
Acbd3	18.4623	21.1895	22.6271	17.9239	18.0893	22.2836	20.2604	21.0549	16.1762	22.6419	20.5228
Acbd4	3.94189	5.04615	4.05729	5.34838	4.96655	3.34974	5.2923	4.30421	5.21547	4.00226	4.18594
Acbd5	6.91739	9.84855	8.93904	9.17156	8.11925	10.4281	9.52389	11.1468	9.3894	9.78597	10.3129
Acbd6	51.375	37.3783	42.4815	28.3591	53.4536	46.4235	43.6017	24.1736	36.5461	42.4432	31.9067
Acbd7	0	0	0	0.454624	0	0.356777	0.371246	0.386493	0	0.348158	0.442836
Accs	4.48151	3.35486	4.52946	4.76715	5.22898	4.64075	3.997	4.9641	5.55604	2.99168	4.44804
Accsl	0	0	0	0.043726	0	0	0	0	0	0	0
Acd	30.1376	29.707	25.7297	31.817	34.0775	26.9108	27.0264	19.9775	32.531	24.9744	26.2081
Ace	0.104884	0.153421	0.11454	0.103433	0.120153	0.046866	0.093632	0.142154	0.239827	0.09928	0.102148
Ace2	6.15335	6.33486	6.85699	7.06397	6.54781	6.34382	7.02268	8.03507	7.40424	6.0403	5.58592
Ace3	0	0	0	0	0	0	0	0	0	0	0
Acer1	0.322662	0.367497	0.151256	0.444592	0.489105	0.412065	0.42806	0.202177	0.712874	0.338135	0.382345
Acer2	4.35817	3.77355	4.1937	3.57616	4.14215	3.57058	3.89584	3.10687	5.24042	3.07932	3.24984
Acer3	4.7044	3.90586	4.79252	14.3111	14.9138	25.2778	5.81263	5.35674	5.22968	19.2963	14.6371
Ache	1.27471	1.4326	0.372485	1.69374	1.04609	0.903045	1.32166	3.34021	1.97124	0.203377	2.06961
Acin1	69.4426	114.701	119.705	113.808	129.941	124.68	150.912	134.066	93.1624	81.061	114.892
Ackr1	2.21642	3.68716	0.73739	1.79897	2.26978	2.58581	3.24596	4.32676	4.11454	1.08845	2.77222
Ackr2	0.198632	0.20375	0.16413	0.209954	0.253542	0.205958	0.263767	0.23813	0.427825	0.272686	0.125853
Ackr3	2.75727	2.20617	3.02617	2.87222	2.43736	3.4172	3.67437	2.36287	3.49242	2.66231	3.39708
Ackr4	5.08186	5.84072	5.6946	7.42506	6.58835	7.0662	7.02611	5.89287	6.38474	5.78191	6.53296
Acly	33.6187	31.3453	30.2137	36.6545	35.0268	34.2883	38.7682	38.5052	38.6075	39.1542	34.2936
Acmsd	0.259782	0.212091	0.115623	0.316308	0.450126	0.180039	0.202553	0.306222	0.363	0.0823	0.307221
Acnat1	0.071111	0.129033	0.142447	0.04505	0.087096	0.06558	0.125118	0.145755	0.096747	0.039424	0.058196
Acnat2	0	0	0	0	0	0	0	0	0	0	0
Aco1	23.1387	19.9985	23.1462	19.5152	19.699	17.9612	23.3249	21.9641	17.4357	19.8801	19.4647
Aco2	109.818	95.6436	106.845	98.3871	106.271	112.642	96.4247	91.0847	88.5424	104.2	104.673
Acot1	67.4732	63.8656	67.6773	50.173	51.2258	45.0772	47.4406	48.7785	50.2829	40.3326	41.669
Acot10	6.22315	4.94566	6.83816	3.92133	4.78948	4.76064	5.47487	5.8832	7.12268	3.69333	5.39268
Acot11	1.787	1.84435	1.5874	1.98621	1.49127	1.4835	2.36914	2.38091	2.6242	1.63131	1.60351
Acot12	0	0.054894	0	0.031909	0.025078	0.045932	0.039085	0	0	0	0
Acot13	60.4602	57.0391	64.1066	51.0373	59.4006	54.9463	51.6388	48.9072	59.7072	45.3835	51.6579
Acot2	23.4603	22.3636	22.7163	22.2256	21.9553	18.3512	20.2331	19.7885	21.75	17.3939	18.6488
Acot3	1.87529	2.38267	3.48091	2.01482	1.7917	1.60594	1.91621	2.71867	1.80199	1.63982	1.62682
Acot4	1.72388	0.526711	0.544076	1.31759	0.530842	0.955781	1.50798	1.94802	1.10899	0.470746	0.526609
Acot5	0	0	0	0	0.419965	0	0	0	0	0	0
Acot6	2.26418	2.71139	2.1608	2.9523	2.27025	2.30149	2.60802	3.235	2.43376	2.72525	2.19529
Acot7	23.2055	25.9159	27.5133	39.609	40.9207	41.255	32.8852	23.634	39.4028	36.9552	37.4713
Acot8	12.1246	10.6891	10.4506	14.4144	11.5435	13.2543	13.1869	12.2183	10.1923	10.3411	14.0509
Acot9	27.7086	21.2018	28.0286	16.9836	17.9654	18.7332	23.623	21.2299	16.0295	16.3774	18.9581
Acox1	15.2598	17.3382	17.3332	18.7518	19.1542	18.8875	19.6897	17.7148	18.0784	19.36	18.4975
Acox2	0	0	0	0	0	0	0	0	0	0	0
Acox3	4.34857	4.46435	3.88317	4.75373	4.32907	4.15348	3.96712	4.57604	4.21343	4.68327	4.20678
Acoxl	0.12547	0.156003	0.10996	0.168364	0.160355	0.198898	0.219255	0.10841	0.090082	0.152334	0.128263
Acp1	20.9349	22.1251	19.3001	23.871	22.4945	22.0453	21.0592	20.8323	24.5813	16.8086	22.257
Acp2	16.0292	17.7991	15.4917	25.3034	25.5509	24.8744	21.6496	19.6054	18.6813	24.974	23.1589
Acp5	9.94462	14.1153	7.29846	12.3278	9.67002	11.1316	11.6925	15.053	19.851	4.22878	19.8735
Acp6	17.9971	14.4596	19.3006	9.46264	14.3511	13.307	13.7637	10.4438	10.8283	12.1476	14.1882
Acpp	0.469885	0.327228	0.371341	0.130066	0.16164	0.159223	0.167284	0.119393	0.203721	0.070386	0.073905
Acpt	0	0	0	0	0	0	0	0	0	0	0
Acr	0.569835	0.566985	0.801613	0.716062	0.9753	0.39512	0.583048	0.3557	1.03529	0.5191	0.97579
Acrbp	5.74916	11.2506	5.45017	7.0759	7.17918	13.4826	7.27285	11.8199	6.26046	5.23402	6.66598
Acrv1	0	0	0	0	0	0	0	0	0	0	0
Acsbg1	30.1144	30.2694	25.822	30.3429	33.0577	26.8423	35.3252	23.7096	31.4693	30.9869	29.9551
Acsbg2	0	0.042784	0.186078	0	0	0	0	0	0	0	0
Acsf2	11.0568	10.4593	11.4455	13.1024	14.1528	10.5095	12.7876	14.4642	15.9557	12.3305	13.1173
Acsf3	7.69877	6.88403	6.81473	9.09683	6.04351	8.9327	4.8802	3.99192	7.83928	8.40996	8.03507
Acsl1	9.694	11.034	10.5611	7.14964	8.19275	8.0838	6.1803	7.84362	6.36776	7.40442	8.13341
Acsl3	27.4812	24.5461	26.0319	23.6592	24.2251	25.2346	23.6863	30.6223	21.405	28.2749	26.3199
Acsl4	3.35767	3.67896	3.17065	4.27811	3.97446	4.3904	4.06753	4.23061	4.01074	4.67569	4.59164
Acsl5	10.0045	8.94489	7.37713	12.2269	11.0521	7.61339	11.4227	10.0213	13.3843	8.24757	8.1932
Acsl6	0.129732	0.100814	0.048726	0.228105	0.110535	0.085797	0.100493	0.160017	0.138548	0.159832	0.154121
Acsm1	0	0	0	0	0	0	0	0	0	0	0
Acsm2	0	0	0	0	0	0	0	0	0	0	0
Acsm3	1.0831	3.18269	2.29481	3.18122	3.28689	2.66193	3.76984	3.42211	2.64463	2.42665	4.03004
Acsm4	0	0	0	0	0	0	0	0	0	0	0
Acsm5	0	0	0	0	0	0	0.079734	0	0	0	0
Acss1	11.2883	9.80252	9.83585	8.65064	8.25646	6.31607	6.73862	9.42631	8.37505	7.01818	7.53047
Acss2	5.39935	4.59636	4.68435	13.4366	17.3283	25.3955	8.18965	6.79405	5.40842	18.0918	12.5665
Acss2os	0	0	0	0	0	0	0	0	0	0.335755	0
Acss3	0.048055	0	0	0	0	0	0.063813	0	0	0.050747	0.054363
Acta1	0.740708	0.821562	0.499912	36.2246	0.362905	0.666729	0.549106	1.13773	1.60871	2.47616	0.993552
Acta2	46.8963	53.9058	40.6244	51.7592	35.5736	41.7891	48.6473	31.0728	59.7705	32.7919	44.5367
Actb	873.195	886.4	791.39	772.887	730.639	671.533	694.789	663.573	864.988	621.934	685.948
Actbl2	0	0.038219	0	0.017774	0	0.034869	0.029027	0.017943	0	0	0
Actc1	0.801742	2.07436	0.905306	49.037	0.532213	1.73625	1.65205	3.11611	2.65062	2.21127	3.335
Actg1	352.108	340.288	337.488	310.671	304.187	266.847	295.856	290.371	350.276	263.04	279.078
Actg2	0	0.295923	0.505811	0	0	0	0.358718	0	0.923586	0	0.662345
Actl10	1.33228	1.09091	0.893001	1.94206	1.78612	1.86059	3.20684	3.6368	1.7889	3.17158	2.06454
Actl11	0	0.013623	0	0	0	0	0	0	0	0	0
Actl6a	71.4022	61.8728	65.6843	56.0712	58.7347	58.1534	57.8409	63.609	50.3566	51.5135	58.3079
Actl6b	0	0	0	0	0	0	0	0.092167	0	0	0
Actl7a	0	0	0.029882	0	0	0	0.026412	0	0	0	0
Actl7b	0.084205	0	0	0.034233	0.053809	0	0.027954	0	0.045341	0	0.032511
Actl9	0.087404	0.122258	0.163321	0.114594	0.195485	0.285826	0.195135	0.187857	0.188256	0.1846	0.242282
Actn1	28.767	33.7095	31.7578	24.5563	25.5479	25.0969	30.5727	31.7158	32.7558	29.3959	27.4185
Actn2	1.7321	1.90346	1.47526	6.06503	0.12684	0.257932	1.03535	0.836294	0.4313	0.658104	0.603011
Actn3	0.757494	0	0.171237	1.13406	0.722371	1.0893	0.941485	0.498239	0.593492	0.806581	0.443964
Actn4	80.5384	74.3324	74.6471	66.8098	70.418	67.2824	66.1822	65.1873	68.1569	72.1494	65.6205
Actr10	25.1873	21.8204	24.2506	27.1992	27.5703	30.8517	22.4837	22.1423	23.598	27.3292	26.8513
Actr1a	48.4981	45.0272	44.3405	55.9888	54.0147	54.0664	56.0132	50.4172	55.9595	52.185	50.2585
Actr1b	37.1623	34.9651	34.2711	35.4285	32.1851	28.0406	37.5545	32.2821	32.5662	33.5208	30.7431
Actr2	38.1673	39.5217	35.5239	34.9464	31.7992	32.0687	36.6552	40.5159	32.8695	32.1985	34.7367
Actr3	62.4346	66.071	61.1423	48.467	47.0878	46.932	48.2041	52.3232	56.7955	42.2117	52.5789
Actr3b	7.92848	10.5409	9.06416	2.43305	3.89308	4.97026	3.78055	3.20458	3.40255	4.60636	4.66806
Actr5	6.22729	4.53207	5.91186	4.18539	5.1098	4.41047	7.80381	5.21265	5.59144	2.86127	4.53409
Actr6	46.4045	54.6409	47.8963	53.7681	55.9231	55.8654	53.9705	55.7569	52.3961	39.4141	52.8856
Actr8	16.4869	18.0374	17.96	17.4303	20.3908	20.6872	18.2424	16.264	17.9634	21.1234	20.3106
Actrt1	0	0	0	0	0	0	0	0	0	0	0
Actrt2	0	0	0	0	0	0	0	0	0	0	0
Actrt3	0	0	0	0	0	0	0	0	0.068108	0	0
Acvr1	10.4344	10.518	10.2084	7.06149	6.93188	6.99803	6.68308	7.79724	9.57838	7.30734	6.9838
Acvr1b	9.40471	8.55937	8.70674	7.36237	6.51598	6.27924	8.82198	10.2872	6.88492	9.0925	8.06287
Acvr1c	0.165231	0.258398	0.212759	0.220586	0.198888	0.294905	0.261998	0.280233	0.278069	0.229264	0.230748
Acvr2a	5.70799	6.60615	5.92966	6.61131	6.09092	6.56255	7.21074	8.54392	7.02245	7.09014	7.47969
Acvr2b	2.50561	3.10413	3.03506	2.43158	1.50341	1.70887	2.30766	4.42544	0.954446	4.27304	2.57257
Acvrl1	6.73839	7.85256	7.32318	8.11476	7.96429	6.09317	6.9113	5.63876	8.65002	7.54579	6.38291
Acy1	39.593	36.2418	36.8939	30.655	32.7666	27.2436	35.1084	34.7066	35.2456	26.6651	34.572
Acy3	12.2011	7.67442	8.04365	8.018	9.97671	7.10926	9.33998	7.32769	10.049	5.85857	6.88333
Acyp1	26.057	22.0997	22.7744	18.1968	24.7751	23.3164	24.0179	20.105	34.0249	18.9294	19.9204
Acyp2	11.8066	14.3532	10.5272	7.11951	11.2764	12.4594	4.88237	9.50667	14.3372	6.4615	12.4024
Ada	5.2595	1.58831	1.94659	3.48586	4.85094	1.57573	4.48767	4.76405	4.07939	2.48088	4.52121
Adad1	0.660373	0	0.340815	6.73522	5.71956	9.46189	3.77536	2.07165	1.99734	6.73088	3.31628
Adad2	7.78278	7.27608	10.0355	8.75289	12.3129	13.6332	26.5293	17.008	21.5658	13.9309	16.6965
Adal	8.8087	10.3201	9.25734	12.0471	12.1304	13.996	13.5108	12.5845	10.223	13.4341	14.3049
Adam10	40.7215	43.8914	41.5345	52.6212	48.8783	54.0743	51.2564	53.9136	50.5845	57.5774	52.4672
Adam11	1.14041	1.56235	1.1328	1.90427	1.55057	1.28954	2.11289	1.29614	1.87943	1.51932	1.65034
Adam12	1.39287	1.78794	1.54513	1.98266	1.5015	1.65011	1.52678	1.36898	2.53182	1.6777	1.71311
Adam15	8.01456	8.0884	7.73969	10.3275	10.1787	7.45102	9.49165	6.74832	10.658	7.26506	8.058
Adam17	19.7849	4.96918	3.82644	21.2686	4.43572	21.4914	6.40056	21.8879	17.1081	21.4337	20.1133
Adam18	0	0	0	0	0	0	0	0	0	0	0
Adam19	16.1297	17.463	16.6086	9.06997	7.90119	7.91148	9.15017	10.6974	10.313	9.58936	9.07198
Adam1a	2.10205	1.9284	2.37119	3.08769	3.07832	3.25077	3.98662	3.15854	2.90375	3.48563	2.94614
Adam1b	0.524583	0.464277	0.536647	0.637787	0.629179	0.790697	0.86998	0.758195	0.500989	0.918168	0.753305
Adam2	0	0	0	0	0	0	0	0	0	0	0
Adam20	0	0	0	0	0	0	0	0	0	0	0
Adam21	0.082209	0.172489	0.277896	0.116975	0.196672	0.195892	0.245627	0.124306	0.243468	0.237655	0.195329
Adam22	2.03042	1.66178	2.31897	3.58624	3.78189	4.94961	3.85275	3.59679	3.86651	3.65176	4.07081
Adam23	0.405419	0.317888	0.350024	0.85177	0.834803	1.02155	0.687959	0.4722	0.818704	1.09805	1.02327
Adam24	0	0	0	0	0	0	0	0	0	0	0
Adam25	0	0	0	0	0	0	0	0	0	0	0
Adam26a	0	0	0	0	0	0	0	0	0	0	0
Adam26b	0	0	0	0	0	0	0	0	0	0	0
Adam28	0	0	0	0	0	0	0	0	0	0	0
Adam29	0	0	0	0	0	0	0	0	0	0	0
Adam3	0	0	0	0	0	0	0	0	0	0	0
Adam30	0.02533	0	0	0.04119	0	0	0	0.021886	0	0	0
Adam32	0	0	0	0	0	0	0	0	0	0	0
Adam33	1.39147	1.80067	1.53599	2.02177	1.99346	1.88369	1.53063	1.92564	3.12616	1.07559	2.10718
Adam34	0	0	0	0	0	0	0	0	0	0	0
Adam39	0	0	0	0	0	0	0	0	0	0	0
Adam4	0.465506	0.49186	0.517251	0.392673	0.595347	0.409434	0.305242	0.385852	0.256477	0.577448	0.246492
Adam5	0	0.188265	0	0	0	0	0	0	0	0.061448	0
Adam6a	0	0	0	0	0	0	0	0	0	0	0
Adam6b	0	0.024566	0	0	0	0	0	0	0	0	0
Adam7	0	0	0.050575	0	0	0.027271	0.022908	0.044717	0	0	0
[truncated: 22,422 more rows]

## Sheet: Quick_Calc
Gene_ID	TPM_Dazl_KO_1	TPM_Dazl_KO_2	TPM_Dazl_KO_3	TPM_Dazl_WT_1	TPM_Dazl_WT_2	TPM_Dazl_WT_3	TPM_Stra8_KO_1	TPM_Stra8_KO_2	TPM_Stra8_KO_3	TPM_Stra8_WT_2	TPM_Stra8_WT_3
Stra8	10.199	8.23366	19.2536	136.103	165.411	201.47	0.162442	0	0	163.602	164.546
Ave TPM
	WT	Dazl-KO	Stra8-KO
Stra8	139.038	12.5621	0.0541473
Ave TPM
	WT	Dazl-KO	Stra8-KO
Stra8	10.3921	3.39352	0.0541473

## Sheet: DESeq_WT_DazlKO
	baseMean	log2FoldChange	lfcSE	stat	pvalue	padj
0610005C13Rik	11.1948	0.60617	0.510668	1.18701	0.235223	0.409624
0610007P14Rik	1328.24	-0.30872	0.0733481	-4.20896	2.56545e-05	0.000197588
0610009B22Rik	553.759	-0.10629	0.107734	-0.986592	0.323843	0.511858
0610009L18Rik	89.8249	0.329374	0.182486	1.80493	0.0710855	0.169133
0610009O20Rik	886.342	-0.085119	0.0976241	-0.871906	0.38326	0.572854
0610010B08Rik	33.3357	-0.110466	0.283258	-0.389982	0.69655	0.826867
0610010F05Rik	603.013	0.394524	0.119997	3.28779	0.00100978	0.00506884
0610010K14Rik	1309.41	-0.28868	0.0795141	-3.63055	0.000282822	0.00166829
0610011F06Rik	552.983	0.341544	0.0873278	3.91106	9.18921e-05	0.000613688
0610012G03Rik	1053.33	-0.140303	0.0838025	-1.67421	0.0940889	0.209759
0610030E20Rik	767.851	-0.0107733	0.08557	-0.1259	0.899811	0.948446
0610031O16Rik	0	NA	NA	NA	NA	NA
0610037L13Rik	817.623	0.015714	0.0731642	0.214778	0.829941	0.907754
0610038B21Rik	32.4931	0.0929665	0.294338	0.315849	0.752117	0.862859
0610039H22Rik	0.435648	1.53392	2.36564	0.648415	0.516716	NA
0610039K10Rik	26.6629	0.348666	0.34801	1.00188	0.3164	0.503618
0610040B10Rik	54.2273	0.290253	0.256751	1.13048	0.258272	0.43683
0610040F04Rik	4.57761	-0.708811	0.715945	-0.990035	0.322157	0.510031
0610040J01Rik	9.35432	0.280309	0.54637	0.513039	0.607924	0.763169
0610043K17Rik	3.26253	1.95783	1.14391	1.71152	0.0869845	0.197783
1010001N08Rik	204.405	0.440619	0.133354	3.30414	0.000952683	0.00482185
1110001J03Rik	335.625	0.0147079	0.127739	0.115141	0.908334	0.95277
1110002L01Rik	75.3493	0.706536	0.238255	2.96546	0.00302228	0.0129077
1110004E09Rik	556.788	-0.426477	0.0883432	-4.8275	1.38259e-06	1.38425e-05
1110004F10Rik	3262.14	-0.0145201	0.0737923	-0.19677	0.844008	0.916128
1110006O24Rik	63.6325	0.166609	0.212659	0.783459	0.433358	0.618909
1110007C09Rik	228.539	0.233795	0.132635	1.7627	0.0779516	0.181758
1110008F13Rik	964.88	-0.219708	0.0769484	-2.85527	0.00430001	0.0173441
1110008L16Rik	648.85	-0.418394	0.0698968	-5.98589	2.15213e-09	3.55938e-08
1110008P14Rik	304.021	-0.276885	0.121227	-2.28402	0.0223706	0.0681598
1110012L19Rik	557.071	-0.153276	0.102637	-1.49337	0.13534	0.274127
1110015O18Rik	0	NA	NA	NA	NA	NA
1110017D15Rik	5.53212	-0.0852112	0.605776	-0.140665	0.888135	0.942111
1110019D14Rik	152.148	0.485837	0.17216	2.82201	0.00477234	0.0188829
1110020A21Rik	17.0307	0.277117	0.407335	0.680317	0.496304	0.674823
1110025L11Rik	0	NA	NA	NA	NA	NA
1110028F11Rik	3.82747	0.320795	0.836734	0.383389	0.701431	0.830115
1110028F18Rik	0.37838	0.968101	3.21669	0.300962	0.763444	NA
1110032A03Rik	421.375	0.111593	0.102265	1.09122	0.275177	0.456805
1110032F04Rik	56.2911	-0.0500579	0.213136	-0.234863	0.814315	0.899204
1110034G24Rik	296.978	-0.0432594	0.12066	-0.358524	0.719951	0.842077
1110036E04Rik	0.170136	-0.562358	3.79869	-0.14804	0.882311	NA
1110037F02Rik	1980.3	0.10507	0.0814443	1.29008	0.197022	0.360105
1110038B12Rik	777.515	-0.154502	0.138471	-1.11577	0.264521	0.444453
1110038F14Rik	809.668	-0.0156511	0.112887	-0.138644	0.889732	0.942821
1110046J04Rik	58.669	0.25931	0.243888	1.06323	0.287677	0.471564
1110051M20Rik	513.891	0.167133	0.0873448	1.91348	0.0556864	0.139893
1110058D11Rik	0.216329	-0.562358	3.79869	-0.14804	0.882311	NA
1110059E24Rik	811.769	-0.217879	0.0931458	-2.33912	0.0193295	0.0604504
1110059G10Rik	445.949	0.0592773	0.110423	0.536818	0.591393	0.750949
1110065P20Rik	729.439	0.0938895	0.0995487	0.943151	0.345603	0.535769
1190002F15Rik	191.931	-0.182471	0.13413	-1.3604	0.173703	0.327969
1190002N15Rik	3425.18	0.219542	0.0682766	3.21548	0.00130226	0.0062786
1190003K10Rik	0.10194	-1.13943	3.79869	-0.299952	0.764214	NA
1190005I06Rik	4.05328	-0.430478	0.793088	-0.542787	0.587277	0.748082
1190007I07Rik	371.717	-0.317242	0.10027	-3.16388	0.00155679	0.00730814
1200014J11Rik	1536.29	-0.00468668	0.0824199	-0.0568635	0.954654	0.978019
1300002E11Rik	514.616	-0.366742	0.139575	-2.62757	0.00859969	0.0309474
1300017J02Rik	36.9915	0.21441	0.379878	0.564417	0.57247	0.736557
1500004A13Rik	370.586	0.179663	0.121021	1.48456	0.137661	0.277537
1500009C09Rik	1.81623	-1.29497	1.30745	-0.990455	0.321952	0.509794
1500009L16Rik	295.612	-1.62994	0.135554	-12.0243	2.64798e-33	7.45181e-31
1500011B03Rik	465.959	-0.141154	0.0862184	-1.63716	0.101596	0.222323
1500011K16Rik	285.733	0.12501	0.125345	0.997332	0.318603	0.506199
1500012F01Rik	856.969	-0.229799	0.114873	-2.00046	0.0454504	0.119399
1500012K07Rik	0.669716	-1.57456	2.12961	-0.739366	0.459685	NA
1500015A07Rik	228.465	-0.0880321	0.116588	-0.755068	0.450208	0.633652
1500015L24Rik	0	NA	NA	NA	NA	NA
1500015O10Rik	25.6679	0.109014	0.395578	0.275582	0.782869	0.882168
1500017E21Rik	1.14411	0.833364	1.70691	0.488228	0.625388	NA
1500026H17Rik	37.1101	0.310279	0.264918	1.17123	0.241507	0.416681
1600002D24Rik	2.07841	0.35628	1.14371	0.311513	0.755411	0.865029
1600002H07Rik	514.463	-0.281442	0.082693	-3.40346	0.000665383	0.00352788
1600002K03Rik	158.712	0.0715668	0.179427	0.398864	0.689994	0.822944
1600010M07Rik	1.08778	-0.467819	1.49162	-0.313632	0.753801	NA
1600012H06Rik	1653.17	-0.0102142	0.0605445	-0.168706	0.866028	0.929659
1600014C10Rik	664.059	0.0616511	0.0888614	0.693789	0.487814	0.667198
1600014C23Rik	2.72585	-0.498218	1.10112	-0.452466	0.650933	0.795981
1600014K23Rik	7.37767	-1.32368	0.68596	-1.92968	0.0536463	0.135782
1600015I10Rik	0	NA	NA	NA	NA	NA
1600019K03Rik	0.223712	0.967677	3.65832	0.264514	0.791384	NA
1600020E01Rik	344.336	-0.0520212	0.119624	-0.434872	0.663655	0.805493
1600023N17Rik	34.3541	-0.0284327	0.276643	-0.102778	0.918139	0.957776
1600025M17Rik	0.0859343	0.399408	3.79869	0.105143	0.916262	NA
1600027J07Rik	0.170709	0.989362	3.79756	0.260525	0.794459	NA
1600029I14Rik	0.655058	-0.319403	2.22905	-0.143291	0.88606	NA
1600029O15Rik	162.22	-0.19334	0.126818	-1.52455	0.127372	0.262405
1700001C02Rik	0.460166	0.986437	2.62869	0.375259	0.707468	NA
1700001C19Rik	1.70946	-0.688349	1.34458	-0.511944	0.608691	0.763608
1700001D01Rik	0.0681962	0.399408	3.79869	0.105143	0.916262	NA
1700001F09Rik	0	NA	NA	NA	NA	NA
1700001G01Rik	0	NA	NA	NA	NA	NA
1700001G11Rik	22.3926	0.100857	0.338426	0.29802	0.765688	0.87183
1700001G17Rik	28.0297	0.672448	0.338178	1.98844	0.0467626	0.122023
1700001J03Rik	2.51811	1.42088	1.16894	1.21554	0.224162	0.396823
1700001J11Rik	34.1138	0.104992	0.329423	0.318715	0.749943	0.861601
1700001K19Rik	6.00963	-0.773704	0.633889	-1.22057	0.22225	0.394087
1700001K23Rik	2.41701	1.94941	1.3403	1.45446	0.145818	0.289201
1700001L05Rik	857.247	0.895443	0.159587	5.61102	2.01141e-08	2.84774e-07
1700001L19Rik	25.376	0.318929	0.338286	0.942779	0.345794	0.535994
1700001O22Rik	28.2689	0.938727	0.347413	2.70205	0.00689129	0.0256889
1700001P01Rik	2.32194	-0.871719	1.19829	-0.727471	0.466937	0.648142
1700003C15Rik	0	NA	NA	NA	NA	NA
1700003D09Rik	0.253523	0.0275976	3.79756	0.00726718	0.994202	NA
1700003E16Rik	12.2619	0.235572	0.464361	0.507303	0.611942	0.765493
1700003E24Rik	0	NA	NA	NA	NA	NA
1700003F12Rik	38.3038	0.566752	0.352886	1.60605	0.108263	0.232769
1700003G13Rik	0.070741	-0.17767	3.79869	-0.0467714	0.962695	NA
1700003G18Rik	3.20733	1.73845	1.03165	1.68511	0.0919669	0.206336
1700003H04Rik	0	NA	NA	NA	NA	NA
1700003I22Rik	0	NA	NA	NA	NA	NA
1700003L19Rik	0	NA	NA	NA	NA	NA
1700003M02Rik	3.73869	-0.0566712	0.793921	-0.0713814	0.943094	0.971013
1700003M07Rik	15.1848	-0.97524	0.429069	-2.27292	0.0230309	0.0699107
1700003P14Rik	0	NA	NA	NA	NA	NA
1700006A11Rik	0.262495	-1.83631	3.77401	-0.486567	0.626565	NA
1700006E09Rik	0.10194	-1.13943	3.79869	-0.299952	0.764214	NA
1700006F04Rik	0.375455	0.026402	3.17244	0.00832229	0.99336	NA
1700006H21Rik	0.0877705	0.399408	3.79869	0.105143	0.916262	NA
1700007B14Rik	13.9225	-0.425693	0.50421	-0.844279	0.398514	0.587304
1700007F19Rik	0.411388	0.988017	3.11154	0.317533	0.750839	NA
1700007G11Rik	4.3153	0.992443	0.967684	1.02559	0.305087	0.491254
1700007J10Rik	12.0367	0.897844	0.634246	1.41561	0.15689	0.305099
1700007K09Rik	2.55344	-0.800398	0.970927	-0.824364	0.409733	0.597198
1700007K13Rik	93.3169	-1.84959	0.178581	-10.3571	3.88446e-25	4.86675e-23
1700007L15Rik	100.295	0.729051	0.206202	3.53561	0.000406832	0.00229613
1700007P06Rik	0.423224	0.0248101	2.66515	0.00930909	0.992573	NA
1700008C04Rik	0.0681962	0.399408	3.79869	0.105143	0.916262	NA
1700008J07Rik	169.434	0.422354	0.139218	3.03375	0.00241532	0.0106589
1700008K24Rik	0.162747	0.399399	3.79869	0.105141	0.916264	NA
1700008O03Rik	20.1437	0.696364	0.370691	1.87855	0.0603053	0.14923
1700008P02Rik	0	NA	NA	NA	NA	NA
1700009C05Rik	0.189101	-0.177679	3.79869	-0.0467737	0.962694	NA
1700009J07Rik	0.10194	-1.13943	3.79869	-0.299952	0.764214	NA
1700009N14Rik	0.909039	1.52566	1.96335	0.777071	0.437117	NA
1700010B08Rik	1.62042	2.50518	1.71182	1.46346	0.143342	0.285654
1700010D01Rik	0.207255	-0.17768	3.79869	-0.046774	0.962693	NA
1700010I02Rik	0	NA	NA	NA	NA	NA
1700010I14Rik	58.1965	0.256994	0.208438	1.23295	0.217593	0.387935
1700010J16Rik	0	NA	NA	NA	NA	NA
1700010K23Rik	0	NA	NA	NA	NA	NA
1700011A15Rik	4.87597	-0.262668	0.806929	-0.325516	0.74479	0.858673
1700011B04Rik	0.0945505	-0.17767	3.79869	-0.0467714	0.962695	NA
1700011C11Rik	0.39674	-2.12441	2.65213	-0.801019	0.423121	NA
1700011E24Rik	0.239939	0.00598235	3.57745	0.00167224	0.998666	NA
1700011H14Rik	0.253062	0.399398	3.50654	0.113901	0.909316	NA
1700011I03Rik	0.90303	-0.291897	1.71233	-0.170468	0.864642	NA
1700011L22Rik	0.866836	-0.683966	1.87262	-0.365245	0.714928	NA
1700011M02Rik	5.72955	-0.407322	0.625229	-0.651477	0.514739	0.690749
1700012A03Rik	0.10194	-1.13943	3.79869	-0.299952	0.764214	NA
1700012B07Rik	0.562139	-2.41995	2.05477	-1.17773	0.238905	NA
1700012B09Rik	1.57502	0.345757	1.22058	0.283272	0.776968	0.87931
1700012C14Rik	18.1003	-0.245844	0.35746	-0.687752	0.491609	0.670532
1700012D01Rik	20.3604	0.167512	0.381384	0.43922	0.660502	0.803104
1700012D14Rik	20.5497	0.674601	0.383862	1.75741	0.0788487	0.183264
1700012D16Rik	0.294874	0.988605	3.36396	0.293882	0.768848	NA
1700012H19Rik	0	NA	NA	NA	NA	NA
1700012I11Rik	0	NA	NA	NA	NA	NA
1700012L04Rik	1.13285	-0.109036	1.33794	-0.0814956	0.935048	NA
1700012P22Rik	0	NA	NA	NA	NA	NA
1700013D24Rik	0	NA	NA	NA	NA	NA
1700013F07Rik	0.772273	3.06626	3.17373	0.966138	0.333975	NA
1700013G24Rik	0.19649	-1.13944	3.79869	-0.299955	0.764212	NA
1700013H16Rik	790.898	2.07232	0.280466	7.38885	1.48106e-13	4.52281e-12
1700015E13Rik	2.01157	2.09711	2.04258	1.02669	0.304564	0.490682
1700015F17Rik	0.238103	0.00597509	3.58614	0.00166616	0.998671	NA
1700015G11Rik	0.199165	0.989362	3.79756	0.260525	0.794459	NA
1700016C15Rik	0.34727	-1.27099	3.19045	-0.398374	0.690355	NA
1700016D06Rik	2.33552	1.11289	1.08527	1.02545	0.305149	0.491311
1700016G22Rik	1.53864	-2.13103	1.39386	-1.52887	0.126297	0.260895
1700016H13Rik	1.40841	0.0427978	1.4096	0.0303618	0.975779	0.987932
1700016K19Rik	15.3701	1.03043	0.441364	2.33464	0.0195621	0.0610841
1700016L04Rik	1.5215	0.755637	1.51806	0.497766	0.618649	0.771229
1700016L21Rik	0	NA	NA	NA	NA	NA
1700016P04Rik	0	NA	NA	NA	NA	NA
1700017B05Rik	1591.22	-0.202297	0.0815924	-2.47937	0.0131616	0.0440209
1700017D01Rik	0	NA	NA	NA	NA	NA
1700017G19Rik	0.10194	-1.13943	3.79869	-0.299952	0.764214	NA
1700017J07Rik	0.534817	-0.48864	2.23467	-0.218663	0.826913	NA
1700017L05Rik	0	NA	NA	NA	NA	NA
1700017N19Rik	0	NA	NA	NA	NA	NA
1700018A04Rik	0	NA	NA	NA	NA	NA
1700018B08Rik	17.6728	0.127432	0.378922	0.336303	0.736643	0.853031
1700018B24Rik	126.892	0.905429	0.26965	3.3578	0.000785664	0.00407467
1700018C11Rik	0.205905	-1.13944	3.79869	-0.299955	0.764212	NA
1700018F24Rik	0.226257	0.399394	3.79869	0.10514	0.916265	NA
1700018G05Rik	1.35529	1.9569	1.67764	1.16646	0.243429	0.419126
1700018L02Rik	32.3948	0.208444	0.277329	0.751614	0.452283	0.635566
1700019A02Rik	11.3072	-1.90218	0.445472	-4.27003	1.95444e-05	0.000153899
1700019B03Rik	2.59428	-0.830186	1.17931	-0.703958	0.481459	0.661324
1700019B21Rik	4.33472	3.0511	1.16863	2.61082	0.00903245	0.0322446
1700019C18Rik	0.173705	0.989362	3.79756	0.260525	0.794459	NA
1700019D03Rik	75.5705	-2.9904	0.402508	-7.42943	1.0907e-13	3.4205e-12
1700019E08Rik	0.434462	-0.555756	2.58813	-0.214732	0.829976	NA
1700019G17Rik	448.87	0.378751	0.0931515	4.06597	4.78325e-05	0.000343523
1700019G24Rik	0.720235	-1.84143	1.71373	-1.07452	0.282592	NA
1700019L03Rik	25.1459	-0.665041	0.299647	-2.21941	0.0264589	0.0780999
1700019M22Rik	0	NA	NA	NA	NA	NA
1700019N19Rik	0.282334	-1.25923	3.77402	-0.333659	0.738637	NA
1700019O17Rik	0.609496	-2.01555	2.13491	-0.944095	0.345121	NA
1700020A23Rik	2.69062	1.6462	1.17626	1.39952	0.161658	0.311315
1700020D05Rik	14.7692	1.20894	0.510817	2.36667	0.0179487	0.0569008
1700020D14Rik	0	NA	NA	NA	NA	NA
1700020G17Rik	0.10194	-1.13943	3.79869	-0.299952	0.764214	NA
1700020I14Rik	801.394	-0.220341	0.284361	-0.774863	0.438421	0.622639
1700020L24Rik	171.447	-0.0141525	0.158089	-0.0895223	0.928667	0.964089
1700020M21Rik	0.69785	2.75776	2.77	0.995583	0.319453	NA
1700020N01Rik	7.63291	2.04921	0.69184	2.96197	0.00305674	0.0130353
1700020N15Rik	1.98467	-0.13804	1.24479	-0.110894	0.9117	0.954434
1700020N18Rik	0	NA	NA	NA	NA	NA
1700021F05Rik	804.543	-0.540297	0.0890026	-6.07058	1.27451e-09	2.19937e-08
1700021F07Rik	0.745986	2.9072	2.32362	1.25115	0.210881	NA
1700021K19Rik	1015.48	0.371001	0.0967806	3.83343	0.000126371	0.00081652
1700021N21Rik	0.715551	1.79231	1.87913	0.9538	0.340185	NA
1700022A21Rik	0	NA	NA	NA	NA	NA
1700022A22Rik	0	NA	NA	NA	NA	NA
1700022E09Rik	0	NA	NA	NA	NA	NA
1700022H01Rik	3.25915	2.20751	1.10211	2.00299	0.0451789	0.118908
1700022H16Rik	0	NA	NA	NA	NA	NA
1700022I11Rik	2.79486	1.80846	1.23651	1.46255	0.143591	0.285993
1700023C21Rik	0	NA	NA	NA	NA	NA
1700023F02Rik	0	NA	NA	NA	NA	NA
1700023F06Rik	20.052	-0.357158	0.350981	-1.0176	0.308869	0.495512
1700024B18Rik	0	NA	NA	NA	NA	NA
1700024F13Rik	10.8442	-0.321173	0.488514	-0.657448	0.510893	0.687513
1700024G13Rik	0.807252	-0.906527	2.18066	-0.415712	0.677621	NA
1700024I08Rik	0	NA	NA	NA	NA	NA
1700024N05Rik	0.319959	-0.177686	3.79869	-0.0467755	0.962692	NA
1700024P04Rik	0	NA	NA	NA	NA	NA
1700024P16Rik	1.55381	-0.075376	1.22372	-0.0615956	0.950885	0.975897
1700025B11Rik	0.0877705	0.399408	3.79869	0.105143	0.916262	NA
1700025C18Rik	0	NA	NA	NA	NA	NA
1700025F22Rik	0	NA	NA	NA	NA	NA
1700025F24Rik	4.04661	0.14009	0.757329	0.18498	0.853245	0.921287
1700025G04Rik	797.362	0.0744169	0.0722069	1.03061	0.302725	0.488828
1700025J12Rik	0.11439	0.399408	3.79869	0.105143	0.916262	NA
1700025K24Rik	0	NA	NA	NA	NA	NA
1700025M24Rik	0.15413	0.96758	3.79788	0.254768	0.798902	NA
1700025N23Rik	0.892579	1.36041	1.8626	0.730385	0.465155	NA
1700026D08Rik	393.281	0.313064	0.134504	2.32754	0.0199368	0.0620209
1700026D11Rik	0	NA	NA	NA	NA	NA
1700026F02Rik	0	NA	NA	NA	NA	NA
1700026J14Rik	7.09266	1.13128	0.588879	1.92107	0.054723	0.137878
1700026L06Rik	34.5688	0.736396	0.312246	2.35838	0.0183548	0.0578573
1700027A15Rik	0.10194	-1.13943	3.79869	-0.299952	0.764214	NA
1700027F06Rik	0	NA	NA	NA	NA	NA
1700027F09Rik	0.178523	-1.13944	3.79869	-0.299955	0.764212	NA
1700027H10Rik	0	NA	NA	NA	NA	NA
1700027I24Rik	0.257803	1.5349	3.77901	0.406165	0.684621	NA
1700027J07Rik	0.920809	-1.28158	2.34898	-0.545589	0.585349	NA
1700028B04Rik	0.240742	1.46103	3.547	0.411907	0.680408	NA
1700028D13Rik	0	NA	NA	NA	NA	NA
1700028E10Rik	78.4573	0.263024	0.207958	1.26479	0.205945	0.372432
1700028I16Rik	27.0686	-0.957395	0.299751	-3.19396	0.00140333	0.00669181
1700028J19Rik	30.9703	1.47778	0.365012	4.04858	5.15301e-05	0.000367338
1700028K03Rik	378.302	0.580197	0.135869	4.27027	1.95236e-05	0.000153839
1700028M03Rik	0	NA	NA	NA	NA	NA
1700028P14Rik	0.679751	0.526702	1.79875	0.292816	0.769663	NA
1700028P15Rik	0.621886	-2.7133	1.98993	-1.36352	0.17272	NA
1700029B22Rik	0	NA	NA	NA	NA	NA
1700029F12Rik	1.43905	0.492967	1.37406	0.358767	0.719769	0.842077
1700029H14Rik	0.549565	-1.94794	2.14089	-0.909875	0.362888	NA
1700029I15Rik	8.97646	0.426197	0.589268	0.723265	0.469517	0.650341
1700029J03Rik	0.0681962	0.399408	3.79869	0.105143	0.916262	NA
1700029J07Rik	290.95	1.11348	0.183334	6.07351	1.25144e-09	2.16774e-08
1700029M20Rik	20.021	1.85087	0.479507	3.85994	0.000113415	0.000740396
1700029N11Rik	0.0847751	0.399408	3.79869	0.105143	0.916262	NA
1700029P11Rik	34.2642	-1.32891	0.307489	-4.32181	1.54758e-05	0.000124268
1700030A11Rik	0.0859343	0.399408	3.79869	0.105143	0.916262	NA
1700030C10Rik	299.928	0.59063	0.154103	3.8327	0.000126747	0.000818288
1700030F04Rik	0.0847751	0.399408	3.79869	0.105143	0.916262	NA
1700030F18Rik	1.81184	-1.10852	1.10676	-1.00159	0.31654	0.503754
1700030J22Rik	98.68	0.0258767	0.193401	0.133798	0.893563	0.945201
1700030K09Rik	500.415	0.549458	0.104608	5.25254	1.50016e-07	1.80059e-06
1700030L20Rik	0	NA	NA	NA	NA	NA
1700030M09Rik	0.992264	1.87753	1.90834	0.983858	0.325185	NA
1700030N03Rik	0	NA	NA	NA	NA	NA
1700030O20Rik	0.111355	-1.13943	3.79869	-0.299952	0.764214	NA
1700031A10Rik	0.212223	-0.177681	3.79869	-0.0467742	0.962693	NA
1700031F05Rik	6.76206	5.16884	1.26073	4.09986	4.13394e-05	0.000302593
1700031M16Rik	0	NA	NA	NA	NA	NA
1700031P21Rik	0.11439	0.399408	3.79869	0.105143	0.916262	NA
1700034E13Rik	0	NA	NA	NA	NA	NA
1700034G24Rik	0	NA	NA	NA	NA	NA
1700034H15Rik	54.4986	1.42643	0.22949	6.21565	5.11139e-10	9.40618e-09
1700034I23Rik	5.70087	3.70589	1.15605	3.20565	0.00134757	0.00646638
1700034J05Rik	0.250292	-0.562366	3.53104	-0.159264	0.873461	NA
1700034K08Rik	0	NA	NA	NA	NA	NA
1700034O15Rik	0.824272	-0.740399	1.78337	-0.41517	0.678018	NA
1700034P13Rik	5.07099	0.752133	0.712575	1.05551	0.29119	0.475407
1700036G14Rik	0	NA	NA	NA	NA	NA
1700037C18Rik	114.337	0.577627	0.182541	3.16436	0.00155425	0.00729943
1700037H04Rik	1321.22	-0.3021	0.0810162	-3.72888	0.000192332	0.00118496
1700039E15Rik	0.38719	0.0250173	2.71849	0.00920265	0.992657	NA
1700039E22Rik	0.236944	0.00597049	3.59168	0.00166231	0.998674	NA
1700040L02Rik	30.2485	0.383505	0.322152	1.19045	0.23387	0.408038
1700041A01Rik	0.266871	-0.562366	3.4608	-0.162496	0.870916	NA
1700041C23Rik	0	NA	NA	NA	NA	NA
1700041M19Rik	0	NA	NA	NA	NA	NA
1700042G07Rik	2.11533	-0.733698	1.01228	-0.724795	0.468578	0.64963
1700042G15Rik	0.0847751	0.399408	3.79869	0.105143	0.916262	NA
1700042O10Rik	3.51345	2.54326	1.2154	2.09253	0.0363911	0.100373
1700044C05Rik	1.13807	1.93278	1.60047	1.20763	0.227189	NA
1700044K03Rik	0	NA	NA	NA	NA	NA
1700045H11Rik	0.591945	-0.331174	1.8947	-0.17479	0.861245	NA
1700046C09Rik	0.10194	-1.13943	3.79869	-0.299952	0.764214	NA
1700047A11Rik	0.532104	-1.40752	2.06876	-0.680367	0.496272	NA
1700047E10Rik	0.939082	-2.69333	1.76097	-1.52945	0.126152	NA
1700047G03Rik	0.070741	-0.17767	3.79869	-0.0467714	0.962695	NA
1700047I17Rik2	0	NA	NA	NA	NA	NA
1700047L14Rik	0.357862	1.55761	3.77792	0.412294	0.680124	NA
1700047M11Rik	0.948637	-1.48031	1.73609	-0.852664	0.393845	NA
1700048M11Rik	12.6642	-0.0214792	0.447462	-0.0480022	0.961714	0.981218
1700048O20Rik	306.625	0.715785	0.140236	5.10414	3.32306e-07	3.72394e-06
1700049E15Rik	0	NA	NA	NA	NA	NA
1700049E22Rik	0.250782	1.42571	3.78445	0.376728	0.706376	NA
1700049G17Rik	423.328	0.481509	0.142811	3.37165	0.000747199	0.00390508
1700049L16Rik	1.58608	0.686482	1.44207	0.476039	0.634047	0.783431
1700051A21Rik	0.187874	-0.562358	3.79869	-0.14804	0.882311	NA
1700052I22Rik	0.39298	-2.08082	3.69555	-0.563063	0.573392	NA
1700052K11Rik	269.346	0.737412	0.121098	6.08939	1.13342e-09	1.97265e-08
1700054A03Rik	0.69187	2.43687	2.11047	1.15466	0.248231	NA
1700054K19Rik	0	NA	NA	NA	NA	NA
1700054M17Rik	0.156675	0.399399	3.79869	0.105141	0.916264	NA
1700055C04Rik	0	NA	NA	NA	NA	NA
1700056E22Rik	17.8903	0.0523106	0.347414	0.150572	0.880314	0.937566
1700057G04Rik	0.203879	-2.08097	3.74916	-0.555049	0.578861	NA
1700057H15Rik	0	NA	NA	NA	NA	NA
1700057H21Rik	0.305819	-2.66754	3.70377	-0.720224	0.471387	NA
1700060C16Rik	0	NA	NA	NA	NA	NA
1700060C20Rik	0.768428	-2.17542	1.74432	-1.24714	0.212346	NA
1700061F12Rik	0.0839723	-1.13943	3.79869	-0.299952	0.764214	NA
1700061G19Rik	90.1895	-2.05832	0.262776	-7.83301	4.76341e-15	1.76381e-13
1700061I17Rik	0.254911	0.00604068	3.50994	0.00172102	0.998627	NA
1700061J23Rik	0.0859343	0.399408	3.79869	0.105143	0.916262	NA
1700063A18Rik	0	NA	NA	NA	NA	NA
1700063D05Rik	0.543742	0.0230628	2.30756	0.00999444	0.992026	NA
1700063O14Rik	0	NA	NA	NA	NA	NA
1700064J06Rik	0	NA	NA	NA	NA	NA
1700064M15Rik	0.730733	-1.53308	2.18401	-0.701957	0.482706	NA
1700065D16Rik	3.42305	1.14303	0.922382	1.23921	0.215266	0.385138
1700065I16Rik	0.695103	2.20677	2.18955	1.00787	0.313518	NA
1700065J11Rik	0.0945505	-0.17767	3.79869	-0.0467714	0.962695	NA
1700065J18Rik	0.726306	-1.85056	1.85567	-0.997247	0.318645	NA
1700065L07Rik	0	NA	NA	NA	NA	NA
1700065O20Rik	0.264101	0.989353	3.79756	0.260523	0.79446	NA
1700066B17Rik	3.64478	1.30252	1.01435	1.2841	0.199107	0.362756
1700066B19Rik	16.9232	0.809219	0.443354	1.82522	0.067968	0.163416
1700066J03Rik	1.38542	-0.425544	1.31542	-0.323503	0.746315	0.859672
1700066M21Rik	441.62	0.121126	0.0939356	1.28946	0.19724	0.360412
1700066N21Rik	0	NA	NA	NA	NA	NA
1700066O22Rik	1.33783	0.366938	1.61177	0.227662	0.819909	0.901959
1700067G17Rik	0	NA	NA	NA	NA	NA
1700067K01Rik	36.9057	-0.0798357	0.260887	-0.306016	0.759592	0.868024
1700067P10Rik	0.484298	-1.50052	2.96887	-0.505419	0.613265	NA
1700069L16Rik	0.250067	0.399398	3.51974	0.113474	0.909655	NA
1700069P05Rik	0	NA	NA	NA	NA	NA
1700071K01Rik	47.4385	-1.01218	0.223483	-4.52911	5.92322e-06	5.16679e-05
1700071M16Rik	4.60353	1.19545	0.849435	1.40735	0.159325	0.308402
1700072B07Rik	0	NA	NA	NA	NA	NA
1700072I22Rik	0.156675	0.399399	3.79869	0.105141	0.916264	NA
1700072O05Rik	0	NA	NA	NA	NA	NA
1700073E17Rik	7.01561	0.621531	0.593241	1.04769	0.294783	0.479773
1700074H08Rik	0	NA	NA	NA	NA	NA
1700074P13Rik	0	NA	NA	NA	NA	NA
1700080E11Rik	0	NA	NA	NA	NA	NA
1700080N15Rik	0.111355	-1.13943	3.79869	-0.299952	0.764214	NA
1700080O16Rik	15.1846	-0.852699	0.422148	-2.01991	0.0433931	0.115153
1700081H04Rik	0.236033	-0.177682	3.79869	-0.0467745	0.962693	NA
1700084C01Rik	2.20613	-0.127061	1.16824	-0.108763	0.913391	0.955165
1700084D21Rik	0	NA	NA	NA	NA	NA
1700084E18Rik	15.7754	0.238386	0.424739	0.561252	0.574626	0.738424
1700084F23Rik	0.154713	-1.13944	3.79869	-0.299955	0.764212	NA
1700084J12Rik	86.7831	-0.130415	0.16688	-0.781486	0.434517	0.619922
1700084M14Rik	0.225744	-0.562358	3.79869	-0.14804	0.882311	NA
1700085C21Rik	0.170136	-0.562358	3.79869	-0.14804	0.882311	NA
1700086L19Rik	0.423658	-0.338529	2.61019	-0.129695	0.896807	NA
1700086O06Rik	150.557	0.0430865	0.164128	0.262518	0.792922	0.887483
1700088E04Rik	16.6531	0.24067	0.394209	0.610515	0.541521	0.712677
1700091H14Rik	0.0945505	-0.17767	3.79869	-0.0467714	0.962695	NA
1700092C02Rik	0	NA	NA	NA	NA	NA
1700092C10Rik	0.112704	-0.17767	3.79869	-0.0467714	0.962695	NA
1700092E19Rik	0.070741	-0.17767	3.79869	-0.0467714	0.962695	NA
1700092K14Rik	2.19142	-0.255778	1.08199	-0.236396	0.813125	0.898441
1700092M07Rik	8.10366	0.555707	0.613028	0.906495	0.364674	0.554805
1700093K21Rik	4.4895	-0.170333	0.74783	-0.227769	0.819826	0.901922
1700094D03Rik	249.55	-0.248514	0.169014	-1.47038	0.14146	0.282947
1700094J05Rik	0.656327	0.201657	1.96801	0.102467	0.918386	NA
1700094M24Rik	0.0877705	0.399408	3.79869	0.105143	0.916262	NA
1700095A21Rik	1.28878	-0.0985994	1.74364	-0.0565479	0.954905	0.978125
1700095B10Rik	0	NA	NA	NA	NA	NA
1700095J12Rik	0.0681962	0.399408	3.79869	0.105143	0.916262	NA
1700096J18Rik	1.35762	0.407825	1.85961	0.219307	0.826411	0.905734
1700096K18Rik	126.393	-0.335762	0.175174	-1.91673	0.0552721	0.139032
1700096P03Rik	0.171869	0.989362	3.79756	0.260525	0.794459	NA
1700097N02Rik	29.0192	-1.20589	0.433728	-2.78029	0.00543102	0.0210465
1700099I09Rik	5.36392	0.395127	0.691897	0.571077	0.567947	0.732489
1700100I10Rik	66.1224	-0.197544	0.237856	-0.830519	0.406246	0.593914
1700100L14Rik	0	NA	NA	NA	NA	NA
1700101E01Rik	13.8909	0.188251	0.481213	0.391201	0.695649	0.826072
1700101I11Rik	4.21338	-1.2027	0.759447	-1.58366	0.113272	0.24059
1700101O22Rik	0	NA	NA	NA	NA	NA
1700102H20Rik	9.99085	-0.329351	0.535606	-0.614912	0.538613	0.710097
1700102P08Rik	19.1912	0.0112133	0.403787	0.0277704	0.977845	0.989038
1700104L18Rik	0	NA	NA	NA	NA	NA
1700105P06Rik	5.69162	0.209002	0.741348	0.281921	0.778004	0.879608
1700106J16Rik	475.301	-0.494726	0.184694	-2.67863	0.00739234	0.0273008
1700108F19Rik	16.1162	-0.631926	0.39431	-1.60261	0.109021	0.233787
1700108J01Rik	0	NA	NA	NA	NA	NA
1700109G14Rik	0.336417	0.968678	2.82353	0.343073	0.731543	NA
1700109G15Rik	0.383391	-1.395	2.66585	-0.523284	0.600776	NA
1700109H08Rik	11.3767	0.351966	0.501178	0.702277	0.482506	0.662166
1700109I08Rik	0	NA	NA	NA	NA	NA
1700109K24Rik	12.2943	1.32614	0.740448	1.79099	0.0732942	0.173396
1700110C19Rik	8.55826	0.410056	0.552665	0.741961	0.458111	0.64041
1700110I01Rik	3.02721	0.845661	1.22506	0.690302	0.490004	0.669231
1700110I07Rik	1.3708	0.566469	1.3374	0.423558	0.671888	0.810644
1700110K17Rik	0.0877705	0.399408	3.79869	0.105143	0.916262	NA
1700111N16Rik	0.175541	0.989362	3.79756	0.260525	0.794459	NA
1700112E06Rik	6.26823	0.297419	0.630393	0.4718	0.63707	0.785906
1700112H15Rik	2.17812	2.87434	1.46411	1.96319	0.0496239	0.127938
1700112J05Rik	0.893628	-1.54408	1.62127	-0.952387	0.340901	NA
1700112J16Rik	7.99998	0.281641	0.660517	0.426395	0.66982	0.809217
1700113A16Rik	277.562	-0.0323872	0.139171	-0.232715	0.815983	0.899967
1700113B09Rik	0.787927	0.932538	1.86426	0.500218	0.616922	NA
1700113H08Rik	0.523418	1.96414	2.27188	0.864543	0.38729	NA
1700116B05Rik	0	NA	NA	NA	NA	NA
1700119H24Rik	1.8215	0.0588243	1.2996	0.0452634	0.963897	0.982269
1700120C14Rik	14.9485	0.567788	0.447008	1.2702	0.204015	0.369745
1700120E14Rik	0.982516	-0.475312	1.70035	-0.279538	0.779832	NA
1700120G07Rik	0	NA	NA	NA	NA	NA
1700120K04Rik	10.3775	0.300057	0.516618	0.580809	0.561369	0.728244
1700121L16Rik	0	NA	NA	NA	NA	NA
1700121N20Rik	1.66496	-3.49672	1.53097	-2.28399	0.0223722	0.0681598
1700122C19Rik	0	NA	NA	NA	NA	NA
1700122O11Rik	0.0847751	0.399408	3.79869	0.105143	0.916262	NA
1700123I01Rik	355.107	5.42683	0.393126	13.8043	2.40049e-43	1.68884e-40
1700123J17Rik	2.18897	-2.70909	1.16023	-2.33496	0.0195456	0.0610429
1700123K08Rik	0.20894	0.399399	3.79869	0.105141	0.916264	NA
1700123L14Rik	0.310519	0.0267267	3.31053	0.00807325	0.993559	NA
1700123M08Rik	24.7781	0.168364	0.316869	0.531338	0.595185	0.75406
1700123O12Rik	0	NA	NA	NA	NA	NA
1700123O20Rik	1023.75	-0.0290751	0.092138	-0.315561	0.752336	0.862859
1700123O21Rik	0.326676	1.87015	2.7558	0.678625	0.497376	NA
1700124L16Rik	6.19484	-0.519436	0.662871	-0.783616	0.433266	0.618909
1700125G02Rik	0	NA	NA	NA	NA	NA
1700125G22Rik	3.10036	0.991779	0.974235	1.01801	0.308674	0.495334
1700125H03Rik	2.78301	0.862896	0.985097	0.875951	0.381057	0.570794
1700125H20Rik	5.47389	2.27585	0.87992	2.58643	0.00969765	0.0342054
1700126H18Rik	0.0945505	-0.17767	3.79869	-0.0467714	0.962695	NA
1700128A07Rik	0.480937	-1.40134	2.30784	-0.607207	0.543714	NA
1700128F08Rik	0.282611	-0.562366	3.40371	-0.165221	0.86877	NA
1700129C05Rik	0	NA	NA	NA	NA	NA
1810006J02Rik	6.91889	0.444254	0.750106	0.592255	0.55368	0.722699
1810007C17Rik	0	NA	NA	NA	NA	NA
1810007D17Rik	0.400799	1.62664	2.69583	0.60339	0.546249	NA
1810008I18Rik	1.30792	-0.955743	1.5242	-0.627045	0.53063	0.70492
1810009A15Rik	92.5787	-0.376665	0.244014	-1.54362	0.122681	0.25527
1810009J06Rik	0.0847751	0.399408	3.79869	0.105143	0.916262	NA
1810010D01Rik	28.2607	0.644886	0.311134	2.0727	0.0382005	0.104371
1810010H24Rik	41.6852	0.0710579	0.253965	0.279794	0.779636	0.880206
1810011H11Rik	12.2554	-0.00587864	0.55313	-0.010628	0.99152	0.996507
1810011O10Rik	453.757	-0.153753	0.089526	-1.71741	0.0859037	0.195868
1810012K16Rik	8.00487	0.43424	0.573638	0.756992	0.449055	0.632682
1810013A23Rik	0.168747	-0.562358	3.79869	-0.14804	0.882311	NA
1810013L24Rik	1427.01	-0.0626428	0.0785863	-0.797121	0.425381	0.61152
1810014B01Rik	274.688	0.0397244	0.103514	0.38376	0.701157	0.829972
1810018F18Rik	0	NA	NA	NA	NA	NA
1810019D21Rik	76.8087	-0.0575169	0.211433	-0.272033	0.785596	0.883283
1810020O05Rik	10.2192	-0.52268	0.451921	-1.15657	0.247447	0.423771
1810021B22Rik	24.924	0.444195	0.314808	1.41101	0.158243	0.306889
1810022K09Rik	754.554	-0.367764	0.110078	-3.34093	0.000834974	0.00429993
1810024B03Rik	17.2803	0.540543	0.367292	1.4717	0.141103	0.282607
1810026B05Rik	721.938	-0.0296213	0.0933377	-0.317356	0.750973	0.861944
1810026J23Rik	1481.73	0.583689	0.104318	5.59529	2.20256e-08	3.08966e-07
1810030O07Rik	1564.74	-0.106401	0.107905	-0.986057	0.324105	0.512096
1810032O08Rik	415.551	-0.413341	0.108035	-3.826	0.000130243	0.000837106
1810034E14Rik	60.6776	0.24429	0.208116	1.17382	0.240468	0.415869
1810037I17Rik	928.69	-0.576387	0.103396	-5.57458	2.48132e-08	3.44303e-07
1810041H14Rik	12.3335	0.492334	0.43194	1.13982	0.25436	0.431811
1810041L15Rik	129.624	0.248572	0.22825	1.08903	0.276139	0.457821
1810043G02Rik	481.059	0.45536	0.111299	4.09134	4.28893e-05	0.000312498
1810043H04Rik	384.008	0.0589848	0.125383	0.470438	0.638042	0.786468
1810044D09Rik	67.8673	0.35504	0.250256	1.41871	0.155984	0.303765
1810046K07Rik	0.11439	0.399408	3.79869	0.105143	0.916262	NA
1810053B23Rik	1.61527	-0.342	1.69262	-0.202054	0.839875	0.913766
1810055G02Rik	620.82	-0.119213	0.106653	-1.11777	0.263667	0.44334
1810058I24Rik	1559.3	-0.11931	0.103292	-1.15508	0.24806	0.424344
1810062G17Rik	21.0968	0.237084	0.338424	0.700553	0.483582	0.663145
1810062O18Rik	10.1183	0.0439867	0.500835	0.0878266	0.930014	0.964831
1810063I02Rik	12.0822	0.0511642	0.48897	0.104637	0.916664	0.95722
1810064F22Rik	140.19	0.299931	0.182502	1.64343	0.100293	0.220157
1810065E05Rik	5.86773	0.116966	0.690398	0.169419	0.865467	0.929275
2010001A14Rik	45.6795	0.792997	0.250765	3.16231	0.00156521	0.00733936
2010001E11Rik	57.3266	0.311721	0.292792	1.06465	0.287035	0.470892
2010003K11Rik	3.60361	0.740615	0.884396	0.837425	0.402354	0.590531
2010005H15Rik	37.9278	-0.225299	1.39227	-0.161822	0.871446	0.932536
2010009K17Rik	12.2772	-0.45	0.451607	-0.996441	0.319036	0.506668
2010010A06Rik	29.609	0.126076	0.295778	0.426253	0.669923	0.809288
2010012O05Rik	463.144	0.329679	0.0819554	4.02267	5.7543e-05	0.000405305
2010016I18Rik	1.641	2.4796	1.56959	1.57977	0.114159	0.242184
2010106C02Rik	0.248681	0.967779	3.53734	0.27359	0.7844	NA
2010106E10Rik	0	NA	NA	NA	NA	NA
2010107E04Rik	1512.59	-0.156466	0.0894776	-1.74866	0.0803499	0.185927
2010107G12Rik	25.4369	0.0405104	0.330001	0.122758	0.902298	0.94981
2010107G23Rik	97.475	-0.86028	0.198695	-4.32965	1.49344e-05	0.000120132
2010109A12Rik	10.3506	1.5267	0.584112	2.61371	0.00895644	0.0320108
2010109I03Rik	3.05393	0.420897	0.875633	0.480677	0.630746	0.780834
2010111I01Rik	964.826	-0.146687	0.0757062	-1.93758	0.0526744	0.133929
2010204K13Rik	262.98	-0.134552	0.121261	-1.10961	0.267168	0.447402
2010300C02Rik	118.844	-0.76198	0.226347	-3.36643	0.000761481	0.00396951
2010308F09Rik	3.42851	0.131895	0.91063	0.14484	0.884837	0.940282
2010310C07Rik	0.224872	0.967682	3.65231	0.264951	0.791047	NA
2010315B03Rik	551.191	0.177511	0.102537	1.73119	0.0834176	0.191308
2010320M18Rik	341.48	0.0239849	0.142327	0.168519	0.866175	0.929667
2200002D01Rik	36.5201	0.0553833	0.304884	0.181654	0.855855	0.922854
2200002J24Rik	63.8848	-0.118191	0.207876	-0.568563	0.569653	0.734117
2210010C04Rik	0.40095	0.989265	3.74471	0.264177	0.791644	NA
2210011C24Rik	25.7251	-0.678699	0.363692	-1.86614	0.0620223	0.15255
2210013O21Rik	617.697	-0.0923484	0.102521	-0.900775	0.367708	0.557721
2210015D19Rik	189.982	-0.066229	0.138813	-0.477109	0.633285	0.78297
2210016F16Rik	1068.45	-0.00676618	0.0680728	-0.0993963	0.920824	0.959154
2210016L21Rik	701.96	-0.00883599	0.0987075	-0.0895169	0.928671	0.964089
2210018M11Rik	945.091	0.580137	0.153131	3.78851	0.000151554	0.000961245
2210019I11Rik	0.224059	-1.13944	3.79869	-0.299955	0.764212	NA
2210039B01Rik	0.794105	0.453055	1.68057	0.269585	0.78748	NA
2210404E10Rik	0.290905	-1.61681	3.73898	-0.43242	0.665436	NA
2210404O09Rik	293.28	0.243814	0.137432	1.77407	0.0760523	0.17849
2210406O10Rik	31.382	1.10239	0.344282	3.20199	0.00136481	0.00653538
2210407C18Rik	1.55237	-1.48434	1.46481	-1.01334	0.310899	0.497808
2210408F21Rik	0.580863	1.88506	2.04438	0.922069	0.356492	NA
2210408I21Rik	175.708	0.108361	0.169323	0.639966	0.522195	0.697786
2210409D07Rik	0.10194	-1.13943	3.79869	-0.299952	0.764214	NA
2210409E12Rik	22.056	0.268732	0.382797	0.702022	0.482666	0.66226
2210414B05Rik	0	NA	NA	NA	NA	NA
2210416O15Rik	21.9833	0.705278	0.37858	1.86295	0.0624687	0.153334
2210417A02Rik	10.3377	-0.419125	0.479868	-0.873417	0.382436	0.57195
2210420H20Rik	0.400522	0.792978	3.14201	0.252379	0.800748	NA
2300002M23Rik	2.21712	1.03112	1.2056	0.855277	0.392398	0.581476
2300003K06Rik	0	NA	NA	NA	NA	NA
2300005B03Rik	0.170709	0.989362	3.79756	0.260525	0.794459	NA
2300009A05Rik	183.939	0.00804084	0.151481	0.0530817	0.957667	0.979437
2310001H17Rik	5.93404	-1.161	0.700639	-1.65706	0.0975083	0.215517
2310001K24Rik	0.632495	-0.6019	2.07852	-0.289581	0.772137	NA
2310002D06Rik	0.996828	0.943442	1.68323	0.560494	0.575142	NA
2310002F09Rik	5.20921	-0.0300317	0.72581	-0.0413768	0.966996	0.983762
2310002L09Rik	0.799697	2.92918	2.3156	1.26498	0.205879	NA
2310003N18Rik	0.280905	0.0275976	3.79756	0.00726718	0.994202	NA
2310005A03Rik	0.917701	2.5284	1.70793	1.48039	0.13877	NA
2310005E17Rik	0	NA	NA	NA	NA	NA
2310007B03Rik	17.0574	-0.270939	0.434712	-0.623261	0.533113	0.706647
2310008N11Rik	3.4421	1.13795	0.97595	1.16599	0.243618	0.419389
2310009A05Rik	248.486	0.0506071	0.118804	0.425971	0.670129	0.809465
2310009B15Rik	349.482	0.0133057	0.103196	0.128936	0.897409	0.947367
2310010G23Rik	78.2599	-0.378051	0.193028	-1.95853	0.0501678	0.12894
2310010J17Rik	89.7147	0.472799	0.183425	2.57761	0.00994864	0.0349224
2310011J03Rik	640.79	-0.0526275	0.120144	-0.438038	0.661359	0.803665
2310015A10Rik	674.745	0.0550984	0.0972295	0.566684	0.570929	0.735349
2310015D24Rik	0.0847751	0.399408	3.79869	0.105143	0.916262	NA
2310016D03Rik	0	NA	NA	NA	NA	NA
2310020H05Rik	0.179551	-0.562358	3.79869	-0.14804	0.882311	NA
2310022A10Rik	581.775	-0.461043	0.0829967	-5.55496	2.77675e-08	3.81324e-07
2310022B05Rik	1536.65	-0.0434447	0.0991526	-0.43816	0.66127	0.803646
2310030A07Rik	0.641376	-0.59143	2.34228	-0.252501	0.800653	NA
2310030G06Rik	208.264	-0.639573	0.134578	-4.75244	2.00977e-06	1.95131e-05
2310033P09Rik	655.649	0.0557513	0.083247	0.66971	0.503043	0.680546
2310034C09Rik	0	NA	NA	NA	NA	NA
2310034G01Rik	55.5566	0.329925	0.24765	1.33222	0.182787	0.34069
2310034O05Rik	1.06899	-0.539033	1.65857	-0.324998	0.745183	NA
2310035C23Rik	1238.09	0.541332	0.123853	4.37075	1.2382e-05	0.000100842
2310036O22Rik	2102.67	-0.303477	0.0813314	-3.73136	0.000190447	0.00117493
2310039H08Rik	417.095	-0.101197	0.136671	-0.74044	0.459033	0.641219
2310039L15Rik	2.09202	0.140786	1.18415	0.118891	0.905361	0.951337
2310040G24Rik	42.8594	-0.261973	0.26834	-0.976274	0.328929	0.517349
2310043L19Rik	4.20765	0.0850065	0.72205	0.117729	0.906282	0.951867
2310043O21Rik	0.070741	-0.17767	3.79869	-0.0467714	0.962695	NA
2310045N01Rik	719.95	0.0852861	0.104803	0.813777	0.415773	0.60307
2310045n01rik-mef2b	0	NA	NA	NA	NA	NA
2310047M10Rik	274.296	0.164984	0.144199	1.14414	0.252566	0.429684
2310050C09Rik	0.199125	-0.562358	3.79869	-0.14804	0.882311	NA
2310057J18Rik	0	NA	NA	NA	NA	NA
2310057M21Rik	441.132	-0.136705	0.112959	-1.21022	0.226196	0.399496
2310057N15Rik	0	NA	NA	NA	NA	NA
2310061I04Rik	1044.59	0.6339	0.140136	4.52346	6.08365e-06	5.29915e-05
2310061N02Rik	0	NA	NA	NA	NA	NA
2310065F04Rik	0.205905	-1.13944	3.79869	-0.299955	0.764212	NA
2310067B10Rik	1414.08	0.322235	0.0588214	5.47819	4.2969e-08	5.69144e-07
2310068J16Rik	44.0067	0.230485	0.28414	0.811167	0.41727	0.604666
2310069B03Rik	3.55142	0.805312	0.853226	0.943844	0.345249	0.535331
2310069G16Rik	1.62599	0.35401	1.15907	0.305425	0.760043	0.868376
2310075C17Rik	0	NA	NA	NA	NA	NA
2310079G19Rik	0	NA	NA	NA	NA	NA
2310081J21Rik	2.91295	-0.582973	1.02114	-0.570903	0.568065	0.732538
2400006E01Rik	3.30856	-1.59005	0.860234	-1.84839	0.0645457	0.157109
2410002F23Rik	2894.03	-0.197228	0.0714256	-2.76131	0.00575707	0.0221282
2410003L11Rik	30.6032	-1.87312	0.304648	-6.14848	7.82278e-10	1.3974e-08
2410004B18Rik	472.57	-0.577904	0.0841603	-6.8667	6.57023e-12	1.61536e-10
2410004I01Rik	10.7218	-0.348825	0.446451	-0.781328	0.43461	0.619922
2410004P03Rik	10.8485	0.34187	0.57069	0.599046	0.549142	0.719321
2410006H16Rik	655.454	-0.317483	0.152099	-2.08734	0.0368575	0.101413
2410012E07Rik	34.2719	-0.879558	0.308361	-2.85236	0.00433959	0.017473
2410015M20Rik	1295.77	-0.0401494	0.103537	-0.387779	0.69818	0.827949
2410016O06Rik	670.899	-0.529352	0.0955508	-5.54	3.02463e-08	4.1227e-07
2410017I17Rik	15.4661	-3.19028	0.482827	-6.60751	3.90835e-11	8.59273e-10
2410018L13Rik	238.014	0.165677	0.118313	1.40033	0.161416	0.310966
2410021H03Rik	3.19318	-1.46232	1.24413	-1.17538	0.239842	0.41515
2410089E03Rik	1377.04	0.61868	0.119183	5.19099	2.09174e-07	2.43708e-06
2410124H12Rik	3.01147	-1.47909	0.872438	-1.69535	0.0900091	0.202814
2410127L17Rik	1374.62	-0.379316	0.0923563	-4.10709	4.00669e-05	0.000294781
2410131K14Rik	246.235	0.0130688	0.123949	0.105437	0.916029	0.956666
2410137M14Rik	2.62938	0.150726	0.923174	0.163269	0.870307	0.931829
2410141K09Rik	47.074	-1.35586	0.299347	-4.52939	5.91542e-06	5.16245e-05
2500002B13Rik	57.0178	-1.22394	0.24879	-4.91955	8.6743e-07	9.03075e-06
2500004C02Rik	837.717	0.149333	0.0985139	1.51586	0.129556	0.265633
2510002D24Rik	359.574	-0.0800126	0.0930125	-0.860234	0.38966	0.578779
2510003B16Rik	17.0478	-0.062092	0.392249	-0.158298	0.874222	0.934233
2510009E07Rik	868.308	0.163088	0.0840139	1.9412	0.0522343	0.133097
2510039O18Rik	1394.64	0.0322422	0.0899521	0.358438	0.720016	0.842077
2610001J05Rik	750.724	-0.0183843	0.0923652	-0.199039	0.842232	0.915162
2610002M06Rik	604.489	0.0152945	0.0935566	0.163479	0.870142	0.931829
2610005L07Rik	1641.09	0.282762	0.281455	1.00465	0.315068	0.501936
2610008E11Rik	1822.69	0.166137	0.0847675	1.95991	0.0500065	0.128667
2610015P09Rik	472.751	0.440326	0.128407	3.42914	0.00060549	0.00325562
2610016A17Rik	0.19748	0.399399	3.79869	0.105141	0.916264	NA
2610020C07Rik	189.905	0.172499	0.117513	1.46791	0.142129	0.283776
2610020H08Rik	483.149	0.609723	0.149449	4.07981	4.50725e-05	0.000326392
2610027K06Rik	58.1962	0.0730873	0.214264	0.341108	0.733022	0.850196
2610028E06Rik	541.92	0.228233	0.0907315	2.51548	0.0118871	0.0405971
2610028H24Rik	0.247522	0.967775	3.54254	0.273187	0.78471	NA
2610035D17Rik	245.5	0.236815	0.129239	1.83239	0.066894	0.161449
2610035F20Rik	4.4242	0.331207	0.806396	0.410725	0.681274	0.817386
2610037D02Rik	12.0756	-1.69925	0.504942	-3.36524	0.000764774	0.00398327
2610042L04Rik	19.1015	0.272669	0.347665	0.784288	0.432871	0.618806
2610044O15Rik8	380.44	-0.342215	0.112862	-3.03215	0.00242817	0.0107053
2610100L16Rik	9.866	6.2945	1.25731	5.00631	5.5484e-07	5.95699e-06
2610203C22Rik	8.29182	-0.0391984	0.53625	-0.0730973	0.941729	0.970266
2610206C17Rik	25.3007	0.108386	0.314323	0.344825	0.730226	0.848533
2610301B20Rik	799.059	0.17251	0.0744107	2.31835	0.0204303	0.0633087
2610305D13Rik	856.206	-1.38662	0.150558	-9.20992	3.26361e-20	2.28728e-18
2610306M01Rik	166.442	0.507864	0.14869	3.41559	0.000636448	0.0033981
2610307P16Rik	62.1969	-0.414642	0.22833	-1.81598	0.0693736	0.16601
2610316D01Rik	11.6919	0.0880709	0.465058	0.189376	0.849798	0.919141
2610318N02Rik	172.287	-0.228989	0.149602	-1.53065	0.125856	0.260248
2610507B11Rik	4616.68	-0.153805	0.0985233	-1.56111	0.118499	0.248918
2610507I01Rik	1266.01	0.391343	0.0817988	4.78421	1.71661e-06	1.68637e-05
2610524H06Rik	522.647	-0.213037	0.119121	-1.7884	0.0737113	0.174084
2610528A11Rik	1.60605	1.15367	1.44796	0.796757	0.425592	0.611594
2610528J11Rik	3.64578	-2.40377	0.859923	-2.79534	0.00518456	0.0202634
2700029M09Rik	1045.97	-0.622223	0.0940012	-6.61931	3.60875e-11	7.99168e-10
2700038G22Rik	297.918	-0.797706	0.109138	-7.30915	2.68838e-13	7.97016e-12
2700046A07Rik	31.2597	-0.829268	0.328435	-2.52491	0.0115729	0.0397245
2700046G09Rik	235.618	0.0787351	0.142379	0.552998	0.580265	0.742934
2700049A03Rik	655.242	-0.532615	0.103959	-5.12334	3.00171e-07	3.40194e-06
2700054A10Rik	42.3791	0.247714	0.273427	0.905959	0.364958	0.554884
2700060E02Rik	4774.2	-0.132309	0.0664949	-1.98976	0.0466172	0.121748
2700062C07Rik	488.111	-0.285698	0.10167	-2.81004	0.00495349	0.0195026
2700069I18Rik	3.28606	0.0830913	0.932939	0.089064	0.929031	0.964341
2700070H01Rik	11.1669	0.0863203	0.51218	0.168535	0.866162	0.929667
2700081O15Rik	3819.89	-0.0257134	0.0731647	-0.351445	0.725255	0.844881
2700089I24Rik	5.73766	1.34542	0.741179	1.81524	0.0694869	0.166216
2700094K13Rik	2710.49	-0.584516	0.0834577	-7.00375	2.49209e-12	6.52152e-11
2700097O09Rik	357.947	-0.330499	0.0995592	-3.31962	0.000901405	0.00460187
2700099C18Rik	380.684	-0.476062	0.102503	-4.64436	3.41138e-06	3.14244e-05
2810001G20Rik	799.479	0.227916	0.10249	2.22379	0.0261623	0.0774368
2810002D19Rik	190.65	-0.00425884	0.143762	-0.0296242	0.976367	0.988143
2810004N23Rik	1393.28	-0.618678	0.0700704	-8.82937	1.05264e-18	5.94289e-17
2810006K23Rik	508.453	0.000506004	0.102919	0.00491653	0.996077	0.998625
2810013P06Rik	500.537	0.199395	0.0835484	2.38658	0.0170061	0.0543795
2810021J22Rik	493.162	0.107799	0.106351	1.01361	0.310769	0.497679
2810025M15Rik	674.727	-0.15735	0.0987806	-1.59293	0.111176	0.237352
2810029C07Rik	91.1102	0.499987	0.165516	3.02078	0.00252121	0.0110674
2810032G03Rik	21.0551	1.19266	0.408705	2.91815	0.00352113	0.0146516
2810047C21Rik1	59.6757	0.340768	0.24026	1.41833	0.156094	0.303864
2810049E08Rik	1.40195	0.933072	1.57802	0.591292	0.554325	0.723089
2810403A07Rik	3242.85	-0.0327895	0.0558457	-0.587144	0.557107	0.724897
2810403D21Rik	26.4632	0.162529	0.34669	0.468801	0.639212	0.787424
2810404M03Rik	0	NA	NA	NA	NA	NA
2810405F15Rik	21.1473	0.0100025	0.367889	0.0271889	0.978309	0.989343
2810408A11Rik	214.135	0.50383	0.138384	3.64082	0.00027177	0.00161142
2810408I11Rik	124.84	-0.209117	0.174418	-1.19894	0.230551	0.404454
2810410L24Rik	362.729	0.0258436	0.090897	0.284318	0.776167	0.878801
2810417H13Rik	1920.42	-0.188552	0.0866503	-2.17601	0.0295545	0.0855262
2810428I15Rik	639.59	0.0999652	0.118185	0.845835	0.397645	0.586637
2810429I04Rik	26.1359	-0.948565	0.351534	-2.69836	0.00696823	0.025944
2810433D01Rik	11.7225	-0.260444	0.509781	-0.510894	0.609425	0.763849
2810442N19Rik	3.43026	0.508312	0.963244	0.527709	0.597701	0.755421
2810454H06Rik	113.478	0.923755	0.162712	5.67723	1.36891e-08	1.99523e-07
2810459M11Rik	26.9871	0.904585	0.325958	2.77516	0.00551742	0.0213416
2810468N07Rik	218.976	0.454354	0.133984	3.3911	0.000696137	0.00366966
2810471M01Rik	0.182586	0.96758	3.79788	0.254768	0.798902	NA
2810474O19Rik	2516	-0.255182	0.102696	-2.48484	0.0129611	0.0435176
2900005J15Rik	373.87	0.229813	0.125338	1.83355	0.0667208	0.161095
2900008C10Rik	30.0732	0.405508	0.345873	1.17242	0.24103	0.41632
2900009J06Rik	28.0398	0.125278	0.29378	0.426434	0.669792	0.809217
2900011O08Rik	563.069	0.22992	0.0926578	2.48139	0.013087	0.0438517
2900026A02Rik	364.493	-0.44449	0.134385	-3.30758	0.000941064	0.00477237
2900041M22Rik	25.8537	-1.92756	0.362676	-5.31482	1.06763e-07	1.32043e-06
2900052N01Rik	5.82662	-0.0562959	0.658976	-0.0854295	0.93192	0.966011
2900055J20Rik	0	NA	NA	NA	NA	NA
2900057B20Rik	1.67497	0.997312	1.2992	0.767636	0.442704	0.626921
2900060B14Rik	3.29816	-0.88344	0.835553	-1.05731	0.290369	0.474405
2900076A07Rik	192.963	-0.114078	0.125729	-0.907336	0.364229	0.55456
2900079G21Rik	0.198639	0.399399	3.79869	0.105141	0.916264	NA
2900092C05Rik	0	NA	NA	NA	NA	NA
2900092D14Rik	0.284035	-2.13496	3.35675	-0.636022	0.524762	NA
2900097C17Rik	5320.83	-0.0913915	0.0464051	-1.96943	0.0489043	0.126546
3000002C10Rik	264.784	0.374595	0.112414	3.33229	0.000861344	0.00441336
3010001F23Rik	44.3721	-0.00889225	0.238593	-0.0372695	0.97027	0.985134
3010026O09Rik	311.918	0.0243655	0.120634	0.201979	0.839933	0.913766
3100003L05Rik	2.32357	0.22508	1.00025	0.225025	0.82196	0.90283
3110001I22Rik	162.507	-0.290854	0.144276	-2.01595	0.043805	0.116086
3110002H16Rik	762.22	-0.617585	0.111213	-5.55318	2.80514e-08	3.84645e-07
3110009E18Rik	53.3899	-0.654962	0.217692	-3.00866	0.00262399	0.0114417
3110009F21Rik	0.0945505	-0.17767	3.79869	-0.0467714	0.962695	NA
3110015C05Rik	0.293676	-0.562366	3.35937	-0.167402	0.867054	NA
3110021A11Rik	29.602	0.922326	0.325319	2.83514	0.00458054	0.0182662
3110021N24Rik	63.0056	1.02705	0.484463	2.11997	0.0340087	0.0953097
3110035E14Rik	9.09835	-0.230723	0.54696	-0.421828	0.673151	0.811472
3110039I08Rik	7871.77	0.171127	0.0747336	2.28983	0.0220313	0.0673676
3110039M20Rik	0	NA	NA	NA	NA	NA
3110040N11Rik	279.013	0.0342972	0.10236	0.335064	0.737577	0.853495
3110043O21Rik	1399.32	0.400608	0.0759983	5.27128	1.35477e-07	1.63899e-06
3110045C21Rik	42.2112	0.21482	0.252876	0.849508	0.395599	0.584656
3110052M02Rik	355.593	0.127506	0.102749	1.24095	0.214624	0.384364
3110056K07Rik	330.532	-0.0830969	0.122089	-0.680624	0.49611	0.674659
3110057O12Rik	224.584	2.32315	0.266831	8.70647	3.13479e-18	1.67177e-16
3110062M04Rik	175.778	0.273417	0.135159	2.02293	0.0430806	0.114539
3110070M22Rik	20.3894	0.0850865	0.574031	0.148226	0.882164	0.938989
3110079O15Rik	0	NA	NA	NA	NA	NA
3110082I17Rik	437.05	-0.38746	0.115389	-3.35787	0.000785459	0.00407467
3110082J24Rik	0.637956	0.985598	2.44558	0.403012	0.68694	NA
3110099E03Rik	6.10262	0.076451	0.634456	0.120498	0.904088	0.950436
3200001D21Rik	10.0646	-0.385297	0.522005	-0.738109	0.460448	0.642432
3300002I08Rik	32.0925	0.206082	0.357737	0.576073	0.564566	0.730217
3300002P13Rik	3.10205	1.98328	1.11839	1.77334	0.076173	0.178613
3300005D01Rik	2.08032	0.698838	1.28298	0.544698	0.585961	0.74701
3425401B19Rik	7.04237	-0.900176	0.797756	-1.12838	0.259158	0.437761
3632451O06Rik	230.708	0.502902	0.144045	3.49129	0.000480695	0.00266289
3632454L22Rik	6.22452	1.32401	0.687302	1.92639	0.054056	0.13663
3830403N18Rik	189.129	1.88394	0.223056	8.44604	3.01352e-17	1.4207e-15
3830406C13Rik	730.693	0.315878	0.101864	3.10099	0.00192877	0.00876547
3830408C21Rik	91.1431	0.78042	0.225764	3.45679	0.000546651	0.00298132
3830417A13Rik	3.96105	-1.44639	0.861815	-1.6783	0.0932876	0.20843
3830432H09Rik	11.7719	0.366495	0.478487	0.765946	0.443709	0.627893
3930402G23Rik	4.16126	-0.468686	0.75579	-0.620127	0.535174	0.707852
4430402I18Rik	16.367	0.581833	0.45128	1.28929	0.197296	0.36042
4631405J19Rik	1.67952	-0.178572	1.23365	-0.144751	0.884907	0.940282
4632404H12Rik	193.312	0.536384	0.15269	3.5129	0.000443251	0.00248101
4632415L05Rik	314.124	0.0965228	0.13361	0.722421	0.470035	0.650911
4632427E13Rik	26.212	0.514668	0.385196	1.33612	0.18151	0.338901
4632428C04Rik	15.0012	0.54874	0.435612	1.2597	0.207778	0.375118
4632428N05Rik	255.178	-0.538606	0.105529	-5.10385	3.32809e-07	3.72394e-06
4732416N19Rik	3.92343	1.037	0.785617	1.31998	0.186841	0.345955
4732456N10Rik	2.06742	-0.180791	1.15601	-0.156393	0.875724	0.935018
4732471J01Rik	61.2221	1.2777	0.254454	5.02136	5.13081e-07	5.54685e-06
4732490B19Rik	5.90473	-0.0258297	0.671265	-0.0384791	0.969306	0.984642
4732491K20Rik	43.5761	-0.215701	0.27014	-0.798478	0.424593	0.610879
4831407H17Rik	0.883291	0.917696	1.98805	0.461607	0.644364	NA
4831440E17Rik	234.2	0.402025	0.175197	2.2947	0.0217503	0.0666428
4833411C07Rik	1.3495	-1.23172	1.32356	-0.930609	0.352056	0.542299
4833412C05Rik	3.10779	-1.26413	0.914281	-1.38265	0.166772	0.318799
4833415N18Rik	6.73702	-0.251234	0.659339	-0.381039	0.703174	0.831196
4833417C18Rik	24.8386	-0.461825	0.310148	-1.48905	0.136475	0.275814
4833418N02Rik	45.927	0.404692	0.275251	1.47027	0.141489	0.282947
4833419F23Rik	14.4283	1.90736	0.552863	3.44996	0.000560664	0.00304865
4833420G17Rik	1635.3	0.00814004	0.0642204	0.126751	0.899137	0.948109
4833422C13Rik	25.4188	0.0310234	0.34271	0.0905238	0.927871	0.963751
4833422M21Rik	1.75773	-0.0589606	1.0658	-0.0553204	0.955883	0.978345
4833423E24Rik	0	NA	NA	NA	NA	NA
4833427F10Rik	0.716097	-1.49165	1.93278	-0.771762	0.440255	NA
4833427G06Rik	7.21826	0.85035	0.617253	1.37764	0.168316	0.320913
4833428L15Rik	5.70751	-2.35803	0.681878	-3.45814	0.000543928	0.00296735
4833439L19Rik	1918.99	-0.349783	0.0773343	-4.52301	6.09678e-06	5.30805e-05
4921501E09Rik	0.168747	-0.562358	3.79869	-0.14804	0.882311	NA
4921504A21Rik	40.0364	0.00412905	0.272638	0.0151448	0.987917	0.99455
4921504E06Rik	0.438839	0.581014	2.66433	0.218071	0.827374	NA
4921506M07Rik	0.38584	-0.96016	2.66449	-0.360354	0.718582	NA
4921507L20Rik	39.1792	0.680454	0.261096	2.60615	0.00915668	0.0325864
4921507P07Rik	61.6965	0.921003	0.231896	3.97162	7.13861e-05	0.000490532
4921508D12Rik	0.0945505	-0.17767	3.79869	-0.0467714	0.962695	NA
4921509C19Rik	0.747843	-0.904992	1.90337	-0.475469	0.634452	NA
4921509O07Rik	0.265676	0.967842	3.46886	0.279008	0.780238	NA
4921511C10Rik	1.38066	0.917055	1.59521	0.57488	0.565373	0.730842
4921511C20Rik	0.0839723	-1.13943	3.79869	-0.299952	0.764214	NA
4921511H03Rik	0	NA	NA	NA	NA	NA
4921511I17Rik	0.350422	0.399401	3.18475	0.12541	0.900199	NA
4921511M17Rik	0	NA	NA	NA	NA	NA
4921513I03Rik	2.48817	-0.224611	0.97391	-0.230628	0.817604	0.900669
4921515E04Rik	0	NA	NA	NA	NA	NA
4921517D22Rik	89.3221	-0.249022	0.214052	-1.16337	0.24468	0.420607
4921518K17Rik	0.814611	2.21385	2.06689	1.0711	0.284122	NA
4921524J17Rik	676.595	-0.515381	0.0854203	-6.03347	1.60473e-09	2.72046e-08
4921524L21Rik	0	NA	NA	NA	NA	NA
4921525O09Rik	17.9669	0.819805	0.400356	2.04769	0.0405904	0.109349
4921529L05Rik	8.56884	-0.124884	0.516916	-0.241594	0.809095	0.895942
4921530L21Rik	0	NA	NA	NA	NA	NA
4921531C22Rik	124.239	0.493788	0.150939	3.27145	0.00106999	0.00531241
4921531P14Rik	8.57425	0.24408	0.515049	0.473898	0.635573	0.784712
4921533I20Rik	4.59691	0.242374	0.747593	0.324206	0.745782	0.859275
4921534H16Rik	0.749651	-0.0904527	1.97137	-0.0458831	0.963403	NA
4921536K21Rik	9.03512	-0.115225	0.547225	-0.210563	0.833228	0.910044
4921539E11Rik	4.22027	2.18735	0.969723	2.25564	0.0240931	0.0725126
4922502D21Rik	0	NA	NA	NA	NA	NA
4922502H24Rik	0.111355	-1.13943	3.79869	-0.299952	0.764214	NA
4922502N22Rik	0.224059	-1.13944	3.79869	-0.299955	0.764212	NA
4930401C15Rik	0	NA	NA	NA	NA	NA
4930401O10Rik	0.282064	0.0269147	3.40047	0.00791501	0.993685	NA
4930401O12Rik	0	NA	NA	NA	NA	NA
4930402F06Rik	0.0877705	0.399408	3.79869	0.105143	0.916262	NA
4930402F11Rik	0.0847751	0.399408	3.79869	0.105143	0.916262	NA
4930402H24Rik	631.736	0.22254	0.18224	1.22113	0.222036	0.393783
4930402K13Rik	0.11439	0.399408	3.79869	0.105143	0.916262	NA
4930404A05Rik	0	NA	NA	NA	NA	NA
4930404H11Rik	0.587514	1.03993	2.05222	0.506735	0.612341	NA
4930404I05Rik	86.1541	0.377394	0.200165	1.88541	0.0593742	0.147424
4930404N11Rik	70.32	-0.249991	0.181219	-1.3795	0.167742	0.320118
4930405A10Rik	0	NA	NA	NA	NA	NA
4930405A21Rik	31.7397	0.21029	0.332977	0.631544	0.527685	0.702403
4930405D11Rik	0.0681962	0.399408	3.79869	0.105143	0.916262	NA
4930405J17Rik	0	NA	NA	NA	NA	NA
4930405L22Rik	0.222327	1.37544	3.78709	0.363192	0.716461	NA
4930405O22Rik	0.506936	0.911394	2.27821	0.400047	0.689122	NA
4930406D18Rik	0	NA	NA	NA	NA	NA
4930407G08Rik	0	NA	NA	NA	NA	NA
4930407I10Rik	1.83533	0.663389	1.11298	0.596048	0.551143	0.720977
4930407I19Rik	0.111355	-1.13943	3.79869	-0.299952	0.764214	NA
4930412B13Rik	0	NA	NA	NA	NA	NA
4930412C18Rik	44.8567	0.22029	0.270845	0.813343	0.416021	0.603287
4930412O13Rik	104.404	0.660812	0.214721	3.07754	0.00208719	0.00940365
4930413E15Rik	0.508009	0.985535	2.0944	0.470557	0.637957	NA
4930413F20Rik	4.15995	-0.452738	0.747314	-0.605821	0.544634	0.715025
4930413G21Rik	554.647	0.107383	0.0998236	1.07573	0.282049	0.465133
4930413M19Rik	0	NA	NA	NA	NA	NA
4930414N06Rik	4.84164	1.70597	0.974858	1.74997	0.0801236	0.185498
4930415F15Rik	2.38055	-0.171046	1.34346	-0.127318	0.898689	0.947933
4930415L06Rik	0	NA	NA	NA	NA	NA
4930415O20Rik	7.49644	0.206344	0.573309	0.359917	0.718909	0.84178
4930417O13Rik	0.694588	1.7876	1.91787	0.932077	0.351297	NA
4930417O22Rik	0.0877705	0.399408	3.79869	0.105143	0.916262	NA
4930419G24Rik	0.111355	-1.13943	3.79869	-0.299952	0.764214	NA
4930423M02Rik	0.338883	-0.824505	2.75213	-0.299588	0.764491	NA
4930425K10Rik	0.112704	-0.17767	3.79869	-0.0467714	0.962695	NA
4930425L21Rik	0	NA	NA	NA	NA	NA
4930425O10Rik	12.8701	0.670981	0.427276	1.57037	0.116329	0.245489
4930426D05Rik	104.503	0.053944	0.267456	0.201693	0.840157	0.913954
4930426L09Rik	12.5603	-0.0345922	0.452523	-0.0764429	0.939067	0.968845
4930427A07Rik	546.451	-0.855159	0.120398	-7.10277	1.22277e-12	3.32841e-11
4930428D20Rik	0	NA	NA	NA	NA	NA
4930428E07Rik	0	NA	NA	NA	NA	NA
4930428G15Rik	6.48569	-1.02461	0.603537	-1.69768	0.0895681	0.202045
4930428O21Rik	2.51802	-0.0530604	1.09691	-0.0483725	0.961419	0.981137
4930429B21Rik	12.3109	0.2277	0.454109	0.501421	0.616075	0.768953
4930429D17Rik	0.888671	1.22187	1.82555	0.669318	0.503293	NA
4930429F11Rik	0	NA	NA	NA	NA	NA
4930429F24Rik	19.3432	0.536561	0.362339	1.48083	0.138653	0.278977
4930430A15Rik	0	NA	NA	NA	NA	NA
4930430F08Rik	207.6	-0.0990936	0.123352	-0.803339	0.421779	0.608548
4930430F21Rik	0	NA	NA	NA	NA	NA
4930430J02Rik	2.92574	-0.515687	0.894897	-0.576253	0.564444	0.730217
4930431F12Rik	0	NA	NA	NA	NA	NA
4930431P03Rik	0.862025	-2.41435	1.68977	-1.42881	0.153059	NA
4930432J09Rik	0.827236	-3.0778	2.21793	-1.38769	0.165231	NA
4930432K21Rik	413.636	1.13338	0.167865	6.75173	1.46091e-11	3.39125e-10
4930432M17Rik	0	NA	NA	NA	NA	NA
4930433B08Rik	0	NA	NA	NA	NA	NA
4930433I11Rik	0	NA	NA	NA	NA	NA
4930433N12Rik	4.83933	1.88633	0.900423	2.09493	0.036177	0.0999621
4930434J06Rik	0	NA	NA	NA	NA	NA
4930435E12Rik	0.340625	-2.50631	3.12501	-0.802019	0.422542	NA
4930438E09Rik	0	NA	NA	NA	NA	NA
4930440C22Rik	0	NA	NA	NA	NA	NA
4930440I19Rik	0.175541	0.989362	3.79756	0.260525	0.794459	NA
4930441H08Rik	0	NA	NA	NA	NA	NA
4930441J16Rik	0.0839723	-1.13943	3.79869	-0.299952	0.764214	NA
4930442J19Rik	0.10194	-1.13943	3.79869	-0.299952	0.764214	NA
4930442L01Rik	0.222709	-2.19388	3.73898	-0.586759	0.557366	NA
4930443O20Rik	1.81406	0.773136	1.2874	0.600541	0.548145	0.718243
4930444F02Rik	0.324266	0.419852	3.27098	0.128356	0.897867	NA
4930444G20Rik	5.92204	1.27736	0.698103	1.82976	0.0672857	0.162202
4930444M15Rik	2.73971	0.128218	0.899309	0.142574	0.886626	0.941166
4930444P10Rik	6.02605	1.72898	0.711537	2.42992	0.0151022	0.0493451
4930445N18Rik	2.53539	0.402265	1.00855	0.398854	0.690001	0.822944
4930447A16Rik	0.10194	-1.13943	3.79869	-0.299952	0.764214	NA
4930447C04Rik	1488.51	1.75108	0.255532	6.85267	7.24828e-12	1.76077e-10
4930447F24Rik	4.51066	0.42258	0.802489	0.526587	0.598481	0.755984
4930447J18Rik	0	NA	NA	NA	NA	NA
4930447K03Rik	16.0336	-0.679089	0.375821	-1.80695	0.0707706	0.168559
4930447M23Rik	7.42098	-0.457516	0.587531	-0.77871	0.436151	0.620958
4930447N08Rik	0.275451	0.399397	3.46038	0.11542	0.908112	NA
4930448C13Rik	0	NA	NA	NA	NA	NA
4930448F12Rik	0	NA	NA	NA	NA	NA
4930448H16Rik	1.00368	0.915098	1.80699	0.506421	0.612561	NA
4930448I06Rik	0	NA	NA	NA	NA	NA
4930448I18Rik	0	NA	NA	NA	NA	NA
4930448K20Rik	0	NA	NA	NA	NA	NA
4930449E01Rik	0.677098	0.652163	2.26961	0.287346	0.773848	NA
4930449E18Rik	0	NA	NA	NA	NA	NA
4930449I24Rik	0	NA	NA	NA	NA	NA
4930451G09Rik	88.0505	0.777069	0.203803	3.81285	0.000137373	0.000878612
4930451I11Rik	0.922444	-0.873239	1.81159	-0.482029	0.629785	NA
4930452A19Rik	0	NA	NA	NA	NA	NA
4930452B06Rik	319.697	-0.18935	0.119315	-1.58698	0.112517	0.2396
4930452G13Rik	0.817107	0.591206	1.61891	0.365187	0.714972	NA
4930452N14Rik	0.10194	-1.13943	3.79869	-0.299952	0.764214	NA
4930453H23Rik	0.0859343	0.399408	3.79869	0.105143	0.916262	NA
4930453L07Rik	0.821592	-0.974199	1.61277	-0.604052	0.545809	NA
4930453N24Rik	710.578	-0.396022	0.0668533	-5.92374	3.14699e-09	5.05397e-08
4930455B14Rik	0.501579	0.64407	2.32018	0.277595	0.781323	NA
4930455C13Rik	3.81699	-0.294849	0.84589	-0.348567	0.727414	0.84666
4930455D15Rik	0.55168	0.563561	2.57909	0.218511	0.827031	NA
4930455F16Rik	0.367109	-0.683354	3.14512	-0.217274	0.827995	NA
4930455G09Rik	15.8716	0.549416	0.424283	1.29493	0.195345	0.357893
4930455H04Rik	0.710892	2.5296	2.4384	1.0374	0.299549	NA
4930455J16Rik	0	NA	NA	NA	NA	NA
4930456L15Rik	0.752612	1.51727	1.99278	0.76138	0.44643	NA
4930459C07Rik	0.493943	-2.99493	2.35377	-1.2724	0.203232	NA
4930459L07Rik	0	NA	NA	NA	NA	NA
4930461G14Rik	126.409	-1.75517	0.217636	-8.0647	7.34152e-16	2.95795e-14
4930463O16Rik	0.72194	-0.411972	1.99217	-0.206795	0.83617	NA
4930465K10Rik	3.09108	1.1338	1.06473	1.06487	0.286934	0.470811
4930465M20Rik	0	NA	NA	NA	NA	NA
4930467D21Rik	10.5587	1.10106	0.488077	2.25592	0.0240754	0.0724966
4930467E23Rik	1.24758	1.7807	1.66574	1.06902	0.285062	NA
4930467K11Rik	0.741194	1.34496	1.99172	0.675273	0.499502	NA
4930469G21Rik	2.06899	-1.67216	1.06114	-1.57582	0.115067	0.243583
4930470H14Rik	0.209678	0.399394	3.79869	0.10514	0.916265	NA
4930470O06Rik	0	NA	NA	NA	NA	NA
4930470P17Rik	0.291106	-0.00573221	3.42353	-0.00167436	0.998664	NA
4930471C04Rik	0.199165	0.989362	3.79756	0.260525	0.794459	NA
4930471G03Rik	0	NA	NA	NA	NA	NA
4930471M09Rik	3.08796	0.513082	0.934613	0.548977	0.583021	0.74492
4930473A02Rik	17.3841	0.204469	0.373082	0.548054	0.583655	0.745441
4930473O22Rik	0	NA	NA	NA	NA	NA
4930474G06Rik	0.216329	-0.562358	3.79869	-0.14804	0.882311	NA
4930474H20Rik	0.0847751	0.399408	3.79869	0.105143	0.916262	NA
4930474M22Rik	1.26353	-0.487481	1.4704	-0.331529	0.740245	0.855482
4930474N05Rik	0	NA	NA	NA	NA	NA
4930474N09Rik	1.83934	1.1025	1.24077	0.888561	0.374239	0.564863
4930477N07Rik	0.155967	0.96758	3.79788	0.254768	0.798902	NA
4930478L05Rik	0.314714	1.76331	3.76738	0.468048	0.639751	NA
4930478P22Rik	0.0877705	0.399408	3.79869	0.105143	0.916262	NA
4930479D17Rik	2.47078	1.10688	1.18333	0.935399	0.349583	0.539912
4930480E11Rik	0	NA	NA	NA	NA	NA
4930480G23Rik	0.170136	-0.562358	3.79869	-0.14804	0.882311	NA
4930480K15Rik	0	NA	NA	NA	NA	NA
4930480K23Rik	101.212	0.884195	0.226072	3.91113	9.18666e-05	0.000613688
4930480M12Rik	0.402582	-2.02302	2.66395	-0.759407	0.447609	NA
4930481A15Rik	85.4211	0.559215	0.194805	2.87064	0.00409637	0.0166684
4930482G09Rik	0.66457	-1.2991	2.4525	-0.529704	0.596317	NA
4930483J18Rik	2.85919	0.174952	0.950247	0.184112	0.853925	0.921758
4930483K19Rik	7.15411	-0.480857	0.808086	-0.595056	0.551806	0.721283
4930483O08Rik	1.17836	2.08359	1.71977	1.21155	0.225684	NA
4930484H19Rik	0.238906	1.45316	3.55425	0.408851	0.682649	NA
4930486F22Rik	0	NA	NA	NA	NA	NA
4930486I03Rik	0	NA	NA	NA	NA	NA
4930486L24Rik	7.63078	-0.831412	0.641814	-1.29541	0.195179	0.357665
4930487D11Rik	0.0681962	0.399408	3.79869	0.105143	0.916262	NA
4930487H11Rik	0.345068	0.968043	3.26789	0.296229	0.767055	NA
4930488B22Rik	0	NA	NA	NA	NA	NA
4930488L21Rik	0.112704	-0.17767	3.79869	-0.0467714	0.962695	NA
4930500F04Rik	0.0681962	0.399408	3.79869	0.105143	0.916262	NA
4930500L23Rik	0	NA	NA	NA	NA	NA
4930502A04Rik	0.112704	-0.17767	3.79869	-0.0467714	0.962695	NA
4930502E09Rik	3.33586	-0.172891	0.956309	-0.18079	0.856532	0.923241
4930502E18Rik	84.1034	0.0820836	0.18362	0.447029	0.654854	0.799045
4930503B20Rik	4.83279	1.04583	0.820018	1.27538	0.202176	0.367213
4930503E14Rik	8.80221	-1.49671	0.527358	-2.83812	0.00453804	0.0181204
4930503E24Rik	37.7536	0.115375	0.442581	0.260687	0.794334	0.888193
4930503F20Rik	0.817142	1.14274	1.97378	0.578958	0.562617	NA
4930503H13Rik	0	NA	NA	NA	NA	NA
4930503L19Rik	403.504	0.0646335	0.160994	0.401465	0.688078	0.821829
4930503O07Rik	0.172546	0.989362	3.79756	0.260525	0.794459	NA
4930504C09Rik	0	NA	NA	NA	NA	NA
4930504O13Rik	4.0618	-0.538776	0.766487	-0.702917	0.482108	0.661867
4930505A04Rik	3.64283	-0.733782	0.76892	-0.954303	0.33993	0.529462
4930505G20Rik	0	NA	NA	NA	NA	NA
4930505K13Rik	0	NA	NA	NA	NA	NA
4930505K14Rik	0	NA	NA	NA	NA	NA
4930506A18Rik	0.20216	0.989362	3.79756	0.260525	0.794459	NA
4930506C21Rik	36.5132	0.0808518	0.276742	0.292156	0.770167	0.874862
4930507D05Rik	16.7217	-0.0930057	0.402741	-0.230932	0.817368	0.900626
4930507D10Rik	0	NA	NA	NA	NA	NA
4930509E16Rik	13.2146	2.26524	0.606869	3.73267	0.000189461	0.00116963
4930509J09Rik	0.0945505	-0.17767	3.79869	-0.0467714	0.962695	NA
4930509K18Rik	0.0877705	0.399408	3.79869	0.105143	0.916262	NA
4930511A02Rik	0.671293	2.21188	1.98187	1.11606	0.264398	NA
4930511A08Rik	1.02613	0.115196	1.44274	0.0798455	0.93636	NA
4930511E03Rik	1.5713	-1.21401	1.5087	-0.804674	0.421008	0.607973
4930511M06Rik	46.1841	-0.0324565	0.260472	-0.124606	0.900835	0.949034
4930512B01Rik	1.83877	-0.916126	1.25505	-0.729953	0.465419	0.646623
4930512J16Rik	0.533254	-2.12117	2.51622	-0.842998	0.39923	NA
4930512M02Rik	0.162747	0.399399	3.79869	0.105141	0.916264	NA
4930513D17Rik	0.336451	1.47062	2.78589	0.527883	0.597581	NA
4930513N10Rik	150.94	-0.191086	0.17608	-1.08523	0.277822	0.460194
4930513O06Rik	0	NA	NA	NA	NA	NA
4930515B02Rik	0	NA	NA	NA	NA	NA
4930515G01Rik	24.8101	0.553638	0.325916	1.69871	0.0893733	0.201779
4930515G16Rik	0	NA	NA	NA	NA	NA
4930515L03Rik	0.0681962	0.399408	3.79869	0.105143	0.916262	NA
4930515L19Rik	0	NA	NA	NA	NA	NA
4930517E11Rik	0.0681962	0.399408	3.79869	0.105143	0.916262	NA
4930517M08Rik	0	NA	NA	NA	NA	NA
4930518J21Rik	0.0877705	0.399408	3.79869	0.105143	0.916262	NA
4930518P08Rik	0.415119	-0.562372	3.13334	-0.17948	0.857561	NA
4930519D14Rik	0	NA	NA	NA	NA	NA
4930519F09Rik	41.4014	-0.338622	0.252034	-1.34355	0.179093	0.335308
4930519F16Rik	0.0847751	0.399408	3.79869	0.105143	0.916262	NA
4930519F24Rik	0	NA	NA	NA	NA	NA
4930519G04Rik	0.324714	0.504157	2.81189	0.179294	0.857707	NA
4930519H02Rik	0	NA	NA	NA	NA	NA
4930519K11Rik	1.60891	0.637697	1.30823	0.487449	0.62594	0.776936
4930520O04Rik	49.9669	-0.0632528	0.247973	-0.255079	0.798662	0.890746
4930520P13Rik	0	NA	NA	NA	NA	NA
4930521E06Rik	0.274101	-0.562366	3.43207	-0.163856	0.869844	NA
4930522H14Rik	0	NA	NA	NA	NA	NA
4930522O17Rik	0	NA	NA	NA	NA	NA
4930523C07Rik	348.696	0.438071	0.10838	4.042	5.29974e-05	0.000377063
4930523O13Rik	0	NA	NA	NA	NA	NA
4930524B15Rik	271.604	4.33926	0.287299	15.1036	1.53296e-51	1.75255e-48
4930524B17Rik	0	NA	NA	NA	NA	NA
4930524C18Rik	0	NA	NA	NA	NA	NA
4930524N10Rik	0	NA	NA	NA	NA	NA
4930524O05Rik	0.363654	-0.562368	2.74886	-0.204583	0.837898	NA
4930524O08Rik	0.175541	0.989362	3.79756	0.260525	0.794459	NA
4930525C09Rik	0	NA	NA	NA	NA	NA
4930525D18Rik	2.05357	1.26523	1.48598	0.851444	0.394523	0.583538
4930525G20Rik	31.6059	0.176541	0.302936	0.582768	0.560049	0.727277
4930526H09Rik	0.0859343	0.399408	3.79869	0.105143	0.916262	NA
4930526I15Rik	329.008	0.374447	0.108982	3.43586	0.000590668	0.00319094
4930526L06Rik	9.74858	-0.55711	0.511007	-1.09022	0.275616	0.457244
4930527F14Rik	0.199125	-0.562358	3.79869	-0.14804	0.882311	NA
4930527G23Rik	0	NA	NA	NA	NA	NA
4930528A17Rik	24.5747	0.829632	0.394485	2.10308	0.0354592	0.0984397
4930528D03Rik	0.378676	-1.03919	3.12644	-0.332389	0.739596	NA
4930528G23Rik	0	NA	NA	NA	NA	NA
4930528H21Rik	0.277996	-0.177676	3.39825	-0.0522846	0.958302	NA
4930528P14Rik	0	NA	NA	NA	NA	NA
4930529C04Rik	259.019	-0.0515441	0.222453	-0.231707	0.816765	0.900293
4930529K09Rik	0	NA	NA	NA	NA	NA
4930529L06Rik	0	NA	NA	NA	NA	NA
4930532I03Rik	0.152168	-0.562358	3.79869	-0.14804	0.882311	NA
4930532M18Rik	0	NA	NA	NA	NA	NA
4930533B01Rik	0	NA	NA	NA	NA	NA
4930533N22Rik	0	NA	NA	NA	NA	NA
4930533P14Rik	0	NA	NA	NA	NA	NA
4930538K18Rik	4.86443	-0.383533	0.705684	-0.543491	0.586792	0.747673
4930539C22Rik	0	NA	NA	NA	NA	NA
4930539E08Rik	44.4198	0.251579	0.278863	0.90216	0.366972	0.557112
4930539J05Rik	175.942	0.0823697	0.171154	0.481261	0.630331	0.78069
4930539M17Rik	2.09661	-2.44187	1.17824	-2.07247	0.0382215	0.104397
4930539N22Rik	0	NA	NA	NA	NA	NA
4930540M03Rik	0	NA	NA	NA	NA	NA
4930542C21Rik	0.47977	1.47913	2.59458	0.570084	0.568621	NA
4930542D17Rik	1.04728	-0.898869	1.7496	-0.513757	0.607422	NA
4930543E12Rik	2.14179	-0.0156293	1.50861	-0.0103601	0.991734	0.996522
4930543N07Rik	0	NA	NA	NA	NA	NA
4930544D05Rik	0.643242	1.48596	2.1644	0.686548	0.492368	NA
4930544G11Rik	0	NA	NA	NA	NA	NA
4930544M13Rik	0	NA	NA	NA	NA	NA
4930545E07Rik	0	NA	NA	NA	NA	NA
4930545H06Rik	0.070741	-0.17767	3.79869	-0.0467714	0.962695	NA
4930545L23Rik	0.213294	-2.13826	3.7439	-0.571133	0.56791	NA
4930546C10Rik	0.0859343	0.399408	3.79869	0.105143	0.916262	NA
4930546K05Rik	1.15412	0.603728	1.68441	0.358421	0.720028	NA
4930547E08Rik	5.12417	1.07786	0.730175	1.47617	0.139898	0.280901
4930547E14Rik	0.11439	0.399408	3.79869	0.105143	0.916262	NA
4930548G14Rik	0	NA	NA	NA	NA	NA
4930548H24Rik	34.5825	-2.24432	0.357203	-6.28303	3.32034e-10	6.34646e-09
4930548J01Rik	0.313555	1.75835	3.76765	0.466698	0.640716	NA
4930548K13Rik	0	NA	NA	NA	NA	NA
4930549C01Rik	0.11439	0.399408	3.79869	0.105143	0.916262	NA
4930549C15Rik	0.434349	0.399402	3.05586	0.1307	0.896013	NA
4930549G23Rik	7.52078	-0.0320586	0.673887	-0.0475726	0.962057	0.981238
4930550C14Rik	40.9789	0.574058	0.269783	2.12785	0.0333493	0.0939801
4930550C17Rik	0.111355	-1.13943	3.79869	-0.299952	0.764214	NA
4930550L24Rik	236.149	-0.0304443	0.176934	-0.172066	0.863385	0.927966
4930552N02Rik	0	NA	NA	NA	NA	NA
4930552P12Rik	1.62658	-0.668805	1.36	-0.491769	0.622882	0.774664
4930553C11Rik	0	NA	NA	NA	NA	NA
4930553E22Rik	0	NA	NA	NA	NA	NA
4930554C24Rik	0	NA	NA	NA	NA	NA
4930554G24Rik	0.0859343	0.399408	3.79869	0.105143	0.916262	NA
4930554H23Rik	0	NA	NA	NA	NA	NA
4930554I06Rik	0.0877705	0.399408	3.79869	0.105143	0.916262	NA
4930555B11Rik	0.0877705	0.399408	3.79869	0.105143	0.916262	NA
4930555B12Rik	0	NA	NA	NA	NA	NA
4930555G01Rik	4.8982	0.805852	0.749124	1.07573	0.28205	0.465133
4930555G21Rik	0	NA	NA	NA	NA	NA
4930555K05Rik	0	NA	NA	NA	NA	NA
4930556C24Rik	0.10194	-1.13943	3.79869	-0.299952	0.764214	NA
4930556G01Rik	2.0576	0.852601	1.30477	0.653449	0.513467	0.689498
4930556J02Rik	0.0877705	0.399408	3.79869	0.105143	0.916262	NA
4930556M19Rik	178.405	0.0978846	0.129513	0.75579	0.449775	0.633356
4930556N09Rik	0	NA	NA	NA	NA	NA
4930556N13Rik	1.15799	-2.19645	1.65666	-1.32583	0.184897	NA
4930557A04Rik	0	NA	NA	NA	NA	NA
4930557F10Rik	0.530808	1.0024	2.27425	0.440762	0.659385	NA
4930557J02Rik	0.522581	2.2484	2.52243	0.891362	0.372735	NA
4930557K07Rik	12.0493	0.796698	0.52363	1.52149	0.128137	0.263533
4930558C23Rik	1.92581	-3.67335	1.33426	-2.75309	0.0059035	0.0225631
4930558F17Rik	0.175541	0.989362	3.79756	0.260525	0.794459	NA
4930558G05Rik	0	NA	NA	NA	NA	NA
4930558J18Rik	63.0208	-0.445332	0.217405	-2.04839	0.0405214	0.109192
4930558K02Rik	4.59982	3.00986	1.03783	2.90016	0.00372969	0.0153726
4930559C10Rik	0	NA	NA	NA	NA	NA
4930562C15Rik	5.54223	-0.332538	0.771556	-0.430997	0.666471	0.807196
4930562F07Rik	9.43993	0.307301	0.508523	0.604302	0.545643	0.715887
4930563D23Rik	0.381376	0.96811	3.20939	0.301649	0.762919	NA
4930563E18Rik	163.629	0.0940103	0.150395	0.625091	0.531912	0.705974
4930563E22Rik	172.267	0.230159	0.140856	1.63401	0.102257	0.223154
4930563F08Rik	0.62822	1.81147	2.47843	0.730895	0.464843	NA
4930563H07Rik	0	NA	NA	NA	NA	NA
4930563M20Rik	0.307845	-2.13407	3.27212	-0.652198	0.514274	NA
4930563M21Rik	3.65912	1.3373	0.93185	1.43511	0.151257	0.296929
4930564B18Rik	0	NA	NA	NA	NA	NA
4930564C03Rik	0.158512	0.399399	3.79869	0.105141	0.916264	NA
4930564D02Rik	0	NA	NA	NA	NA	NA
4930565D16Rik	0	NA	NA	NA	NA	NA
4930565N06Rik	8.06411	4.78364	2.32974	2.0533	0.0400439	0.108163
4930567H12Rik	0.812001	1.26663	1.84812	0.685363	0.493115	NA
4930567H17Rik	0	NA	NA	NA	NA	NA
4930567J20Rik	0	NA	NA	NA	NA	NA
4930567K12Rik	0.0847751	0.399408	3.79869	0.105143	0.916262	NA
4930567K20Rik	0	NA	NA	NA	NA	NA
4930568D16Rik	0	NA	NA	NA	NA	NA
4930568E12Rik	0.856367	2.81185	2.08026	1.35168	0.176476	NA
4930568G15Rik	0.152971	0.96758	3.79788	0.254768	0.798902	NA
4930570G19Rik	6.69296	-0.437745	0.616838	-0.70966	0.477915	0.657938
4930571K23Rik	0.070741	-0.17767	3.79869	-0.0467714	0.962695	NA
4930571O06Rik	0	NA	NA	NA	NA	NA
4930572K03Rik	0	NA	NA	NA	NA	NA
4930572O03Rik	24.5132	-0.0559768	0.333956	-0.167617	0.866884	0.930032
4930572O13Rik	0	NA	NA	NA	NA	NA
4930573O16Rik	0	NA	NA	NA	NA	NA
4930577N17Rik	63.5226	0.0459548	0.194486	0.236289	0.813208	0.898464
4930578C19Rik	9.95783	0.465002	0.582299	0.798563	0.424544	0.610879
4930578E11Rik	0.350621	0.00697132	2.78563	0.0025026	0.998003	NA
4930578I06Rik	0.533944	0.783656	2.55325	0.306924	0.758901	NA
4930578M01Rik	1.68883	0.125856	1.24191	0.101341	0.91928	0.958528
4930578N18Rik	0	NA	NA	NA	NA	NA
4930579F01Rik	0.189101	-0.177679	3.79869	-0.0467737	0.962694	NA
4930579G18Rik	68.3335	0.904934	0.393178	2.30159	0.0213584	0.0656777
4930579G24Rik	313.054	0.234436	0.113918	2.05794	0.0395957	0.107314
4930579H20Rik	0.182096	-1.13944	3.79869	-0.299955	0.764212	NA
4930579J19Rik	0	NA	NA	NA	NA	NA
4930579K19Rik	46.686	-0.0448743	0.291588	-0.153896	0.877691	0.936027
4930579P08Rik	0	NA	NA	NA	NA	NA
4930581F22Rik	177.379	0.277632	0.145051	1.91404	0.0556154	0.13978
4930583K01Rik	2.4395	1.29016	1.21359	1.06309	0.28774	0.471601
4930583P06Rik	0.10194	-1.13943	3.79869	-0.299952	0.764214	NA
4930584F24Rik	0	NA	NA	NA	NA	NA
4930586N03Rik	0.33038	1.54194	3.28254	0.469741	0.63854	NA
4930587E11Rik	0.0839723	-1.13943	3.79869	-0.299952	0.764214	NA
4930590J08Rik	2.94286	0.772127	0.979934	0.787938	0.430733	0.616797
4930590L20Rik	0	NA	NA	NA	NA	NA
4930591A17Rik	2.02477	-2.95784	1.24764	-2.37075	0.0177522	0.0563756
4930591E09Rik	0	NA	NA	NA	NA	NA
4930592A05Rik	11.5127	-0.667257	0.660381	-1.01041	0.312298	0.499306
4930592I03Rik	0.872853	-0.0815253	1.6177	-0.0503958	0.959807	NA
4930593A02Rik	0.182321	0.399399	3.79869	0.105141	0.916264	NA
4930593C16Rik	0.11439	0.399408	3.79869	0.105143	0.916262	NA
4930594C11Rik	81.3109	-0.669674	0.171884	-3.89608	9.7764e-05	0.00064911
4930594O21Rik	0.200324	0.989362	3.79756	0.260525	0.794459	NA
4930595D18Rik	1.64383	2.29368	1.66745	1.37556	0.168959	0.321635
4930595M18Rik	0.368233	-1.39464	2.69136	-0.51819	0.604326	NA
4930596D02Rik	0	NA	NA	NA	NA	NA
4930596I21Rik	1.17598	-1.23662	1.93544	-0.638936	0.522865	NA
4930597A21Rik	0.11439	0.399408	3.79869	0.105143	0.916262	NA
4930597G03Rik	0	NA	NA	NA	NA	NA
4930598F16Rik	0	NA	NA	NA	NA	NA
4930599N23Rik	21.992	1.81307	0.482948	3.75417	0.000173913	0.0010855
4931402G19Rik	7.02076	0.614339	0.67086	0.915748	0.359799	0.550288
4931403E22Rik	8.47907	0.212122	0.558951	0.3795	0.704317	0.832259
4931403G20Rik	2.01641	-0.0231552	1.13121	-0.0204694	0.983669	0.992294
4931406B18Rik	0.182321	0.399399	3.79869	0.105141	0.916264	NA
4931406C07Rik	1154.95	0.447616	0.0722391	6.19631	5.78039e-10	1.05314e-08
4931406H21Rik	25.5595	0.86474	0.42214	2.04847	0.0405141	0.109192
4931406P16Rik	1993.42	0.393068	0.0937635	4.19213	2.76353e-05	0.000210803
4931408C20Rik	0.267096	0.988793	3.45939	0.285829	0.775009	NA
4931408D14Rik	3.18266	-0.103202	0.873247	-0.118182	0.905923	0.951604
4931409K22Rik	3.78753	0.862913	0.976463	0.883713	0.376851	0.566748
4931414P19Rik	236.613	-0.0689216	0.10356	-0.665524	0.505716	0.68305
4931417E11Rik	0	NA	NA	NA	NA	NA
4931419H13Rik	0.321645	0.3994	3.30115	0.120988	0.9037	NA
4931420L22Rik	0.111355	-1.13943	3.79869	-0.299952	0.764214	NA
4931423N10Rik	1.30722	0.61795	1.56027	0.396054	0.692065	0.824492
4931428F04Rik	189.698	0.349979	0.135898	2.57531	0.0100151	0.0350815
4931428L18Rik	0.906394	-0.940278	1.51514	-0.620589	0.53487	NA
4931429I11Rik	1.09449	-0.334168	1.35703	-0.24625	0.805488	NA
4931429L15Rik	3.20289	0.0767876	0.911806	0.0842148	0.932886	0.966318
4931429P17Rik	0.354641	0.0252341	2.7776	0.00908484	0.992751	NA
4931430N09Rik	0.0945505	-0.17767	3.79869	-0.0467714	0.962695	NA
4931431B13Rik	0	NA	NA	NA	NA	NA
4931431C16Rik	3.13161	1.34974	1.11335	1.21233	0.225387	0.39849
4931431F19Rik	0.10194	-1.13943	3.79869	-0.299952	0.764214	NA
4931440F15Rik	66.8202	0.226837	0.217498	1.04294	0.296978	0.482187
4931440J10Rik	6.10629	0.779372	0.719244	1.0836	0.278542	0.460886
4931440P22Rik	39.324	0.465507	0.264256	1.76158	0.0781407	0.182036
4932411E22Rik	2.82864	0.952382	1.0129	0.940249	0.34709	0.537183
4932411N23Rik	0.0877705	0.399408	3.79869	0.105143	0.916262	NA
4932412D23Rik	0.169907	-0.562358	3.79869	-0.14804	0.882311	NA
4932413F04Rik	0.535229	0.941072	2.26065	0.416284	0.677202	NA
4932414J04Rik	0.111355	-1.13943	3.79869	-0.299952	0.764214	NA
4932414N04Rik	0.250517	0.967787	3.52916	0.274226	0.783911	NA
4932415M13Rik	0	NA	NA	NA	NA	NA
4932416H05Rik	151.45	0.0440618	0.128351	0.343291	0.73138	0.849045
4932416K20Rik	0.0839723	-1.13943	3.79869	-0.299952	0.764214	NA
4932418E24Rik	63.9905	1.32868	0.77189	1.72133	0.0851909	0.194692
4932429P05Rik	0	NA	NA	NA	NA	NA
4932435O22Rik	71.2309	0.777314	0.240461	3.23259	0.00122672	0.00596311
4932438A13Rik	3341.01	1.16413	0.181737	6.40554	1.49834e-10	3.03855e-09
4932438H23Rik	5.41095	-0.0588308	0.698281	-0.0842508	0.932857	0.966318
4932441J04Rik	2.21958	-0.443949	1.04886	-0.423269	0.672099	0.810685
4932443I19Rik	5.29927	0.456999	0.722682	0.632366	0.527148	0.702063
4932702P03Rik	2.17479	-0.828429	1.12636	-0.735491	0.46204	0.644025
4933400A11Rik	0	NA	NA	NA	NA	NA
4933400B14Rik	0.111355	-1.13943	3.79869	-0.299952	0.764214	NA
4933400C23Rik	0.737784	-1.41071	1.97129	-0.715625	0.474223	NA
4933400F21Rik	1.24488	-0.927529	1.36189	-0.681061	0.495833	NA
4933400L20Rik	0.0839723	-1.13943	3.79869	-0.299952	0.764214	NA
4933401B06Rik	0.0681962	0.399408	3.79869	0.105143	0.916262	NA
4933401D09Rik	9.98127	-0.898519	0.533421	-1.68445	0.0920955	0.206498
4933401H06Rik	0	NA	NA	NA	NA	NA
4933402C06Rik	0	NA	NA	NA	NA	NA
4933402D24Rik	7.50996	1.4444	0.733487	1.96922	0.0489277	0.126572
4933402E13Rik	15.7835	-2.85682	0.448532	-6.36927	1.89932e-10	3.80114e-09
4933402J07Rik	0.567314	0.969679	2.2378	0.433317	0.664784	NA
4933402J10Rik	0	NA	NA	NA	NA	NA
4933402J15Rik	0.10194	-1.13943	3.79869	-0.299952	0.764214	NA
4933402N03Rik	0	NA	NA	NA	NA	NA
4933402N22Rik	0	NA	NA	NA	NA	NA
4933402P03Rik	1.79257	0.368552	1.30742	0.281893	0.778026	0.879608
4933403O08Rik	12.4232	3.85267	0.896508	4.29742	1.728e-05	0.00013725
4933404G15Rik	0.0859343	0.399408	3.79869	0.105143	0.916262	NA
4933404K08Rik	0.277136	0.967892	3.41681	0.283273	0.776967	NA
4933404K13Rik	2.85882	-2.26926	0.987868	-2.29713	0.0216114	0.0662724
4933404O12Rik	182.437	1.00194	0.147346	6.79992	1.04677e-11	2.48346e-10
4933405D12Rik	5.767	-0.112184	0.632679	-0.177316	0.85926	0.925031
4933405E24Rik	0.0877705	0.399408	3.79869	0.105143	0.916262	NA
4933405L10Rik	7.84236	2.81529	0.824445	3.41477	0.000638359	0.00340433
4933405O20Rik	0.237746	1.44696	3.78336	0.382453	0.702125	NA
4933406C10Rik	42.1674	0.831587	0.291168	2.85604	0.00428964	0.01731
4933406D12Rik	0	NA	NA	NA	NA	NA
4933406F09Rik	0	NA	NA	NA	NA	NA
4933406G16Rik	0.288095	1.64354	3.38738	0.485194	0.627539	NA
4933406I18Rik	2.28749	3.33316	1.54116	2.16276	0.0305593	0.0877536
4933406J08Rik	129.701	2.02343	0.228705	8.84734	8.96296e-19	5.07587e-17
4933406J10Rik	0.500931	-0.562371	2.59988	-0.216307	0.828749	NA
4933406K04Rik	0.0877705	0.399408	3.79869	0.105143	0.916262	NA
4933406M09Rik	1.2537	-3.33528	1.67456	-1.99173	0.0464003	NA
4933407E24Rik	0.111355	-1.13943	3.79869	-0.299952	0.764214	NA
4933407G14Rik	0	NA	NA	NA	NA	NA
4933407I05Rik	0.0945505	-0.17767	3.79869	-0.0467714	0.962695	NA
4933407K13Rik	721.573	0.370045	0.168611	2.19466	0.028188	0.0822222
4933407L21Rik	10.7126	0.291268	0.493372	0.590362	0.554948	0.72335
4933408B17Rik	56.5574	0.236225	0.250206	0.944123	0.345107	0.535246
4933408J17Rik	15.8434	0.075063	0.382284	0.196354	0.844333	0.916296
4933408N05Rik	0.54242	2.57276	2.44746	1.05119	0.293169	NA
4933409G03Rik	0	NA	NA	NA	NA	NA
4933409K07Rik	270.629	0.227771	0.199733	1.14038	0.254129	0.431499
4933411E08Rik	11.7825	0.194851	0.526682	0.369959	0.711413	0.83686
4933411G06Rik	0	NA	NA	NA	NA	NA
4933411K16Rik	3.14505	2.36101	1.3889	1.69992	0.0891465	0.201367
4933412E12Rik	14.4326	0.172985	0.403822	0.428369	0.668382	0.808427
4933412E24Rik	0.456545	0.514061	2.34222	0.219476	0.826279	NA
4933412O06Rik	0	NA	NA	NA	NA	NA
4933413G19Rik	5.48788	0.542759	0.689367	0.78733	0.431089	0.616968
4933413J09Rik	428.479	-0.0371518	0.138124	-0.268974	0.78795	0.88457
4933413L06Rik	0	NA	NA	NA	NA	NA
4933415F23Rik	63.7988	-0.65538	0.203057	-3.22756	0.00124851	0.00605647
4933416C03Rik	119.606	2.21845	0.249183	8.90289	5.44109e-19	3.21059e-17
4933416E03Rik	0	NA	NA	NA	NA	NA
4933416I08Rik	0.154713	-1.13944	3.79869	-0.299955	0.764212	NA
4933416M06Rik	0.635347	-2.9921	2.13099	-1.40409	0.160292	NA
4933416M07Rik	16.7972	-1.84873	0.398063	-4.64433	3.41181e-06	3.14244e-05
4933417A18Rik	0.683349	0.349848	2.08033	0.16817	0.86645	NA
4933417D19Rik	22.7866	0.594117	0.355888	1.66939	0.0950392	0.211388
4933417E11Rik	2.39422	0.558393	0.945333	0.590684	0.554732	0.723247
4933417G07Rik	7.29038	-1.56204	0.595126	-2.62473	0.00867182	0.0311579
4933417O13Rik	4.40549	-0.624425	0.80388	-0.776764	0.437298	0.621914
4933421I07Rik	0.302264	0.0267866	3.33842	0.00802373	0.993598	NA
4933421O10Rik	226.463	0.289797	0.120429	2.40637	0.0161119	0.0519603
4933422A05Rik	4.91902	0.272088	0.693082	0.392578	0.694631	0.825566
4933424G05Rik	1.23881	-0.929418	1.60062	-0.58066	0.561469	NA
4933424G06Rik	2.73165	1.38402	1.01127	1.36859	0.171126	0.324613
4933425B07Rik	0.420208	-2.09016	3.55702	-0.587615	0.556791	NA
4933425L06Rik	11.9887	0.372235	0.551267	0.675236	0.499526	0.677441
4933427D06Rik	265.997	4.75454	0.274577	17.3159	3.5702e-67	2.17687e-63
4933427D14Rik	816.425	0.212163	0.0861161	2.46369	0.0137516	0.0456192
4933427E11Rik	7.94921	0.309881	0.593896	0.521776	0.601826	0.758795
4933427E13Rik	0	NA	NA	NA	NA	NA
4933427G17Rik	52.1449	3.27706	0.418442	7.83158	4.81789e-15	1.78038e-13
4933427I22Rik	0.452412	1.55735	3.64446	0.42732	0.669146	NA
4933428C19Rik	0.313179	0.399389	3.79869	0.105138	0.916266	NA
4933428G20Rik	14.8365	0.544775	0.484797	1.12372	0.261132	0.440202
4933429K18Rik	0.11439	0.399408	3.79869	0.105143	0.916262	NA
4933429O19Rik	0	NA	NA	NA	NA	NA
4933430H16Rik	0.399114	0.988159	3.16848	0.311872	0.755138	NA
4933430I17Rik	27.5833	0.293239	0.338982	0.865058	0.387007	0.57641
4933430M04Rik	0.0847751	0.399408	3.79869	0.105143	0.916262	NA
4933430N04Rik	0	NA	NA	NA	NA	NA
4933431E20Rik	422.442	0.321628	0.0964691	3.334	0.000856075	0.0043876
4933431G14Rik	5.06902	0.619176	1.13336	0.54632	0.584846	0.746409
4933432G23Rik	0.070741	-0.17767	3.79869	-0.0467714	0.962695	NA
4933432I03Rik	0.556684	-1.52877	2.15652	-0.708903	0.478385	NA
4933432I09Rik	2.42863	0.409034	1.0277	0.398009	0.690624	0.823365
4933432K03Rik	0.520358	0.441494	2.59462	0.170157	0.864887	NA
4933433C11Rik	2.91141	1.79327	1.10624	1.62105	0.105007	0.227528
4933433F19Rik	0	NA	NA	NA	NA	NA
4933433G08Rik	0	NA	NA	NA	NA	NA
4933433G15Rik	24.9312	1.01048	0.438162	2.30617	0.0211013	0.0649806
4933433G19Rik	7.8973	-0.374113	0.697375	-0.536459	0.591641	0.751131
4933433H22Rik	0.261475	1.55008	3.77828	0.410261	0.681614	NA
4933434E20Rik	1613.81	-0.314265	0.0585785	-5.36485	8.10178e-08	1.02772e-06
4933436E23Rik	0.216329	-0.562358	3.79869	-0.14804	0.882311	NA
4933436H12Rik	0.180485	0.399399	3.79869	0.105141	0.916264	NA
4933436I01Rik	0.0681962	0.399408	3.79869	0.105143	0.916262	NA
4933438B17Rik	3.14318	-0.106057	0.862679	-0.122939	0.902156	0.949714
4933438K21Rik	6.90291	0.820519	0.680647	1.2055	0.228011	0.401731
4933439C10Rik	427.796	0.207042	0.0891193	2.3232	0.0201684	0.0626033
4933439K11Rik	20.401	0.420328	0.395022	1.06406	0.2873	0.471116
4933440J02Rik	0.0839723	-1.13943	3.79869	-0.299952	0.764214	NA
4933440M02Rik	0.333456	1.45915	2.7905	0.522899	0.601044	NA
5031410I06Rik	64.753	0.0603851	0.251283	0.240307	0.810092	0.896606
5031414D18Rik	6.44453	-0.196221	0.593087	-0.330847	0.74076	0.855969
5031425E22Rik	378.923	0.165067	0.109262	1.51074	0.130854	0.267408
5031425F14Rik	1.84992	1.08318	1.35882	0.797143	0.425368	0.61152
5031426D15Rik	11.706	-0.445119	0.592348	-0.751448	0.452383	0.635632
5031434C07Rik	3.81456	-0.751319	0.876686	-0.856999	0.391446	0.580629
5031434O11Rik	20.3853	0.0954752	0.353127	0.27037	0.786875	0.88409
5031439G07Rik	953.876	0.170973	0.0843835	2.02614	0.0427508	0.113811
5033403F01Rik	13.5346	0.115269	0.511423	0.225388	0.821678	0.90272
5033403H07Rik	0.179326	0.399399	3.79869	0.105141	0.916264	NA
5033404E19Rik	0.452648	-0.313365	2.58074	-0.121424	0.903355	NA
5033406O09Rik	41.1841	-0.290629	0.282029	-1.03049	0.30278	0.488835
5033428I22Rik	16.3932	-0.465917	0.401368	-1.16082	0.245715	0.421866
5330411J11Rik	2.55887	-0.728445	1.08316	-0.672517	0.501255	0.679031
5330413P13Rik	0.597562	-1.41354	1.95663	-0.722433	0.470028	NA
5330417C22Rik	2.71647	0.187714	1.07046	0.175359	0.860798	0.92611
5330426P16Rik	34.7436	-0.382427	0.282638	-1.35306	0.176035	0.331177
5330434G04Rik	0	NA	NA	NA	NA	NA
5330439B14Rik	0.275451	0.399397	3.46038	0.11542	0.908112	NA
5430401F13Rik	0.0681962	0.399408	3.79869	0.105143	0.916262	NA
5430402E10Rik	0.0847751	0.399408	3.79869	0.105143	0.916262	NA
5430402O13Rik	18.1331	0.75914	0.374613	2.02646	0.0427176	0.113739
5430403N17Rik	1.14534	-1.513	1.60207	-0.944406	0.344962	NA
5430405H02Rik	57.9407	0.0683852	0.214807	0.318356	0.750215	0.861756
5430416N02Rik	192.614	-0.408167	0.122878	-3.32174	0.000894592	0.00457092
5430416O09Rik	3.00326	0.91017	1.05761	0.860595	0.389461	0.578577
5430419D17Rik	0.070741	-0.17767	3.79869	-0.0467714	0.962695	NA
5430421F17Rik	1.39615	-0.349542	1.22702	-0.284871	0.775743	0.878685
5430421N21Rik	0.432194	-0.808198	2.63206	-0.307059	0.758798	NA
5430425K12Rik	0.182586	0.96758	3.79788	0.254768	0.798902	NA
5430427M07Rik	0.279299	-2.54562	3.71179	-0.68582	0.492826	NA
5430427O19Rik	4.9984	-0.725079	0.65203	-1.11203	0.266124	0.446367
5430428K19Rik	0.11439	0.399408	3.79869	0.105143	0.916262	NA
5430431A17Rik	6.72116	2.31054	1.08737	2.12488	0.0335965	0.0945166
5430434I15Rik	0	NA	NA	NA	NA	NA
5430437J10Rik	0.336764	-1.13945	3.79869	-0.299957	0.76421	NA
5430440P10Rik	0.994937	1.23181	1.79814	0.685043	0.493317	NA
5530400C23Rik	0	NA	NA	NA	NA	NA
5530401A14Rik	0	NA	NA	NA	NA	NA
5530601H04Rik	272.485	0.324987	0.20704	1.56968	0.116489	0.245772
5730403I07Rik	1.31084	1.38671	1.5274	0.907891	0.363936	0.554159
5730405O15Rik	38.0305	0.26638	0.256841	1.03714	0.299672	0.485355
5730408K05Rik	92.6349	-0.447338	0.206041	-2.17111	0.0299231	0.0863197
5730409E04Rik	351.308	-0.112247	0.0975159	-1.15106	0.249708	0.426326
5730412P04Rik	0.11439	0.399408	3.79869	0.105143	0.916262	NA
5730416F02Rik	6.31327	-0.782504	0.583165	-1.34182	0.179654	0.336221
5730420D15Rik	7.11816	-1.12	0.681493	-1.64345	0.10029	0.220157
5730422E09Rik	6.32747	-0.243343	0.617283	-0.394216	0.693422	0.825204
5730435O14Rik	1.22537	-0.017031	1.33446	-0.0127624	0.989817	NA
5730455P16Rik	765.329	0.200403	0.0815058	2.45876	0.0139417	0.0461495
5730457N03Rik	44.2801	1.7863	0.37933	4.70908	2.48832e-06	2.36572e-05
5730460C07Rik	2.83481	0.0852727	1.01648	0.0838901	0.933144	0.966318
5730480H06Rik	102.309	-0.0817221	0.158281	-0.516309	0.605638	0.761457
5730488B01Rik	0	NA	NA	NA	NA	NA
5730507C01Rik	168.986	-0.0191946	0.129469	-0.148256	0.882141	0.938989
5730508B09Rik	257.711	0.406073	0.143784	2.82419	0.00474002	0.0187875
5730522E02Rik	9.57266	1.38402	0.552414	2.50541	0.0122309	0.0415233
5730559C18Rik	98.8247	-0.184999	0.186894	-0.989857	0.322244	0.510125
5830411N06Rik	17.4946	-0.0239268	0.36936	-0.064779	0.94835	0.974125
5830415F09Rik	334.451	-0.411716	0.112387	-3.66339	0.000248902	0.00148739
5830416I19Rik	0.758887	-3.01301	1.85421	-1.62496	0.104172	NA
5830416P10Rik	21.1384	-0.576628	0.385839	-1.49448	0.135051	0.273692
5830417I10Rik	3301.81	0.33682	0.154287	2.18307	0.0290308	0.0842772
5830418P13Rik	17.2306	-0.259928	0.412468	-0.630176	0.528579	0.703065
5830428M24Rik	0.986396	0.976605	1.62801	0.599878	0.548587	NA
5830432E09Rik	5.84748	-1.98868	0.635908	-3.12731	0.00176417	0.00811726
5830444B04Rik	10.0266	0.0199202	0.641517	0.0310517	0.975228	0.987745
5830454E08Rik	40.5313	0.153143	0.299607	0.511148	0.609248	0.763783
5830473C10Rik	1.46613	-0.838859	1.2952	-0.647666	0.517201	0.692981
5930403L14Rik	6.77017	-0.489618	0.621693	-0.787555	0.430957	0.616876
5930412G12Rik	59.0395	-0.33432	0.247132	-1.3528	0.17612	0.331304
5930430L01Rik	53.4094	0.242243	0.257031	0.942466	0.345954	0.536151
5930438M14Rik	0.510739	0.582708	2.33145	0.249934	0.802638	NA
6030407O03Rik	17.4143	-0.00716796	0.420115	-0.0170619	0.986387	0.993776
6030408B16Rik	366.7	-0.100076	0.125734	-0.795933	0.426071	0.612134
6030419C18Rik	591.609	-0.28264	0.0984788	-2.87006	0.00410391	0.0166856
6030440G07Rik	10.1697	-0.314483	0.497004	-0.632759	0.526891	0.702061
6030443J06Rik	46.1282	-0.089064	0.288152	-0.309086	0.757256	0.866166
6030458C11Rik	1430.86	-0.193201	0.0885228	-2.1825	0.0290727	0.0843588
6030466F02Rik	30.1719	-0.00471949	0.285436	-0.0165343	0.986808	0.9939
6030468B19Rik	61.9526	-0.121827	0.479156	-0.254254	0.799299	0.890968
6030469F06Rik	23.7785	-0.0301063	0.362222	-0.0831157	0.93376	0.966629
6030471H07Rik	3.55226	-0.52903	0.811678	-0.651773	0.514548	0.690594
6030498E09Rik	28.7433	-0.414899	0.347359	-1.19444	0.232305	0.406595
6230400D17Rik	59.1961	-0.0552912	0.208791	-0.264817	0.791151	0.886442
6330403A02Rik	931.016	0.355828	0.140114	2.53956	0.0110992	0.0383307
6330403K07Rik	936.723	0.0337801	0.130838	0.258182	0.796266	0.889586
6330407A03Rik	0.0945505	-0.17767	3.79869	-0.0467714	0.962695	NA
6330408A02Rik	550.235	1.52627	0.188916	8.07913	6.52303e-16	2.64566e-14
6330409D20Rik	4.29885	0.0364761	0.743918	0.0490324	0.960893	0.980967
6330410L21Rik	1.37078	1.6455	1.69281	0.97205	0.331026	0.519481
6330415B21Rik	0.337034	-0.562369	2.80445	-0.200527	0.841068	NA
6330415G19Rik	53.4385	0.0086775	0.235608	0.0368303	0.97062	0.985253
6330416G13Rik	212.538	-0.0493739	0.114063	-0.432867	0.665111	0.806618
6330418K02Rik	45.8217	0.127761	0.240592	0.531027	0.5954	0.75411
6330549D23Rik	295.919	-0.0562286	0.107983	-0.520716	0.602564	0.759203
6430411K18Rik	0	NA	NA	NA	NA	NA
6430503K07Rik	0.644725	-1.8091	2.03563	-0.888716	0.374156	NA
6430531B16Rik	40.2881	0.433011	0.265075	1.63354	0.102355	0.223297
6430548M08Rik	312.458	1.06212	0.157788	6.73131	1.68146e-11	3.86884e-10
6430550D23Rik	50.9985	0.767297	0.24246	3.16463	0.00155282	0.00729622
6430562O15Rik	18.0513	-0.190914	0.405631	-0.470659	0.637884	0.786468
6430571L13Rik	37.61	-0.303681	0.252527	-1.20257	0.229144	0.402784
6430573F11Rik	96.4503	-0.276501	0.193494	-1.42899	0.153007	0.299306
6430584L05Rik	8.21454	0.0929126	0.540291	0.171968	0.863463	0.927994
6430706D22Rik	0	NA	NA	NA	NA	NA
6430710C18Rik	95.1658	-0.279923	0.180169	-1.55367	0.120264	0.251673
6530402F18Rik	53.6555	0.295936	0.300806	0.98381	0.325209	0.513307
6530403H02Rik	0.19649	-1.13944	3.79869	-0.299955	0.764212	NA
6530411M01Rik	5.16039	-0.869389	0.849342	-1.0236	0.306023	0.492458
6720468P15Rik	122.128	-0.286741	0.15641	-1.83327	0.0667627	0.161175
6720483E21Rik	21.7565	0.785401	0.366197	2.14475	0.0319728	0.0909984
6720489N17Rik	415.486	-0.138203	0.0973496	-1.41966	0.155707	0.303451
6820408C15Rik	39.0215	0.556007	0.258266	2.15284	0.031331	0.0895898
6820431F20Rik	6611.59	0.0693685	0.0942675	0.735869	0.461811	0.643817
7420426K07Rik	3.48973	-0.313321	1.0457	-0.299629	0.76446	0.871192
7420461P10Rik	1.77572	0.195274	1.2036	0.162241	0.871116	0.932275
7420700N18Rik	0.152168	-0.562358	3.79869	-0.14804	0.882311	NA
7420701I03Rik	0	NA	NA	NA	NA	NA
7530416G11Rik	0.296976	1.68401	3.77183	0.446471	0.655257	NA
7630403G23Rik	0	NA	NA	NA	NA	NA
8030411F24Rik	8.21751	0.355403	0.568899	0.624721	0.532154	0.706193
8030423F21Rik	14.1283	-0.149761	0.414362	-0.361427	0.717781	0.840997
8030423J24Rik	2.84711	0.168958	1.04067	0.162355	0.871026	0.932234
8030442B05Rik	0	NA	NA	NA	NA	NA
8030443G20Rik	0.28149	-1.55798	3.36638	-0.462807	0.643503	NA
8030451O07Rik	0.175541	0.989362	3.79756	0.260525	0.794459	NA
8030455M16Rik	6.07497	0.448099	0.76281	0.587433	0.556913	0.724796
8030462N17Rik	378.952	0.677828	0.189653	3.57403	0.000351523	0.00201696
8430408G22Rik	95.3772	-0.311738	0.215462	-1.44684	0.147943	0.2924
8430419L09Rik	954.305	0.299499	0.0933909	3.20694	0.00134155	0.00644253
8430422H06Rik	0	NA	NA	NA	NA	NA
8430423G03Rik	0.621837	0.522022	1.9629	0.265944	0.790282	NA
8430426J06Rik	1.8654	-0.536891	1.01714	-0.527844	0.597607	0.755421
8430429K09Rik	201.889	0.182357	0.130025	1.40248	0.160772	0.310084
8430430B14Rik	0.187874	-0.562358	3.79869	-0.14804	0.882311	NA
8430431K14Rik	0	NA	NA	NA	NA	NA
8430436N08Rik	1.17162	0.729595	1.54348	0.472695	0.636431	NA
8430437L04Rik	8.45629	0.135045	0.61843	0.218367	0.827143	0.90625
9030025P20Rik	678.156	0.0277095	0.108883	0.254488	0.799118	0.89091
9030204H09Rik	0	NA	NA	NA	NA	NA
9030404E10Rik	0.43901	-0.703145	2.62535	-0.267829	0.788831	NA
9030612E09Rik	44.9237	0.263106	0.258453	1.018	0.308677	0.495334
9030617O03Rik	105.478	-0.00691972	0.160568	-0.0430952	0.965626	0.983007
9030619P08Rik	0.240742	1.46103	3.547	0.411907	0.680408	NA
9030624G23Rik	124.393	0.433678	0.170431	2.5446	0.0109403	0.0378587
9030624J02Rik	1391.36	0.214421	0.0658304	3.25717	0.00112531	0.00553188
9030625G05Rik	15.566	-0.116447	0.459588	-0.253373	0.79998	0.891255
9130008F23Rik	30.9998	-0.977089	0.331807	-2.94475	0.00323213	0.013673
9130011E15Rik	419.226	0.0145171	0.0883144	0.16438	0.869432	0.931509
9130015A21Rik	2.20746	3.01186	1.4578	2.06603	0.0388261	0.105678
9130015L21Rik	0.0945505	-0.17767	3.79869	-0.0467714	0.962695	NA
9130019O22Rik	384.838	0.00400684	0.0966216	0.0414694	0.966922	0.983762
9130019P16Rik	10.4595	0.328555	0.536892	0.611958	0.540565	0.711829
9130023H24Rik	267.599	0.493536	0.108353	4.55489	5.24125e-06	4.61371e-05
9130024F11Rik	16.5182	1.02175	0.502406	2.03371	0.0419809	0.112303
9130204L05Rik	0	NA	NA	NA	NA	NA
9130209A04Rik	0	NA	NA	NA	NA	NA
9130221F21Rik	0.332882	-0.00546575	3.28809	-0.00166229	0.998674	NA
9130221H12Rik	316.839	-0.176827	0.127913	-1.3824	0.166849	0.31888
9130227L01Rik	0.348222	0.0265756	3.24573	0.00818788	0.993467	NA
9130230L23Rik	4.22199	-2.40013	0.82147	-2.92175	0.00348067	0.0145196
9130401M01Rik	1235.63	-1.04781	0.0887019	-11.8127	3.35728e-32	8.41253e-30
9130409I23Rik	4.80836	-0.485984	0.82214	-0.591121	0.554439	0.723139
9130409J20Rik	0.199125	-0.562358	3.79869	-0.14804	0.882311	NA
9230009I02Rik	0.0681962	0.399408	3.79869	0.105143	0.916262	NA
9230102K24Rik	7.02488	1.21635	0.706692	1.72119	0.0852159	0.194722
9230102O04Rik	4.89479	1.61719	0.849772	1.90308	0.0570296	0.14259
9230104L09Rik	0.981124	0.36249	1.65142	0.219502	0.826259	NA
9230105E05Rik	2.04387	0.19624	1.05978	0.185171	0.853095	0.921287
9230110C19Rik	316.566	0.30848	0.117761	2.61954	0.00880487	0.0315471
9230110F15Rik	0	NA	NA	NA	NA	NA
9230112D13Rik	0.639579	1.31357	1.99825	0.657359	0.51095	NA
9230112J17Rik	2.26012	0.687824	1.18274	0.581549	0.560871	0.72793
9230114K14Rik	23.0765	0.581685	0.370654	1.56935	0.116567	0.245848
9230116L04Rik	4.03476	0.0270302	0.844734	0.0319984	0.974473	0.987319
9230116N13Rik	56.3507	0.500425	0.22385	2.23554	0.0253818	0.0755425
9230117E06Rik	0.962389	-0.240689	1.80549	-0.133309	0.893949	NA
9330020H09Rik	148.921	-0.037689	0.149161	-0.252673	0.800521	0.891513
9330102E08Rik	256.906	1.22291	0.17452	7.00726	2.43034e-12	6.36902e-11
9330111N05Rik	0.179326	0.399399	3.79869	0.105141	0.916264	NA
9330117O12Rik	0.660786	2.10211	2.47301	0.850018	0.395315	NA
9330133O14Rik	308.662	0.079333	0.106003	0.748404	0.454216	0.637304
9330136K24Rik	39.7755	0.45064	0.263523	1.71006	0.0872555	0.198221
9330151L19Rik	420.179	0.0765668	0.0987077	0.775692	0.437931	0.622285
9330158H04Rik	0.698105	0.254206	1.9583	0.12981	0.896717	NA
9330159F19Rik	29.4676	-1.45289	0.274265	-5.29739	1.17467e-07	1.44016e-06
9330159M07Rik	101.17	-0.0509763	0.175586	-0.290321	0.771571	0.875858
9330162012Rik	31.8211	0.0417082	0.281005	0.148425	0.882007	0.938932
9330162B11Rik	0	NA	NA	NA	NA	NA
9330175E14Rik	0.4111	1.75391	3.11828	0.56246	0.573802	NA
9330175M20Rik	0.856577	-0.450799	1.6053	-0.280818	0.77885	NA
9330178D15Rik	0.0839723	-1.13943	3.79869	-0.299952	0.764214	NA
9330179D12Rik	11.6661	0.362006	0.453002	0.799126	0.424217	0.610809
9330182L06Rik	50.3704	0.214032	0.244211	0.876421	0.380801	0.570533
9330182O14Rik	0	NA	NA	NA	NA	NA
9330188P03Rik	0.857297	-0.985653	1.98587	-0.496334	0.619659	NA
9330199G10Rik	0.199165	0.989362	3.79756	0.260525	0.794459	NA
9430007A20Rik	0	NA	NA	NA	NA	NA
9430014N10Rik	0	NA	NA	NA	NA	NA
9430015G10Rik	1592.17	0.348297	0.108612	3.2068	0.00134222	0.00644279
9430016H08Rik	545.801	-0.213648	0.0827544	-2.58172	0.00983107	0.034596
9430018G01Rik	4.87594	1.17568	0.788538	1.49097	0.135971	0.275076
9430019J16Rik	0	NA	NA	NA	NA	NA
9430020K01Rik	1741.44	0.0375332	0.0947049	0.396317	0.691871	0.824315
9430021M05Rik	3.01845	4.63589	1.45252	3.19162	0.00141478	0.00673936
9430037G07Rik	87.1502	-0.356145	0.247452	-1.43925	0.15008	0.295317
9430038I01Rik	289.21	-0.281645	0.114678	-2.45597	0.0140504	0.0464671
9430041J12Rik	7.39975	-0.903439	0.583191	-1.54913	0.12135	0.253442
9430060I03Rik	10.807	0.136778	0.462141	0.295966	0.767256	0.872801
9430065F17Rik	36.0072	1.33989	0.308331	4.34562	1.38882e-05	0.00011226
9430069I07Rik	0.572355	1.05645	2.24896	0.469749	0.638534	NA
9430076C15Rik	2.76151	0.90047	1.06613	0.844618	0.398324	0.587119
9430078K24Rik	69.3991	-0.283992	0.198459	-1.43099	0.152434	0.298599
9430083A17Rik	74.0155	0.157784	0.199509	0.790861	0.429025	0.614881
9430091E24Rik	180.915	0.286651	0.123871	2.31411	0.0206617	0.0638958
9530002B09Rik	0	NA	NA	NA	NA	NA
9530003J23Rik	0.112704	-0.17767	3.79869	-0.0467714	0.962695	NA
9530014B07Rik	0	NA	NA	NA	NA	NA
9530020I12Rik	1.22901	0.451617	1.50209	0.300658	0.763675	NA
9530026F06Rik	0.517784	0.561301	2.12936	0.263601	0.792087	NA
9530026P05Rik	18.8901	0.0705883	0.382663	0.184466	0.853648	0.921561
9530027J09Rik	30.3293	-0.729903	0.299589	-2.43635	0.0148365	0.0486447
9530036O11Rik	4.12782	0.229034	0.788791	0.29036	0.771541	0.875858
9530051G07Rik	34.3355	1.46822	0.369644	3.97198	7.12791e-05	0.00048998
9530052E02Rik	2.34672	-0.486113	1.03013	-0.471894	0.637002	0.785906
9530053A07Rik	5.88549	0.0850314	0.672501	0.126441	0.899383	0.948269
9530059O14Rik	0.152971	0.96758	3.79788	0.254768	0.798902	NA
9530062K07Rik	16.7354	0.592979	0.433018	1.36941	0.170872	0.324321
9530068E07Rik	3737.92	-0.0441283	0.0804463	-0.548543	0.583319	0.745117
9530077C05Rik	180.358	0.635864	0.150629	4.2214	2.42785e-05	0.000187781
9530080O11Rik	14.7856	0.768765	0.483206	1.59097	0.111617	0.238114
9530082P21Rik	688.84	-0.0835325	0.126798	-0.658783	0.510035	0.686654
9530091C08Rik	11.2597	-0.303989	0.480791	-0.632269	0.527211	0.702063
9630001P10Rik	25.9085	0.495206	0.30556	1.62065	0.105093	0.227637
9630013A20Rik	0	NA	NA	NA	NA	NA
9630013K17Rik	10.5994	1.55795	0.688583	2.26255	0.0236635	0.0714835
9630028B13Rik	1.98106	1.55678	1.31349	1.18522	0.235931	0.410583
9630028H03Rik	0.522319	2.19677	2.47852	0.886323	0.375443	NA
9630028I04Rik	84.1031	-1.06341	0.243131	-4.37381	1.22095e-05	9.9855e-05
9830107B12Rik	2.01854	0.31429	1.26681	0.248095	0.804061	0.893323
9830132P13Rik	2.52445	0.359632	1.03855	0.346283	0.72913	0.847775
9830147E19Rik	696.144	0.171585	0.131576	1.30407	0.19221	0.353535
9830166K06Rik	8.54873	-0.991313	0.562736	-1.76159	0.0781378	0.182036
9930012K11Rik	225.503	-0.0457798	0.112442	-0.407141	0.683904	0.818765
9930014A18Rik	118.707	-0.017472	0.161858	-0.107946	0.914039	0.955489
9930021J03Rik	1812.99	0.402211	0.140375	2.86526	0.00416666	0.0168695
9930104L06Rik	610.226	0.00925121	0.0898647	0.102946	0.918006	0.95771
9930111H07Rik	0.0945505	-0.17767	3.79869	-0.0467714	0.962695	NA
9930111J21Rik1	1.93527	2.7217	1.52241	1.78776	0.0738146	0.174244
9930111J21Rik2	4.59921	1.32581	1.07512	1.23317	0.217513	0.387861
A130010J15Rik	384.768	0.492366	0.135229	3.64098	0.0002716	0.00161093
A130077B15Rik	0.915991	0.971029	1.84752	0.525586	0.599176	NA
A1bg	58.2943	-0.0863337	0.203199	-0.424873	0.67093	0.810022
A1cf	2.02882	4.30105	1.54139	2.79038	0.00526463	0.0205244
A230001M10Rik	0.198639	0.399399	3.79869	0.105141	0.916264	NA
A230009B12Rik	0.883197	-2.26203	1.67452	-1.35086	0.176742	NA
A230020J21Rik	8.77409	1.00209	0.620589	1.61474	0.106368	0.229663
A230028O05Rik	7.69998	0.856221	0.59717	1.4338	0.15163	0.297406
A230046K03Rik	1455.25	0.0692487	0.135391	0.511473	0.60902	0.763721
A230050P20Rik	149.519	-0.1936	0.181172	-1.0686	0.285251	0.468719
A230056J06Rik	5.35558	0.349359	0.639503	0.546298	0.584861	0.746409
A230056P14Rik	52.5984	0.100914	0.23386	0.431514	0.666094	0.806948
A230057D06Rik	199.556	0.561164	0.122288	4.58887	4.45645e-06	4.00186e-05
A230065H16Rik	148.623	0.256012	0.155079	1.65085	0.0987699	0.217648
A230070E04Rik	1.83869	-0.131908	1.21867	-0.108239	0.913806	0.95538
A230072C01Rik	378.7	0.040569	0.111066	0.365268	0.714911	0.838839
A230072E10Rik	4.06475	1.7924	0.930371	1.92654	0.054037	0.136601
A230077H06Rik	16.7229	0.529067	0.385566	1.37218	0.170006	0.323091
A230103J11Rik	110.316	0.0273793	0.236058	0.115986	0.907664	0.952662
A230108P19Rik	7.02016	1.98193	0.705565	2.80899	0.00496972	0.0195487
A2m	29.5025	-0.0114312	0.378217	-0.030224	0.975888	0.987987
A330009N23Rik	35.6972	0.0679942	0.308651	0.220295	0.825642	0.905163
A330015K06Rik	3.76264	-1.4507	0.780082	-1.85968	0.0629308	0.154183
A330023F24Rik	218.708	0.674625	0.205373	3.28488	0.00102025	0.00510879
A330032B11Rik	0.962749	1.03256	1.71561	0.601863	0.547265	NA
A330033J07Rik	17.6844	0.303929	0.394502	0.770411	0.441056	0.625203
A330035P11Rik	66.0987	0.65443	0.204797	3.19551	0.00139585	0.00666132
A330040F15Rik	9.59156	0.362928	0.531117	0.68333	0.494399	0.673033
A330041J22Rik	19.6713	0.0491194	0.375621	0.130769	0.895958	0.946732
A330048O09Rik	7.54557	-0.540643	0.74622	-0.724508	0.468754	0.649703
A330049N07Rik	0.425851	-1.36798	2.53986	-0.538604	0.59016	NA
A330050F15Rik	1.07	1.95483	1.66306	1.17544	0.239819	NA
A330069E16Rik	40.3662	0.637577	0.252499	2.52507	0.0115677	0.0397139
A330070K13Rik	0.200324	0.989362	3.79756	0.260525	0.794459	NA
A330074K22Rik	14.4171	0.575649	0.481218	1.19623	0.231605	0.405603
A330076C08Rik	74.6957	0.197916	0.195267	1.01356	0.310791	0.497679
A330076H08Rik	74.0631	0.199157	0.188489	1.0566	0.290694	0.47485
A330093E20Rik	18.0992	0.100225	0.386284	0.259459	0.795281	0.888872
A330102I10Rik	4.02754	0.401697	0.807673	0.497351	0.618941	0.771231
A3galt2	31.2621	0.133428	0.283331	0.470926	0.637694	0.786401
A430005L14Rik	1116.07	-0.492047	0.0799887	-6.15145	7.67781e-10	1.37508e-08
A430033K04Rik	260.107	0.159366	0.180769	0.881602	0.377992	0.567661
A430035B10Rik	21.1024	0.671347	0.35419	1.89544	0.058034	0.144705
A430046D13Rik	204.995	1.04406	0.163612	6.38132	1.75563e-10	3.52126e-09
A430078G23Rik	42.6677	0.449158	0.319317	1.40662	0.159541	0.308588
A430078I02Rik	16.8378	0.725022	0.491051	1.47647	0.139818	0.280864
A430085M09Rik	0.0877705	0.399408	3.79869	0.105143	0.916262	NA
A430088P11Rik	0.719478	2.22867	1.98269	1.12406	0.260988	NA
A430089I19Rik	0	NA	NA	NA	NA	NA
A430090L17Rik	19.9177	0.00189987	0.359953	0.00527811	0.995789	0.998518
A430093F15Rik	6.4116	0.12397	0.633466	0.195701	0.844844	0.916438
A430105I19Rik	247.593	0.278368	0.15662	1.77734	0.0755123	0.177587
A4galt	100.658	-0.40836	0.162961	-2.50587	0.0122149	0.0414877
A4gnt	0.0839723	-1.13943	3.79869	-0.299952	0.764214	NA
A530006G24Rik	0	NA	NA	NA	NA	NA
A530013C23Rik	1.03059	0.791722	1.71939	0.460467	0.645181	NA
A530016L24Rik	41.3096	0.158704	0.26104	0.607969	0.543208	0.71401
A530032D15Rik	40.4362	0.119865	0.269672	0.444487	0.656691	0.800119
A530046M15Rik	0.195327	-2.02352	3.75464	-0.538938	0.589929	NA
A530050N04Rik	0.0859343	0.399408	3.79869	0.105143	0.916262	NA
A530053G22Rik	0	NA	NA	NA	NA	NA
A530058N18Rik	0.34339	0.0253151	2.80065	0.00903903	0.992788	NA
A530064D06Rik	4.99091	0.664372	0.760112	0.874045	0.382094	0.57173
A530065N20Rik	0.070741	-0.17767	3.79869	-0.0467714	0.962695	NA
A530072M11Rik	24.5683	-0.0227519	0.301593	-0.0754392	0.939865	0.969087
A530088E08Rik	2.07726	1.8587	1.31812	1.41012	0.158505	0.307274
A530099J19Rik	0.199165	0.989362	3.79756	0.260525	0.794459	NA
A630001G21Rik	62.8652	0.148625	0.253693	0.585845	0.55798	0.725826
A630010A05Rik	0	NA	NA	NA	NA	NA
A630012P03Rik	0.664097	1.03359	1.9341	0.534403	0.593063	NA
A630019I02Rik	0.155516	0.399399	3.79869	0.105141	0.916264	NA
A630020A06	6.2457	1.10526	0.747278	1.47905	0.139128	0.279786
A630023A22Rik	2.25004	0.353613	1.22138	0.289519	0.772184	0.876174
A630023P12Rik	0.783644	0.0341558	1.94506	0.0175603	0.98599	NA
A630033H20Rik	10.3366	0.0812754	0.555837	0.146222	0.883746	0.939799
A630066F11Rik	68.0648	0.378079	0.223671	1.69033	0.0909642	0.204463
A630072M18Rik	193.439	-0.139089	0.139994	-0.993536	0.320449	0.508162
A630073D07Rik	0.318488	-0.00555642	3.33217	-0.00166751	0.99867	NA
A630075F10Rik	15.6859	-0.130669	0.426559	-0.306332	0.759352	0.867804
A630076J17Rik	2.11586	0.0193742	1.25957	0.0153816	0.987728	0.994414
A630077J23Rik	0.112704	-0.17767	3.79869	-0.0467714	0.962695	NA
A630089N07Rik	60.7624	0.253352	0.396256	0.639363	0.522587	0.698082
A630095E13Rik	0	NA	NA	NA	NA	NA
A630095N17Rik	1.58259	3.59666	1.54956	2.32108	0.0202824	0.0629251
A730004F24Rik	0.701363	-2.5039	2.72665	-0.918307	0.358458	NA
A730006G06Rik	0	NA	NA	NA	NA	NA
A730008H23Rik	3.05349	1.59781	1.20101	1.33038	0.183393	0.341438
A730017C20Rik	358.521	0.0402821	0.123383	0.326479	0.744062	0.858104
A730017L22Rik	223.824	-0.000861319	0.113082	-0.0076168	0.993923	0.997568
A730018C14Rik	0.407608	1.40049	2.69522	0.519618	0.60333	NA
A730020E08Rik	14.1503	1.03366	0.428263	2.41361	0.0157956	0.0511475
A730020M07Rik	5.47051	0.257154	0.651902	0.394468	0.693236	0.825191
A730036I17Rik	6.31612	-1.60814	0.625534	-2.57082	0.0101457	0.035451
A730043L09Rik	0.979753	2.10059	1.89134	1.11063	0.266727	NA
A730046J19Rik	39.946	0.427606	0.285282	1.49889	0.133903	0.271939
A730056A06Rik	18.0383	-0.178794	0.373512	-0.478683	0.632164	0.78206
A730082K24Rik	0.895909	-1.94763	1.84728	-1.05432	0.291737	NA
A730085K08Rik	0	NA	NA	NA	NA	NA
A730090H04Rik	22.2848	1.71939	0.415845	4.13469	3.55434e-05	0.000265046
A730090N16Rik	31.4623	0.00702106	0.28631	0.0245226	0.980436	0.990355
A830009L08Rik	2.97587	-0.249553	0.958593	-0.260332	0.794608	0.888336
A830010M20Rik	452.121	0.153467	0.115535	1.32832	0.184073	0.342319
A830011K09Rik	16.3096	-0.0362709	0.418247	-0.0867213	0.930893	0.96541
A830018L16Rik	29.1075	-1.04993	0.335252	-3.13175	0.00173766	0.00801243
A830019L24Rik	0	NA	NA	NA	NA	NA
A830052D11Rik	12.8379	-0.134656	0.430402	-0.31286	0.754387	0.864452
A830080D01Rik	1546.33	-0.368109	0.176785	-2.08224	0.0373206	0.102457
A830082K12Rik	36.6339	0.10544	0.264519	0.398612	0.690179	0.823045
A830082N09Rik	137.251	0.243359	0.200009	1.21674	0.223704	0.396203
A930001A20Rik	0.963323	0.233088	1.71351	0.13603	0.891798	NA
A930001C03Rik	12.3485	-0.421348	0.418915	-1.00581	0.314508	0.501393
A930002C04Rik	3.16747	0.531208	0.973529	0.545652	0.585305	0.746598
A930003A15Rik	0.711162	0.529496	2.40029	0.220597	0.825406	NA
A930003O13Rik	1.44706	3.09052	1.53758	2.00998	0.0444329	0.11735
A930004D18Rik	178.947	-0.0552755	0.156247	-0.353769	0.723512	0.844257
A930005H10Rik	66.28	0.28881	0.203932	1.41621	0.156715	0.304798
A930006I01Rik	0	NA	NA	NA	NA	NA
A930006K02Rik	95.9322	0.326252	0.17787	1.83421	0.066623	0.160901
A930007I19Rik	25.6024	0.348092	0.369509	0.942039	0.346173	0.536353
A930009A15Rik	1.35075	0.316033	1.36113	0.232183	0.816396	0.900206
A930011G23Rik	0.563903	-1.44569	2.21461	-0.652796	0.513888	NA
A930012L18Rik	13.3224	0.619422	0.450497	1.37497	0.169139	0.321879
A930013F10Rik	136.465	0.716631	0.333243	2.15047	0.0315177	0.089941
A930015D03Rik	36.9218	0.151792	0.256799	0.591091	0.554459	0.723139
A930016O22Rik	2.04647	0.420648	1.27328	0.330364	0.741125	0.856269
A930017M01Rik	13.371	0.774702	0.460768	1.68133	0.0926994	0.207496
A930018P22Rik	5.07867	-0.585115	0.72455	-0.807557	0.419346	0.606665
A930019D19Rik	1.63851	1.24983	1.42408	0.877644	0.380137	0.569863
A930024E05Rik	151.149	-0.185397	0.134032	-1.38323	0.166595	0.318661
A930031H19Rik	0.138937	0.399399	3.79869	0.105141	0.916264	NA
A930041C12Rik	14.6353	0.166568	0.408736	0.40752	0.683626	0.818702
AA387883	1.08569	0.206722	1.53136	0.134992	0.892618	NA
AA388235	87.3142	0.0285775	0.175577	0.162763	0.870705	0.931999
AA413626	9.63	1.28153	0.61996	2.06712	0.0387227	0.105525
AA414768	763.712	0.0333842	0.0894061	0.373399	0.708851	0.835189
AA415398	128.965	0.497827	0.1549	3.21387	0.00130958	0.00630496
AA465934	46.9643	-0.114463	0.231644	-0.49413	0.621214	0.773308
AA467197	13.403	-1.01975	0.413485	-2.46622	0.0136547	0.0453471
AA474331	87.821	0.670427	0.349851	1.91632	0.0553242	0.139143
AA536875	0.239488	-0.562366	3.58044	-0.157066	0.875193	NA
AA543186	46.2327	0.466711	0.256906	1.81666	0.0692686	0.165824
AA543401	0	NA	NA	NA	NA	NA
AA545190	0	NA	NA	NA	NA	NA
AA619741	4.20285	-1.11125	0.769582	-1.44397	0.148748	0.293421
AA792892	0.112704	-0.17767	3.79869	-0.0467714	0.962695	NA
AA986860	37.7862	-0.0696034	0.284867	-0.244336	0.806971	0.894775
AB124611	40.9431	0.315153	0.272815	1.15519	0.248013	0.424304
AF067061	0.0847751	0.399408	3.79869	0.105143	0.916262	NA
AF067063	0	NA	NA	NA	NA	NA
AF251705	27.74	-0.799675	0.2933	-2.72648	0.00640142	0.0241333
AF357355	0.493201	0.0246576	2.62866	0.00938029	0.992516	NA
AF357359	0	NA	NA	NA	NA	NA
AF357399	8.02941	-0.388252	0.56021	-0.693048	0.488279	0.667484
AF357425	0.40755	-2.02325	3.06258	-0.660636	0.508846	NA
AF357426	0.564128	0.0218843	2.12875	0.0102804	0.991798	NA
AF366264	6.2718	1.10794	0.658046	1.68367	0.0922448	0.206782
AF529169	3.66355	-0.378201	0.824999	-0.458426	0.646647	0.792952
AI115009	6.14353	0.00538622	0.626361	0.00859922	0.993139	0.997118
AI118078	9.53269	-1.71496	0.546008	-3.14091	0.00168426	0.00780751
AI182371	36.9253	1.20989	0.321038	3.76869	0.000164104	0.00103296
AI197445	7.74964	0.562972	0.707577	0.795634	0.426245	0.61224
AI314180	2428.09	0.246754	0.135945	1.81509	0.0695096	0.166223
AI314278	0.62927	-0.488467	2.31776	-0.21075	0.833083	NA
AI317395	49.3529	0.424929	0.239478	1.77439	0.0759979	0.178385
AI413582	90.356	-0.0220806	0.19398	-0.11383	0.909373	0.953307
AI414108	229.924	-0.938045	0.158987	-5.90014	3.63203e-09	5.75213e-08
AI427809	142.071	0.0101222	0.133054	0.076076	0.939359	0.968916
AI429214	107.065	0.288153	0.173462	1.66118	0.0966771	0.214113
AI450353	121.98	0.0765801	0.153864	0.497713	0.618686	0.771229
AI463170	3.96749	-1.91481	0.795657	-2.40658	0.0161027	0.0519399
AI464131	136.851	-0.0738908	0.162211	-0.455524	0.648732	0.794347
AI467606	67.6037	0.0725293	0.212172	0.341842	0.73247	0.849826
AI504432	34.3002	0.296662	0.362639	0.818065	0.41332	0.600661
AI506816	10.8459	-0.808549	0.503834	-1.60479	0.108539	0.233088
AI507597	6.60786	-0.0458714	0.597811	-0.0767323	0.938836	0.968845
AI593442	5.38043	-0.103306	0.75867	-0.136168	0.891689	0.944019
AI597479	1106.87	0.239943	0.0905606	2.64953	0.00806045	0.029327
AI606473	0.569146	1.92903	3.47719	0.554766	0.579054	NA
AI607873	40.7659	-0.918538	0.276243	-3.32511	0.000883851	0.00451856
AI646519	0	NA	NA	NA	NA	NA
AI661453	232.389	-0.303686	0.129405	-2.34679	0.0189359	0.0594737
AI662270	147.494	-0.142609	0.655436	-0.217579	0.827757	0.906558
AI837181	950.533	-0.108092	0.11826	-0.914026	0.360703	0.551072
AI839979	11.9765	-0.15004	0.491888	-0.305028	0.760345	0.868504
AI846148	1032.8	-0.0828076	0.0895297	-0.924917	0.355009	0.5457
AI847159	1.92868	-0.086554	1.10649	-0.0782237	0.93765	0.968628
AI854517	205.487	-1.23971	0.164395	-7.54105	4.66213e-14	1.50938e-12
AI854703	67.2567	0.852107	0.240919	3.5369	0.000404856	0.0022878
AI987944	477.757	0.0295748	0.101008	0.292795	0.769679	0.874524
AK010878	175.811	-0.246444	0.123398	-1.99715	0.045809	0.120066
AU015228	59.5152	0.617489	0.303561	2.03415	0.0419367	0.112248
AU015791	2.791	0.772429	1.10437	0.699428	0.484285	0.663809
AU015836	1643.06	-2.34314	0.266062	-8.80675	1.28823e-18	7.20618e-17
AU016765	0	NA	NA	NA	NA	NA
AU018091	60.9998	-1.97501	0.232222	-8.50485	1.81836e-17	8.70719e-16
AU019823	1410.68	-0.166082	0.086456	-1.921	0.0547316	0.137881
AU019990	1.50781	-1.85697	1.32831	-1.39799	0.162117	0.311922
AU021063	0	NA	NA	NA	NA	NA
AU021092	69.4387	-0.329656	0.222413	-1.48218	0.138293	0.278412
AU022252	229.227	-0.29867	0.128033	-2.33275	0.0196612	0.06132
AU022751	350.473	0.923898	0.186254	4.96041	7.03445e-07	7.4121e-06
AU022754	1.09268	0.445894	1.72915	0.257869	0.796508	NA
AU022793	3.48014	-0.849804	0.871724	-0.974854	0.329633	0.518175
AU023762	0.686691	-1.46257	1.93271	-0.756746	0.449202	NA
AU040320	697.188	0.680031	0.0978473	6.94992	3.65491e-12	9.38984e-11
AU040972	0.944212	-0.598048	1.46727	-0.407592	0.683574	NA
AU041133	191.386	-0.0320863	0.142307	-0.225473	0.821611	0.90272
AV039307	24.7768	1.75208	0.40137	4.36525	1.2698e-05	0.000103278
AV051173	13.6159	0.494294	0.415274	1.19028	0.233935	0.408057
AV064505	0.0681962	0.399408	3.79869	0.105143	0.916262	NA
AV320801	370.942	-0.193083	0.418957	-0.460865	0.644895	0.791584
AW011738	16.2047	0.106037	0.512121	0.207054	0.835968	0.911708
AW046200	74.1235	0.306277	0.2023	1.51397	0.130032	0.266236
AW112010	0.659697	-1.86165	2.0656	-0.901261	0.36745	NA
AW146154	487.443	0.201497	0.113294	1.77852	0.0753178	0.177198
AW209491	479.61	-0.145011	0.0982834	-1.47544	0.140094	0.281172
AW495222	1.38127	3.55472	1.61505	2.20099	0.0277365	0.081164
AW549542	122.991	0.109685	0.16153	0.67904	0.497112	0.67548
AW549877	3929.7	0.093222	0.0895294	1.04124	0.297762	0.483288
AW551984	1180.06	0.0359042	0.0736242	0.487668	0.625785	0.776795
AW554918	705.213	0.312847	0.0957558	3.26714	0.00108642	0.00537973
AW822252	17.014	0.589206	0.390778	1.50778	0.131612	0.268508
AY074887	201.582	-0.507811	0.116474	-4.35985	1.30153e-05	0.000105738
AY358078	119.192	-0.269328	0.221755	-1.21453	0.224545	0.397385
AY512915	0	NA	NA	NA	NA	NA
AY512931	4.7562	-0.444348	0.805024	-0.551968	0.58097	0.74331
AY702102	1.56795	-0.0503152	1.32619	-0.0379397	0.969736	0.984797
AY702103	0.0877705	0.399408	3.79869	0.105143	0.916262	NA
AY761184	0	NA	NA	NA	NA	NA
AY761185	0	NA	NA	NA	NA	NA
Aaas	1288.34	-0.22095	0.0756675	-2.92002	0.00350011	0.0145874
Aacs	783.242	-0.481201	0.0925177	-5.20117	1.98035e-07	2.31911e-06
Aadac	2.36567	2.50562	2.03921	1.22873	0.219175	0.389653
Aadacl2	0.351194	1.52999	3.2205	0.475077	0.634732	NA
Aadacl3	0.91063	-4.24043	2.15955	-1.96357	0.0495805	NA
Aadat	1.59566	0.157032	1.44884	0.108385	0.91369	0.955314
Aaed1	254.403	0.464113	0.139636	3.32373	0.00088821	0.00453957
Aagab	1028.33	-0.307999	0.0668909	-4.6045	4.13466e-06	3.74412e-05
Aak1	2046.17	0.493121	0.117242	4.20602	2.59913e-05	0.000199845
Aamdc	515.422	0.299548	0.133745	2.23969	0.0251112	0.0750055
Aamp	3134.03	-0.248919	0.0733603	-3.3931	0.000691063	0.00364867
Aanat	4.55053	0.913313	0.798864	1.14326	0.252929	0.430179
Aar2	927.437	0.207294	0.0737634	2.81026	0.00495012	0.0194961
Aard	558.909	-0.0419458	0.129282	-0.324451	0.745596	0.859169
Aars	1760.43	-0.208013	0.0647684	-3.21164	0.00131978	0.00634968
Aars2	497.759	-0.0715069	0.0980026	-0.729643	0.465608	0.646788
Aarsd1	714.684	-0.243783	0.0857649	-2.84245	0.00447682	0.0179267
Aasdh	530.954	-0.180207	0.118544	-1.52016	0.12847	0.263948
Aasdhppt	1135.57	-0.268815	0.0791573	-3.39596	0.000683873	0.00361335
Aass	65.9998	0.19092	0.244543	0.780718	0.434968	0.619966
Aatf	909.111	-0.404265	0.0740578	-5.45878	4.79422e-08	6.31815e-07
Aatk	57.2001	0.266763	0.291104	0.916386	0.359464	0.549914
Abat	2911.73	0.248641	0.0913293	2.72246	0.0064797	0.0243841
Abca1	1283.11	0.164762	0.0896858	1.8371	0.0661951	0.160095
Abca12	8.43381	1.74944	0.698142	2.50585	0.0122159	0.0414877
Abca13	31.5318	0.127045	0.360959	0.351965	0.724865	0.844881
Abca14	0	NA	NA	NA	NA	NA
Abca15	0.354329	0.57753	2.7633	0.209	0.834448	NA
Abca16	12.8525	0.87631	0.520666	1.68306	0.0923641	0.206973
Abca17	30.2206	0.962175	0.321835	2.98966	0.0027929	0.0120547
Abca2	854.23	0.462506	0.135677	3.40887	0.000652319	0.00347271
Abca3	606.159	0.785182	0.0896372	8.75955	1.96024e-18	1.064e-16
Abca4	239.453	0.146667	0.130286	1.12573	0.26028	0.43917
Abca5	425.135	0.680077	0.133431	5.09683	3.45388e-07	3.85469e-06
Abca6	28.1591	0.129768	0.339057	0.382732	0.701919	0.830337
Abca7	295.245	0.128852	0.151048	0.853056	0.393628	0.582875
Abca8a	8.96956	0.981131	0.634412	1.54652	0.121979	0.25433
Abca8b	113.851	0.306644	0.242066	1.26677	0.205236	0.371438
Abca9	88.9124	-0.171638	0.188387	-0.911088	0.362249	0.552418
Abcb10	1098.37	-0.421398	0.13774	-3.05937	0.00221802	0.00989564
Abcb11	0.82712	-0.149041	2.10249	-0.0708876	0.943487	NA
Abcb1a	78.8419	0.237738	0.200993	1.18282	0.23688	0.411774
Abcb1b	47.4168	-0.473619	0.219049	-2.16216	0.0306058	0.087859
Abcb4	89.0996	0.172429	0.325557	0.529643	0.59636	0.754428
Abcb5	0.452205	-1.93842	2.4989	-0.775709	0.437921	NA
Abcb6	646.165	0.574038	0.10365	5.53825	3.05507e-08	4.15799e-07
Abcb7	1133.48	-0.184327	0.154664	-1.19179	0.233345	0.407518
Abcb8	842.161	0.0710012	0.0807931	0.878803	0.379508	0.569153
Abcb9	38.0826	0.616021	0.257813	2.38941	0.0168755	0.0540769
Abcc1	991.183	0.015765	0.0654322	0.240936	0.809605	0.896337
Abcc10	621.739	0.488078	0.0825966	5.90918	3.43812e-09	5.47347e-08
Abcc12	3.14842	-0.383473	0.874175	-0.438668	0.660902	0.803391
Abcc2	131.97	-1.20396	0.187405	-6.42436	1.32422e-10	2.70644e-09
Abcc3	82.9786	0.0710443	0.185375	0.383246	0.701537	0.830123
Abcc4	327.655	-1.45078	0.177375	-8.17916	2.85827e-16	1.22444e-14
Abcc5	3054.49	0.0775747	0.0942743	0.822862	0.410587	0.598072
Abcc6	10.4153	0.719429	0.515363	1.39596	0.162725	0.312928
Abcc8	5.21638	0.636946	0.729184	0.873505	0.382388	0.57195
Abcc9	310.583	-0.250704	0.119423	-2.09929	0.0357917	0.0991222
Abcd1	760.683	0.153449	0.141873	1.0816	0.279431	0.462023
Abcd2	152.384	-0.0361748	0.128439	-0.281651	0.778211	0.879608
Abcd3	1478.12	-0.0087435	0.0619027	-0.141246	0.887676	0.941813
Abcd4	472.585	-0.594792	0.0829118	-7.17379	7.29492e-13	2.02794e-11
Abce1	4480.65	-0.124653	0.077748	-1.6033	0.108869	0.233571
Abcf1	1800.32	-0.429092	0.067196	-6.38568	1.70641e-10	3.43008e-09
Abcf2	2931.99	-0.201649	0.0770936	-2.61564	0.00890599	0.0318741
Abcf3	1362.13	-0.10893	0.0681455	-1.59849	0.109934	0.235222
Abcg1	351.26	-1.61977	0.128072	-12.6474	1.15675e-36	4.40817e-34
Abcg2	1314.12	-0.364133	0.0891489	-4.08454	4.41636e-05	0.000320571
Abcg3	10.8963	0.0415879	0.480512	0.0865492	0.93103	0.965442
Abcg4	163.171	0.226071	0.208573	1.0839	0.27841	0.460751
Abcg5	16.8493	0.271653	0.45431	0.597947	0.549875	0.719891
Abcg8	4.99543	-0.527508	0.675733	-0.780646	0.435011	0.619966
Abhd1	3.48411	1.08037	0.921168	1.17282	0.240867	0.416198
Abhd10	781.876	-0.216651	0.0759184	-2.85374	0.00432083	0.0174166
Abhd11	1052.21	-0.427058	0.082662	-5.16631	2.38756e-07	2.75367e-06
Abhd11os	56.7977	-1.22801	0.243172	-5.04995	4.41932e-07	4.82616e-06
Abhd12	1277.37	0.150841	0.083179	1.81345	0.069762	0.166656
Abhd12b	0.385879	0.655999	3.15008	0.208249	0.835035	NA
Abhd13	1036.27	0.0504809	0.0882845	0.571798	0.567459	0.732117
Abhd14a	919.692	-0.361459	0.0962027	-3.75726	0.000171784	0.00107428
Abhd14b	632.857	0.0492473	0.0892049	0.55207	0.580901	0.743273
Abhd15	19.7081	0.192366	0.372891	0.515876	0.605941	0.761673
Abhd16a	636.5	0.291088	0.0914079	3.18449	0.00145009	0.00688249
Abhd16b	8.41891	0.521924	0.551392	0.946556	0.343865	0.533773
Abhd17a	1736.21	-0.191818	0.107684	-1.7813	0.0748628	0.176354
Abhd17b	703.312	-0.0734264	0.0926127	-0.792833	0.427875	0.613876
Abhd17c	1143.02	-0.285441	0.0697134	-4.0945	4.23089e-05	0.000308578
Abhd2	138.2	-0.308153	0.34688	-0.888355	0.37435	0.564937
Abhd3	551.826	0.169935	0.100217	1.69567	0.0899491	0.202754
Abhd4	2321.11	-0.0459929	0.0910316	-0.505241	0.613389	0.766716
Abhd5	339.643	0.17768	0.0944085	1.88203	0.0598315	0.148398
Abhd6	563.321	0.270818	0.0908444	2.98111	0.00287202	0.0123612
Abhd8	774.803	0.260798	0.0868286	3.0036	0.00266805	0.0115924
Abi1	1884.63	0.0881666	0.0745503	1.18265	0.23695	0.411848
Abi2	1825.97	0.0352424	0.0763932	0.461329	0.644563	0.791423
Abi3	56.9096	-0.135985	0.235212	-0.578141	0.563169	0.729437
Abi3bp	198.596	0.238559	0.159079	1.49963	0.133711	0.27164
Abl1	3964.06	0.0339862	0.0660997	0.514166	0.607136	0.76278
Abl2	1747.84	-0.620436	0.155943	-3.97862	6.93174e-05	0.000478654
Ablim1	1351.35	-0.0571767	0.166094	-0.344243	0.730664	0.848611
Ablim2	74.5061	0.329655	0.207515	1.58858	0.112155	0.238995
Ablim3	618.274	-0.127466	0.128175	-0.99447	0.319994	0.507744
Abo	4.52613	0.334281	0.807739	0.413848	0.678985	0.815763
Abr	1902.73	0.360153	0.0612296	5.88201	4.05306e-09	6.38575e-08
Abra	1.60541	-3.08734	1.49711	-2.0622	0.0391886	0.106466
Abracl	702.158	-0.223906	0.13357	-1.67632	0.0936757	0.209118
Abt1	704.838	-0.348186	0.0916402	-3.79949	0.000144995	0.000923485
Abtb1	694.846	-0.12445	0.0854851	-1.4558	0.145447	0.288684
Abtb2	266.396	0.508406	0.123166	4.12781	3.66232e-05	0.000272104
Acaa1a	1469.42	-0.100391	0.0814729	-1.2322	0.217874	0.388111
Acaa1b	803.604	-0.20988	0.103293	-2.03188	0.0421656	0.112653
Acaa2	5671.16	0.0100535	0.0666603	0.150817	0.88012	0.937524
Acaca	1589.7	0.372542	0.0804219	4.63234	3.6155e-06	3.31669e-05
Acacb	348.305	-0.797318	0.117081	-6.80995	9.76339e-12	2.32845e-10
Acad10	234.561	0.467497	0.106021	4.40948	1.03619e-05	8.63504e-05
Acad11	642.917	-0.0836311	0.0780439	-1.07159	0.283904	0.467419
Acad12	205.375	0.426679	0.113851	3.74768	0.000178474	0.00110929
Acad8	1084.11	-0.185834	0.075988	-2.44557	0.0144623	0.0476312
Acad9	1021.99	0.00488217	0.0650123	0.0750961	0.940138	0.969119
Acadl	1934.53	-0.181468	0.072743	-2.49464	0.0126084	0.042568
Acadm	1699.02	-0.380812	0.0611047	-6.23212	4.60168e-10	8.55029e-09
Acads	892.876	-0.211199	0.0959909	-2.2002	0.0277925	0.0813019
Acadsb	1756.14	0.132823	0.0727374	1.82607	0.0678402	0.163185
Acadvl	1561.34	0.317849	0.080107	3.9678	7.25395e-05	0.000496963
Acan	115.371	0.540485	0.210422	2.56857	0.0102118	0.0356479
Acap1	25.2473	1.09098	0.347788	3.13691	0.00170738	0.00789867
Acap2	1473.77	0.233716	0.0890887	2.62341	0.00870536	0.0312723
Acap3	451.259	0.12502	0.0893916	1.39857	0.161942	0.311619
Acat1	2196.88	-0.12202	0.0680033	-1.79432	0.072762	0.172404
Acat2	2562.64	0.0612869	0.0711884	0.860911	0.389287	0.578413
Acat3	464.101	0.396424	0.115155	3.44253	0.00057629	0.0031234
Acbd3	1413.36	-0.0243135	0.0950153	-0.25589	0.798036	0.890458
Acbd4	206.243	-0.0895751	0.118112	-0.758391	0.448217	0.632037
Acbd5	796.265	0.0473584	0.0910388	0.5202	0.602924	0.759541
Acbd6	922.817	-0.0983343	0.0886924	-1.10871	0.267555	0.447933
Acbd7	5.3942	-0.622228	0.607254	-1.02466	0.305524	0.491785
Accs	381.105	0.0391826	0.112436	0.348488	0.727474	0.84666
Accsl	1.08105	-0.792404	1.55229	-0.510473	0.60972	NA
Acd	700.145	-0.159679	0.117573	-1.35813	0.174421	0.328885
Ace	22.8462	-0.00989624	0.342015	-0.0289351	0.976916	0.988481
Ace2	494.959	-0.137832	0.0880571	-1.56526	0.117523	0.247351
Ace3	0.185131	0.399399	3.79869	0.105141	0.916264	NA
Acer1	23.3475	0.371266	0.383577	0.967905	0.333092	0.521922
Acer2	226.45	-0.129266	0.140631	-0.91918	0.358001	0.548586
Acer3	783.473	1.76969	0.171203	10.3368	4.8023e-25	5.97576e-23
Ache	62.3425	0.146389	0.699133	0.209386	0.834147	0.910654
Acin1	6358.52	0.0194408	0.0552237	0.352038	0.72481	0.844881
Ackr1	61.8783	-0.0839018	0.388042	-0.216219	0.828817	0.907186
Ackr2	14.8153	0.24351	0.436579	0.557768	0.577003	0.740409
Ackr3	134.545	0.0318828	0.173638	0.183616	0.854314	0.922117
Ackr4	265.472	0.232638	0.114903	2.02465	0.042903	0.114171
Acly	2689.62	0.112348	0.0587417	1.91257	0.0558027	0.140135
Acmsd	11.8265	0.471788	0.553195	0.852843	0.393746	0.582969
Acnat1	11.8062	-0.925811	0.461225	-2.00729	0.0447188	0.117867
Acnat2	1.47731	-1.49023	1.54356	-0.965445	0.334322	0.523132
Aco1	1641.21	-0.299532	0.0795081	-3.76732	0.00016501	0.00103795
Aco2	5170.7	-0.0575722	0.0629343	-0.914799	0.360297	0.550774
Acot1	2308.14	-0.525938	0.0881022	-5.96964	2.3778e-09	3.89389e-08
Acot10	253.713	-0.46555	0.15308	-3.04122	0.00235618	0.0104155
Acot11	151.701	-0.0314918	0.143399	-0.219609	0.826175	0.905585
Acot12	2.26652	-0.228681	1.04745	-0.218322	0.827178	0.90625
Acot13	711.05	-0.266321	0.0967133	-2.75372	0.00589228	0.0225296
Acot2	1378.58	-0.337107	0.0934812	-3.60615	0.000310769	0.00181269
Acot3	325.591	-0.607442	0.138958	-4.3714	1.23452e-05	0.000100632
Acot4	170.725	-0.302828	0.174844	-1.73199	0.0832747	0.1911
Acot5	371.718	-0.480272	0.146178	-3.28552	0.00101793	0.00509858
Acot6	206.662	-0.230994	0.142307	-1.6232	0.104546	0.226905
Acot7	877.509	0.387234	0.106087	3.65015	0.000262082	0.00155954
Acot8	278.91	-0.0461417	0.119176	-0.387172	0.698629	0.828256
Acot9	566.928	-0.475022	0.1217	-3.90322	9.49199e-05	0.000632062
Acox1	1394.91	0.0977776	0.0620907	1.57476	0.115313	0.243934
Acox2	0.676227	-0.177696	3.79869	-0.046778	0.96269	NA
Acox3	375.816	0.130612	0.0980614	1.33194	0.182881	0.340727
Acoxl	10.1216	-0.112115	0.49148	-0.228117	0.819556	0.901841
Acp1	2425.17	-0.0443954	0.0996429	-0.445545	0.655926	0.79972
Acp2	1464.43	0.458146	0.0677817	6.75913	1.38822e-11	3.25138e-10
Acp5	322.125	0.0823216	0.41786	0.197008	0.843821	0.91598
Acp6	458.503	-0.328815	0.103388	-3.18041	0.00147068	0.00696754
Acpp	20.0712	-1.41021	0.343347	-4.10726	4.00382e-05	0.00029472
Acpt	1.86556	1.32076	1.44433	0.914444	0.360484	0.550921
Acr	24.7096	0.0903904	0.359306	0.251569	0.801374	0.892022
Acrbp	328.011	0.00859562	0.104982	0.081877	0.934744	0.96732
Acrv1	0.0945505	-0.17767	3.79869	-0.0467714	0.962695	NA
Acsbg1	1487.2	0.0313691	0.0982153	0.319391	0.74943	0.861308
Acsbg2	6.10089	-4.50274	0.899418	-5.00628	5.54926e-07	5.95699e-06
Acsf2	1034.39	0.0632289	0.0841979	0.750956	0.452679	0.635927
Acsf3	326.825	0.232834	0.103342	2.25304	0.0242563	0.0729405
Acsl1	680.026	-0.466612	0.0895275	-5.21194	1.86878e-07	2.19973e-06
Acsl3	1741.47	-0.118832	0.101185	-1.1744	0.240235	0.415679
Acsl4	473.049	0.276924	0.0875325	3.16367	0.00155791	0.00731075
Acsl5	547.402	-0.0144273	0.134301	-0.107425	0.914452	0.955673
Acsl6	19.3982	0.694191	0.392807	1.76726	0.077185	0.180377
Acsm1	0	NA	NA	NA	NA	NA
Acsm2	0.19649	-1.13944	3.79869	-0.299955	0.764212	NA
[truncated: 22,422 more rows]

## Sheet: DESeq_WT_Stra8KO
	baseMean	log2FoldChange	lfcSE	stat	pvalue	padj
0610005C13Rik	11.1948	-0.950992	0.424383	-2.24088	0.0250339	0.14687
0610007P14Rik	1328.24	0.00735675	0.0738778	0.0995801	0.920678	0.970401
0610009B22Rik	553.759	-0.152755	0.107131	-1.42588	0.153904	0.441741
0610009L18Rik	89.8249	-0.151725	0.172865	-0.877708	0.380102	0.672616
0610009O20Rik	886.342	0.0205163	0.0976377	0.210127	0.833568	0.933833
0610010B08Rik	33.3357	0.623848	0.300964	2.07284	0.0381875	0.194308
0610010F05Rik	603.013	0.278945	0.119147	2.34118	0.0192229	0.12108
0610010K14Rik	1309.41	0.100327	0.0801926	1.25108	0.210907	0.513246
0610011F06Rik	552.983	0.0966904	0.0853437	1.13295	0.257234	0.563657
0610012G03Rik	1053.33	-0.0937333	0.0836515	-1.12052	0.262492	0.569524
0610030E20Rik	767.851	-0.0586849	0.0849963	-0.69044	0.489917	0.756008
0610031O16Rik	0	NA	NA	NA	NA	NA
0610037L13Rik	817.623	0.0836576	0.0730061	1.1459	0.251837	0.558121
0610038B21Rik	32.4931	0.0623198	0.290559	0.214482	0.830171	0.932139
0610039H22Rik	0.435648	-0.113532	2.30846	-0.0491806	0.960775	NA
0610039K10Rik	26.6629	-0.025535	0.333855	-0.0764853	0.939033	0.978152
0610040B10Rik	54.2273	0.0365822	0.249802	0.146444	0.883571	0.955957
0610040F04Rik	4.57761	-0.257326	0.738665	-0.348366	0.727566	NA
0610040J01Rik	9.35432	0.176794	0.535085	0.330403	0.741095	0.895995
0610043K17Rik	3.26253	0.226042	0.905543	0.24962	0.802881	NA
1010001N08Rik	204.405	-0.324648	0.12462	-2.60511	0.00918452	0.0722015
1110001J03Rik	335.625	0.0683396	0.127443	0.536235	0.591796	0.82047
1110002L01Rik	75.3493	-0.0822989	0.22347	-0.368277	0.712666	0.881118
1110004E09Rik	556.788	0.0222958	0.0899915	0.247754	0.804325	0.921617
1110004F10Rik	3262.14	0.080744	0.0737886	1.09426	0.27384	0.579944
1110006O24Rik	63.6325	0.108839	0.209401	0.519764	0.603228	0.827927
1110007C09Rik	228.539	0.214186	0.131509	1.62868	0.10338	0.356555
1110008F13Rik	964.88	-0.105669	0.0769847	-1.3726	0.169876	0.46298
1110008L16Rik	648.85	-0.121993	0.0708544	-1.72174	0.0851172	0.319774
1110008P14Rik	304.021	-0.126359	0.121522	-1.0398	0.298433	0.604045
1110012L19Rik	557.071	-0.0990787	0.102433	-0.967259	0.333415	0.63507
1110015O18Rik	0	NA	NA	NA	NA	NA
1110017D15Rik	5.53212	0.868508	0.676472	1.28388	0.199184	NA
1110019D14Rik	152.148	0.504776	0.17117	2.94897	0.00318833	0.0322543
1110020A21Rik	17.0307	-0.239218	0.383553	-0.623689	0.532832	0.786118
1110025L11Rik	0	NA	NA	NA	NA	NA
1110028F11Rik	3.82747	-0.675557	0.746517	-0.904944	0.365495	NA
1110028F18Rik	0.37838	-1.0386	3.13672	-0.331111	0.740561	NA
1110032A03Rik	421.375	-0.0876036	0.100466	-0.87197	0.383225	0.675348
1110032F04Rik	56.2911	-0.248355	0.206878	-1.20049	0.229948	0.534391
1110034G24Rik	296.978	-0.0286521	0.120032	-0.238703	0.811336	0.924546
1110036E04Rik	0.170136	0.512274	3.79876	0.134853	0.892728	NA
1110037F02Rik	1980.3	0.051951	0.0811988	0.6398	0.522303	0.777961
1110038B12Rik	777.515	-0.00227863	0.138593	-0.0164411	0.986882	0.995517
1110038F14Rik	809.668	-0.0115198	0.112623	-0.102286	0.918529	0.970135
1110046J04Rik	58.669	-0.255518	0.23257	-1.09867	0.271911	0.5779
1110051M20Rik	513.891	-0.0262774	0.0856159	-0.306922	0.758903	0.904818
1110058D11Rik	0.216329	0.512274	3.79876	0.134853	0.892728	NA
1110059E24Rik	811.769	-0.139734	0.0930719	-1.50136	0.133263	0.409648
1110059G10Rik	445.949	0.0784179	0.109983	0.713003	0.475844	0.745979
1110065P20Rik	729.439	-0.0851636	0.0985671	-0.864016	0.387579	0.678827
1190002F15Rik	191.931	-0.207786	0.132915	-1.5633	0.117982	0.383376
1190002N15Rik	3425.18	0.0347504	0.0679556	0.511369	0.609093	0.831103
1190003K10Rik	0.10194	-0.0648009	3.79876	-0.0170584	0.98639	NA
1190005I06Rik	4.05328	-0.377071	0.789177	-0.477803	0.632791	NA
1190007I07Rik	371.717	0.0567528	0.101992	0.556443	0.577908	0.813283
1200014J11Rik	1536.29	0.209579	0.0826545	2.5356	0.0112256	0.083481
1300002E11Rik	514.616	-0.0356368	0.140339	-0.253933	0.799547	0.919643
1300017J02Rik	36.9915	-0.453739	0.365906	-1.24004	0.214959	0.51787
1500004A13Rik	370.586	0.249907	0.120819	2.06843	0.0385993	0.195974
1500009C09Rik	1.81623	-0.540826	1.36242	-0.396959	0.691398	NA
1500009L16Rik	295.612	-0.0969691	0.143468	-0.675891	0.49911	0.761413
1500011B03Rik	465.959	-0.148	0.0855382	-1.73022	0.0835903	0.316109
1500011K16Rik	285.733	-0.15701	0.122606	-1.2806	0.200335	0.501516
1500012F01Rik	856.969	-0.0389467	0.115097	-0.338381	0.735076	0.8928
1500012K07Rik	0.669716	-0.813489	2.21486	-0.367288	0.713405	NA
1500015A07Rik	228.465	-0.127589	0.115242	-1.10714	0.268231	0.574419
1500015L24Rik	0	NA	NA	NA	NA	NA
1500015O10Rik	25.6679	-0.218502	0.384805	-0.567824	0.570154	0.808243
1500017E21Rik	1.14411	0.121967	1.57509	0.0774345	0.938278	NA
1500026H17Rik	37.1101	-0.0560066	0.251903	-0.222334	0.824054	0.929741
1600002D24Rik	2.07841	0.319232	1.12636	0.283419	0.776855	NA
1600002H07Rik	514.463	-0.0408688	0.0834409	-0.489793	0.62428	0.837094
1600002K03Rik	158.712	0.269245	0.180296	1.49335	0.135346	0.412972
1600010M07Rik	1.08778	-1.01003	1.40477	-0.718999	0.472141	NA
1600012H06Rik	1653.17	-0.0230369	0.0602554	-0.382322	0.702223	0.876847
1600014C10Rik	664.059	0.0547438	0.0883813	0.619405	0.535649	0.787703
1600014C23Rik	2.72585	-1.6604	1.00671	-1.64934	0.0990788	NA
1600014K23Rik	7.37767	1.61946	0.879775	1.84077	0.0656557	0.273613
1600015I10Rik	0	NA	NA	NA	NA	NA
1600019K03Rik	0.223712	0.118769	3.65838	0.032465	0.974101	NA
1600020E01Rik	344.336	-0.0819106	0.118825	-0.68934	0.49061	0.756434
1600023N17Rik	34.3541	0.48643	0.287943	1.68933	0.0911567	0.333094
1600025M17Rik	0.0859343	0.512277	3.79876	0.134854	0.892728	NA
1600027J07Rik	0.170709	1.10224	3.79763	0.290243	0.77163	NA
1600029I14Rik	0.655058	-0.470626	2.18903	-0.214993	0.829773	NA
1600029O15Rik	162.22	-0.284406	0.124526	-2.2839	0.0223775	0.135157
1700001C02Rik	0.460166	-1.28514	2.50059	-0.513934	0.607298	NA
1700001C19Rik	1.70946	-1.04988	1.30297	-0.805762	0.42038	NA
1700001D01Rik	0.0681962	0.512277	3.79876	0.134854	0.892728	NA
1700001F09Rik	0	NA	NA	NA	NA	NA
1700001G01Rik	0	NA	NA	NA	NA	NA
1700001G11Rik	22.3926	-0.0146719	0.330742	-0.0443605	0.964617	0.986803
1700001G17Rik	28.0297	0.00440594	0.313936	0.0140345	0.988802	0.996155
1700001J03Rik	2.51811	-0.120747	0.945727	-0.127676	0.898405	NA
1700001J11Rik	34.1138	-0.18244	0.320573	-0.569105	0.569285	0.80753
1700001K19Rik	6.00963	-0.126017	0.6645	-0.189642	0.84959	NA
1700001K23Rik	2.41701	-0.324321	0.971026	-0.333999	0.738381	NA
1700001L05Rik	857.247	1.56083	0.161286	9.6774	3.76167e-22	1.74724e-19
1700001L19Rik	25.376	0.561299	0.342698	1.63788	0.101447	0.352896
1700001O22Rik	28.2689	0.263285	0.321215	0.819655	0.412413	0.695599
1700001P01Rik	2.32194	0.0284593	1.262	0.022551	0.982008	NA
1700003C15Rik	0	NA	NA	NA	NA	NA
1700003D09Rik	0.253523	1.10223	3.79763	0.290242	0.771631	NA
1700003E16Rik	12.2619	0.443883	0.469077	0.946291	0.344	0.643546
1700003E24Rik	0	NA	NA	NA	NA	NA
1700003F12Rik	38.3038	-0.0843394	0.336987	-0.250275	0.802375	0.921006
1700003G13Rik	0.070741	-1.02659	3.79876	-0.270242	0.786974	NA
1700003G18Rik	3.20733	0.727504	0.879015	0.827636	0.407877	NA
1700003H04Rik	0	NA	NA	NA	NA	NA
1700003I22Rik	0	NA	NA	NA	NA	NA
1700003L19Rik	0	NA	NA	NA	NA	NA
1700003M02Rik	3.73869	-0.476012	0.751766	-0.633191	0.526609	NA
1700003M07Rik	15.1848	-0.0669413	0.455849	-0.14685	0.883251	0.955674
1700003P14Rik	0	NA	NA	NA	NA	NA
1700006A11Rik	0.262495	-1.02659	3.79876	-0.270244	0.786973	NA
1700006E09Rik	0.10194	-0.0648009	3.79876	-0.0170584	0.98639	NA
1700006F04Rik	0.375455	0.139256	3.17248	0.043895	0.964988	NA
1700006H21Rik	0.0877705	0.512277	3.79876	0.134854	0.892728	NA
1700007B14Rik	13.9225	0.0541757	0.516803	0.104829	0.916512	0.969524
1700007F19Rik	0.411388	-1.03199	3.02741	-0.340884	0.733191	NA
1700007G11Rik	4.3153	-0.711718	0.823373	-0.864394	0.387371	NA
1700007J10Rik	12.0367	-0.789171	0.56006	-1.40908	0.158811	0.446985
1700007K09Rik	2.55344	0.0509043	1.03892	0.0489975	0.960921	NA
1700007K13Rik	93.3169	-0.50769	0.19333	-2.62602	0.00863888	0.0690912
1700007L15Rik	100.295	0.591603	0.202408	2.92283	0.00346869	0.0345318
1700007P06Rik	0.423224	0.137662	2.66517	0.0516523	0.958806	NA
1700008C04Rik	0.0681962	0.512277	3.79876	0.134854	0.892728	NA
1700008J07Rik	169.434	0.290283	0.136314	2.12952	0.0332116	0.176933
1700008K24Rik	0.162747	-0.449511	3.79876	-0.118331	0.905806	NA
1700008O03Rik	20.1437	0.618099	0.362523	1.70499	0.0881964	0.326906
1700008P02Rik	0	NA	NA	NA	NA	NA
1700009C05Rik	0.189101	-1.9734	3.7499	-0.526255	0.598711	NA
1700009J07Rik	0.10194	-0.0648009	3.79876	-0.0170584	0.98639	NA
1700009N14Rik	0.909039	0.00548496	1.75946	0.00311741	0.997513	NA
1700010B08Rik	1.62042	-1.83316	1.31042	-1.39892	0.161838	NA
1700010D01Rik	0.207255	-2.08937	3.73943	-0.558739	0.57634	NA
1700010I02Rik	0	NA	NA	NA	NA	NA
1700010I14Rik	58.1965	-0.415086	0.191559	-2.16689	0.0302436	0.166442
1700010J16Rik	0	NA	NA	NA	NA	NA
1700010K23Rik	0	NA	NA	NA	NA	NA
1700011A15Rik	4.87597	0.116754	0.823945	0.141701	0.887316	NA
1700011B04Rik	0.0945505	-1.02659	3.79876	-0.270242	0.786974	NA
1700011C11Rik	0.39674	-1.92034	2.66534	-0.720484	0.471227	NA
1700011E24Rik	0.239939	1.08062	3.57751	0.302059	0.762607	NA
1700011H14Rik	0.253062	-1.22855	3.47108	-0.353939	0.723385	NA
1700011I03Rik	0.90303	2.64256	1.9454	1.35836	0.174348	NA
1700011L22Rik	0.866836	0.027453	1.95867	0.0140162	0.988817	NA
1700011M02Rik	5.72955	-0.426717	0.617181	-0.691398	0.489316	NA
1700012A03Rik	0.10194	-0.0648009	3.79876	-0.0170584	0.98639	NA
1700012B07Rik	0.562139	-0.449518	2.2524	-0.199573	0.841815	NA
1700012B09Rik	1.57502	0.508869	1.22792	0.414414	0.678571	NA
1700012C14Rik	18.1003	0.048084	0.364182	0.132033	0.894958	0.96105
1700012D01Rik	20.3604	0.0600952	0.374034	0.160668	0.872355	0.951102
1700012D14Rik	20.5497	0.692775	0.380093	1.82265	0.0683571	0.281052
1700012D16Rik	0.294874	0.139691	3.364	0.0415251	0.966877	NA
1700012H19Rik	0	NA	NA	NA	NA	NA
1700012I11Rik	0	NA	NA	NA	NA	NA
1700012L04Rik	1.13285	1.03676	1.5297	0.677759	0.497925	NA
1700012P22Rik	0	NA	NA	NA	NA	NA
1700013D24Rik	0	NA	NA	NA	NA	NA
1700013F07Rik	0.772273	3.17914	3.17377	1.00169	0.316492	NA
1700013G24Rik	0.19649	-1.02659	3.79876	-0.270243	0.786973	NA
1700013H16Rik	790.898	1.21805	0.278256	4.37745	1.20074e-05	0.000310339
1700015E13Rik	2.01157	-1.27884	1.72037	-0.743353	0.457268	NA
1700015F17Rik	0.238103	1.08061	3.5862	0.301325	0.763166	NA
1700015G11Rik	0.199165	1.10224	3.79763	0.290243	0.77163	NA
1700016C15Rik	0.34727	-0.449516	3.22129	-0.139545	0.889019	NA
1700016D06Rik	2.33552	0.686799	1.00754	0.681662	0.495453	NA
1700016G22Rik	1.53864	-2.12013	1.38676	-1.52884	0.126304	NA
1700016H13Rik	1.40841	0.41781	1.44586	0.28897	0.772604	NA
1700016K19Rik	15.3701	-0.0733267	0.381552	-0.19218	0.847601	0.940128
1700016L04Rik	1.5215	-1.37285	1.20023	-1.14382	0.252698	NA
1700016L21Rik	0	NA	NA	NA	NA	NA
1700016P04Rik	0	NA	NA	NA	NA	NA
1700017B05Rik	1591.22	-0.0970914	0.0816022	-1.18981	0.234119	0.539563
1700017D01Rik	0	NA	NA	NA	NA	NA
1700017G19Rik	0.10194	-0.0648009	3.79876	-0.0170584	0.98639	NA
1700017J07Rik	0.534817	0.597972	2.32227	0.257495	0.796797	NA
1700017L05Rik	0	NA	NA	NA	NA	NA
1700017N19Rik	0	NA	NA	NA	NA	NA
1700018A04Rik	0	NA	NA	NA	NA	NA
1700018B08Rik	17.6728	1.19171	0.423148	2.81629	0.00485814	0.0449929
1700018B24Rik	126.892	1.00758	0.26965	3.73661	0.000186516	0.00321972
1700018C11Rik	0.205905	-1.02659	3.79876	-0.270243	0.786973	NA
1700018F24Rik	0.226257	-1.07634	3.77639	-0.285017	0.775631	NA
1700018G05Rik	1.35529	-0.436214	1.33047	-0.327865	0.743013	NA
1700018L02Rik	32.3948	-0.193671	0.262417	-0.738028	0.460497	0.733996
1700019A02Rik	11.3072	0.633858	0.569207	1.11358	0.265459	0.571219
1700019B03Rik	2.59428	-1.27001	1.14441	-1.10975	0.267108	NA
1700019B21Rik	4.33472	3.16699	1.16812	2.71118	0.00670446	NA
1700019C18Rik	0.173705	1.10224	3.79763	0.290243	0.77163	NA
1700019D03Rik	75.5705	-0.99451	0.415703	-2.39235	0.0167407	0.11005
1700019E08Rik	0.434462	1.50282	2.66523	0.56386	0.57285	NA
1700019G17Rik	448.87	0.269311	0.0916967	2.93698	0.00331426	0.033321
1700019G24Rik	0.720235	-0.687008	1.87052	-0.367283	0.713408	NA
1700019L03Rik	25.1459	-0.419532	0.303424	-1.38266	0.166769	0.45853
1700019M22Rik	0	NA	NA	NA	NA	NA
1700019N19Rik	0.282334	0.512271	3.79876	0.134852	0.892729	NA
1700019O17Rik	0.609496	-1.46734	2.19331	-0.669009	0.50349	NA
1700020A23Rik	2.69062	0.0193343	0.942483	0.0205143	0.983633	NA
1700020D05Rik	14.7692	0.159047	0.456107	0.348705	0.727311	0.889033
1700020D14Rik	0	NA	NA	NA	NA	NA
1700020G17Rik	0.10194	-0.0648009	3.79876	-0.0170584	0.98639	NA
1700020I14Rik	801.394	-0.110873	0.284374	-0.389885	0.696621	0.873325
1700020L24Rik	171.447	0.0802486	0.157988	0.507941	0.611494	0.831748
1700020M21Rik	0.69785	1.90885	2.77003	0.689108	0.490755	NA
1700020N01Rik	7.63291	1.3138	0.603503	2.17696	0.0294836	0.164036
1700020N15Rik	1.98467	-1.42916	1.10995	-1.2876	0.197887	NA
1700020N18Rik	0	NA	NA	NA	NA	NA
1700021F05Rik	804.543	-0.238685	0.0896292	-2.66302	0.0077442	0.0635712
1700021F07Rik	0.745986	2.05827	2.32364	0.885795	0.375728	NA
1700021K19Rik	1015.48	0.299543	0.0962846	3.11101	0.00186447	0.0209039
1700021N21Rik	0.715551	2.86696	1.87914	1.52568	0.12709	NA
1700022A21Rik	0	NA	NA	NA	NA	NA
1700022A22Rik	0	NA	NA	NA	NA	NA
1700022E09Rik	0	NA	NA	NA	NA	NA
1700022H01Rik	3.25915	0.608408	0.844179	0.72071	0.471088	NA
1700022H16Rik	0	NA	NA	NA	NA	NA
1700022I11Rik	2.79486	2.1591	1.27635	1.69162	0.0907192	NA
1700023C21Rik	0	NA	NA	NA	NA	NA
1700023F02Rik	0	NA	NA	NA	NA	NA
1700023F06Rik	20.052	-0.115013	0.355285	-0.323722	0.746149	0.897851
1700024B18Rik	0	NA	NA	NA	NA	NA
1700024F13Rik	10.8442	-0.987973	0.456264	-2.16536	0.0303604	0.16669
1700024G13Rik	0.807252	-1.95796	2.04821	-0.955935	0.339105	NA
1700024I08Rik	0	NA	NA	NA	NA	NA
1700024N05Rik	0.319959	-2.71927	3.69479	-0.735976	0.461745	NA
1700024P04Rik	0	NA	NA	NA	NA	NA
1700024P16Rik	1.55381	2.46466	1.58884	1.55123	0.120847	NA
1700025B11Rik	0.0877705	0.512277	3.79876	0.134854	0.892728	NA
1700025C18Rik	0	NA	NA	NA	NA	NA
1700025F22Rik	0	NA	NA	NA	NA	NA
1700025F24Rik	4.04661	0.364166	0.767009	0.474787	0.634939	NA
1700025G04Rik	797.362	0.0630773	0.0716844	0.87993	0.378897	0.6718
1700025J12Rik	0.11439	0.512277	3.79876	0.134854	0.892728	NA
1700025K24Rik	0	NA	NA	NA	NA	NA
1700025M24Rik	0.15413	1.08045	3.79795	0.284483	0.77604	NA
1700025N23Rik	0.892579	-0.146608	1.64766	-0.0889795	0.929098	NA
1700026D08Rik	393.281	-0.0180093	0.132312	-0.136112	0.891732	0.959214
1700026D11Rik	0	NA	NA	NA	NA	NA
1700026F02Rik	0	NA	NA	NA	NA	NA
1700026J14Rik	7.09266	1.15899	0.580626	1.99611	0.0459225	0.217544
1700026L06Rik	34.5688	0.0966644	0.291076	0.332093	0.739819	0.895817
1700027A15Rik	0.10194	-0.0648009	3.79876	-0.0170584	0.98639	NA
1700027F06Rik	0	NA	NA	NA	NA	NA
1700027F09Rik	0.178523	-1.02659	3.79876	-0.270243	0.786973	NA
1700027H10Rik	0	NA	NA	NA	NA	NA
1700027I24Rik	0.257803	1.64778	3.77908	0.436027	0.662817	NA
1700027J07Rik	0.920809	-2.24853	2.25991	-0.994965	0.319753	NA
1700028B04Rik	0.240742	1.57391	3.54706	0.443722	0.657243	NA
1700028D13Rik	0	NA	NA	NA	NA	NA
1700028E10Rik	78.4573	0.889809	0.217596	4.08926	4.32744e-05	0.000939269
1700028I16Rik	27.0686	-0.160994	0.317845	-0.506518	0.612493	0.832454
1700028J19Rik	30.9703	1.40608	0.357758	3.93025	8.4858e-05	0.00165458
1700028K03Rik	378.302	0.463757	0.134575	3.44608	0.000568789	0.00799205
1700028M03Rik	0	NA	NA	NA	NA	NA
1700028P14Rik	0.679751	1.42	1.86972	0.759473	0.44757	NA
1700028P15Rik	0.621886	-0.449518	2.21576	-0.202873	0.839234	NA
1700029B22Rik	0	NA	NA	NA	NA	NA
1700029F12Rik	1.43905	-0.249802	1.25305	-0.199355	0.841985	NA
1700029H14Rik	0.549565	-1.25221	2.22611	-0.562511	0.573768	NA
1700029I15Rik	8.97646	0.951225	0.613644	1.55012	0.121112	0.388883
1700029J03Rik	0.0681962	0.512277	3.79876	0.134854	0.892728	NA
1700029J07Rik	290.95	0.262017	0.177267	1.47809	0.139384	0.419672
1700029M20Rik	20.021	-0.480643	0.360334	-1.33388	0.182243	0.479249
1700029N11Rik	0.0847751	0.512277	3.79876	0.134854	0.892728	NA
1700029P11Rik	34.2642	0.588789	0.351072	1.67712	0.0935192	0.338079
1700030A11Rik	0.0859343	0.512277	3.79876	0.134854	0.892728	NA
1700030C10Rik	299.928	0.687185	0.15406	4.46051	8.17646e-06	0.000221541
1700030F04Rik	0.0847751	0.512277	3.79876	0.134854	0.892728	NA
1700030F18Rik	1.81184	-0.220768	1.18721	-0.185955	0.85248	NA
1700030J22Rik	98.68	0.308705	0.195834	1.57636	0.114942	0.37704
1700030K09Rik	500.415	0.475816	0.103583	4.59357	4.35728e-06	0.000126268
1700030L20Rik	0	NA	NA	NA	NA	NA
1700030M09Rik	0.992264	0.737135	1.75207	0.420722	0.673958	NA
1700030N03Rik	0	NA	NA	NA	NA	NA
1700030O20Rik	0.111355	-0.0648009	3.79876	-0.0170584	0.98639	NA
1700031A10Rik	0.212223	-2.17943	3.73184	-0.584009	0.559214	NA
1700031F05Rik	6.76206	3.41936	0.853252	4.00744	6.13812e-05	NA
1700031M16Rik	0	NA	NA	NA	NA	NA
1700031P21Rik	0.11439	0.512277	3.79876	0.134854	0.892728	NA
1700034E13Rik	0	NA	NA	NA	NA	NA
1700034G24Rik	0	NA	NA	NA	NA	NA
1700034H15Rik	54.4986	0.601799	0.199309	3.01943	0.00253247	0.026944
1700034I23Rik	5.70087	1.1114	0.673532	1.65011	0.0989214	NA
1700034J05Rik	0.250292	-0.449514	3.53109	-0.127302	0.898702	NA
1700034K08Rik	0	NA	NA	NA	NA	NA
1700034O15Rik	0.824272	1.15777	2.00115	0.578553	0.562891	NA
1700034P13Rik	5.07099	0.65272	0.693739	0.940872	0.346771	NA
1700036G14Rik	0	NA	NA	NA	NA	NA
1700037C18Rik	114.337	0.532976	0.180311	2.95588	0.00311781	0.0317218
1700037H04Rik	1321.22	0.0229343	0.0815227	0.281324	0.778462	0.912522
1700039E15Rik	0.38719	0.13787	2.71851	0.0507152	0.959552	NA
1700039E22Rik	0.236944	1.08061	3.59173	0.30086	0.763521	NA
1700040L02Rik	30.2485	-0.0446163	0.307171	-0.145249	0.884514	0.956497
1700041A01Rik	0.266871	-0.449514	3.46086	-0.129885	0.896657	NA
1700041C23Rik	0	NA	NA	NA	NA	NA
1700041M19Rik	0	NA	NA	NA	NA	NA
1700042G07Rik	2.11533	1.76114	1.3741	1.28166	0.199962	NA
1700042G15Rik	0.0847751	0.512277	3.79876	0.134854	0.892728	NA
1700042O10Rik	3.51345	-0.321815	0.752858	-0.427458	0.669046	NA
1700044C05Rik	1.13807	0.108002	1.29617	0.0833239	0.933594	NA
1700044K03Rik	0	NA	NA	NA	NA	NA
1700045H11Rik	0.591945	-0.184903	1.9014	-0.0972458	0.922531	NA
1700046C09Rik	0.10194	-0.0648009	3.79876	-0.0170584	0.98639	NA
1700047A11Rik	0.532104	-1.94018	1.97343	-0.98315	0.325534	NA
1700047E10Rik	0.939082	0.134109	2.04752	0.0654982	0.947777	NA
1700047G03Rik	0.070741	-1.02659	3.79876	-0.270242	0.786974	NA
1700047I17Rik2	0	NA	NA	NA	NA	NA
1700047L14Rik	0.357862	0.708715	3.77799	0.18759	0.851198	NA
1700047M11Rik	0.948637	0.0753132	1.92627	0.0390979	0.968812	NA
1700048M11Rik	12.6642	-0.307457	0.430412	-0.714332	0.475022	0.745408
1700048O20Rik	306.625	0.585438	0.138503	4.22691	2.36926e-05	0.000556605
1700049E15Rik	0	NA	NA	NA	NA	NA
1700049E22Rik	0.250782	1.53859	3.78452	0.406547	0.68434	NA
1700049G17Rik	423.328	-0.119845	0.139605	-0.858456	0.390641	0.680597
1700049L16Rik	1.58608	-0.00807134	1.33579	-0.00604239	0.995179	NA
1700051A21Rik	0.187874	0.512274	3.79876	0.134853	0.892728	NA
1700052I22Rik	0.39298	-1.97326	3.69628	-0.533851	0.593445	NA
1700052K11Rik	269.346	0.417302	0.116983	3.5672	0.000360817	0.00548206
1700054A03Rik	0.69187	0.357719	1.97415	0.181201	0.856209	NA
1700054K19Rik	0	NA	NA	NA	NA	NA
1700054M17Rik	0.156675	-0.449511	3.79876	-0.118331	0.905806	NA
1700055C04Rik	0	NA	NA	NA	NA	NA
1700056E22Rik	17.8903	0.100878	0.344738	0.292623	0.76981	0.909141
1700057G04Rik	0.203879	-0.0648043	3.79876	-0.0170593	0.986389	NA
1700057H15Rik	0	NA	NA	NA	NA	NA
1700057H21Rik	0.305819	-0.0648064	3.79876	-0.0170599	0.986389	NA
1700060C16Rik	0	NA	NA	NA	NA	NA
1700060C20Rik	0.768428	0.133725	2.00159	0.0668093	0.946734	NA
1700061F12Rik	0.0839723	-0.0648009	3.79876	-0.0170584	0.98639	NA
1700061G19Rik	90.1895	-0.848873	0.271759	-3.12362	0.00178639	0.0202237
1700061I17Rik	0.254911	1.08068	3.51	0.307886	0.758169	NA
1700061J23Rik	0.0859343	0.512277	3.79876	0.134854	0.892728	NA
1700063A18Rik	0	NA	NA	NA	NA	NA
1700063D05Rik	0.543742	-1.29101	2.15956	-0.597813	0.549965	NA
1700063O14Rik	0	NA	NA	NA	NA	NA
1700064J06Rik	0	NA	NA	NA	NA	NA
1700064M15Rik	0.730733	-2.54364	2.05872	-1.23555	0.216627	NA
1700065D16Rik	3.42305	1.29688	0.927379	1.39843	0.161984	NA
1700065I16Rik	0.695103	-0.16656	2.02129	-0.0824028	0.934326	NA
1700065J11Rik	0.0945505	-1.02659	3.79876	-0.270242	0.786974	NA
1700065J18Rik	0.726306	-0.806095	1.98206	-0.406695	0.684232	NA
1700065L07Rik	0	NA	NA	NA	NA	NA
1700065O20Rik	0.264101	0.140449	3.79763	0.0369833	0.970498	NA
1700066B17Rik	3.64478	-0.157197	0.860998	-0.182575	0.855132	NA
1700066B19Rik	16.9232	0.371123	0.420041	0.88354	0.376944	0.670314
1700066J03Rik	1.38542	-0.573619	1.28399	-0.446748	0.655057	NA
1700066M21Rik	441.62	-0.0278692	0.0923577	-0.301753	0.76284	0.907077
1700066N21Rik	0	NA	NA	NA	NA	NA
1700066O22Rik	1.33783	1.60193	1.79279	0.893537	0.37157	NA
1700067G17Rik	0	NA	NA	NA	NA	NA
1700067K01Rik	36.9057	-0.472037	0.248464	-1.89982	0.0574564	0.252793
1700067P10Rik	0.484298	-1.62373	2.94415	-0.551512	0.581282	NA
1700069L16Rik	0.250067	-1.22844	3.48443	-0.352551	0.724425	NA
1700069P05Rik	0	NA	NA	NA	NA	NA
1700071K01Rik	47.4385	-0.0839129	0.240054	-0.349559	0.72667	0.888947
1700071M16Rik	4.60353	-0.323758	0.70171	-0.461385	0.644523	NA
1700072B07Rik	0	NA	NA	NA	NA	NA
1700072I22Rik	0.156675	-0.449511	3.79876	-0.118331	0.905806	NA
1700072O05Rik	0	NA	NA	NA	NA	NA
1700073E17Rik	7.01561	0.849381	0.602026	1.41087	0.158282	0.446364
1700074H08Rik	0	NA	NA	NA	NA	NA
1700074P13Rik	0	NA	NA	NA	NA	NA
1700080E11Rik	0	NA	NA	NA	NA	NA
1700080N15Rik	0.111355	-0.0648009	3.79876	-0.0170584	0.98639	NA
1700080O16Rik	15.1846	0.395058	0.465104	0.849397	0.39566	0.684063
1700081H04Rik	0.236033	-2.31571	3.72119	-0.622304	0.533742	NA
1700084C01Rik	2.20613	-0.315339	1.14072	-0.276438	0.782212	NA
1700084D21Rik	0	NA	NA	NA	NA	NA
1700084E18Rik	15.7754	0.253299	0.420831	0.601902	0.547239	0.794682
1700084F23Rik	0.154713	-1.02659	3.79876	-0.270243	0.786973	NA
1700084J12Rik	86.7831	-0.158178	0.164576	-0.961127	0.336488	0.637442
1700084M14Rik	0.225744	0.512274	3.79876	0.134853	0.892728	NA
1700085C21Rik	0.170136	0.512274	3.79876	0.134853	0.892728	NA
1700086L19Rik	0.423658	1.56921	2.66647	0.588498	0.556198	NA
1700086O06Rik	150.557	0.0476222	0.163084	0.29201	0.770279	0.909363
1700088E04Rik	16.6531	-0.440543	0.362796	-1.2143	0.224633	0.528447
1700091H14Rik	0.0945505	-1.02659	3.79876	-0.270242	0.786974	NA
1700092C02Rik	0	NA	NA	NA	NA	NA
1700092C10Rik	0.112704	-1.02659	3.79876	-0.270242	0.786974	NA
1700092E19Rik	0.070741	-1.02659	3.79876	-0.270242	0.786974	NA
1700092K14Rik	2.19142	-0.168708	1.07974	-0.156249	0.875837	NA
1700092M07Rik	8.10366	0.633139	0.610978	1.03627	0.300076	0.605929
1700093K21Rik	4.4895	0.638949	0.802699	0.796001	0.426031	NA
1700094D03Rik	249.55	-0.066607	0.169469	-0.393033	0.694295	0.872022
1700094J05Rik	0.656327	1.1602	2.045	0.567338	0.570485	NA
1700094M24Rik	0.0877705	0.512277	3.79876	0.134854	0.892728	NA
1700095A21Rik	1.28878	-0.140025	1.72799	-0.0810336	0.935415	NA
1700095B10Rik	0	NA	NA	NA	NA	NA
1700095J12Rik	0.0681962	0.512277	3.79876	0.134854	0.892728	NA
1700096J18Rik	1.35762	-1.49335	1.63423	-0.913795	0.360824	NA
1700096K18Rik	126.393	-0.323864	0.17421	-1.85904	0.0630221	0.267688
1700096P03Rik	0.171869	1.10224	3.79763	0.290243	0.77163	NA
1700097N02Rik	29.0192	-0.503092	0.443461	-1.13447	0.256599	0.563112
1700099I09Rik	5.36392	1.17585	0.750062	1.56767	0.116959	NA
1700100I10Rik	66.1224	-0.102512	0.237689	-0.431288	0.666259	0.858475
1700100L14Rik	0	NA	NA	NA	NA	NA
1700101E01Rik	13.8909	-0.2509	0.460453	-0.544897	0.585824	0.816578
1700101I11Rik	4.21338	-1.2613	0.749749	-1.6823	0.0925113	NA
1700101O22Rik	0	NA	NA	NA	NA	NA
1700102H20Rik	9.99085	0.0165651	0.546184	0.0303287	0.975805	0.991071
1700102P08Rik	19.1912	-0.28446	0.391009	-0.727502	0.466919	0.738657
1700104L18Rik	0	NA	NA	NA	NA	NA
1700105P06Rik	5.69162	-0.341545	0.700856	-0.487325	0.626028	NA
1700106J16Rik	475.301	-0.12603	0.185405	-0.679752	0.496661	0.760198
1700108F19Rik	16.1162	-0.0924979	0.409276	-0.226003	0.821199	0.928389
1700108J01Rik	0	NA	NA	NA	NA	NA
1700109G14Rik	0.336417	-0.774877	2.76353	-0.280394	0.779175	NA
1700109G15Rik	0.383391	-0.449517	2.7209	-0.165209	0.86878	NA
1700109H08Rik	11.3767	0.173064	0.487048	0.355332	0.722341	0.887142
1700109I08Rik	0	NA	NA	NA	NA	NA
1700109K24Rik	12.2943	-0.196571	0.675861	-0.290845	0.77117	0.909389
1700110C19Rik	8.55826	-0.355567	0.502571	-0.707496	0.479259	0.747775
1700110I01Rik	3.02721	-0.302871	1.11945	-0.270552	0.786735	NA
1700110I07Rik	1.3708	0.704351	1.34148	0.525056	0.599544	NA
1700110K17Rik	0.0877705	0.512277	3.79876	0.134854	0.892728	NA
1700111N16Rik	0.175541	1.10224	3.79763	0.290243	0.77163	NA
1700112E06Rik	6.26823	-0.0864622	0.597078	-0.144809	0.884862	NA
1700112H15Rik	2.17812	-0.0727665	0.994669	-0.0731565	0.941682	NA
1700112J05Rik	0.893628	-0.000321356	1.82898	-0.000175702	0.99986	NA
1700112J16Rik	7.99998	-0.702126	0.607798	-1.1552	0.24801	0.554146
1700113A16Rik	277.562	-0.126159	0.137916	-0.914753	0.360321	0.657509
1700113B09Rik	0.787927	-0.799962	1.62165	-0.493302	0.621799	NA
1700113H08Rik	0.523418	0.314629	2.21176	0.142253	0.88688	NA
1700116B05Rik	0	NA	NA	NA	NA	NA
1700119H24Rik	1.8215	0.00560086	1.28212	0.00436844	0.996514	NA
1700120C14Rik	14.9485	0.0466651	0.419656	0.111199	0.911459	0.967711
1700120E14Rik	0.982516	-0.422097	1.6928	-0.249349	0.803091	NA
1700120G07Rik	0	NA	NA	NA	NA	NA
1700120K04Rik	10.3775	-0.275587	0.482864	-0.570734	0.56818	0.806976
1700121L16Rik	0	NA	NA	NA	NA	NA
1700121N20Rik	1.66496	-3.45934	1.52723	-2.26511	0.0235059	NA
1700122C19Rik	0	NA	NA	NA	NA	NA
1700122O11Rik	0.0847751	0.512277	3.79876	0.134854	0.892728	NA
1700123I01Rik	355.107	4.81896	0.371297	12.9787	1.61499e-38	3.28187e-35
1700123J17Rik	2.18897	-1.46823	1.23784	-1.18612	0.235575	NA
1700123K08Rik	0.20894	-0.449511	3.79876	-0.118331	0.905806	NA
1700123L14Rik	0.310519	1.10137	3.31057	0.332681	0.739375	NA
1700123M08Rik	24.7781	-0.175286	0.302082	-0.580261	0.561739	0.802618
1700123O12Rik	0	NA	NA	NA	NA	NA
1700123O20Rik	1023.75	-0.0698287	0.0917649	-0.760951	0.446686	0.722925
1700123O21Rik	0.326676	1.98302	2.75582	0.719574	0.471788	NA
1700124L16Rik	6.19484	-0.110313	0.679274	-0.162398	0.870992	NA
1700125G02Rik	0	NA	NA	NA	NA	NA
1700125G22Rik	3.10036	0.996106	0.961071	1.03645	0.29999	NA
1700125H03Rik	2.78301	0.370228	0.911583	0.406138	0.684642	NA
1700125H20Rik	5.47389	1.1316	0.728617	1.55308	0.120404	NA
1700126H18Rik	0.0945505	-1.02659	3.79876	-0.270242	0.786974	NA
1700128A07Rik	0.480937	-1.47292	2.28048	-0.645882	0.518356	NA
1700128F08Rik	0.282611	-0.449514	3.40376	-0.132064	0.894934	NA
1700129C05Rik	0	NA	NA	NA	NA	NA
1810006J02Rik	6.91889	-0.0210323	0.719595	-0.029228	0.976683	0.991481
1810007C17Rik	0	NA	NA	NA	NA	NA
1810007D17Rik	0.400799	0.777714	2.69586	0.288485	0.772976	NA
1810008I18Rik	1.30792	-0.520855	1.55816	-0.334276	0.738171	NA
1810009A15Rik	92.5787	-0.20731	0.244692	-0.847229	0.396868	0.684695
1810009J06Rik	0.0847751	0.512277	3.79876	0.134854	0.892728	NA
1810010D01Rik	28.2607	0.108226	0.289168	0.374268	0.708205	0.879249
1810010H24Rik	41.6852	-0.202293	0.244909	-0.825993	0.408808	0.693374
1810011H11Rik	12.2554	-0.0272991	0.54834	-0.049785	0.960294	0.984518
1810011O10Rik	453.757	-0.0108712	0.0897448	-0.121135	0.903584	0.964773
1810012K16Rik	8.00487	-0.276079	0.524016	-0.526852	0.598297	0.824909
1810013A23Rik	0.168747	0.512274	3.79876	0.134853	0.892728	NA
1810013L24Rik	1427.01	0.21529	0.0789941	2.7254	0.00642238	0.0551551
1810014B01Rik	274.688	-0.0629153	0.101645	-0.618969	0.535937	0.787791
1810018F18Rik	0	NA	NA	NA	NA	NA
1810019D21Rik	76.8087	0.10106	0.21223	0.47618	0.633946	0.841586
1810020O05Rik	10.2192	-0.116792	0.466087	-0.250581	0.802138	0.920829
1810021B22Rik	24.924	0.285504	0.304858	0.936515	0.349008	0.647697
1810022K09Rik	754.554	-0.282144	0.110038	-2.56407	0.0103452	0.0789589
1810024B03Rik	17.2803	0.122166	0.342904	0.356269	0.721639	0.886815
1810026B05Rik	721.938	-0.0413429	0.0929157	-0.444951	0.656355	0.853561
1810026J23Rik	1481.73	0.481767	0.103921	4.63589	3.55407e-06	0.000105628
1810030O07Rik	1564.74	-0.0114764	0.1079	-0.106362	0.915295	0.969361
1810032O08Rik	415.551	0.0282566	0.109816	0.257308	0.796941	0.918527
1810034E14Rik	60.6776	0.337606	0.207721	1.62528	0.104102	0.356818
1810037I17Rik	928.69	0.0181012	0.104604	0.173046	0.862615	0.947408
1810041H14Rik	12.3335	0.594336	0.431229	1.37824	0.16813	0.460306
1810041L15Rik	129.624	-0.125856	0.22403	-0.56178	0.574266	0.810928
1810043G02Rik	481.059	0.392299	0.110392	3.55369	0.000379871	0.00571283
1810043H04Rik	384.008	-0.0248963	0.124399	-0.200132	0.841377	0.936996
1810044D09Rik	67.8673	-0.0197498	0.242579	-0.0814159	0.935111	0.976311
1810046K07Rik	0.11439	0.512277	3.79876	0.134854	0.892728	NA
1810053B23Rik	1.61527	-0.61914	1.66116	-0.372716	0.70936	NA
1810055G02Rik	620.82	0.0715838	0.106989	0.669078	0.503445	0.76397
1810058I24Rik	1559.3	-0.236007	0.102971	-2.29198	0.021907	0.133291
1810062G17Rik	21.0968	0.0249145	0.326257	0.0763646	0.939129	0.978152
1810062O18Rik	10.1183	-0.545888	0.46674	-1.16958	0.242172	0.547991
1810063I02Rik	12.0822	-0.189056	0.474178	-0.398702	0.690112	0.869587
1810064F22Rik	140.19	0.1556	0.179849	0.86517	0.386945	0.678229
1810065E05Rik	5.86773	0.059374	0.679644	0.0873604	0.930385	NA
2010001A14Rik	45.6795	0.31076	0.234324	1.3262	0.184774	0.482239
2010001E11Rik	57.3266	-0.281199	0.281861	-0.997652	0.318448	0.621415
2010003K11Rik	3.60361	0.859742	0.885077	0.971375	0.331361	NA
2010005H15Rik	37.9278	2.42883	1.41665	1.71449	0.0864385	0.322671
2010009K17Rik	12.2772	-0.622367	0.440534	-1.41276	0.157727	0.445711
2010010A06Rik	29.609	0.277185	0.296986	0.933327	0.350651	0.648968
2010012O05Rik	463.144	0.294624	0.0808952	3.64204	0.000270482	0.00431524
2010016I18Rik	1.641	0.132091	1.19559	0.110482	0.912027	NA
2010106C02Rik	0.248681	0.118869	3.53739	0.0336035	0.973193	NA
2010106E10Rik	0	NA	NA	NA	NA	NA
2010107E04Rik	1512.59	0.166977	0.0898961	1.85745	0.0632475	0.26823
2010107G12Rik	25.4369	0.303167	0.334785	0.905557	0.365171	0.661309
2010107G23Rik	97.475	-0.234761	0.20447	-1.14814	0.250911	0.557096
2010109A12Rik	10.3506	0.564355	0.511703	1.1029	0.270072	0.576038
2010109I03Rik	3.05393	1.1886	0.956372	1.24282	0.213934	NA
2010111I01Rik	964.826	0.0541266	0.0760367	0.711849	0.476559	0.746427
2010204K13Rik	262.98	-0.289184	0.119327	-2.42346	0.0153735	0.103963
2010300C02Rik	118.844	-0.473452	0.227817	-2.07822	0.0376894	0.192678
2010308F09Rik	3.42851	-0.077884	0.88406	-0.0880981	0.929799	NA
2010310C07Rik	0.224872	0.118774	3.65237	0.0325197	0.974058	NA
2010315B03Rik	551.191	-0.0116613	0.10119	-0.115241	0.908254	0.96649
2010320M18Rik	341.48	0.016095	0.141754	0.113541	0.909601	0.966829
2200002D01Rik	36.5201	-0.164791	0.297541	-0.553843	0.579686	0.814341
2200002J24Rik	63.8848	-0.175885	0.204846	-0.858621	0.39055	0.680513
2210010C04Rik	0.40095	-1.03073	3.67535	-0.280444	0.779137	NA
2210011C24Rik	25.7251	0.0292154	0.378365	0.0772149	0.938453	0.977976
2210013O21Rik	617.697	-0.16528	0.10185	-1.62277	0.104638	0.357674
2210015D19Rik	189.982	-0.0610986	0.137868	-0.443166	0.657646	0.854106
2210016F16Rik	1068.45	-0.0424786	0.0675929	-0.628448	0.529711	0.783887
2210016L21Rik	701.96	-0.124698	0.0979288	-1.27335	0.202893	0.504502
2210018M11Rik	945.091	0.375087	0.152502	2.45955	0.0139111	0.097312
2210019I11Rik	0.224059	-1.02659	3.79876	-0.270243	0.786973	NA
2210039B01Rik	0.794105	0.596511	1.68691	0.353612	0.72363	NA
2210404E10Rik	0.290905	0.51227	3.79876	0.134852	0.892729	NA
2210404O09Rik	293.28	0.00836738	0.135204	0.0618869	0.950653	0.981508
2210406O10Rik	31.382	0.508707	0.321161	1.58397	0.113202	0.373745
2210407C18Rik	1.55237	-0.778384	1.51482	-0.513846	0.60736	NA
2210408F21Rik	0.580863	-0.362459	1.87905	-0.192896	0.847041	NA
2210408I21Rik	175.708	-0.225115	0.165627	-1.35916	0.174095	0.469129
2210409D07Rik	0.10194	-0.0648009	3.79876	-0.0170584	0.98639	NA
2210409E12Rik	22.056	0.217517	0.377595	0.576058	0.564576	0.80448
2210414B05Rik	0	NA	NA	NA	NA	NA
2210416O15Rik	21.9833	0.117478	0.353492	0.332334	0.739637	0.895663
2210417A02Rik	10.3377	-0.0772212	0.490494	-0.157435	0.874902	0.95233
2210420H20Rik	0.400522	1.86762	3.14205	0.594395	0.552248	NA
2300002M23Rik	2.21712	-0.628904	0.976354	-0.644135	0.519488	NA
2300003K06Rik	0	NA	NA	NA	NA	NA
2300005B03Rik	0.170709	1.10224	3.79763	0.290243	0.77163	NA
2300009A05Rik	183.939	-0.0215418	0.150268	-0.143356	0.886009	0.956843
2310001H17Rik	5.93404	-1.20774	0.693726	-1.74095	0.0816926	NA
2310001K24Rik	0.632495	1.99234	2.2428	0.888324	0.374366	NA
2310002D06Rik	0.996828	0.988907	1.66855	0.592675	0.553399	NA
2310002F09Rik	5.20921	-0.180642	0.708831	-0.254845	0.798843	NA
2310002L09Rik	0.799697	2.08026	2.31561	0.89836	0.368993	NA
2310003N18Rik	0.280905	1.10223	3.79763	0.290242	0.771631	NA
2310005A03Rik	0.917701	-0.266784	1.42612	-0.18707	0.851605	NA
2310005E17Rik	0	NA	NA	NA	NA	NA
2310007B03Rik	17.0574	-0.57064	0.422271	-1.35136	0.17658	0.47246
2310008N11Rik	3.4421	-0.0752458	0.840485	-0.0895266	0.928663	NA
2310009A05Rik	248.486	-0.0619891	0.116933	-0.530125	0.596025	0.823197
2310009B15Rik	349.482	-0.181117	0.101135	-1.79085	0.0733181	0.293877
2310010G23Rik	78.2599	0.106461	0.198952	0.535107	0.592576	0.820913
2310010J17Rik	89.7147	0.352293	0.179339	1.9644	0.0494837	0.228369
2310011J03Rik	640.79	-0.0835011	0.119722	-0.697461	0.485514	0.751776
2310015A10Rik	674.745	-0.113261	0.0961928	-1.17744	0.23902	0.544451
2310015D24Rik	0.0847751	0.512277	3.79876	0.134854	0.892728	NA
2310016D03Rik	0	NA	NA	NA	NA	NA
2310020H05Rik	0.179551	0.512274	3.79876	0.134853	0.892728	NA
2310022A10Rik	581.775	0.0403014	0.0849233	0.474562	0.635099	0.842085
2310022B05Rik	1536.65	-0.148376	0.0988234	-1.50143	0.133245	0.409648
2310030A07Rik	0.641376	2.00567	2.48939	0.805686	0.420424	NA
2310030G06Rik	208.264	-0.476536	0.135018	-3.52941	0.000416485	0.0061721
2310033P09Rik	655.649	-0.0309665	0.0823589	-0.375994	0.706921	0.879037
2310034C09Rik	0	NA	NA	NA	NA	NA
2310034G01Rik	55.5566	-0.238239	0.234657	-1.01527	0.309979	0.614401
2310034O05Rik	1.06899	-1.25526	1.56169	-0.803782	0.421523	NA
2310035C23Rik	1238.09	0.573294	0.123719	4.63384	3.5895e-06	0.000106486
2310036O22Rik	2102.67	-0.107845	0.0814654	-1.32382	0.185564	0.483448
2310039H08Rik	417.095	-0.13939	0.136076	-1.02435	0.305668	0.610831
2310039L15Rik	2.09202	0.195442	1.17846	0.165845	0.868279	NA
2310040G24Rik	42.8594	-0.492793	0.261684	-1.88316	0.0596784	0.259271
2310043L19Rik	4.20765	0.472085	0.746496	0.632401	0.527125	NA
2310043O21Rik	0.070741	-1.02659	3.79876	-0.270242	0.786974	NA
2310045N01Rik	719.95	-0.0494235	0.104007	-0.475195	0.634648	0.841776
2310045n01rik-mef2b	0	NA	NA	NA	NA	NA
2310047M10Rik	274.296	-0.0943215	0.141838	-0.664994	0.506054	0.765617
2310050C09Rik	0.199125	0.512274	3.79876	0.134853	0.892728	NA
2310057J18Rik	0	NA	NA	NA	NA	NA
2310057M21Rik	441.132	0.0692152	0.113471	0.609979	0.541876	0.791845
2310057N15Rik	0	NA	NA	NA	NA	NA
2310061I04Rik	1044.59	0.714856	0.140097	5.10259	3.3503e-07	1.28761e-05
2310061N02Rik	0	NA	NA	NA	NA	NA
2310065F04Rik	0.205905	-1.02659	3.79876	-0.270243	0.786973	NA
2310067B10Rik	1414.08	0.348798	0.0585565	5.9566	2.57532e-09	1.57395e-07
2310068J16Rik	44.0067	0.259723	0.282449	0.91954	0.357813	0.655626
2310069B03Rik	3.55142	0.398907	0.798174	0.499775	0.617234	NA
2310069G16Rik	1.62599	0.481879	1.16103	0.415043	0.67811	NA
2310075C17Rik	0	NA	NA	NA	NA	NA
2310079G19Rik	0	NA	NA	NA	NA	NA
2310081J21Rik	2.91295	-0.628104	1.01012	-0.621809	0.534068	NA
2400006E01Rik	3.30856	0.907183	1.08674	0.834776	0.403844	NA
2410002F23Rik	2894.03	0.0680068	0.0716248	0.949487	0.342373	0.642556
2410003L11Rik	30.6032	-1.04645	0.318562	-3.2849	0.00102018	0.0129167
2410004B18Rik	472.57	-0.212036	0.0856091	-2.47679	0.013257	0.0941546
2410004I01Rik	10.7218	-0.263704	0.44514	-0.592406	0.553579	0.799461
2410004P03Rik	10.8485	-0.444812	0.532379	-0.835517	0.403426	0.689843
2410006H16Rik	655.454	-0.0828666	0.152423	-0.543661	0.586675	0.817183
2410012E07Rik	34.2719	-0.533716	0.313024	-1.70503	0.0881888	0.326906
2410015M20Rik	1295.77	-0.0999972	0.103243	-0.968559	0.332765	0.634354
2410016O06Rik	670.899	-0.209978	0.0963162	-2.18009	0.029251	0.163245
2410017I17Rik	15.4661	-0.21563	0.584895	-0.368664	0.712378	0.8809
2410018L13Rik	238.014	-0.0698376	0.115168	-0.606395	0.544252	0.793295
2410021H03Rik	3.19318	-1.62377	1.23231	-1.31766	0.187616	NA
2410089E03Rik	1377.04	0.5208	0.118813	4.38337	1.16855e-05	0.000302986
2410124H12Rik	3.01147	-0.340055	0.952426	-0.357041	0.721061	NA
2410127L17Rik	1374.62	-0.128757	0.0926347	-1.38994	0.164548	0.455725
2410131K14Rik	246.235	0.00806601	0.123028	0.0655626	0.947726	0.9806
2410137M14Rik	2.62938	1.24433	1.0519	1.18293	0.236837	NA
2410141K09Rik	47.074	-0.290727	0.313635	-0.92696	0.353947	0.652025
2500002B13Rik	57.0178	-0.0456972	0.265349	-0.172216	0.863268	0.947828
2500004C02Rik	837.717	0.0416239	0.097854	0.425367	0.670569	0.860957
2510002D24Rik	359.574	-0.135446	0.0918222	-1.47509	0.140189	0.42098
2510003B16Rik	17.0478	0.270835	0.400771	0.675783	0.499178	0.761413
2510009E07Rik	868.308	-0.121561	0.0826523	-1.47075	0.141358	0.422355
2510039O18Rik	1394.64	0.144097	0.0899767	1.60149	0.109268	0.367095
2610001J05Rik	750.724	-0.104639	0.0916917	-1.1412	0.253785	0.559818
2610002M06Rik	604.489	-0.161579	0.0923278	-1.75005	0.0801089	0.309416
2610005L07Rik	1641.09	-0.402843	0.281021	-1.4335	0.151716	0.438547
2610008E11Rik	1822.69	-0.134292	0.0841043	-1.59674	0.110325	0.36895
2610015P09Rik	472.751	0.352427	0.127503	2.76407	0.00570859	0.0507683
2610016A17Rik	0.19748	-0.449511	3.79876	-0.118331	0.905806	NA
2610020C07Rik	189.905	0.153253	0.115968	1.32152	0.186329	0.484586
2610020H08Rik	483.149	0.551494	0.148767	3.70709	0.000209653	0.00353561
2610027K06Rik	58.1962	-0.166042	0.207215	-0.801301	0.422958	0.704192
2610028E06Rik	541.92	-0.132592	0.0882657	-1.50219	0.133048	0.4093
2610028H24Rik	0.247522	0.118864	3.5426	0.0335528	0.973234	NA
2610035D17Rik	245.5	-0.0549243	0.125949	-0.436082	0.662777	0.857249
2610035F20Rik	4.4242	-0.764213	0.717792	-1.06467	0.287024	NA
2610037D02Rik	12.0756	-0.523212	0.539832	-0.969213	0.332439	0.634239
2610042L04Rik	19.1015	0.215502	0.340667	0.632587	0.527003	0.78153
2610044O15Rik8	380.44	-0.0974288	0.113632	-0.857407	0.39122	0.681244
2610100L16Rik	9.866	0.643152	0.512776	1.25426	0.209749	0.512086
2610203C22Rik	8.29182	-0.214442	0.520305	-0.412146	0.680232	0.866041
2610206C17Rik	25.3007	-0.0360172	0.306069	-0.117677	0.906324	0.965728
2610301B20Rik	799.059	0.0493204	0.0734051	0.671894	0.501651	0.762681
2610305D13Rik	856.206	-0.192733	0.152429	-1.26442	0.206081	0.508018
2610306M01Rik	166.442	0.209682	0.143969	1.45644	0.145271	0.428683
2610307P16Rik	62.1969	-0.457146	0.225992	-2.02284	0.0430898	0.209674
2610316D01Rik	11.6919	-0.0179057	0.45499	-0.039354	0.968608	0.988251
2610318N02Rik	172.287	0.00731119	0.150824	0.048475	0.961338	0.984953
2610507B11Rik	4616.68	-0.0297922	0.0985377	-0.302343	0.762391	0.906831
2610507I01Rik	1266.01	-0.0243836	0.0804394	-0.30313	0.761791	0.906421
2610524H06Rik	522.647	-0.0590054	0.119326	-0.494491	0.62096	0.836158
2610528A11Rik	1.60605	-0.601449	1.16763	-0.515101	0.606482	NA
2610528J11Rik	3.64578	-1.21415	0.919918	-1.31985	0.186886	NA
2700029M09Rik	1045.97	0.0225165	0.0952947	0.236283	0.813213	0.925604
2700038G22Rik	297.918	-0.167863	0.112657	-1.49003	0.136216	0.414695
2700046A07Rik	31.2597	-0.0996939	0.341874	-0.29161	0.770585	0.909363
2700046G09Rik	235.618	-0.136613	0.139986	-0.975902	0.329113	0.630496
2700049A03Rik	655.242	-0.0903941	0.105111	-0.859985	0.389797	0.680247
2700054A10Rik	42.3791	-0.523823	0.253925	-2.0629	0.0391218	0.197885
2700060E02Rik	4774.2	0.20745	0.06669	3.11067	0.00186665	0.0209139
2700062C07Rik	488.111	-0.125723	0.101939	-1.23332	0.217456	0.520505
2700069I18Rik	3.28606	-0.105031	0.908483	-0.115611	0.907961	NA
2700070H01Rik	11.1669	-0.804296	0.468957	-1.71507	0.0863316	0.322671
2700081O15Rik	3819.89	-0.115582	0.0729978	-1.58337	0.113338	0.373963
2700089I24Rik	5.73766	-0.251101	0.586925	-0.427825	0.668779	NA
2700094K13Rik	2710.49	-0.0387485	0.0839187	-0.461738	0.644269	0.846716
2700097O09Rik	357.947	-0.078279	0.100518	-0.778752	0.436126	0.715113
2700099C18Rik	380.684	0.175597	0.105864	1.65871	0.0971744	0.345096
2810001G20Rik	799.479	0.0318346	0.101529	0.313551	0.753862	0.901441
2810002D19Rik	190.65	-0.102861	0.141908	-0.724841	0.46855	0.739607
2810004N23Rik	1393.28	-0.108395	0.0710233	-1.52618	0.126964	0.399655
2810006K23Rik	508.453	0.139065	0.103091	1.34896	0.177351	0.47297
2810013P06Rik	500.537	0.0624077	0.0820057	0.761016	0.446647	0.722925
2810021J22Rik	493.162	-0.0171847	0.105235	-0.163298	0.870284	0.950309
2810025M15Rik	674.727	-0.0946288	0.0986379	-0.959355	0.33738	0.638286
2810029C07Rik	91.1102	0.297884	0.159409	1.86868	0.0616677	0.264311
2810032G03Rik	21.0551	0.367528	0.369674	0.994193	0.320129	0.623109
2810047C21Rik1	59.6757	-0.42888	0.224049	-1.91422	0.0555918	0.247469
2810049E08Rik	1.40195	-0.748852	1.32159	-0.56663	0.570966	NA
2810403A07Rik	3242.85	0.100751	0.0558925	1.80259	0.0714528	0.289245
2810403D21Rik	26.4632	0.190854	0.344359	0.554228	0.579423	0.814194
2810404M03Rik	0	NA	NA	NA	NA	NA
2810405F15Rik	21.1473	-0.149732	0.359323	-0.416706	0.676894	0.864848
2810408A11Rik	214.135	0.295869	0.135297	2.18682	0.0287558	0.161201
2810408I11Rik	124.84	0.435979	0.180827	2.41103	0.0159077	0.106328
2810410L24Rik	362.729	-0.0157593	0.0897493	-0.175593	0.860614	0.946617
2810417H13Rik	1920.42	-0.1774	0.086524	-2.05029	0.0403357	0.201577
2810428I15Rik	639.59	0.237326	0.118313	2.00591	0.0448662	0.21448
2810429I04Rik	26.1359	-0.295293	0.364179	-0.810847	0.417454	0.700112
2810433D01Rik	11.7225	-0.310447	0.503661	-0.616382	0.537643	0.788969
2810442N19Rik	3.43026	-0.877036	0.833862	-1.05178	0.292902	NA
2810454H06Rik	113.478	0.477958	0.152623	3.13162	0.00173845	0.0197913
2810459M11Rik	26.9871	0.570063	0.308912	1.84539	0.0649803	0.272124
2810468N07Rik	218.976	0.282236	0.131263	2.15016	0.0315428	0.17039
2810471M01Rik	0.182586	1.08045	3.79795	0.284483	0.77604	NA
2810474O19Rik	2516	-0.155743	0.102697	-1.51653	0.129386	0.403824
2900005J15Rik	373.87	0.0452403	0.123708	0.365701	0.714588	0.882049
2900008C10Rik	30.0732	0.0769716	0.33428	0.230261	0.817889	0.926951
2900009J06Rik	28.0398	0.432479	0.300174	1.44076	0.149653	0.434928
2900011O08Rik	563.069	-0.0930308	0.0905188	-1.02775	0.304067	0.609897
2900026A02Rik	364.493	-0.170779	0.135193	-1.26322	0.20651	0.508736
2900041M22Rik	25.8537	-0.307536	0.396995	-0.77466	0.438541	0.717029
2900052N01Rik	5.82662	0.00510298	0.655749	0.00778191	0.993791	NA
2900055J20Rik	0	NA	NA	NA	NA	NA
2900057B20Rik	1.67497	1.17126	1.30982	0.894216	0.371206	NA
2900060B14Rik	3.29816	-0.575091	0.850002	-0.676576	0.498675	NA
2900076A07Rik	192.963	-0.0869461	0.124914	-0.696047	0.4864	0.752441
2900079G21Rik	0.198639	-0.449511	3.79876	-0.118331	0.905806	NA
2900092C05Rik	0	NA	NA	NA	NA	NA
2900092D14Rik	0.284035	-1.02659	3.41753	-0.30039	0.76388	NA
2900097C17Rik	5320.83	-0.0163619	0.0463803	-0.352777	0.724256	0.88775
3000002C10Rik	264.784	0.20733	0.109833	1.88768	0.0590689	0.257517
3010001F23Rik	44.3721	0.0219633	0.236695	0.0927912	0.926069	0.972741
3010026O09Rik	311.918	0.283973	0.121716	2.33307	0.0196443	0.123019
3100003L05Rik	2.32357	3.19222	1.456	2.19245	0.0283468	NA
3110001I22Rik	162.507	0.0875855	0.147065	0.595555	0.551473	0.798156
3110002H16Rik	762.22	-0.108133	0.112315	-0.962762	0.335667	0.636749
3110009E18Rik	53.3899	-0.0470767	0.227267	-0.207143	0.835899	0.934403
3110009F21Rik	0.0945505	-1.02659	3.79876	-0.270242	0.786974	NA
3110015C05Rik	0.293676	-0.449514	3.35941	-0.133807	0.893555	NA
3110021A11Rik	29.602	0.155366	0.295484	0.5258	0.599027	0.825505
3110021N24Rik	63.0056	-0.379699	0.468786	-0.809963	0.417962	0.700567
3110035E14Rik	9.09835	-0.0708769	0.549376	-0.129013	0.897347	0.962027
3110039I08Rik	7871.77	0.0192783	0.0746226	0.258343	0.796142	0.91833
3110039M20Rik	0	NA	NA	NA	NA	NA
3110040N11Rik	279.013	-0.0222396	0.100898	-0.220417	0.825546	0.930588
3110043O21Rik	1399.32	0.0751932	0.0748895	1.00405	0.315352	0.619164
3110045C21Rik	42.2112	0.110676	0.247517	0.447145	0.65477	0.852823
3110052M02Rik	355.593	-0.0628033	0.100669	-0.623859	0.53272	0.786118
3110056K07Rik	330.532	-0.137691	0.121133	-1.13669	0.255667	0.562051
3110057O12Rik	224.584	1.73308	0.25966	6.67442	2.48208e-11	2.15782e-09
3110062M04Rik	175.778	-0.0849998	0.129941	-0.654141	0.513021	0.771096
3110070M22Rik	20.3894	-0.398141	0.561749	-0.708753	0.478478	0.747306
3110079O15Rik	0	NA	NA	NA	NA	NA
3110082I17Rik	437.05	-0.104954	0.116222	-0.903049	0.3665	0.662285
3110082J24Rik	0.637956	-2.02623	2.24306	-0.903335	0.366348	NA
3110099E03Rik	6.10262	-0.464929	0.592985	-0.784048	0.433012	NA
3200001D21Rik	10.0646	-0.0433101	0.532365	-0.0813541	0.93516	0.976311
3300002I08Rik	32.0925	-0.452934	0.340755	-1.32921	0.183779	0.481265
3300002P13Rik	3.10205	0.344602	0.871916	0.395224	0.692678	NA
3300005D01Rik	2.08032	-0.0306671	1.18995	-0.0257718	0.979439	NA
3425401B19Rik	7.04237	0.202835	0.839432	0.241633	0.809064	0.923406
3632451O06Rik	230.708	0.677966	0.144687	4.68573	2.78965e-06	8.5247e-05
3632454L22Rik	6.22452	0.267494	0.5848	0.457411	0.647376	NA
3830403N18Rik	189.129	1.35971	0.215568	6.30759	2.83411e-10	2.10384e-08
3830406C13Rik	730.693	0.108494	0.100733	1.07704	0.281463	0.586612
3830408C21Rik	91.1431	0.0125332	0.212802	0.0588963	0.953035	0.982528
3830417A13Rik	3.96105	-1.05558	0.877549	-1.20288	0.229024	NA
3830432H09Rik	11.7719	-0.525231	0.430867	-1.21901	0.22284	0.526711
3930402G23Rik	4.16126	-0.525194	0.74407	-0.70584	0.480288	NA
4430402I18Rik	16.367	0.178544	0.431105	0.414154	0.678761	0.865395
4631405J19Rik	1.67952	-0.125102	1.22694	-0.101963	0.918786	NA
4632404H12Rik	193.312	0.0109453	0.146603	0.0746591	0.940486	0.978407
4632415L05Rik	314.124	-0.0818122	0.131902	-0.62025	0.535093	0.787455
4632427E13Rik	26.212	-0.200903	0.362354	-0.554438	0.579279	0.814194
4632428C04Rik	15.0012	-0.367945	0.390954	-0.941148	0.346629	0.645745
4632428N05Rik	255.178	-0.147117	0.107891	-1.36357	0.172702	0.467157
4732416N19Rik	3.92343	1.60791	0.844827	1.90324	0.0570089	NA
4732456N10Rik	2.06742	-0.809894	1.08517	-0.746332	0.455467	NA
4732471J01Rik	61.2221	0.753633	0.238899	3.15461	0.00160713	0.0185562
4732490B19Rik	5.90473	-0.584026	0.63062	-0.926114	0.354387	NA
4732491K20Rik	43.5761	-0.11711	0.269956	-0.43381	0.664426	0.857949
4831407H17Rik	0.883291	-1.22977	1.72419	-0.713244	0.475695	NA
4831440E17Rik	234.2	0.1321	0.172674	0.765027	0.444256	0.721338
4833411C07Rik	1.3495	-0.412001	1.40295	-0.293668	0.769012	NA
4833412C05Rik	3.10779	-0.647305	0.948724	-0.68229	0.495056	NA
4833415N18Rik	6.73702	0.922328	0.7265	1.26955	0.204245	NA
4833417C18Rik	24.8386	-0.183361	0.315047	-0.582011	0.560559	0.802243
4833418N02Rik	45.927	0.337014	0.271258	1.24241	0.214084	0.517027
4833419F23Rik	14.4283	0.197909	0.446052	0.44369	0.657267	0.854033
4833420G17Rik	1635.3	-0.022269	0.0639029	-0.348482	0.727478	0.889033
4833422C13Rik	25.4188	-0.156028	0.334255	-0.466793	0.640648	0.845018
4833422M21Rik	1.75773	1.71651	1.36563	1.25694	0.208775	NA
4833423E24Rik	0	NA	NA	NA	NA	NA
4833427F10Rik	0.716097	-0.86834	2.00632	-0.432801	0.665159	NA
4833427G06Rik	7.21826	0.209643	0.562984	0.372379	0.709611	0.879348
4833428L15Rik	5.70751	-0.827697	0.751519	-1.10137	0.270738	NA
4833439L19Rik	1918.99	-0.0708663	0.0776208	-0.91298	0.361253	0.658204
4921501E09Rik	0.168747	0.512274	3.79876	0.134853	0.892728	NA
4921504A21Rik	40.0364	-0.326455	0.262808	-1.24218	0.214169	0.517117
4921504E06Rik	0.438839	0.693868	2.66436	0.260426	0.794535	NA
4921506M07Rik	0.38584	1.09974	2.73958	0.401426	0.688106	NA
4921507L20Rik	39.1792	0.125413	0.241432	0.519455	0.603444	0.828003
4921507P07Rik	61.6965	0.850947	0.227491	3.74057	0.000183601	0.00318467
4921508D12Rik	0.0945505	-1.02659	3.79876	-0.270242	0.786974	NA
4921509C19Rik	0.747843	-0.237314	1.98719	-0.119422	0.904941	NA
4921509O07Rik	0.265676	0.11893	3.46891	0.0342844	0.97265	NA
4921511C10Rik	1.38066	-0.332739	1.39029	-0.23933	0.81085	NA
4921511C20Rik	0.0839723	-0.0648009	3.79876	-0.0170584	0.98639	NA
4921511H03Rik	0	NA	NA	NA	NA	NA
4921511I17Rik	0.350422	-1.74695	3.0909	-0.565191	0.571944	NA
4921511M17Rik	0	NA	NA	NA	NA	NA
4921513I03Rik	2.48817	0.541597	1.04587	0.517845	0.604566	NA
4921515E04Rik	0	NA	NA	NA	NA	NA
4921517D22Rik	89.3221	-0.0970244	0.214633	-0.452048	0.651234	0.850822
4921518K17Rik	0.814611	-0.709839	1.82996	-0.387899	0.698091	NA
4921524J17Rik	676.595	-0.0471682	0.0868797	-0.542914	0.587189	0.817569
4921524L21Rik	0	NA	NA	NA	NA	NA
4921525O09Rik	17.9669	-0.438	0.340968	-1.28458	0.19894	0.500088
4921529L05Rik	8.56884	0.139905	0.525495	0.266235	0.790058	0.916306
4921530L21Rik	0	NA	NA	NA	NA	NA
4921531C22Rik	124.239	0.0348859	0.142314	0.245134	0.806353	0.92211
4921531P14Rik	8.57425	0.758517	0.541332	1.4012	0.161153	0.450536
4921533I20Rik	4.59691	0.204851	0.736032	0.278319	0.780768	NA
4921534H16Rik	0.749651	2.43788	2.13655	1.14104	0.253855	NA
4921536K21Rik	9.03512	-0.181446	0.538693	-0.336827	0.736247	0.893556
4921539E11Rik	4.22027	0.941292	0.784347	1.2001	0.230102	NA
4922502D21Rik	0	NA	NA	NA	NA	NA
4922502H24Rik	0.111355	-0.0648009	3.79876	-0.0170584	0.98639	NA
4922502N22Rik	0.224059	-1.02659	3.79876	-0.270243	0.786973	NA
4930401C15Rik	0	NA	NA	NA	NA	NA
4930401O10Rik	0.282064	1.10155	3.40051	0.323937	0.745986	NA
4930401O12Rik	0	NA	NA	NA	NA	NA
4930402F06Rik	0.0877705	0.512277	3.79876	0.134854	0.892728	NA
4930402F11Rik	0.0847751	0.512277	3.79876	0.134854	0.892728	NA
4930402H24Rik	631.736	-0.236333	0.180999	-1.30572	0.191649	0.49131
4930402K13Rik	0.11439	0.512277	3.79876	0.134854	0.892728	NA
4930404A05Rik	0	NA	NA	NA	NA	NA
4930404H11Rik	0.587514	1.15279	2.05223	0.561723	0.574305	NA
4930404I05Rik	86.1541	0.459493	0.199727	2.30061	0.0214139	0.131214
4930404N11Rik	70.32	0.116954	0.186061	0.628577	0.529626	0.783887
4930405A10Rik	0	NA	NA	NA	NA	NA
4930405A21Rik	31.7397	0.488673	0.337516	1.44785	0.147659	0.431709
4930405D11Rik	0.0681962	0.512277	3.79876	0.134854	0.892728	NA
4930405J17Rik	0	NA	NA	NA	NA	NA
4930405L22Rik	0.222327	1.48832	3.78715	0.392991	0.694326	NA
4930405O22Rik	0.506936	1.02425	2.27823	0.449581	0.653013	NA
4930406D18Rik	0	NA	NA	NA	NA	NA
4930407G08Rik	0	NA	NA	NA	NA	NA
4930407I10Rik	1.83533	0.459823	1.06509	0.431722	0.665943	NA
4930407I19Rik	0.111355	-0.0648009	3.79876	-0.0170584	0.98639	NA
4930412B13Rik	0	NA	NA	NA	NA	NA
4930412C18Rik	44.8567	-0.129682	0.261066	-0.496739	0.619373	0.835332
4930412O13Rik	104.404	-0.745195	0.195274	-3.81615	0.000135549	0.00245665
4930413E15Rik	0.508009	1.09839	2.09441	0.524437	0.599975	NA
4930413F20Rik	4.15995	-0.373434	0.744958	-0.501282	0.616172	NA
4930413G21Rik	554.647	-0.32312	0.0974221	-3.3167	0.000910886	0.011734
4930413M19Rik	0	NA	NA	NA	NA	NA
4930414N06Rik	4.84164	1.15742	0.909218	1.27298	0.203025	NA
4930415F15Rik	2.38055	-0.667692	1.29938	-0.513856	0.607353	NA
4930415L06Rik	0	NA	NA	NA	NA	NA
4930415O20Rik	7.49644	-0.313094	0.535908	-0.584231	0.559065	0.801397
4930417O13Rik	0.694588	2.86225	1.91788	1.4924	0.135593	NA
4930417O22Rik	0.0877705	0.512277	3.79876	0.134854	0.892728	NA
4930419G24Rik	0.111355	-0.0648009	3.79876	-0.0170584	0.98639	NA
4930423M02Rik	0.338883	1.08158	2.80529	0.385549	0.69983	NA
4930425K10Rik	0.112704	-1.02659	3.79876	-0.270242	0.786974	NA
4930425L21Rik	0	NA	NA	NA	NA	NA
4930425O10Rik	12.8701	0.398471	0.405393	0.982925	0.325644	0.627826
4930426D05Rik	104.503	-0.0318454	0.265757	-0.119829	0.904619	0.965019
4930426L09Rik	12.5603	-0.0327342	0.447776	-0.0731038	0.941723	0.978812
4930427A07Rik	546.451	0.411332	0.124843	3.29479	0.000984958	0.0125293
4930428D20Rik	0	NA	NA	NA	NA	NA
4930428E07Rik	0	NA	NA	NA	NA	NA
4930428G15Rik	6.48569	-0.946658	0.601916	-1.57274	0.115779	NA
4930428O21Rik	2.51802	-0.0973572	1.08331	-0.08987	0.928391	NA
4930429B21Rik	12.3109	0.198155	0.447279	0.443024	0.657748	0.854143
4930429D17Rik	0.888671	-0.618884	1.56457	-0.395561	0.692429	NA
4930429F11Rik	0	NA	NA	NA	NA	NA
4930429F24Rik	19.3432	0.766259	0.367523	2.08492	0.0370762	0.191045
4930430A15Rik	0	NA	NA	NA	NA	NA
4930430F08Rik	207.6	-0.120058	0.12213	-0.983035	0.32559	0.627826
4930430F21Rik	0	NA	NA	NA	NA	NA
4930430J02Rik	2.92574	0.0187563	0.931705	0.0201312	0.983939	NA
4930431F12Rik	0	NA	NA	NA	NA	NA
4930431P03Rik	0.862025	0.133453	1.97068	0.0677195	0.946009	NA
4930432J09Rik	0.827236	-3.14113	2.20554	-1.4242	0.154389	NA
4930432K21Rik	413.636	1.60471	0.170169	9.43008	4.09787e-21	1.58617e-18
4930432M17Rik	0	NA	NA	NA	NA	NA
4930433B08Rik	0	NA	NA	NA	NA	NA
4930433I11Rik	0	NA	NA	NA	NA	NA
4930433N12Rik	4.83933	0.336582	0.721665	0.466397	0.640931	NA
4930434J06Rik	0	NA	NA	NA	NA	NA
4930435E12Rik	0.340625	-1.02659	3.22471	-0.318352	0.750218	NA
4930438E09Rik	0	NA	NA	NA	NA	NA
4930440C22Rik	0	NA	NA	NA	NA	NA
4930440I19Rik	0.175541	1.10224	3.79763	0.290243	0.77163	NA
4930441H08Rik	0	NA	NA	NA	NA	NA
4930441J16Rik	0.0839723	-0.0648009	3.79876	-0.0170584	0.98639	NA
4930442J19Rik	0.10194	-0.0648009	3.79876	-0.0170584	0.98639	NA
4930442L01Rik	0.222709	-0.0648047	3.79876	-0.0170594	0.986389	NA
4930443O20Rik	1.81406	1.01413	1.3062	0.776394	0.437516	NA
4930444F02Rik	0.324266	1.49449	3.27103	0.456888	0.647752	NA
4930444G20Rik	5.92204	0.465132	0.613664	0.757959	0.448476	NA
4930444M15Rik	2.73971	1.83639	1.1307	1.62412	0.104351	NA
4930444P10Rik	6.02605	0.502403	0.570658	0.880393	0.378646	NA
4930445N18Rik	2.53539	-0.616883	0.889438	-0.693564	0.487955	NA
4930447A16Rik	0.10194	-0.0648009	3.79876	-0.0170584	0.98639	NA
4930447C04Rik	1488.51	1.26096	0.254805	4.94871	7.4707e-07	2.68084e-05
4930447F24Rik	4.51066	-0.883241	0.695056	-1.27075	0.203818	NA
4930447J18Rik	0	NA	NA	NA	NA	NA
4930447K03Rik	16.0336	-0.140771	0.391463	-0.359601	0.719145	0.885283
4930447M23Rik	7.42098	-0.13268	0.598637	-0.221636	0.824597	0.930225
4930447N08Rik	0.275451	-1.50768	3.39552	-0.444021	0.657027	NA
4930448C13Rik	0	NA	NA	NA	NA	NA
4930448F12Rik	0	NA	NA	NA	NA	NA
4930448H16Rik	1.00368	2.02238	1.91831	1.05425	0.291767	NA
4930448I06Rik	0	NA	NA	NA	NA	NA
4930448I18Rik	0	NA	NA	NA	NA	NA
4930448K20Rik	0	NA	NA	NA	NA	NA
4930449E01Rik	0.677098	-0.794027	2.10401	-0.377388	0.705885	NA
4930449E18Rik	0	NA	NA	NA	NA	NA
4930449I24Rik	0	NA	NA	NA	NA	NA
4930451G09Rik	88.0505	0.51314	0.197153	2.60275	0.00924806	0.0726659
4930451I11Rik	0.922444	-2.40146	1.60376	-1.4974	0.13429	NA
4930452A19Rik	0	NA	NA	NA	NA	NA
4930452B06Rik	319.697	-0.0378436	0.119614	-0.316382	0.751713	0.90036
4930452G13Rik	0.817107	1.64841	1.7329	0.951243	0.341481	NA
4930452N14Rik	0.10194	-0.0648009	3.79876	-0.0170584	0.98639	NA
4930453H23Rik	0.0859343	0.512277	3.79876	0.134854	0.892728	NA
4930453L07Rik	0.821592	1.04544	1.86308	0.561134	0.574706	NA
4930453N24Rik	710.578	-0.00139813	0.0682692	-0.0204796	0.983661	0.993685
4930455B14Rik	0.501579	0.756923	2.32019	0.326233	0.744248	NA
4930455C13Rik	3.81699	-0.589837	0.817909	-0.721152	0.470816	NA
4930455D15Rik	0.55168	-0.519467	2.47347	-0.210016	0.833655	NA
4930455F16Rik	0.367109	1.10106	3.17656	0.346618	0.728878	NA
4930455G09Rik	15.8716	-0.369031	0.381114	-0.968294	0.332898	0.634457
4930455H04Rik	0.710892	0.741891	2.36154	0.314155	0.753403	NA
4930455J16Rik	0	NA	NA	NA	NA	NA
4930456L15Rik	0.752612	-1.61438	1.7278	-0.934354	0.350121	NA
4930459C07Rik	0.493943	-1.02659	2.5279	-0.406105	0.684665	NA
4930459L07Rik	0	NA	NA	NA	NA	NA
4930461G14Rik	126.409	-0.855112	0.223148	-3.83205	0.000127082	0.00232132
4930463O16Rik	0.72194	-0.863358	1.90842	-0.452395	0.650985	NA
4930465K10Rik	3.09108	-0.664794	0.862708	-0.77059	0.44095	NA
4930465M20Rik	0	NA	NA	NA	NA	NA
4930467D21Rik	10.5587	0.890375	0.464641	1.91627	0.0553313	0.246647
4930467E23Rik	1.24758	-0.596126	1.31682	-0.452701	0.650764	NA
4930467K11Rik	0.741194	0.572855	1.90544	0.300642	0.763687	NA
4930469G21Rik	2.06899	0.404809	1.27775	0.316814	0.751385	NA
4930470H14Rik	0.209678	-1.07634	3.77639	-0.285017	0.775631	NA
4930470O06Rik	0	NA	NA	NA	NA	NA
4930470P17Rik	0.291106	0.107123	3.42358	0.0312898	0.975038	NA
4930471C04Rik	0.199165	1.10224	3.79763	0.290243	0.77163	NA
4930471G03Rik	0	NA	NA	NA	NA	NA
4930471M09Rik	3.08796	1.06679	0.98379	1.08436	0.278204	NA
4930473A02Rik	17.3841	0.664068	0.388422	1.70966	0.0873296	0.324878
4930473O22Rik	0	NA	NA	NA	NA	NA
4930474G06Rik	0.216329	0.512274	3.79876	0.134853	0.892728	NA
4930474H20Rik	0.0847751	0.512277	3.79876	0.134854	0.892728	NA
4930474M22Rik	1.26353	-0.737342	1.42899	-0.515989	0.605862	NA
4930474N05Rik	0	NA	NA	NA	NA	NA
4930474N09Rik	1.83934	0.146383	1.07932	0.135626	0.892117	NA
4930477N07Rik	0.155967	1.08045	3.79795	0.284483	0.77604	NA
4930478L05Rik	0.314714	1.87619	3.76745	0.498002	0.618483	NA
4930478P22Rik	0.0877705	0.512277	3.79876	0.134854	0.892728	NA
4930479D17Rik	2.47078	0.566428	1.10415	0.512997	0.607954	NA
4930480E11Rik	0	NA	NA	NA	NA	NA
4930480G23Rik	0.170136	0.512274	3.79876	0.134853	0.892728	NA
4930480K15Rik	0	NA	NA	NA	NA	NA
4930480K23Rik	101.212	0.609975	0.220524	2.76602	0.00567449	0.050548
4930480M12Rik	0.402582	-2.06687	2.64472	-0.781509	0.434503	NA
4930481A15Rik	85.4211	0.206754	0.186688	1.10748	0.268086	0.574289
4930482G09Rik	0.66457	-2.48103	2.30854	-1.07472	0.282502	NA
4930483J18Rik	2.85919	0.753229	1.00026	0.753033	0.45143	NA
4930483K19Rik	7.15411	-0.73604	0.7947	-0.926186	0.354349	0.6521
4930483O08Rik	1.17836	0.390384	1.45806	0.267742	0.788898	NA
4930484H19Rik	0.238906	1.56604	3.55431	0.440602	0.659501	NA
4930486F22Rik	0	NA	NA	NA	NA	NA
4930486I03Rik	0	NA	NA	NA	NA	NA
4930486L24Rik	7.63078	-0.0174758	0.674382	-0.0259139	0.979326	0.992266
4930487D11Rik	0.0681962	0.512277	3.79876	0.134854	0.892728	NA
4930487H11Rik	0.345068	-0.825782	3.21096	-0.257176	0.797043	NA
4930488B22Rik	0	NA	NA	NA	NA	NA
4930488L21Rik	0.112704	-1.02659	3.79876	-0.270242	0.786974	NA
4930500F04Rik	0.0681962	0.512277	3.79876	0.134854	0.892728	NA
4930500L23Rik	0	NA	NA	NA	NA	NA
4930502A04Rik	0.112704	-1.02659	3.79876	-0.270242	0.786974	NA
4930502E09Rik	3.33586	-0.760283	0.90693	-0.838304	0.40186	NA
4930502E18Rik	84.1034	-0.0803285	0.179136	-0.448423	0.653848	0.852285
4930503B20Rik	4.83279	0.322582	0.747254	0.43169	0.665967	NA
4930503E14Rik	8.80221	-1.01183	0.542236	-1.86603	0.0620369	0.265261
4930503E24Rik	37.7536	-0.0423925	0.438579	-0.0966587	0.922997	0.971397
4930503F20Rik	0.817142	2.97792	2.03448	1.46373	0.143269	NA
4930503H13Rik	0	NA	NA	NA	NA	NA
4930503L19Rik	403.504	-0.34985	0.159048	-2.19965	0.0278316	0.157969
4930503O07Rik	0.172546	1.10224	3.79763	0.290243	0.77163	NA
4930504C09Rik	0	NA	NA	NA	NA	NA
4930504O13Rik	4.0618	1.34072	0.936975	1.4309	0.152458	NA
4930505A04Rik	3.64283	-0.791205	0.756515	-1.04585	0.295628	NA
4930505G20Rik	0	NA	NA	NA	NA	NA
4930505K13Rik	0	NA	NA	NA	NA	NA
4930505K14Rik	0	NA	NA	NA	NA	NA
4930506A18Rik	0.20216	1.10224	3.79763	0.290243	0.77163	NA
4930506C21Rik	36.5132	0.163208	0.276024	0.59128	0.554333	0.799555
4930507D05Rik	16.7217	-0.169286	0.396078	-0.427406	0.669083	0.860286
4930507D10Rik	0	NA	NA	NA	NA	NA
4930509E16Rik	13.2146	1.0038	0.509744	1.96923	0.0489266	0.227074
4930509J09Rik	0.0945505	-1.02659	3.79876	-0.270242	0.786974	NA
4930509K18Rik	0.0877705	0.512277	3.79876	0.134854	0.892728	NA
4930511A02Rik	0.671293	-0.0684754	1.80617	-0.037912	0.969758	NA
4930511A08Rik	1.02613	0.830454	1.56105	0.531984	0.594737	NA
4930511E03Rik	1.5713	-2.56444	1.38757	-1.84815	0.0645803	NA
4930511M06Rik	46.1841	0.158853	0.262225	0.605789	0.544655	0.793338
4930512B01Rik	1.83877	-1.19912	1.22197	-0.981296	0.326447	NA
4930512J16Rik	0.533254	-2.69445	2.44217	-1.1033	0.269897	NA
4930512M02Rik	0.162747	-0.449511	3.79876	-0.118331	0.905806	NA
4930513D17Rik	0.336451	0.621698	2.78591	0.223158	0.823413	NA
4930513N10Rik	150.94	-0.0384034	0.176521	-0.217556	0.827775	0.931357
4930513O06Rik	0	NA	NA	NA	NA	NA
4930515B02Rik	0	NA	NA	NA	NA	NA
4930515G01Rik	24.8101	0.00392202	0.302188	0.0129787	0.989645	0.996408
4930515G16Rik	0	NA	NA	NA	NA	NA
4930515L03Rik	0.0681962	0.512277	3.79876	0.134854	0.892728	NA
4930515L19Rik	0	NA	NA	NA	NA	NA
4930517E11Rik	0.0681962	0.512277	3.79876	0.134854	0.892728	NA
4930517M08Rik	0	NA	NA	NA	NA	NA
4930518J21Rik	0.0877705	0.512277	3.79876	0.134854	0.892728	NA
4930518P08Rik	0.415119	-1.60444	3.05142	-0.525801	0.599026	NA
4930519D14Rik	0	NA	NA	NA	NA	NA
4930519F09Rik	41.4014	0.229233	0.262715	0.872554	0.382906	0.675074
4930519F16Rik	0.0847751	0.512277	3.79876	0.134854	0.892728	NA
4930519F24Rik	0	NA	NA	NA	NA	NA
4930519G04Rik	0.324714	1.5788	2.81192	0.561466	0.57448	NA
4930519H02Rik	0	NA	NA	NA	NA	NA
4930519K11Rik	1.60891	-0.405418	1.15158	-0.352055	0.724797	NA
4930520O04Rik	49.9669	-0.4368	0.238687	-1.83001	0.0672485	0.278608
4930520P13Rik	0	NA	NA	NA	NA	NA
4930521E06Rik	0.274101	-0.449514	3.43212	-0.130973	0.895797	NA
4930522H14Rik	0	NA	NA	NA	NA	NA
4930522O17Rik	0	NA	NA	NA	NA	NA
4930523C07Rik	348.696	-0.126683	0.103501	-1.22398	0.220958	0.524796
4930523O13Rik	0	NA	NA	NA	NA	NA
4930524B15Rik	271.604	2.76993	0.251088	11.0317	2.68761e-28	2.91283e-25
4930524B17Rik	0	NA	NA	NA	NA	NA
4930524C18Rik	0	NA	NA	NA	NA	NA
4930524N10Rik	0	NA	NA	NA	NA	NA
4930524O05Rik	0.363654	-1.23819	2.70183	-0.45828	0.646751	NA
4930524O08Rik	0.175541	1.10224	3.79763	0.290243	0.77163	NA
4930525C09Rik	0	NA	NA	NA	NA	NA
4930525D18Rik	2.05357	0.702503	1.40298	0.500723	0.616566	NA
4930525G20Rik	31.6059	-0.175493	0.290492	-0.604124	0.545761	0.793883
4930526H09Rik	0.0859343	0.512277	3.79876	0.134854	0.892728	NA
4930526I15Rik	329.008	0.310434	0.107633	2.8842	0.00392413	0.0378827
4930526L06Rik	9.74858	-0.709167	0.499977	-1.4184	0.156074	0.444283
4930527F14Rik	0.199125	0.512274	3.79876	0.134853	0.892728	NA
4930527G23Rik	0	NA	NA	NA	NA	NA
4930528A17Rik	24.5747	0.353082	0.375206	0.941036	0.346687	0.645745
4930528D03Rik	0.378676	1.081	3.19684	0.338146	0.735253	NA
4930528G23Rik	0	NA	NA	NA	NA	NA
4930528H21Rik	0.277996	-2.52815	3.29464	-0.767352	0.442873	NA
4930528P14Rik	0	NA	NA	NA	NA	NA
4930529C04Rik	259.019	-0.0651967	0.221966	-0.293724	0.768969	0.908917
4930529K09Rik	0	NA	NA	NA	NA	NA
4930529L06Rik	0	NA	NA	NA	NA	NA
4930532I03Rik	0.152168	0.512274	3.79876	0.134853	0.892728	NA
4930532M18Rik	0	NA	NA	NA	NA	NA
4930533B01Rik	0	NA	NA	NA	NA	NA
4930533N22Rik	0	NA	NA	NA	NA	NA
4930533P14Rik	0	NA	NA	NA	NA	NA
4930538K18Rik	4.86443	-0.353601	0.700345	-0.504895	0.613633	NA
4930539C22Rik	0	NA	NA	NA	NA	NA
4930539E08Rik	44.4198	-0.024843	0.27069	-0.0917765	0.926876	0.972954
4930539J05Rik	175.942	-0.0323006	0.169302	-0.190787	0.848693	0.940568
4930539M17Rik	2.09661	0.535238	1.50717	0.355129	0.722493	NA
4930539N22Rik	0	NA	NA	NA	NA	NA
4930540M03Rik	0	NA	NA	NA	NA	NA
4930542C21Rik	0.47977	-0.681458	2.47645	-0.275176	0.783181	NA
4930542D17Rik	1.04728	-1.62724	1.65885	-0.980948	0.326619	NA
4930543E12Rik	2.14179	-0.449948	1.46883	-0.306332	0.759352	NA
4930543N07Rik	0	NA	NA	NA	NA	NA
4930544D05Rik	0.643242	1.59882	2.16441	0.738685	0.460098	NA
4930544G11Rik	0	NA	NA	NA	NA	NA
4930544M13Rik	0	NA	NA	NA	NA	NA
4930545E07Rik	0	NA	NA	NA	NA	NA
4930545H06Rik	0.070741	-1.02659	3.79876	-0.270242	0.786974	NA
4930545L23Rik	0.213294	-0.0648045	3.79876	-0.0170594	0.986389	NA
4930546C10Rik	0.0859343	0.512277	3.79876	0.134854	0.892728	NA
4930546K05Rik	1.15412	-0.256633	1.53581	-0.167099	0.867292	NA
4930547E08Rik	5.12417	0.0845849	0.628215	0.134643	0.892894	NA
4930547E14Rik	0.11439	0.512277	3.79876	0.134854	0.892728	NA
4930548G14Rik	0	NA	NA	NA	NA	NA
4930548H24Rik	34.5825	-0.743171	0.379591	-1.95782	0.0502508	0.230666
4930548J01Rik	0.313555	1.87123	3.76772	0.496649	0.619436	NA
4930548K13Rik	0	NA	NA	NA	NA	NA
4930549C01Rik	0.11439	0.512277	3.79876	0.134854	0.892728	NA
4930549C15Rik	0.434349	-2.13119	2.92626	-0.7283	0.46643	NA
4930549G23Rik	7.52078	-0.721008	0.636465	-1.13283	0.257285	0.563657
4930550C14Rik	40.9789	-0.0617808	0.250302	-0.246825	0.805044	0.921619
4930550C17Rik	0.111355	-0.0648009	3.79876	-0.0170584	0.98639	NA
4930550L24Rik	236.149	0.205037	0.177762	1.15343	0.248733	0.554942
4930552N02Rik	0	NA	NA	NA	NA	NA
4930552P12Rik	1.62658	-1.58999	1.26189	-1.26001	0.207666	NA
4930553C11Rik	0	NA	NA	NA	NA	NA
4930553E22Rik	0	NA	NA	NA	NA	NA
4930554C24Rik	0	NA	NA	NA	NA	NA
4930554G24Rik	0.0859343	0.512277	3.79876	0.134854	0.892728	NA
4930554H23Rik	0	NA	NA	NA	NA	NA
4930554I06Rik	0.0877705	0.512277	3.79876	0.134854	0.892728	NA
4930555B11Rik	0.0877705	0.512277	3.79876	0.134854	0.892728	NA
4930555B12Rik	0	NA	NA	NA	NA	NA
4930555G01Rik	4.8982	0.797621	0.737993	1.0808	0.279787	NA
4930555G21Rik	0	NA	NA	NA	NA	NA
4930555K05Rik	0	NA	NA	NA	NA	NA
4930556C24Rik	0.10194	-0.0648009	3.79876	-0.0170584	0.98639	NA
4930556G01Rik	2.0576	0.532544	1.2521	0.42532	0.670603	NA
4930556J02Rik	0.0877705	0.512277	3.79876	0.134854	0.892728	NA
4930556M19Rik	178.405	0.0266175	0.12751	0.208748	0.834645	0.93406
4930556N09Rik	0	NA	NA	NA	NA	NA
4930556N13Rik	1.15799	-2.10769	1.65515	-1.27342	0.20287	NA
4930557A04Rik	0	NA	NA	NA	NA	NA
4930557F10Rik	0.530808	1.11526	2.27426	0.490381	0.623864	NA
4930557J02Rik	0.522581	1.39948	2.52246	0.554809	0.579026	NA
4930557K07Rik	12.0493	0.210177	0.489101	0.42972	0.667399	0.858991
4930558C23Rik	1.92581	-1.80282	1.46175	-1.23333	0.217453	NA
4930558F17Rik	0.175541	1.10224	3.79763	0.290243	0.77163	NA
4930558G05Rik	0	NA	NA	NA	NA	NA
4930558J18Rik	63.0208	-0.29154	0.218156	-1.33638	0.181424	0.478258
4930558K02Rik	4.59982	3.19999	1.05358	3.03727	0.00238732	NA
4930559C10Rik	0	NA	NA	NA	NA	NA
4930562C15Rik	5.54223	-0.91097	0.736058	-1.23763	0.215852	NA
4930562F07Rik	9.43993	0.0283243	0.486537	0.0582162	0.953576	0.982653
4930563D23Rik	0.381376	-1.03836	3.12925	-0.331822	0.740023	NA
4930563E18Rik	163.629	-0.0379803	0.147923	-0.256757	0.797366	0.918527
4930563E22Rik	172.267	0.0933419	0.138161	0.675601	0.499294	0.761447
4930563F08Rik	0.62822	-0.702487	2.31792	-0.303068	0.761838	NA
4930563H07Rik	0	NA	NA	NA	NA	NA
4930563M20Rik	0.307845	-1.02659	3.33437	-0.307882	0.758172	NA
4930563M21Rik	3.65912	0.0178891	0.773144	0.0231381	0.98154	NA
4930564B18Rik	0	NA	NA	NA	NA	NA
4930564C03Rik	0.158512	-0.449511	3.79876	-0.118331	0.905806	NA
4930564D02Rik	0	NA	NA	NA	NA	NA
4930565D16Rik	0	NA	NA	NA	NA	NA
4930565N06Rik	8.06411	-0.0882665	2.02544	-0.0435789	0.96524	0.986975
4930567H12Rik	0.812001	-0.10644	1.64978	-0.0645177	0.948558	NA
4930567H17Rik	0	NA	NA	NA	NA	NA
4930567J20Rik	0	NA	NA	NA	NA	NA
4930567K12Rik	0.0847751	0.512277	3.79876	0.134854	0.892728	NA
4930567K20Rik	0	NA	NA	NA	NA	NA
4930568D16Rik	0	NA	NA	NA	NA	NA
4930568E12Rik	0.856367	0.951253	1.97616	0.481363	0.630258	NA
4930568G15Rik	0.152971	1.08045	3.79795	0.284483	0.77604	NA
4930570G19Rik	6.69296	-0.63391	0.600645	-1.05538	0.29125	NA
4930571K23Rik	0.070741	-1.02659	3.79876	-0.270242	0.786974	NA
4930571O06Rik	0	NA	NA	NA	NA	NA
4930572K03Rik	0	NA	NA	NA	NA	NA
4930572O03Rik	24.5132	-0.0219684	0.331648	-0.0662402	0.947187	0.980507
4930572O13Rik	0	NA	NA	NA	NA	NA
4930573O16Rik	0	NA	NA	NA	NA	NA
4930577N17Rik	63.5226	-0.178335	0.187699	-0.95011	0.342056	0.642348
4930578C19Rik	9.95783	-0.348172	0.538227	-0.646887	0.517705	0.774984
4930578E11Rik	0.350621	0.119824	2.78566	0.0430146	0.96569	NA
4930578I06Rik	0.533944	0.233314	2.51512	0.0927646	0.926091	NA
4930578M01Rik	1.68883	0.534422	1.28079	0.417261	0.676488	NA
4930578N18Rik	0	NA	NA	NA	NA	NA
4930579F01Rik	0.189101	-1.9734	3.7499	-0.526255	0.598711	NA
4930579G18Rik	68.3335	-0.225711	0.379044	-0.595474	0.551527	0.798156
4930579G24Rik	313.054	0.547917	0.115567	4.74111	2.12554e-06	6.67083e-05
4930579H20Rik	0.182096	-1.02659	3.79876	-0.270243	0.786973	NA
4930579J19Rik	0	NA	NA	NA	NA	NA
4930579K19Rik	46.686	-0.134968	0.288057	-0.468545	0.639395	0.844478
4930579P08Rik	0	NA	NA	NA	NA	NA
4930581F22Rik	177.379	-0.0278415	0.140778	-0.19777	0.843225	0.937962
4930583K01Rik	2.4395	-0.374494	0.991455	-0.377721	0.705638	NA
4930583P06Rik	0.10194	-0.0648009	3.79876	-0.0170584	0.98639	NA
4930584F24Rik	0	NA	NA	NA	NA	NA
4930586N03Rik	0.33038	0.693032	3.28258	0.211124	0.832791	NA
4930587E11Rik	0.0839723	-0.0648009	3.79876	-0.0170584	0.98639	NA
4930590J08Rik	2.94286	1.07254	1.002	1.0704	0.284439	NA
4930590L20Rik	0	NA	NA	NA	NA	NA
4930591A17Rik	2.02477	-1.90581	1.30981	-1.45503	0.145661	NA
4930591E09Rik	0	NA	NA	NA	NA	NA
4930592A05Rik	11.5127	0.128405	0.68192	0.188299	0.850642	0.941253
4930592I03Rik	0.872853	1.56794	1.82651	0.858436	0.390652	NA
4930593A02Rik	0.182321	-0.449511	3.79876	-0.118331	0.905806	NA
4930593C16Rik	0.11439	0.512277	3.79876	0.134854	0.892728	NA
4930594C11Rik	81.3109	-0.14421	0.178436	-0.808188	0.418982	0.701183
4930594O21Rik	0.200324	1.10224	3.79763	0.290243	0.77163	NA
4930595D18Rik	1.64383	-0.339802	1.29761	-0.261868	0.793424	NA
4930595M18Rik	0.368233	-0.449517	2.74584	-0.163708	0.869961	NA
4930596D02Rik	0	NA	NA	NA	NA	NA
4930596I21Rik	1.17598	-0.860793	1.95803	-0.439622	0.660211	NA
4930597A21Rik	0.11439	0.512277	3.79876	0.134854	0.892728	NA
4930597G03Rik	0	NA	NA	NA	NA	NA
4930598F16Rik	0	NA	NA	NA	NA	NA
4930599N23Rik	21.992	0.761892	0.432444	1.76183	0.0780985	0.304618
4931402G19Rik	7.02076	0.102463	0.632003	0.162124	0.871208	0.950684
4931403E22Rik	8.47907	-0.402612	0.519064	-0.775649	0.437956	0.716575
4931403G20Rik	2.01641	-0.5919	1.06069	-0.558032	0.576822	NA
4931406B18Rik	0.182321	-0.449511	3.79876	-0.118331	0.905806	NA
4931406C07Rik	1154.95	0.032296	0.0705106	0.458031	0.64693	0.848622
4931406H21Rik	25.5595	-0.444062	0.381425	-1.16422	0.244335	0.550074
4931406P16Rik	1993.42	0.315478	0.093494	3.37432	0.000739992	0.0099176
4931408C20Rik	0.267096	0.139881	3.45944	0.0404345	0.967747	NA
4931408D14Rik	3.18266	0.846397	0.957078	0.884355	0.376504	NA
4931409K22Rik	3.78753	-0.631882	0.842045	-0.750414	0.453005	NA
4931414P19Rik	236.613	-0.0632222	0.102507	-0.616762	0.537392	0.788767
4931417E11Rik	0	NA	NA	NA	NA	NA
4931419H13Rik	0.321645	-1.50494	3.23329	-0.46545	0.641609	NA
4931420L22Rik	0.111355	-0.0648009	3.79876	-0.0170584	0.98639	NA
4931423N10Rik	1.30722	0.548902	1.53325	0.357999	0.720344	NA
4931428F04Rik	189.698	-0.214879	0.128909	-1.66691	0.0955325	0.342161
4931428L18Rik	0.906394	0.357651	1.71117	0.209009	0.834441	NA
4931429I11Rik	1.09449	0.849664	1.55099	0.547819	0.583816	NA
4931429L15Rik	3.20289	0.569789	0.946862	0.601766	0.54733	NA
4931429P17Rik	0.354641	0.138087	2.77763	0.0497139	0.96035	NA
4931430N09Rik	0.0945505	-1.02659	3.79876	-0.270242	0.786974	NA
4931431B13Rik	0	NA	NA	NA	NA	NA
4931431C16Rik	3.13161	-0.144745	0.941009	-0.153819	0.877753	NA
4931431F19Rik	0.10194	-0.0648009	3.79876	-0.0170584	0.98639	NA
4931440F15Rik	66.8202	-0.26877	0.206737	-1.30005	0.193582	0.49358
4931440J10Rik	6.10629	0.30836	0.677943	0.454846	0.64922	NA
4931440P22Rik	39.324	0.0611083	0.250187	0.24425	0.807037	0.922556
4932411E22Rik	2.82864	-0.623451	0.817948	-0.762214	0.445932	NA
4932411N23Rik	0.0877705	0.512277	3.79876	0.134854	0.892728	NA
4932412D23Rik	0.169907	0.512274	3.79876	0.134853	0.892728	NA
4932413F04Rik	0.535229	1.05393	2.26067	0.466202	0.641071	NA
4932414J04Rik	0.111355	-0.0648009	3.79876	-0.0170584	0.98639	NA
4932414N04Rik	0.250517	0.118876	3.52922	0.0336833	0.97313	NA
4932415M13Rik	0	NA	NA	NA	NA	NA
4932416H05Rik	151.45	0.179737	0.128671	1.39688	0.162451	0.452315
4932416K20Rik	0.0839723	-0.0648009	3.79876	-0.0170584	0.98639	NA
4932418E24Rik	63.9905	-0.519562	0.758185	-0.685271	0.493173	0.757942
4932429P05Rik	0	NA	NA	NA	NA	NA
4932435O22Rik	71.2309	-0.347719	0.218773	-1.5894	0.111969	0.371365
4932438A13Rik	3341.01	0.313828	0.181202	1.73192	0.083287	0.315691
4932438H23Rik	5.41095	-0.049891	0.691546	-0.0721442	0.942487	NA
4932441J04Rik	2.21958	0.571571	1.15062	0.49675	0.619365	NA
4932443I19Rik	5.29927	-0.0625331	0.677299	-0.0923272	0.926438	NA
4932702P03Rik	2.17479	-0.984083	1.10496	-0.890603	0.373142	NA
4933400A11Rik	0	NA	NA	NA	NA	NA
4933400B14Rik	0.111355	-0.0648009	3.79876	-0.0170584	0.98639	NA
4933400C23Rik	0.737784	-2.69325	1.79514	-1.5003	0.133537	NA
4933400F21Rik	1.24488	-0.132344	1.4504	-0.0912461	0.927297	NA
4933400L20Rik	0.0839723	-0.0648009	3.79876	-0.0170584	0.98639	NA
4933401B06Rik	0.0681962	0.512277	3.79876	0.134854	0.892728	NA
4933401D09Rik	9.98127	-0.761896	0.534501	-1.42543	0.154032	0.441879
4933401H06Rik	0	NA	NA	NA	NA	NA
4933402C06Rik	0	NA	NA	NA	NA	NA
4933402D24Rik	7.50996	0.524493	0.658859	0.796062	0.425996	0.706892
4933402E13Rik	15.7835	-0.751284	0.507879	-1.47926	0.139071	0.419266
4933402J07Rik	0.567314	1.08253	2.23782	0.483745	0.628567	NA
4933402J10Rik	0	NA	NA	NA	NA	NA
4933402J15Rik	0.10194	-0.0648009	3.79876	-0.0170584	0.98639	NA
4933402N03Rik	0	NA	NA	NA	NA	NA
4933402N22Rik	0	NA	NA	NA	NA	NA
4933402P03Rik	1.79257	0.0244569	1.25521	0.0194842	0.984455	NA
4933403O08Rik	12.4232	1.14834	0.594747	1.93081	0.0535062	0.240623
4933404G15Rik	0.0859343	0.512277	3.79876	0.134854	0.892728	NA
4933404K08Rik	0.277136	0.118979	3.41686	0.0348211	0.972222	NA
4933404K13Rik	2.85882	-0.458663	1.11397	-0.411739	0.68053	NA
4933404O12Rik	182.437	0.702833	0.14204	4.94812	7.49324e-07	2.68084e-05
4933405D12Rik	5.767	-0.537478	0.597657	-0.899309	0.368488	NA
4933405E24Rik	0.0877705	0.512277	3.79876	0.134854	0.892728	NA
4933405L10Rik	7.84236	1.08423	0.617063	1.75707	0.078905	0.306822
4933405O20Rik	0.237746	1.55984	3.78343	0.412282	0.680133	NA
4933406C10Rik	42.1674	0.0774846	0.26917	0.287865	0.77345	0.910097
4933406D12Rik	0	NA	NA	NA	NA	NA
4933406F09Rik	0	NA	NA	NA	NA	NA
4933406G16Rik	0.288095	1.75641	3.38743	0.518508	0.604104	NA
4933406I18Rik	2.28749	1.47613	1.2176	1.21233	0.225385	NA
4933406J08Rik	129.701	2.42417	0.235181	10.3077	6.50557e-25	4.20976e-22
4933406J10Rik	0.500931	-2.0487	2.45327	-0.835091	0.403666	NA
4933406K04Rik	0.0877705	0.512277	3.79876	0.134854	0.892728	NA
4933406M09Rik	1.2537	-2.51539	1.72788	-1.45577	0.145458	NA
4933407E24Rik	0.111355	-0.0648009	3.79876	-0.0170584	0.98639	NA
4933407G14Rik	0	NA	NA	NA	NA	NA
4933407I05Rik	0.0945505	-1.02659	3.79876	-0.270242	0.786974	NA
4933407K13Rik	721.573	-0.265237	0.167017	-1.58809	0.112267	0.371791
4933407L21Rik	10.7126	0.0101212	0.473369	0.0213813	0.982942	0.993339
4933408B17Rik	56.5574	-0.243435	0.239452	-1.01663	0.309327	0.613634
4933408J17Rik	15.8434	0.58467	0.400223	1.46086	0.144054	0.426884
4933408N05Rik	0.54242	2.68562	2.44748	1.0973	0.27251	NA
4933409G03Rik	0	NA	NA	NA	NA	NA
4933409K07Rik	270.629	-0.176633	0.197316	-0.895181	0.37069	0.665626
4933411E08Rik	11.7825	-0.241431	0.504167	-0.478871	0.63203	0.840927
4933411G06Rik	0	NA	NA	NA	NA	NA
4933411K16Rik	3.14505	-0.145955	1.04032	-0.140298	0.888424	NA
4933412E12Rik	14.4326	-0.0261713	0.389987	-0.0671081	0.946496	0.980254
4933412E24Rik	0.456545	0.626913	2.34224	0.267656	0.788964	NA
4933412O06Rik	0	NA	NA	NA	NA	NA
4933413G19Rik	5.48788	0.152596	0.650942	0.234423	0.814657	NA
4933413J09Rik	428.479	-0.2741	0.136739	-2.00455	0.045011	0.215029
4933413L06Rik	0	NA	NA	NA	NA	NA
4933415F23Rik	63.7988	-0.208932	0.208748	-1.00088	0.316885	0.619928
4933416C03Rik	119.606	1.29334	0.22971	5.63033	1.79869e-08	9.37222e-07
4933416E03Rik	0	NA	NA	NA	NA	NA
4933416I08Rik	0.154713	-1.02659	3.79876	-0.270243	0.786973	NA
4933416M06Rik	0.635347	0.512275	2.35956	0.217106	0.828126	NA
4933416M07Rik	16.7972	-1.08436	0.415651	-2.60884	0.0090851	0.0716277
4933417A18Rik	0.683349	2.43637	2.18012	1.11754	0.263765	NA
4933417D19Rik	22.7866	-0.131688	0.325931	-0.404036	0.686186	0.868187
4933417E11Rik	2.39422	0.933438	0.98122	0.951304	0.34145	NA
4933417G07Rik	7.29038	-0.608215	0.633325	-0.960352	0.336878	0.637855
4933417O13Rik	4.40549	-1.33638	0.755835	-1.76809	0.0770457	NA
4933421I07Rik	0.302264	1.10142	3.33846	0.32992	0.741461	NA
4933421O10Rik	226.463	-0.150545	0.115099	-1.30797	0.190885	0.490471
4933422A05Rik	4.91902	0.420486	0.695942	0.604196	0.545713	NA
4933424G05Rik	1.23881	-0.150242	1.67485	-0.0897046	0.928522	NA
4933424G06Rik	2.73165	0.71639	0.897863	0.797884	0.424938	NA
4933425B07Rik	0.420208	0.512269	3.65581	0.140125	0.888561	NA
4933425L06Rik	11.9887	-0.185801	0.5241	-0.354514	0.722954	0.887431
4933427D06Rik	265.997	4.9379	0.277669	17.7834	9.50212e-71	7.7238e-67
4933427D14Rik	816.425	0.0582002	0.0851491	0.683509	0.494285	0.758543
4933427E11Rik	7.94921	0.0475724	0.572628	0.0830773	0.93379	0.975826
4933427E13Rik	0	NA	NA	NA	NA	NA
4933427G17Rik	52.1449	1.69109	0.347369	4.86827	1.12579e-06	3.78141e-05
4933427I22Rik	0.452412	-0.237983	3.59355	-0.066225	0.947199	NA
4933428C19Rik	0.313179	-1.62161	3.73027	-0.434717	0.663768	NA
4933428G20Rik	14.8365	-0.0269614	0.45757	-0.058923	0.953013	0.982528
4933429K18Rik	0.11439	0.512277	3.79876	0.134854	0.892728	NA
4933429O19Rik	0	NA	NA	NA	NA	NA
4933430H16Rik	0.399114	-1.01695	3.08739	-0.329387	0.741863	NA
4933430I17Rik	27.5833	0.0292529	0.32824	0.0891206	0.928986	0.973728
4933430M04Rik	0.0847751	0.512277	3.79876	0.134854	0.892728	NA
4933430N04Rik	0	NA	NA	NA	NA	NA
4933431E20Rik	422.442	-0.0609328	0.0932559	-0.653394	0.513503	0.77125
4933431G14Rik	5.06902	-1.25049	1.0314	-1.21242	0.225352	NA
4933432G23Rik	0.070741	-1.02659	3.79876	-0.270242	0.786974	NA
4933432I03Rik	0.556684	0.135981	2.3185	0.0586504	0.953231	NA
4933432I09Rik	2.42863	0.625147	1.04	0.601101	0.547773	NA
4933432K03Rik	0.520358	-0.641117	2.48972	-0.257506	0.796788	NA
4933433C11Rik	2.91141	0.0379189	0.841646	0.0450533	0.964065	NA
4933433F19Rik	0	NA	NA	NA	NA	NA
4933433G08Rik	0	NA	NA	NA	NA	NA
4933433G15Rik	24.9312	0.374802	0.41526	0.90257	0.366754	0.662381
4933433G19Rik	7.8973	0.90686	0.757885	1.19657	0.231476	0.536095
4933433H22Rik	0.261475	1.66296	3.77835	0.440129	0.659843	NA
4933434E20Rik	1613.81	-0.0834737	0.0588982	-1.41725	0.156409	0.444457
4933436E23Rik	0.216329	0.512274	3.79876	0.134853	0.892728	NA
4933436H12Rik	0.180485	-0.449511	3.79876	-0.118331	0.905806	NA
4933436I01Rik	0.0681962	0.512277	3.79876	0.134854	0.892728	NA
4933438B17Rik	3.14318	-0.230615	0.842064	-0.273869	0.784186	NA
4933438K21Rik	6.90291	0.247371	0.634302	0.389989	0.696545	0.873325
4933439C10Rik	427.796	0.00542614	0.0869886	0.0623776	0.950262	0.981508
4933439K11Rik	20.401	-0.292673	0.367244	-0.796944	0.425483	0.706762
4933440J02Rik	0.0839723	-0.0648009	3.79876	-0.0170584	0.98639	NA
4933440M02Rik	0.333456	0.610229	2.79053	0.218679	0.8269	NA
5031410I06Rik	64.753	-0.384254	0.242935	-1.58172	0.113714	0.374825
5031414D18Rik	6.44453	0.0837036	0.603785	0.138631	0.889741	NA
5031425E22Rik	378.923	-0.124845	0.10681	-1.16884	0.242467	0.548232
5031425F14Rik	1.84992	0.637669	1.27869	0.498689	0.617998	NA
5031426D15Rik	11.706	-0.214098	0.596482	-0.358935	0.719644	0.885487
5031434C07Rik	3.81456	-0.772012	0.868816	-0.88858	0.374229	NA
5031434O11Rik	20.3853	0.318341	0.357241	0.891109	0.372871	0.667301
5031439G07Rik	953.876	-0.0572923	0.0833204	-0.687615	0.491696	0.757103
5033403F01Rik	13.5346	-0.443024	0.487548	-0.908678	0.36352	0.660011
5033403H07Rik	0.179326	-0.449511	3.79876	-0.118331	0.905806	NA
5033404E19Rik	0.452648	1.64482	2.64474	0.621922	0.533993	NA
5033406O09Rik	41.1841	-0.27671	0.280172	-0.987645	0.323327	0.626349
5033428I22Rik	16.3932	-0.517303	0.395984	-1.30637	0.191426	0.491009
5330411J11Rik	2.55887	-1.58808	1.0122	-1.56894	0.116662	NA
5330413P13Rik	0.597562	-0.688439	2.05218	-0.335468	0.737272	NA
5330417C22Rik	2.71647	-0.426996	1.00756	-0.42379	0.671719	NA
5330426P16Rik	34.7436	-0.248232	0.283222	-0.876458	0.380781	0.673364
5330434G04Rik	0	NA	NA	NA	NA	NA
5330439B14Rik	0.275451	-1.50768	3.39552	-0.444021	0.657027	NA
5430401F13Rik	0.0681962	0.512277	3.79876	0.134854	0.892728	NA
5430402E10Rik	0.0847751	0.512277	3.79876	0.134854	0.892728	NA
5430402O13Rik	18.1331	0.548686	0.35927	1.52722	0.126705	0.399568
5430403N17Rik	1.14534	0.0982874	1.78801	0.0549704	0.956162	NA
5430405H02Rik	57.9407	0.0882113	0.212936	0.414262	0.678682	0.865395
5430416N02Rik	192.614	-0.131776	0.124504	-1.05841	0.28987	0.595528
5430416O09Rik	3.00326	-0.940944	0.856731	-1.0983	0.272075	NA
5430419D17Rik	0.070741	-1.02659	3.79876	-0.270242	0.786974	NA
5430421F17Rik	1.39615	2.21803	1.59352	1.3919	0.163951	NA
5430421N21Rik	0.432194	0.137751	2.68789	0.0512488	0.959127	NA
5430425K12Rik	0.182586	1.08045	3.79795	0.284483	0.77604	NA
5430427M07Rik	0.279299	-0.064806	3.79876	-0.0170598	0.986389	NA
5430427O19Rik	4.9984	0.424329	0.728321	0.582612	0.560154	NA
5430428K19Rik	0.11439	0.512277	3.79876	0.134854	0.892728	NA
5430431A17Rik	6.72116	2.13324	1.06099	2.01061	0.0443668	NA
5430434I15Rik	0	NA	NA	NA	NA	NA
5430437J10Rik	0.336764	-2.19869	3.73027	-0.589418	0.555581	NA
5430440P10Rik	0.994937	2.12055	1.8681	1.13513	0.256319	NA
5530400C23Rik	0	NA	NA	NA	NA	NA
5530401A14Rik	0	NA	NA	NA	NA	NA
5530601H04Rik	272.485	-0.0493103	0.20479	-0.240785	0.809722	0.923765
5730403I07Rik	1.31084	1.04531	1.43402	0.728933	0.466043	NA
5730405O15Rik	38.0305	-0.139371	0.242855	-0.573886	0.566045	0.805584
5730408K05Rik	92.6349	-0.258366	0.207032	-1.24795	0.21205	0.514292
5730409E04Rik	351.308	-0.0563015	0.0971492	-0.579536	0.562227	0.802893
5730412P04Rik	0.11439	0.512277	3.79876	0.134854	0.892728	NA
5730416F02Rik	6.31327	-0.0107982	0.622843	-0.0173369	0.986168	NA
5730420D15Rik	7.11816	-0.334904	0.710969	-0.471053	0.637603	0.843463
5730422E09Rik	6.32747	-0.396053	0.601577	-0.658359	0.510308	NA
5730435O14Rik	1.22537	3.20456	1.65239	1.93934	0.0524598	NA
5730455P16Rik	765.329	-0.0655833	0.0799618	-0.820182	0.412112	0.695588
5730457N03Rik	44.2801	1.31786	0.362695	3.63352	0.000279578	0.00441809
5730460C07Rik	2.83481	-0.299458	0.974463	-0.307305	0.758611	NA
5730480H06Rik	102.309	-0.0422649	0.157201	-0.268859	0.788038	0.915746
5730488B01Rik	0	NA	NA	NA	NA	NA
5730507C01Rik	168.986	0.181155	0.130525	1.3879	0.165168	0.456266
5730508B09Rik	257.711	0.725285	0.145548	4.98312	6.25679e-07	2.27811e-05
5730522E02Rik	9.57266	0.349296	0.466655	0.748509	0.454153	0.728482
5730559C18Rik	98.8247	-0.186546	0.185507	-1.0056	0.314607	0.618373
5830411N06Rik	17.4946	-0.180248	0.359145	-0.501881	0.615751	0.83405
5830415F09Rik	334.451	0.030327	0.114508	0.264846	0.791128	0.916378
5830416I19Rik	0.758887	-0.449518	2.11423	-0.212616	0.831627	NA
5830416P10Rik	21.1384	-0.498363	0.385073	-1.2942	0.195595	0.495911
5830417I10Rik	3301.81	0.224151	0.154173	1.4539	0.145975	0.429523
5830418P13Rik	17.2306	0.71521	0.445253	1.6063	0.108208	0.364472
5830428M24Rik	0.986396	2.03659	1.74186	1.1692	0.242322	NA
5830432E09Rik	5.84748	-0.50511	0.70906	-0.712366	0.476238	NA
5830444B04Rik	10.0266	-0.548626	0.616624	-0.889726	0.373613	0.667967
5830454E08Rik	40.5313	-0.0783267	0.292443	-0.267836	0.788825	0.916116
5830473C10Rik	1.46613	-0.134737	1.36322	-0.0988377	0.921267	NA
5930403L14Rik	6.77017	-0.890138	0.595375	-1.49509	0.134892	NA
5930412G12Rik	59.0395	-0.580469	0.241766	-2.40096	0.0163523	0.108373
5930430L01Rik	53.4094	-0.108835	0.248248	-0.438413	0.661087	0.856358
5930438M14Rik	0.510739	-0.104132	2.27312	-0.0458104	0.963461	NA
6030407O03Rik	17.4143	-0.483872	0.401005	-1.20665	0.227568	0.531089
6030408B16Rik	366.7	-0.078876	0.125301	-0.629493	0.529026	0.783539
6030419C18Rik	591.609	-0.0529542	0.098999	-0.534896	0.592722	0.820913
6030440G07Rik	10.1697	0.146188	0.513552	0.284662	0.775903	0.910927
6030443J06Rik	46.1282	-0.164545	0.284822	-0.577713	0.563458	0.803554
6030458C11Rik	1430.86	0.0288999	0.0887604	0.325595	0.744731	0.896954
6030466F02Rik	30.1719	-0.0807971	0.280024	-0.288536	0.772936	0.909893
6030468B19Rik	61.9526	-1.05895	0.471192	-2.24739	0.0246148	0.145355
6030469F06Rik	23.7785	-0.180914	0.354903	-0.509757	0.610222	0.831521
6030471H07Rik	3.55226	-0.048937	0.840438	-0.0582279	0.953567	NA
6030498E09Rik	28.7433	-0.224971	0.349257	-0.644143	0.519483	0.77604
6230400D17Rik	59.1961	-0.0929214	0.205856	-0.451391	0.651708	0.851098
6330403A02Rik	931.016	-0.129146	0.13892	-0.929647	0.352554	0.650488
6330403K07Rik	936.723	-0.20047	0.130165	-1.54013	0.123529	0.393073
6330407A03Rik	0.0945505	-1.02659	3.79876	-0.270242	0.786974	NA
6330408A02Rik	550.235	1.22241	0.18721	6.52964	6.59272e-11	5.41302e-09
6330409D20Rik	4.29885	0.551062	0.777969	0.708334	0.478738	NA
6330410L21Rik	1.37078	-1.00067	1.32907	-0.752909	0.451504	NA
6330415B21Rik	0.337034	-1.23718	2.75854	-0.448491	0.653799	NA
6330415G19Rik	53.4385	0.197035	0.23722	0.830599	0.4062	0.69146
6330416G13Rik	212.538	-0.0367998	0.113071	-0.325456	0.744836	0.897014
6330418K02Rik	45.8217	0.213435	0.239988	0.88936	0.37381	0.668245
6330549D23Rik	295.919	-0.188718	0.106156	-1.77775	0.0754456	0.297842
6430411K18Rik	0	NA	NA	NA	NA	NA
6430503K07Rik	0.644725	0.135454	2.2328	0.0606655	0.951626	NA
6430531B16Rik	40.2881	0.0635911	0.252557	0.25179	0.801204	0.920425
6430548M08Rik	312.458	0.923323	0.155985	5.91931	3.23286e-09	1.91529e-07
6430550D23Rik	50.9985	0.247547	0.226549	1.09268	0.274532	0.580983
6430562O15Rik	18.0513	-0.494408	0.392665	-1.25911	0.207991	0.510002
6430571L13Rik	37.61	-0.0824457	0.255239	-0.323013	0.746685	0.897851
6430573F11Rik	96.4503	0.015176	0.195869	0.0774805	0.938241	0.977944
6430584L05Rik	8.21454	0.421936	0.553518	0.762282	0.445892	0.722142
6430706D22Rik	0	NA	NA	NA	NA	NA
6430710C18Rik	95.1658	-0.150477	0.180463	-0.833841	0.404371	0.690169
6530402F18Rik	53.6555	-0.103706	0.29253	-0.354515	0.722953	0.887431
6530403H02Rik	0.19649	-1.02659	3.79876	-0.270243	0.786973	NA
6530411M01Rik	5.16039	-1.65683	0.808409	-2.04949	0.0404138	NA
6720468P15Rik	122.128	-0.0356002	0.158182	-0.225059	0.821934	0.928687
6720483E21Rik	21.7565	-0.403634	0.316082	-1.27699	0.201605	0.502761
6720489N17Rik	415.486	0.00684175	0.0975879	0.0701086	0.944107	0.979477
6820408C15Rik	39.0215	0.0695403	0.240972	0.288582	0.772901	0.909893
6820431F20Rik	6611.59	-0.179827	0.0941284	-1.91044	0.0560768	0.248471
7420426K07Rik	3.48973	-1.01035	0.997547	-1.01284	0.311138	NA
7420461P10Rik	1.77572	-0.590979	1.0974	-0.538529	0.590212	NA
7420700N18Rik	0.152168	0.512274	3.79876	0.134853	0.892728	NA
7420701I03Rik	0	NA	NA	NA	NA	NA
7530416G11Rik	0.296976	1.79689	3.7719	0.47639	0.633797	NA
7630403G23Rik	0	NA	NA	NA	NA	NA
8030411F24Rik	8.21751	-0.208282	0.530034	-0.39296	0.694349	0.872022
8030423F21Rik	14.1283	0.168402	0.423103	0.398017	0.690618	0.869587
8030423J24Rik	2.84711	-0.312865	0.989533	-0.316174	0.75187	NA
8030442B05Rik	0	NA	NA	NA	NA	NA
8030443G20Rik	0.28149	0.512272	3.427	0.149481	0.881174	NA
8030451O07Rik	0.175541	1.10224	3.79763	0.290243	0.77163	NA
8030455M16Rik	6.07497	-0.633088	0.692121	-0.914707	0.360345	NA
8030462N17Rik	378.952	0.362069	0.187886	1.92706	0.053972	0.242048
8430408G22Rik	95.3772	-0.222279	0.215293	-1.03245	0.301861	0.607572
8430419L09Rik	954.305	0.0395778	0.0923015	0.428788	0.668078	0.85966
8430422H06Rik	0	NA	NA	NA	NA	NA
8430423G03Rik	0.621837	-0.852302	1.77742	-0.479516	0.631572	NA
8430426J06Rik	1.8654	0.344147	1.11526	0.308579	0.757642	NA
8430429K09Rik	201.889	0.282594	0.129945	2.17472	0.0296514	0.164246
8430430B14Rik	0.187874	0.512274	3.79876	0.134853	0.892728	NA
8430431K14Rik	0	NA	NA	NA	NA	NA
8430436N08Rik	1.17162	-0.483067	1.32091	-0.365709	0.714582	NA
8430437L04Rik	8.45629	0.0320676	0.607927	0.052749	0.957932	0.983958
9030025P20Rik	678.156	-0.010003	0.108407	-0.0922733	0.926481	0.972922
9030204H09Rik	0	NA	NA	NA	NA	NA
9030404E10Rik	0.43901	0.137664	2.66595	0.051638	0.958817	NA
9030612E09Rik	44.9237	-0.126563	0.247083	-0.51223	0.60849	0.830807
9030617O03Rik	105.478	-0.0806685	0.157873	-0.510971	0.609371	0.831156
9030619P08Rik	0.240742	1.57391	3.54706	0.443722	0.657243	NA
9030624G23Rik	124.393	-0.0596666	0.16259	-0.366975	0.713637	0.881625
9030624J02Rik	1391.36	0.0702782	0.0651158	1.07928	0.280463	0.585693
9030625G05Rik	15.566	-1.1148	0.423547	-2.63207	0.00848671	0.0681326
9130008F23Rik	30.9998	0.13939	0.354211	0.393522	0.693934	0.871883
9130011E15Rik	419.226	0.11579	0.0882679	1.3118	0.189586	0.488834
9130015A21Rik	2.20746	0.327918	1.00854	0.325143	0.745073	NA
9130015L21Rik	0.0945505	-1.02659	3.79876	-0.270242	0.786974	NA
9130019O22Rik	384.838	-0.105823	0.0951742	-1.11189	0.266186	0.571718
9130019P16Rik	10.4595	-0.875487	0.474765	-1.84404	0.0651767	0.272721
9130023H24Rik	267.599	0.391905	0.106214	3.68976	0.000224465	0.0037427
9130024F11Rik	16.5182	0.190322	0.464454	0.409776	0.68197	0.866833
9130204L05Rik	0	NA	NA	NA	NA	NA
9130209A04Rik	0	NA	NA	NA	NA	NA
9130221F21Rik	0.332882	0.107389	3.28814	0.0326595	0.973946	NA
9130221H12Rik	316.839	0.0559182	0.128698	0.434492	0.663931	0.857718
9130227L01Rik	0.348222	0.13943	3.24577	0.0429575	0.965735	NA
9130230L23Rik	4.22199	-1.70819	0.849472	-2.01088	0.0443382	NA
9130401M01Rik	1235.63	-0.289736	0.0899913	-3.21959	0.00128372	0.0154703
9130409I23Rik	4.80836	0.442114	0.874778	0.505401	0.613277	NA
9130409J20Rik	0.199125	0.512274	3.79876	0.134853	0.892728	NA
9230009I02Rik	0.0681962	0.512277	3.79876	0.134854	0.892728	NA
9230102K24Rik	7.02488	-0.827915	0.545111	-1.5188	0.128813	0.403178
9230102O04Rik	4.89479	-0.255011	0.64367	-0.396182	0.691971	NA
9230104L09Rik	0.981124	-0.362134	1.5123	-0.239459	0.81075	NA
9230105E05Rik	2.04387	0.886696	1.13806	0.779127	0.435905	NA
9230110C19Rik	316.566	-0.0912502	0.114155	-0.799357	0.424083	0.705253
9230110F15Rik	0	NA	NA	NA	NA	NA
9230112D13Rik	0.639579	1.42642	1.99826	0.713832	0.475331	NA
9230112J17Rik	2.26012	0.00867467	1.09218	0.00794251	0.993663	NA
9230114K14Rik	23.0765	0.569664	0.366212	1.55556	0.119814	0.386394
9230116L04Rik	4.03476	-0.249185	0.816906	-0.305035	0.76034	NA
9230116N13Rik	56.3507	0.103478	0.212392	0.487201	0.626116	0.837897
9230117E06Rik	0.962389	-1.63516	1.60257	-1.02033	0.30757	NA
9330020H09Rik	148.921	-0.0148394	0.148214	-0.100122	0.920248	0.970266
9330102E08Rik	256.906	0.411347	0.167239	2.45963	0.013908	0.097312
9330111N05Rik	0.179326	-0.449511	3.79876	-0.118331	0.905806	NA
9330117O12Rik	0.660786	-0.274683	2.32535	-0.118125	0.905968	NA
9330133O14Rik	308.662	0.0637921	0.105037	0.607331	0.543631	0.793191
9330136K24Rik	39.7755	-0.150484	0.244691	-0.614995	0.538558	0.78952
9330151L19Rik	420.179	0.07298	0.0980291	0.744472	0.456591	0.730734
9330158H04Rik	0.698105	1.21291	2.03569	0.595823	0.551294	NA
9330159F19Rik	29.4676	-0.0230577	0.30918	-0.0745771	0.940551	0.978407
9330159M07Rik	101.17	-0.17081	0.172445	-0.99052	0.32192	0.624932
9330162012Rik	31.8211	0.253755	0.283934	0.893711	0.371476	0.666117
9330162B11Rik	0	NA	NA	NA	NA	NA
9330175E14Rik	0.4111	0.904996	3.11832	0.290219	0.771649	NA
9330175M20Rik	0.856577	0.26352	1.71269	0.153863	0.877718	NA
9330178D15Rik	0.0839723	-0.0648009	3.79876	-0.0170584	0.98639	NA
9330179D12Rik	11.6661	0.543885	0.45674	1.1908	0.233734	0.539052
9330182L06Rik	50.3704	0.0614803	0.238563	0.257711	0.79663	0.918497
9330182O14Rik	0	NA	NA	NA	NA	NA
9330188P03Rik	0.857297	1.08933	2.19825	0.495544	0.620216	NA
9330199G10Rik	0.199165	1.10224	3.79763	0.290243	0.77163	NA
9430007A20Rik	0	NA	NA	NA	NA	NA
9430014N10Rik	0	NA	NA	NA	NA	NA
9430015G10Rik	1592.17	0.383393	0.108507	3.53335	0.000410325	0.00609753
9430016H08Rik	545.801	-0.0852474	0.0828726	-1.02866	0.303642	0.60927
9430018G01Rik	4.87594	-0.114756	0.658937	-0.174153	0.861745	NA
9430019J16Rik	0	NA	NA	NA	NA	NA
9430020K01Rik	1741.44	0.0808026	0.0946178	0.85399	0.39311	0.682367
9430021M05Rik	3.01845	0.800914	0.983763	0.814132	0.415569	NA
9430037G07Rik	87.1502	-0.424287	0.245667	-1.72708	0.0841533	0.317345
9430038I01Rik	289.21	-0.0383717	0.115663	-0.331753	0.740076	0.895897
9430041J12Rik	7.39975	-0.731095	0.5861	-1.24739	0.212255	0.514558
9430060I03Rik	10.807	0.58073	0.480524	1.20853	0.226842	0.530643
9430065F17Rik	36.0072	1.07113	0.294314	3.6394	0.000273271	0.00433937
9430069I07Rik	0.572355	1.1693	2.24897	0.519926	0.603115	NA
9430076C15Rik	2.76151	0.455457	1.00245	0.454344	0.649581	NA
9430078K24Rik	69.3991	-0.230522	0.197515	-1.16711	0.243166	0.549048
9430083A17Rik	74.0155	-0.266874	0.190307	-1.40233	0.160816	0.450136
9430091E24Rik	180.915	0.338086	0.123134	2.74568	0.00603862	0.0527795
9530002B09Rik	0	NA	NA	NA	NA	NA
9530003J23Rik	0.112704	-1.02659	3.79876	-0.270242	0.786974	NA
9530014B07Rik	0	NA	NA	NA	NA	NA
9530020I12Rik	1.22901	0.0788976	1.42921	0.0552036	0.955976	NA
9530026F06Rik	0.517784	-0.133929	2.06304	-0.0649181	0.948239	NA
9530026P05Rik	18.8901	-0.290301	0.366479	-0.792135	0.428282	0.708762
9530027J09Rik	30.3293	-0.169961	0.310487	-0.547401	0.584104	0.815855
9530036O11Rik	4.12782	0.00931514	0.761811	0.0122276	0.990244	NA
9530051G07Rik	34.3355	0.204859	0.327541	0.625444	0.53168	0.785346
9530052E02Rik	2.34672	0.342721	1.10104	0.311271	0.755594	NA
9530053A07Rik	5.88549	0.440395	0.689322	0.638881	0.5229	NA
9530059O14Rik	0.152971	1.08045	3.79795	0.284483	0.77604	NA
9530062K07Rik	16.7354	-0.790937	0.3736	-2.11707	0.034254	0.18086
9530068E07Rik	3737.92	-0.0320079	0.0803747	-0.398233	0.690458	0.869587
9530077C05Rik	180.358	0.0974177	0.143649	0.678165	0.497667	0.760837
9530080O11Rik	14.7856	-0.313201	0.432811	-0.723642	0.469285	0.740103
9530082P21Rik	688.84	-0.0945891	0.126486	-0.747821	0.454568	0.728788
9530091C08Rik	11.2597	-0.382459	0.472852	-0.808834	0.418611	0.701062
9630001P10Rik	25.9085	-0.00757644	0.28347	-0.0267275	0.978677	0.992041
9630013A20Rik	0	NA	NA	NA	NA	NA
9630013K17Rik	10.5994	0.0975582	0.602209	0.162001	0.871305	0.950684
9630028B13Rik	1.98106	-0.499641	0.955983	-0.522646	0.601221	NA
9630028H03Rik	0.522319	1.34785	2.47854	0.543807	0.586574	NA
9630028I04Rik	84.1031	0.129333	0.255394	0.506405	0.612573	0.832454
9830107B12Rik	2.01854	0.312038	1.25474	0.248686	0.803603	NA
9830132P13Rik	2.52445	0.531289	1.04528	0.508276	0.61126	NA
9830147E19Rik	696.144	0.0481525	0.130937	0.367752	0.713058	0.881267
9830166K06Rik	8.54873	-0.230568	0.591033	-0.390111	0.696455	0.873295
9930012K11Rik	225.503	-0.0358694	0.111472	-0.321779	0.74762	0.898371
9930014A18Rik	118.707	-0.113037	0.15924	-0.709854	0.477795	0.747076
9930021J03Rik	1812.99	0.182114	0.140025	1.30058	0.193402	0.493235
9930104L06Rik	610.226	0.065823	0.0896442	0.73427	0.462784	0.735721
9930111H07Rik	0.0945505	-1.02659	3.79876	-0.270242	0.786974	NA
9930111J21Rik1	1.93527	0.143555	1.10968	0.129367	0.897068	NA
9930111J21Rik2	4.59921	-0.506994	0.929933	-0.545194	0.58562	NA
A130010J15Rik	384.768	0.563102	0.135043	4.16979	3.04878e-05	0.000690306
A130077B15Rik	0.915991	1.93163	1.92982	1.00094	0.316856	NA
A1bg	58.2943	0.100179	0.204773	0.489218	0.624687	0.837278
A1cf	2.02882	2.4561	1.39805	1.75681	0.0789508	NA
A230001M10Rik	0.198639	-0.449511	3.79876	-0.118331	0.905806	NA
A230009B12Rik	0.883197	-0.861556	1.83874	-0.468557	0.639387	NA
A230020J21Rik	8.77409	0.38171	0.575752	0.662977	0.507345	0.766606
A230028O05Rik	7.69998	0.162293	0.540583	0.300219	0.76401	0.907249
A230046K03Rik	1455.25	-0.0832284	0.135069	-0.616194	0.537767	0.789032
A230050P20Rik	149.519	-0.337363	0.179045	-1.88424	0.0595323	0.258844
A230056J06Rik	5.35558	0.559946	0.647517	0.864758	0.387172	NA
A230056P14Rik	52.5984	-0.263826	0.224154	-1.17699	0.239201	0.544611
A230057D06Rik	199.556	-0.112242	0.113086	-0.992535	0.320937	0.624024
A230065H16Rik	148.623	-0.175267	0.148981	-1.17644	0.239419	0.544749
A230070E04Rik	1.83869	0.101259	1.23213	0.0821819	0.934502	NA
A230072C01Rik	378.7	0.0478987	0.110478	0.43356	0.664608	0.858059
A230072E10Rik	4.06475	0.924489	0.808199	1.14389	0.25267	NA
A230077H06Rik	16.7229	0.560297	0.381691	1.46794	0.142122	0.423707
A230103J11Rik	110.316	-0.31078	0.231916	-1.34006	0.180227	0.477164
A230108P19Rik	7.02016	0.750396	0.566178	1.32537	0.185048	0.482552
A2m	29.5025	-0.0112724	0.375861	-0.029991	0.976074	0.991071
A330009N23Rik	35.6972	0.16887	0.308489	0.547409	0.584098	0.815855
A330015K06Rik	3.76264	-0.762347	0.817233	-0.932839	0.350903	NA
A330023F24Rik	218.708	0.679058	0.204679	3.31768	0.000907694	0.0117114
A330032B11Rik	0.962749	1.11009	1.70749	0.650129	0.515609	NA
A330033J07Rik	17.6844	-0.200111	0.371092	-0.539248	0.589716	0.819053
A330035P11Rik	66.0987	0.350981	0.195373	1.79647	0.0724205	0.291377
A330040F15Rik	9.59156	0.110002	0.5112	0.215184	0.829624	0.932016
A330041J22Rik	19.6713	-0.366027	0.358166	-1.02195	0.306805	0.611842
A330048O09Rik	7.54557	-0.17562	0.756595	-0.232119	0.816445	0.926507
A330049N07Rik	0.425851	1.08186	2.6625	0.406332	0.684499	NA
A330050F15Rik	1.07	0.586514	1.43945	0.407457	0.683672	NA
A330069E16Rik	40.3662	0.858999	0.255911	3.35664	0.000788971	0.0104529
A330070K13Rik	0.200324	1.10224	3.79763	0.290243	0.77163	NA
A330074K22Rik	14.4171	-0.255398	0.442297	-0.577437	0.563645	0.803554
A330076C08Rik	74.6957	-0.291654	0.184736	-1.57876	0.114391	0.375963
A330076H08Rik	74.0631	-0.0276341	0.18214	-0.151719	0.879408	0.954039
A330093E20Rik	18.0992	-0.00347883	0.378427	-0.00919287	0.992665	0.997328
A330102I10Rik	4.02754	-0.484262	0.723365	-0.669457	0.503204	NA
A3galt2	31.2621	-0.0162844	0.275753	-0.0590541	0.952909	0.982523
A430005L14Rik	1116.07	0.299354	0.0819106	3.65465	0.000257534	0.00417837
A430033K04Rik	260.107	-0.357705	0.17747	-2.01558	0.0438437	0.211682
A430035B10Rik	21.1024	0.349905	0.336344	1.04032	0.298191	0.603848
A430046D13Rik	204.995	0.673429	0.158622	4.24549	2.18116e-05	0.000519166
A430078G23Rik	42.6677	-0.463138	0.299124	-1.54831	0.121547	0.389661
A430078I02Rik	16.8378	0.494156	0.478031	1.03373	0.301261	0.607089
A430085M09Rik	0.0877705	0.512277	3.79876	0.134854	0.892728	NA
A430088P11Rik	0.719478	-0.167131	1.79177	-0.0932772	0.925683	NA
A430089I19Rik	0	NA	NA	NA	NA	NA
A430090L17Rik	19.9177	-0.445806	0.341107	-1.30694	0.191233	0.49079
A430093F15Rik	6.4116	-0.08036	0.613379	-0.131012	0.895766	NA
A430105I19Rik	247.593	-0.0187177	0.153876	-0.121641	0.903183	0.964728
A4galt	100.658	0.0953678	0.168648	0.565484	0.571745	0.809374
A4gnt	0.0839723	-0.0648009	3.79876	-0.0170584	0.98639	NA
A530006G24Rik	0	NA	NA	NA	NA	NA
A530013C23Rik	1.03059	-0.0872418	1.54974	-0.0562945	0.955107	NA
A530016L24Rik	41.3096	0.0863646	0.256602	0.33657	0.736441	0.893556
A530032D15Rik	40.4362	0.134674	0.267399	0.503644	0.614512	0.832996
A530046M15Rik	0.195327	-0.0648041	3.79876	-0.0170593	0.986389	NA
A530050N04Rik	0.0859343	0.512277	3.79876	0.134854	0.892728	NA
A530053G22Rik	0	NA	NA	NA	NA	NA
A530058N18Rik	0.34339	0.138168	2.80067	0.0493338	0.960653	NA
A530064D06Rik	4.99091	0.663498	0.750516	0.884056	0.376666	NA
A530065N20Rik	0.070741	-1.02659	3.79876	-0.270242	0.786974	NA
A530072M11Rik	24.5683	0.237248	0.306644	0.773692	0.439113	0.717453
A530088E08Rik	2.07726	0.0468867	0.989834	0.0473683	0.96222	NA
A530099J19Rik	0.199165	1.10224	3.79763	0.290243	0.77163	NA
A630001G21Rik	62.8652	0.108771	0.251291	0.432848	0.665126	0.858102
A630010A05Rik	0	NA	NA	NA	NA	NA
A630012P03Rik	0.664097	0.153433	1.82424	0.0841078	0.932971	NA
A630019I02Rik	0.155516	-0.449511	3.79876	-0.118331	0.905806	NA
A630020A06	6.2457	1.36076	0.759574	1.79148	0.0732166	NA
A630023A22Rik	2.25004	-1.04863	1.0734	-0.976927	0.328605	NA
A630023P12Rik	0.783644	-0.132526	1.90032	-0.069739	0.944401	NA
A630033H20Rik	10.3366	0.351219	0.563394	0.623399	0.533022	0.786118
A630066F11Rik	68.0648	0.126231	0.217118	0.581393	0.560975	0.802444
A630072M18Rik	193.439	0.0760756	0.14099	0.53958	0.589487	0.81901
A630073D07Rik	0.318488	0.107298	3.33222	0.0322003	0.974312	NA
A630075F10Rik	15.6859	-0.449241	0.411544	-1.0916	0.275009	0.581074
A630076J17Rik	2.11586	0.527411	1.30121	0.405324	0.685239	NA
A630077J23Rik	0.112704	-1.02659	3.79876	-0.270242	0.786974	NA
A630089N07Rik	60.7624	-0.139026	0.3909	-0.355656	0.722098	0.886986
A630095E13Rik	0	NA	NA	NA	NA	NA
A630095N17Rik	1.58259	0.355556	1.17633	0.302259	0.762455	NA
A730004F24Rik	0.701363	-1.59409	2.79534	-0.570266	0.568497	NA
A730006G06Rik	0	NA	NA	NA	NA	NA
A730008H23Rik	3.05349	-0.496092	0.948931	-0.52279	0.60112	NA
A730017C20Rik	358.521	-0.0590484	0.12223	-0.483094	0.629029	0.839377
A730017L22Rik	223.824	-0.000796837	0.111999	-0.00711469	0.994323	0.997833
A730018C14Rik	0.407608	-0.342043	2.63229	-0.129941	0.896613	NA
A730020E08Rik	14.1503	1.17778	0.43004	2.73877	0.00616697	0.0536417
A730020M07Rik	5.47051	-0.0477819	0.620727	-0.0769773	0.938642	NA
A730036I17Rik	6.31612	-0.520062	0.674211	-0.771364	0.440491	NA
A730043L09Rik	0.979753	2.21344	1.89135	1.1703	0.241882	NA
A730046J19Rik	39.946	-0.25454	0.266322	-0.95576	0.339193	0.639651
A730056A06Rik	18.0383	-0.593318	0.355613	-1.66844	0.0952291	0.341605
A730082K24Rik	0.895909	-1.4244	1.89185	-0.752915	0.451501	NA
A730085K08Rik	0	NA	NA	NA	NA	NA
A730090H04Rik	22.2848	0.233285	0.340873	0.684376	0.493738	0.758224
A730090N16Rik	31.4623	-0.0694506	0.281146	-0.247027	0.804888	0.921619
A830009L08Rik	2.97587	0.609986	1.02797	0.593389	0.552921	NA
A830010M20Rik	452.121	0.196712	0.11523	1.70712	0.0878001	0.326181
A830011K09Rik	16.3096	-0.233834	0.407276	-0.574141	0.565873	0.805551
A830018L16Rik	29.1075	0.536252	0.373077	1.43738	0.150611	0.436761
A830019L24Rik	0	NA	NA	NA	NA	NA
A830052D11Rik	12.8379	-0.263925	0.420117	-0.628217	0.529862	0.783887
A830080D01Rik	1546.33	0.13346	0.17715	0.753371	0.451227	0.726193
A830082K12Rik	36.6339	-0.162625	0.25458	-0.638798	0.522955	0.778288
A830082N09Rik	137.251	-0.260044	0.194297	-1.33839	0.180769	0.477756
A930001A20Rik	0.963323	-0.519085	1.58	-0.328535	0.742507	NA
A930001C03Rik	12.3485	0.561002	0.460995	1.21694	0.223628	0.527806
A930002C04Rik	3.16747	1.20521	1.03576	1.1636	0.244585	NA
A930003A15Rik	0.711162	2.58533	2.48291	1.04125	0.297759	NA
A930003O13Rik	1.44706	-0.582812	1.11863	-0.521005	0.602363	NA
A930004D18Rik	178.947	-0.0410327	0.155447	-0.263965	0.791807	0.916591
A930005H10Rik	66.28	-0.200476	0.192181	-1.04316	0.296875	0.602772
A930006I01Rik	0	NA	NA	NA	NA	NA
A930006K02Rik	95.9322	-0.373957	0.165299	-2.26231	0.0236784	0.140723
A930007I19Rik	25.6024	-0.254727	0.349399	-0.729044	0.465975	0.738266
A930009A15Rik	1.35075	-0.438836	1.23603	-0.355036	0.722563	NA
A930011G23Rik	0.563903	-1.84389	2.14366	-0.860159	0.389701	NA
A930012L18Rik	13.3224	0.0329304	0.416239	0.0791143	0.936942	0.977216
A930013F10Rik	136.465	-0.259659	0.326384	-0.795562	0.426287	0.707033
A930015D03Rik	36.9218	-0.0888775	0.2472	-0.359537	0.719193	0.885283
A930016O22Rik	2.04647	-0.91785	1.12501	-0.815859	0.414581	NA
A930017M01Rik	13.371	0.0958896	0.421044	0.227742	0.819846	0.928021
A930018P22Rik	5.07867	-0.506239	0.722823	-0.700364	0.4837	NA
A930019D19Rik	1.63851	1.33643	1.4195	0.941478	0.34646	NA
A930024E05Rik	151.149	-0.260882	0.131881	-1.97816	0.0479103	0.223558
A930031H19Rik	0.138937	-0.449511	3.79876	-0.118331	0.905806	NA
A930041C12Rik	14.6353	0.303474	0.40984	0.74047	0.459015	0.732856
AA387883	1.08569	-0.0652197	1.4731	-0.0442738	0.964686	NA
AA388235	87.3142	-0.151064	0.170873	-0.884075	0.376656	0.670165
AA413626	9.63	0.494987	0.563221	0.87885	0.379482	0.672373
AA414768	763.712	-0.13115	0.0884301	-1.48309	0.138051	0.417777
AA415398	128.965	0.414723	0.15205	2.72754	0.00638091	0.0548859
AA465934	46.9643	-0.0773721	0.229991	-0.336414	0.736559	0.893556
AA467197	13.403	-0.21661	0.439561	-0.492787	0.622163	0.836685
AA474331	87.821	-0.372193	0.339232	-1.09716	0.272571	0.578635
AA536875	0.239488	-0.449514	3.5805	-0.125545	0.900092	NA
AA543186	46.2327	-0.00456773	0.243161	-0.0187848	0.985013	0.994556
AA543401	0	NA	NA	NA	NA	NA
AA545190	0	NA	NA	NA	NA	NA
AA619741	4.20285	0.187627	0.851447	0.220362	0.825589	NA
AA792892	0.112704	-1.02659	3.79876	-0.270242	0.786974	NA
AA986860	37.7862	0.0389013	0.284867	0.136559	0.891379	0.959107
AB124611	40.9431	-0.0203446	0.262014	-0.0776469	0.938109	0.977931
AF067061	0.0847751	0.512277	3.79876	0.134854	0.892728	NA
AF067063	0	NA	NA	NA	NA	NA
AF251705	27.74	-0.500117	0.298102	-1.67767	0.0934118	0.337965
AF357355	0.493201	-0.802511	2.55751	-0.313786	0.753683	NA
AF357359	0	NA	NA	NA	NA	NA
AF357399	8.02941	0.59086	0.609936	0.968724	0.332683	0.634345
AF357425	0.40755	-2.19756	3.03256	-0.724654	0.468664	NA
AF357426	0.564128	-1.35569	1.95904	-0.692014	0.488928	NA
AF366264	6.2718	0.914493	0.630095	1.45136	0.14668	NA
AF529169	3.66355	0.200905	0.862552	0.232919	0.815824	NA
AI115009	6.14353	-0.00100995	0.61863	-0.00163256	0.998697	NA
AI118078	9.53269	-0.808163	0.575127	-1.40519	0.159964	0.448695
AI182371	36.9253	0.826649	0.30544	2.70642	0.00680121	0.057573
AI197445	7.74964	0.0211303	0.673788	0.0313605	0.974982	0.991014
AI314180	2428.09	0.0697455	0.135723	0.513881	0.607335	0.83012
AI314278	0.62927	2.03759	2.45942	0.828484	0.407396	NA
AI317395	49.3529	0.0898914	0.228956	0.392614	0.694605	0.872051
AI413582	90.356	-0.146066	0.190746	-0.765763	0.443817	0.721011
AI414108	229.924	0.0605496	0.164598	0.367863	0.712975	0.881231
AI427809	142.071	0.111031	0.132913	0.835366	0.403512	0.689843
AI429214	107.065	-0.0468082	0.167074	-0.280164	0.779352	0.912902
AI450353	121.98	0.176893	0.153735	1.15063	0.249883	0.556025
AI463170	3.96749	-1.14203	0.832951	-1.37106	0.170356	NA
AI464131	136.851	-0.197936	0.159697	-1.23945	0.21518	0.518094
AI467606	67.6037	0.1015	0.210736	0.481644	0.630059	0.839649
AI504432	34.3002	0.279424	0.359918	0.776355	0.437539	0.716322
AI506816	10.8459	-0.868072	0.497727	-1.74407	0.0811463	0.311425
AI507597	6.60786	0.187255	0.605548	0.309232	0.757145	NA
AI593442	5.38043	-0.407165	0.734512	-0.554334	0.57935	NA
AI597479	1106.87	0.0269664	0.0897305	0.300526	0.763776	0.907249
AI606473	0.569146	-0.0861149	3.40273	-0.0253076	0.97981	NA
AI607873	40.7659	-0.465517	0.282552	-1.64755	0.099446	0.349178
AI646519	0	NA	NA	NA	NA	NA
AI661453	232.389	0.0227225	0.131158	0.173246	0.862458	0.947408
AI662270	147.494	-0.134042	0.655214	-0.204577	0.837902	0.935241
AI837181	950.533	0.0143326	0.118311	0.121144	0.903577	0.964773
AI839979	11.9765	-0.411707	0.477252	-0.86266	0.388324	0.6794
AI846148	1032.8	0.0675499	0.0896638	0.753369	0.451228	0.726193
AI847159	1.92868	-0.535066	1.04374	-0.512645	0.6082	NA
AI854517	205.487	-0.0353444	0.171666	-0.20589	0.836877	0.93486
AI854703	67.2567	-0.360728	0.215847	-1.67122	0.0946779	0.34028
AI987944	477.757	-0.0219679	0.100195	-0.219252	0.826454	0.931092
AK010878	175.811	0.121752	0.126286	0.96409	0.335001	0.635782
AU015228	59.5152	-0.0161003	0.291719	-0.0551913	0.955986	0.983273
AU015791	2.791	-0.888803	0.927559	-0.958217	0.337953	NA
AU015836	1643.06	-0.695499	0.26681	-2.60672	0.00914152	0.0719331
AU016765	0	NA	NA	NA	NA	NA
AU018091	60.9998	-0.353844	0.254659	-1.38948	0.164686	0.455725
AU019823	1410.68	-0.105907	0.086377	-1.2261	0.220161	0.52408
AU019990	1.50781	-0.134988	1.49782	-0.0901231	0.928189	NA
AU021063	0	NA	NA	NA	NA	NA
AU021092	69.4387	-0.278135	0.221596	-1.25514	0.209428	0.511817
AU022252	229.227	-0.219229	0.127825	-1.71507	0.0863325	0.322671
AU022751	350.473	0.747292	0.184793	4.04394	5.25608e-05	0.0011126
AU022754	1.09268	0.551806	1.72868	0.319207	0.74957	NA
AU022793	3.48014	0.0224613	0.929144	0.0241742	0.980714	NA
AU023762	0.686691	-0.794679	2.01533	-0.394317	0.693347	NA
AU040320	697.188	0.489693	0.0965085	5.07409	3.89357e-07	1.47892e-05
AU040972	0.944212	0.635164	1.66161	0.382259	0.702269	NA
AU041133	191.386	-0.205251	0.139802	-1.46816	0.142062	0.423707
AV039307	24.7768	0.400525	0.336019	1.19197	0.233273	0.538758
AV051173	13.6159	0.235667	0.396297	0.594672	0.552062	0.79838
AV064505	0.0681962	0.512277	3.79876	0.134854	0.892728	NA
AV320801	370.942	-0.298873	0.41865	-0.713897	0.475291	0.745534
AW011738	16.2047	-0.2565	0.497865	-0.5152	0.606413	0.829647
AW046200	74.1235	0.118376	0.196925	0.601122	0.547758	0.795081
AW112010	0.659697	0.135655	2.26447	0.0599058	0.952231	NA
AW146154	487.443	0.128047	0.112445	1.13875	0.254806	0.560987
AW209491	479.61	-0.169887	0.097626	-1.74018	0.0818278	0.31282
AW495222	1.38127	1.15721	1.37219	0.843333	0.399042	NA
AW549542	122.991	0.163871	0.160816	1.019	0.308204	0.61306
AW549877	3929.7	-0.0133122	0.0893802	-0.14894	0.881601	0.95487
AW551984	1180.06	-0.28938	0.0724151	-3.99613	6.43865e-05	0.00132834
AW554918	705.213	0.200012	0.0948767	2.10812	0.0350204	0.183891
AW822252	17.014	0.207813	0.369015	0.563156	0.573328	0.810417
AY074887	201.582	-0.105583	0.119309	-0.884951	0.376183	0.669983
AY358078	119.192	0.0259516	0.223519	0.116105	0.907569	0.966366
AY512915	0	NA	NA	NA	NA	NA
AY512931	4.7562	-1.32029	0.750091	-1.76018	0.0783776	NA
AY702102	1.56795	0.70986	1.41329	0.502273	0.615475	NA
AY702103	0.0877705	0.512277	3.79876	0.134854	0.892728	NA
AY761184	0	NA	NA	NA	NA	NA
AY761185	0	NA	NA	NA	NA	NA
Aaas	1288.34	0.378411	0.0769938	4.91483	8.88614e-07	3.0934e-05
Aacs	783.242	-0.103619	0.0933979	-1.10944	0.267241	0.573158
Aadac	2.36567	-2.57133	1.69582	-1.51627	0.129451	NA
Aadacl2	0.351194	0.681073	3.22055	0.211477	0.832515	NA
Aadacl3	0.91063	-0.0648033	2.41336	-0.0268519	0.978578	NA
Aadat	1.59566	-1.07155	1.29665	-0.826404	0.408575	NA
Aaed1	254.403	0.22418	0.136864	1.63797	0.101427	0.352896
Aagab	1028.33	-0.0408867	0.0674535	-0.606147	0.544417	0.793295
Aak1	2046.17	0.222614	0.1168	1.90594	0.0566581	0.250456
Aamdc	515.422	0.17298	0.132842	1.30215	0.192866	0.492604
Aamp	3134.03	-0.0200968	0.0734976	-0.273435	0.784519	0.914226
Aanat	4.55053	-0.408462	0.67139	-0.608382	0.542934	NA
Aar2	927.437	0.290236	0.0736779	3.93925	8.17372e-05	0.00162247
Aard	558.909	0.018503	0.129143	0.143275	0.886073	0.956843
Aars	1760.43	0.0358272	0.0650745	0.550557	0.581937	0.81516
Aars2	497.759	-0.106492	0.0973032	-1.09444	0.273762	0.579944
Aarsd1	714.684	0.0255152	0.0864216	0.295241	0.76781	0.908836
Aasdh	530.954	-0.0560618	0.118632	-0.472567	0.636522	0.842811
Aasdhppt	1135.57	0.00410373	0.0796178	0.0515429	0.958893	0.984136
Aass	65.9998	0.0264174	0.240147	0.110005	0.912405	0.968069
Aatf	909.111	-0.0134045	0.075063	-0.178577	0.85827	0.94536
Aatk	57.2001	-0.448855	0.278466	-1.61189	0.106987	0.362049
Abat	2911.73	-0.133354	0.0908587	-1.46771	0.142184	0.423813
Abca1	1283.11	-0.0951341	0.0888801	-1.07036	0.284455	0.58932
Abca12	8.43381	-0.190308	0.542935	-0.350517	0.725951	0.888622
Abca13	31.5318	-0.831269	0.337819	-2.4607	0.0138668	0.0972012
Abca14	0	NA	NA	NA	NA	NA
Abca15	0.354329	1.65217	2.76333	0.597892	0.549912	NA
Abca16	12.8525	1.06116	0.524654	2.02258	0.0431162	0.209674
Abca17	30.2206	0.427999	0.299621	1.42847	0.153158	0.440298
Abca2	854.23	0.164916	0.134708	1.22424	0.22086	0.524745
Abca3	606.159	0.122047	0.0852869	1.43102	0.152424	0.439289
Abca4	239.453	0.000719324	0.128192	0.00561128	0.995523	0.998163
Abca5	425.135	0.191003	0.130309	1.46577	0.14271	0.424709
Abca6	28.1591	-0.367698	0.323044	-1.13823	0.255025	0.561127
Abca7	295.245	-0.299036	0.148071	-2.01954	0.043431	0.210826
Abca8a	8.96956	-0.323778	0.554687	-0.583713	0.559413	0.801479
Abca8b	113.851	-0.166579	0.236551	-0.704198	0.48131	0.749488
Abca9	88.9124	-0.260211	0.185617	-1.40187	0.160954	0.450289
Abcb10	1098.37	-0.361447	0.137683	-2.62522	0.00865937	0.0691431
Abcb11	0.82712	-0.582255	2.03009	-0.286812	0.774256	NA
Abcb1a	78.8419	-0.0195625	0.194882	-0.100381	0.920042	0.970266
Abcb1b	47.4168	-0.192386	0.222705	-0.863862	0.387664	0.678876
Abcb4	89.0996	-0.184147	0.321537	-0.572709	0.566842	0.806013
Abcb5	0.452205	-0.449517	2.62355	-0.171339	0.863957	NA
Abcb6	646.165	0.0137171	0.100816	0.136061	0.891773	0.959214
Abcb7	1133.48	0.174679	0.155042	1.12666	0.259886	0.566958
Abcb8	842.161	-0.0184651	0.0800717	-0.230607	0.81762	0.926951
Abcb9	38.0826	0.393325	0.247409	1.58978	0.111885	0.371292
Abcc1	991.183	-0.137264	0.0644437	-2.12998	0.0331729	0.176817
Abcc10	621.739	0.104803	0.0798922	1.31181	0.189584	0.488834
Abcc12	3.14842	0.226077	0.917756	0.246336	0.805422	NA
Abcc2	131.97	0.0168048	0.197551	0.0850656	0.932209	0.975172
Abcc3	82.9786	-0.104982	0.180707	-0.58095	0.561274	0.802546
Abcc4	327.655	-0.305356	0.181211	-1.68509	0.0919715	0.334929
Abcc5	3054.49	-0.105141	0.0940278	-1.11819	0.263485	0.570444
Abcc6	10.4153	-0.195227	0.457939	-0.426317	0.669877	0.860819
Abcc8	5.21638	0.17235	0.683756	0.252064	0.800992	NA
Abcc9	310.583	-0.0516301	0.120034	-0.430127	0.667103	0.858813
Abcd1	760.683	0.363712	0.142156	2.55854	0.0105113	0.0799261
Abcd2	152.384	-0.0485322	0.126875	-0.382519	0.702076	0.876759
Abcd3	1478.12	-0.0585943	0.0614857	-0.952974	0.340603	0.64107
Abcd4	472.585	-0.0910789	0.0851956	-1.06906	0.285044	0.590074
Abce1	4480.65	0.0162359	0.0777787	0.208744	0.834648	0.93406
Abcf1	1800.32	-0.0542922	0.0677278	-0.801624	0.42277	0.704105
Abcf2	2931.99	0.372379	0.0776456	4.79588	1.61961e-06	5.20357e-05
Abcf3	1362.13	-0.0950867	0.067913	-1.40012	0.161476	0.450939
Abcg1	351.26	-0.251045	0.134107	-1.87197	0.0612101	0.262893
Abcg2	1314.12	-0.00457039	0.0896789	-0.0509639	0.959354	0.984172
Abcg3	10.8963	0.210502	0.483385	0.435475	0.663218	0.85743
Abcg4	163.171	-0.151882	0.204917	-0.741185	0.458581	0.732776
Abcg5	16.8493	-0.212994	0.434147	-0.490603	0.623707	0.836963
Abcg8	4.99543	0.136625	0.714239	0.191287	0.8483	NA
Abhd1	3.48411	-0.198506	0.770042	-0.257786	0.796572	NA
Abhd10	781.876	0.0772917	0.0766997	1.00772	0.31359	0.617869
Abhd11	1052.21	-0.148507	0.0831327	-1.78639	0.0740367	0.295076
Abhd11os	56.7977	-0.153317	0.258072	-0.594086	0.552455	0.798476
Abhd12	1277.37	0.295201	0.0832895	3.54427	0.000393696	0.00589892
Abhd12b	0.385879	1.73064	3.15012	0.54939	0.582738	NA
Abhd13	1036.27	0.099215	0.0881363	1.1257	0.260293	0.567472
Abhd14a	919.692	-0.142787	0.0965142	-1.47944	0.139023	0.419266
Abhd14b	632.857	0.10147	0.0889688	1.14051	0.254074	0.55999
Abhd15	19.7081	-0.107984	0.358436	-0.301265	0.763212	0.907077
Abhd16a	636.5	0.169491	0.0903505	1.87592	0.0606659	0.261742
Abhd16b	8.41891	0.543407	0.545484	0.996192	0.319157	0.622157
Abhd17a	1736.21	-0.0502184	0.10774	-0.466106	0.641139	0.845125
Abhd17b	703.312	-0.0257887	0.0924034	-0.279088	0.780177	0.913063
Abhd17c	1143.02	0.0171699	0.0703173	0.244178	0.807093	0.922556
Abhd2	138.2	-0.607239	0.345024	-1.75999	0.0784092	0.305683
Abhd3	551.826	-0.0502687	0.0987034	-0.50929	0.610549	0.831546
Abhd4	2321.11	-0.0245436	0.0909403	-0.269887	0.787247	0.915324
Abhd5	339.643	-0.114302	0.0911808	-1.25358	0.209995	0.512086
Abhd6	563.321	-0.0124003	0.0888309	-0.139594	0.888981	0.958376
Abhd8	774.803	0.0359572	0.0855286	0.420412	0.674185	0.863181
Abi1	1884.63	0.110653	0.0744061	1.48715	0.136975	0.415996
Abi2	1825.97	0.171508	0.0764606	2.24309	0.0248912	0.146507
Abi3	56.9096	-0.404679	0.228584	-1.77037	0.0766654	0.30076
Abi3bp	198.596	-0.016012	0.156079	-0.102589	0.918289	0.970021
Abl1	3964.06	0.0114659	0.0659817	0.173774	0.862043	0.947408
Abl2	1747.84	-0.187135	0.156222	-1.19787	0.230966	0.535713
Ablim1	1351.35	-0.136172	0.165901	-0.820801	0.41176	0.695406
Ablim2	74.5061	0.048672	0.200695	0.242517	0.808379	0.923208
Ablim3	618.274	-0.123793	0.127879	-0.968049	0.33302	0.634542
Abo	4.52613	0.18412	0.788356	0.233549	0.815335	NA
Abr	1902.73	0.0847792	0.0603417	1.40499	0.160026	0.448695
Abra	1.60541	1.64502	1.86406	0.882492	0.377511	NA
Abracl	702.158	-0.126469	0.133565	-0.946871	0.343705	0.643289
Abt1	704.838	0.0695866	0.0928161	0.749726	0.45342	0.727701
Abtb1	694.846	0.0232193	0.0856678	0.271039	0.786361	0.914833
Abtb2	266.396	0.421983	0.121422	3.47535	0.000510187	0.0072766
Acaa1a	1469.42	-0.0491308	0.0813719	-0.603781	0.545989	0.793931
Acaa1b	803.604	0.0184194	0.103669	0.177676	0.858977	0.945841
Acaa2	5671.16	-0.181573	0.0664708	-2.73163	0.00630226	0.0544399
Acaca	1589.7	0.396408	0.0802493	4.9397	7.82418e-07	2.77724e-05
Acacb	348.305	-0.146807	0.12005	-1.22287	0.221377	0.52516
Acad10	234.561	0.131923	0.100904	1.30741	0.191075	0.490663
Acad11	642.917	-0.0975018	0.0774612	-1.25872	0.208132	0.510194
Acad12	205.375	0.178667	0.109511	1.63149	0.102787	0.355467
Acad8	1084.11	0.0904581	0.0765104	1.1823	0.237088	0.54233
Acad9	1021.99	0.0133416	0.0646454	0.206381	0.836493	0.934566
Acadl	1934.53	-0.0597311	0.0727803	-0.820703	0.411815	0.695428
Acadm	1699.02	-0.228705	0.0612157	-3.73605	0.000186935	0.0032227
Acads	892.876	-0.0926519	0.0960405	-0.964717	0.334686	0.635689
Acadsb	1756.14	-0.060798	0.072146	-0.842708	0.399392	0.686741
Acadvl	1561.34	0.292988	0.0798264	3.67032	0.000242247	0.003978
Acan	115.371	-0.352536	0.198991	-1.77162	0.0764576	0.300193
Acap1	25.2473	0.350924	0.313758	1.11845	0.263373	0.570387
Acap2	1473.77	0.0539865	0.0885224	0.609863	0.541952	0.791883
Acap3	451.259	-0.0160319	0.0878108	-0.182573	0.855133	0.943781
Acat1	2196.88	-0.158916	0.0677814	-2.34454	0.0190507	0.120555
Acat2	2562.64	0.389109	0.0715288	5.43989	5.33137e-08	2.42101e-06
Acat3	464.101	0.441973	0.114841	3.84858	0.000118806	0.00219232
Acbd3	1413.36	0.122883	0.0951062	1.29207	0.196334	0.496934
Acbd4	206.243	-0.0346358	0.117565	-0.294609	0.768293	0.908836
Acbd5	796.265	-0.0607001	0.0903066	-0.672155	0.501485	0.762499
Acbd6	922.817	0.0803771	0.0889287	0.903838	0.366082	0.662189
Acbd7	5.3942	0.544084	0.685845	0.793305	0.4276	NA
Accs	381.105	-0.0539231	0.111277	-0.484585	0.627971	0.838676
Accsl	1.08105	0.63912	1.75055	0.365097	0.715039	NA
Acd	700.145	0.100318	0.118057	0.849737	0.395471	0.683877
Ace	22.8462	-0.396805	0.326548	-1.21515	0.224308	0.528447
Ace2	494.959	-0.17975	0.0872426	-2.06034	0.0393659	0.198308
Ace3	0.185131	-0.449511	3.79876	-0.118331	0.905806	NA
Acer1	23.3475	-0.137711	0.364865	-0.37743	0.705854	0.878642
Acer2	226.45	-0.143637	0.139731	-1.02796	0.30397	0.609777
Acer3	783.473	1.52472	0.169917	8.97334	2.87655e-19	7.79401e-17
Ache	62.3425	-0.826713	0.693155	-1.19268	0.232994	0.538496
Acin1	6358.52	-0.0133695	0.0551289	-0.242513	0.808382	0.923208
Ackr1	61.8783	-0.906925	0.379154	-2.39197	0.0167581	0.110055
Ackr2	14.8153	-0.389349	0.406552	-0.957686	0.338221	0.638799
Ackr3	134.545	-0.0767649	0.171337	-0.448034	0.654129	0.852575
Ackr4	265.472	0.0813711	0.112648	0.722346	0.470082	0.740685
Acly	2689.62	-0.0736202	0.0582784	-1.26325	0.206499	0.508736
Acmsd	11.8265	-0.230439	0.519048	-0.443964	0.657068	0.853982
Acnat1	11.8062	-0.923335	0.457394	-2.01869	0.0435196	0.21098
Acnat2	1.47731	-1.43407	1.53974	-0.93137	0.351662	NA
Aco1	1641.21	-0.140611	0.0796148	-1.76614	0.0773723	0.30271
Aco2	5170.7	0.191065	0.0630536	3.03019	0.00244399	0.026094
Acot1	2308.14	-0.0953871	0.0884809	-1.07805	0.28101	0.58614
Acot10	253.713	-0.366437	0.153062	-2.39404	0.0166641	0.109679
Acot11	151.701	-0.60337	0.135925	-4.43899	9.03816e-06	0.000241667
Acot12	2.26652	0.273879	1.08851	0.251609	0.801343	NA
Acot13	711.05	-0.0357037	0.0971626	-0.367464	0.713273	0.881465
Acot2	1378.58	-0.054181	0.09382	-0.577499	0.563603	0.803554
Acot3	325.591	-0.213143	0.140403	-1.51808	0.128994	0.403281
Acot4	170.725	-0.273702	0.174271	-1.57056	0.116286	0.379686
Acot5	371.718	-0.235977	0.146777	-1.60772	0.107895	0.363837
Acot6	206.662	-0.19966	0.141717	-1.40886	0.158875	0.44709
Acot7	877.509	0.29194	0.10549	2.76746	0.00564943	0.05038
Acot8	278.91	0.0239198	0.118908	0.201163	0.840571	0.936612
Acot9	566.928	-0.248186	0.122115	-2.0324	0.0421127	0.207086
Acox1	1394.91	0.0667421	0.0616887	1.08192	0.279289	0.584351
Acox2	0.676227	-3.80456	3.65105	-1.04204	0.297391	NA
Acox3	375.816	0.168424	0.0975649	1.72627	0.084298	0.317671
Acoxl	10.1216	-0.0259349	0.490262	-0.0529001	0.957812	0.983896
Acp1	2425.17	-0.0855064	0.0994999	-0.859362	0.390141	0.680334
Acp2	1464.43	0.164943	0.0666535	2.47463	0.0133375	0.0944786
Acp5	322.125	-0.453315	0.416712	-1.08784	0.276668	0.58248
Acp6	458.503	0.0213281	0.104631	0.203841	0.838478	0.935582
Acpp	20.0712	-0.128728	0.379008	-0.339643	0.734125	0.892445
Acpt	1.86556	-0.789545	1.12492	-0.70187	0.48276	NA
Acr	24.7096	0.107263	0.356644	0.300758	0.763599	0.907249
Acrbp	328.011	-0.0421505	0.103839	-0.405921	0.684801	0.868187
Acrv1	0.0945505	-1.02659	3.79876	-0.270242	0.786974	NA
Acsbg1	1487.2	-0.00997847	0.0979711	-0.101851	0.918875	0.970136
Acsbg2	6.10089	-2.49747	0.963518	-2.59204	0.009541	NA
Acsf2	1034.39	-0.191722	0.0831765	-2.305	0.0211663	0.13007
Acsf3	326.825	0.328853	0.103245	3.18517	0.00144669	0.0170713
Acsl1	680.026	0.172522	0.0916589	1.88221	0.0598071	0.259691
Acsl3	1741.47	0.00547557	0.101221	0.054095	0.956859	0.98357
Acsl4	473.049	0.0718292	0.0855034	0.840074	0.400867	0.687054
Acsl5	547.402	-0.188729	0.133383	-1.41494	0.157086	0.444801
Acsl6	19.3982	0.403843	0.376356	1.07303	0.283256	0.588259
Acsm1	0	NA	NA	NA	NA	NA
Acsm2	0.19649	-1.02659	3.79876	-0.270243	0.786973	NA
[truncated: 22,422 more rows]
