# Supplementary material for: Dynamic and regulated TAF gene expression during mouse embryonic germ cell development
Source: PLoS Genet. 2020 Jan 8;16(1):e1008515. doi: 10.1371/journal.pgen.1008515 (PMC7010400; doi:10.1371/journal.pgen.1008515)
Supplement: S10 Table — Sheet 2 (“All_TPMs”) contains a TPM values table for all samples and genes. Sheet 3 (“Quick_Calc”) contains search and plotting tools to quickly evaluate the data. Sheet 4 (‘DESeq_WT_Stra8KO’) contains DESeq2 results for WT versus KO gene expression. S10 Table is associated with Fig 7 and Fig 8. (XLSX) [file pgen.1008515.s016.xlsx]

## Sheet: Description
Table S10 Description
Transcripts per million (TPM) of all re-processed RNA-seq data from Kojima et al with quick and easy tabs for asking specific questions about the data
In the colored tab, simply enter gene names into the yellow highlighted boxes
DESeq2 output for comparisons between WT(Stra8-high in Kojima et al) and Stra8-KO preleptotene germ cells
Tab Name	Description
All_TPMs	Full Table of all TPMs for all samples
Quick_Calc	Tab for comparing the expression of a gene between the WT and Stra8-KO samples
DESeq_WT_Stra8KO	DESeq2 results for WT vs Stra8-KO gene expression
Note: Taf7l2 is labeled "4933416C03Rik" in this file

## Sheet: All_TPMs
dataMerge[, 1]	TPM_Stra8_WT_1	TPM_Stra8_WT_2	TPM_Stra8_KO_1	TPM_Stra8_KO_2	TPM_Stra8_KO_3
0610005C13Rik	0	0	0	0	0
0610007P14Rik	32.7678	28.6025	29.8482	24.4602	35.8129
0610009B22Rik	17.2527	16.4125	20.8011	16.2661	21.175
0610009L18Rik	0.131723	0.33969	0.12875	0.554223	1.21313
0610009O20Rik	21.1097	22.7558	20.6834	22.8098	23.6455
0610010B08Rik	0	0	0	0	0
0610010F05Rik	9.71306	11	7.03239	4.14323	5.03265
0610010K14Rik	62.6916	57.2672	67.5394	73.466	102.696
0610011F06Rik	20.4503	20.9403	16.1869	15.84	18.7547
0610012G03Rik	5.10849	4.26861	6.80044	6.75261	9.17074
0610030E20Rik	4.04252	4.12572	5.3106	4.80478	4.60764
0610031O16Rik	0	0	0	0	0
0610037L13Rik	18.1608	18.8132	9.50605	9.14788	5.71314
0610038B21Rik	0.477145	0.463197	0	0	0.058092
0610039H22Rik	0	0	0	0	0
0610039K10Rik	0.228395	0.179404	0	0.093727	0
0610040B10Rik	2.12547	1.6248	2.36521	2.90609	2.40037
0610040F04Rik	0	0	0	0	0.076403
0610040J01Rik	0.043603	0	0	0	0.047313
0610043K17Rik	0	0.132856	0	0	0
1010001N08Rik	0	0	0	0	0
1110001J03Rik	20.9519	21.978	28.86	23.1995	44.3752
1110002L01Rik	0.276074	0.592412	1.37918	0.828025	0.093669
1110004E09Rik	44.4637	42.6996	45.4359	47.9655	56.3359
1110004F10Rik	50.7772	54.6195	38.1871	36.8999	43.1819
1110006O24Rik	0.792272	1.0267	0.513604	0.80464	1.08433
1110007C09Rik	47.6769	46.0183	55.48	62.5927	81.3396
1110008F13Rik	37.8486	38.9406	41.8845	42.0801	56.0703
1110008L16Rik	3.82044	2.74692	5.05804	5.01168	6.60866
1110008P14Rik	20.2367	13.3603	37.5105	38.7562	60.2169
1110012L19Rik	4.9489	4.21978	10.1761	8.20008	17.0147
1110015O18Rik	0	0	0	0	0
1110017D15Rik	0	0	0	0	0
1110019D14Rik	1.27775	1.70626	1.12869	0.85023	0.560349
1110020A21Rik	0	0	0.261893	0	0.071308
1110025L11Rik	0	0	0	0	0
1110028F11Rik	0	0	0	0	0
1110028F18Rik	0	0	0	0	0
1110032A03Rik	25.1208	22.7742	25.0885	31.4433	29.6242
1110032F04Rik	0.142325	0.146812	0.13931	0.180534	0.051479
1110034G24Rik	1.93418	1.39212	2.04576	1.97388	2.57864
1110036E04Rik	0	0	0	0	0
1110037F02Rik	19.9473	20.7489	20.0615	22.3575	19.0829
1110038B12Rik	9.62168	11.6457	21.3238	20.187	19.2336
1110038F14Rik	22.7129	23.6474	24.9175	25.2566	29.8932
1110046J04Rik	0.314812	0	0	0.20008	0
1110051M20Rik	10.3681	10.8157	12.3414	11.7595	17.1207
1110058D11Rik	0	0	0	0	0
1110059E24Rik	17.9813	15.8038	19.8502	16.1617	20.5539
1110059G10Rik	8.17576	8.00688	6.7823	5.55261	5.45003
1110065P20Rik	29.7896	22.4167	39.8593	38.1897	49.5252
1190002F15Rik	0	0	0	0	0
1190002N15Rik	9.71816	9.36091	9.71267	6.02514	5.52218
1190003K10Rik	0	0	0	0	0
1190005I06Rik	0	0	0	0	0
1190007I07Rik	5.01585	4.90414	5.62589	4.70233	5.99416
1200014J11Rik	27.322	24.9861	24.7936	22.0213	24.5024
1300002E11Rik	4.49352	5.10382	4.74416	4.17854	5.54776
1300017J02Rik	0	0.206188	0.436785	0.575017	0.380635
1500004A13Rik	7.66722	9.2541	4.39227	6.20651	4.99399
1500009C09Rik	0	0	0	0	0
1500009L16Rik	2.95262	3.39985	1.69575	3.40028	2.78752
1500011B03Rik	23.5687	22.2482	48.3547	52.4606	59.0663
1500011K16Rik	6.68759	6.9516	7.21955	6.28376	10.0131
1500012F01Rik	2.10101	4.11306	4.60595	10.0048	6.9728
1500012K07Rik	0	0	0	0	0
1500015A07Rik	1.1734	1.04739	1.40065	0.889803	1.74433
1500015L24Rik	0	0	0	0	0
1500015O10Rik	0	0	0	0.130209	0
1500017E21Rik	0	0	0	0	0
1500026H17Rik	0	0	0.026591	0	0
1600002D24Rik	0	0	0	0	0
1600002H07Rik	6.6147	7.70936	17.509	19.1456	19.8728
1600002K03Rik	3.87172	4.11492	3.42016	3.32537	4.35345
1600010M07Rik	0	0	0	0	0
1600012H06Rik	11.9276	11.2707	20.8633	15.4432	14.5146
1600014C10Rik	2.70373	2.08882	1.38458	1.3777	1.98023
1600014C23Rik	0	0	0	0	0.50813
1600014K23Rik	0	0	0	0	0
1600015I10Rik	0	0	0	0	0
1600019K03Rik	0	0	0	0	0
1600020E01Rik	4.31142	1.37193	1.10177	3.1017	1.79306
1600023N17Rik	0.682502	0.913664	0.079064	0.573538	0.438861
1600025M17Rik	0	0	0	0	0
1600027J07Rik	0	0	0	0	0
1600029I14Rik	0	0	0	0	0
1600029O15Rik	0.182543	0.191409	0.150012	0	0
1700001C02Rik	0	0	0	0	0
1700001C19Rik	0.050269	0.077781	0.273662	0.143769	0.430069
1700001D01Rik	0	0	0	0	0
1700001F09Rik	0	0	0	0	0
1700001G01Rik	0	0	0	0	0
1700001G11Rik	0.371101	0.54686	0.519496	0.657027	0.632783
1700001G17Rik	0.549155	0.888139	0.090783	0.087437	0.39311
1700001J03Rik	0	0	0	0	0
1700001J11Rik	0.692855	0.586373	0.525358	0.534147	0.57145
1700001K19Rik	0	0	0	0.076919	0
1700001K23Rik	0	0	0	0	0
1700001L05Rik	58.9611	59.9875	21.5277	23.9008	13.3576
1700001L19Rik	0	0	0	0	0.122337
1700001O22Rik	0	0.116815	0.165521	0.229347	0
1700001P01Rik	0	0	0	0	0
1700003C15Rik	0	0	0	0	0
1700003D09Rik	0.313845	0.206687	0.321234	0.326349	0.147195
1700003E16Rik	1.58994	1.65395	0.790292	0.987579	0.664099
1700003E24Rik	0	0	0	0	0
1700003F12Rik	1.66437	2.43148	0.812009	1.52968	0.479791
1700003G13Rik	0	0	0	0	0
1700003G18Rik	0	0	0	0	0
1700003H04Rik	0	0	0	0	0
1700003I22Rik	0	0	0	0	0
1700003L19Rik	0	0	0	0	0
1700003M02Rik	0	0	0	0	0
1700003M07Rik	0.109142	0.384013	1.71434	1.63692	2.06386
1700003P14Rik	0	0	0	0	0
1700006A11Rik	0	0	0	0	0
1700006E09Rik	0	0	0	0	0
1700006F04Rik	0	0	0	0	0
1700006H21Rik	0	0	0	0	0
1700007B14Rik	0	0	0	0	0
1700007F19Rik	0	0	0	0	0
1700007G11Rik	0.519663	1.75602	1.13834	1.84622	1.51981
1700007J10Rik	0	0	0	0	0
1700007K09Rik	0	0	0.119387	0	0
1700007K13Rik	0.19522	0	0	0.241702	0
1700007L15Rik	4.92819	4.49528	2.62899	3.11393	4.84641
1700007P06Rik	0	0	0	0	0
1700008C04Rik	0	0	0	0	0
1700008J07Rik	2.14244	2.04362	1.10879	1.10988	1.02908
1700008K24Rik	0	0	0	0	0
1700008O03Rik	0.284006	0	0.17718	0	0.242795
1700008P02Rik	0	0	0	0	0
1700009C05Rik	0	0	0	0	0
1700009J07Rik	0	0	0	0	0
1700009N14Rik	0	0	0	0	0
1700010B08Rik	0	0	0.180146	0	0
1700010D01Rik	0	0	0	0	0
1700010I02Rik	0	0	0	0	0
1700010I14Rik	0.28058	0.44625	0.664266	0.763654	0.796765
1700010J16Rik	0	0	0	0	0
1700010K23Rik	0	0	0	0	0
1700011A15Rik	0	0	0	0	0
1700011B04Rik	0	0	0	0	0
1700011C11Rik	0	0	0	0	0
1700011E24Rik	0	0	0	0	0
1700011H14Rik	0	0	0	0	0
1700011I03Rik	0	0	0	0	0
1700011L22Rik	0	0	0	0	0
1700011M02Rik	26.567	30.45	12.9889	24.6797	16.8191
1700012A03Rik	0	0	0	0	0
1700012B07Rik	0.13025	0	0.257845	0.361492	0
1700012B09Rik	0	0	0	0	0
1700012C14Rik	0.491183	0.584781	0.563156	1.32674	2.13192
1700012D01Rik	0	0	0	0	0
1700012D14Rik	0	0.654711	0	0	0.610617
1700012D16Rik	0	0	0	0	0
1700012H19Rik	0	0	0	0	0
1700012I11Rik	0	0	0	0	0
1700012L04Rik	0.038827	0.096123	0.015372	0	0.033704
1700012P22Rik	0	0	0	0	0
1700013D24Rik	0	0	0	0	0
1700013F07Rik	0	0	0	0.320616	0
1700013G24Rik	0	0	0	0	0
1700013H16Rik	346.34	355.612	299.514	276.876	265.606
1700015E13Rik	0	0	0	0	0
1700015F17Rik	0	0	0	0	0
1700015G11Rik	0	0	0	0	0
1700016C15Rik	0	0	0	0	0
1700016D06Rik	0	0	0	0	0
1700016G22Rik	0	0	0	0	0
1700016H13Rik	0	0	0	0	0
1700016K19Rik	0.841036	1.4543	0.522482	1.13411	0.960635
1700016L04Rik	0.29048	0.092425	0.120361	0	0
1700016L21Rik	0	0	0	0	0
1700016P04Rik	0	0	0	0	0
1700017B05Rik	9.43978	7.9449	6.32484	8.74182	6.75132
1700017D01Rik	0	0	0	0	0
1700017G19Rik	0	0	0	0	0
1700017J07Rik	0	0	0	0	0
1700017L05Rik	0	0	0	0	0
1700017N19Rik	0	0	0	0	0
1700018A04Rik	0	0	0	0	0
1700018B08Rik	0	0	0	0.430012	0.327683
1700018B24Rik	9.05862	8.64033	10.8314	12.3297	14.9488
1700018C11Rik	0	0	0	0	0
1700018F24Rik	0	0	0	0	0
1700018G05Rik	27.3318	28.1872	9.46368	17.3605	6.84424
1700018L02Rik	0.326112	0.367589	0.09708	0.464393	0.245664
1700019A02Rik	0	0	0	0	0
1700019B03Rik	0.075825	0	0	0	0
1700019B21Rik	98.8206	102.767	57.3612	63.7017	52.154
1700019C18Rik	0	0	0	0	0
1700019D03Rik	0	0	0	0	0
1700019E08Rik	0	0	0	0	0.13933
1700019G17Rik	6.76895	6.50671	2.33629	2.58051	2.09963
1700019G24Rik	0	0	0	0	0
1700019L03Rik	0.127868	0	0.493566	0	0.121191
1700019M22Rik	0	0	0	0	0
1700019N19Rik	0	0	0	0	0
1700019O17Rik	0	0.024435	0	0	0
1700020A23Rik	0	0	0	0	0
1700020D05Rik	0.758152	0.206347	1.15534	0.804775	1.12764
1700020D14Rik	0	0	0	0	0
1700020G17Rik	0	0	0	0	0
1700020I14Rik	43.2525	43.7824	44.6538	30.883	25.8059
1700020L24Rik	0.394107	0.797332	0.17229	0.207687	0.599319
1700020M21Rik	0	0	0	0	0
1700020N01Rik	4.6629	3.88318	3.94019	3.16079	5.57158
1700020N15Rik	0	0	0	0	0
1700020N18Rik	0	0	0	0	0
1700021F05Rik	7.72872	10.29	8.06253	7.82972	10.7598
1700021F07Rik	0	0	0	0	0
1700021K19Rik	16.83	17.3951	12.6515	11.8645	13.438
1700021N21Rik	0	0.185873	0	0	0
1700022A21Rik	0	0	0	0	0
1700022A22Rik	0	0	0	0	0
1700022E09Rik	0	0	0	0	0
1700022H01Rik	0	0	0.176986	0	0
1700022H16Rik	0	0	0	0	0
1700022I11Rik	0	0.044017	0	0	0
1700023C21Rik	0	0	0	0	0
1700023F02Rik	0	0	0	0	0
1700023F06Rik	0	0	0	0	0.423615
1700024B18Rik	0	0	0	0	0
1700024F13Rik	0.288723	0.501311	0.481789	0.803635	0.429809
1700024G13Rik	0	0	0	0	0
1700024I08Rik	0	0	0	0	0
1700024N05Rik	0	0	0	0	0
1700024P04Rik	0	0	0	0.081651	0
1700024P16Rik	0.498681	0.788307	0.500015	0.995638	0.581751
1700025B11Rik	0	0	0	0	0
1700025C18Rik	0	0	0	0	0
1700025F22Rik	0	0	0	0	0
1700025F24Rik	0	0	0	0	0
1700025G04Rik	0.579402	0.686714	0.523445	0.749956	0.70305
1700025J12Rik	0	0	0	0	0
1700025K24Rik	0	0	0	0	0
1700025M24Rik	0	0	0	0	0
1700025N23Rik	0.090395	0	0	0.10054	0.124244
1700026D08Rik	0.189033	0.259991	0.155922	0.060071	0
1700026D11Rik	0	0	0	0	0
1700026F02Rik	0	0	0	0	0
1700026J14Rik	0	0	0	0	0
1700026L06Rik	0	0	0	0	0
1700027A15Rik	0	0	0	0	0
1700027F06Rik	0	0	0	0	0
1700027F09Rik	0	0	0	0	0
1700027H10Rik	0	0	0	0	0
1700027I24Rik	0	0	0	0	0
1700027J07Rik	0	0	0	0	0
1700028B04Rik	0.2428	0.431392	0.399323	0.64072	0.775354
1700028D13Rik	0	0	0	0	0
1700028E10Rik	0.371999	0.384091	0.417298	0.519181	0.427185
1700028I16Rik	1.1325	0.993595	1.47214	1.21271	1.23748
1700028J19Rik	0.665176	1.00405	0.48472	0.675729	0.372216
1700028K03Rik	1.40033	1.14757	0.528523	0.524514	1.23756
1700028M03Rik	0	0	0	0	0
1700028P14Rik	0	0	0	0	0
1700028P15Rik	0	0	0	0	0
1700029B22Rik	0	0	0	0	0
1700029F12Rik	0	0	0	0	0
1700029H14Rik	0	0	0	0	0
1700029I15Rik	0	0	0	0	0
1700029J03Rik	0	0	0	0	0
1700029J07Rik	0.141993	0.092088	0.311113	0.056383	0.357208
1700029M20Rik	0	0	0	0.026234	0.029486
1700029N11Rik	0	0	0	0	0
1700029P11Rik	4.03601	3.32599	5.42486	4.8397	6.08424
1700030A11Rik	0	0	0	0	0
1700030C10Rik	3.60548	3.64382	1.72585	2.10936	1.97153
1700030F04Rik	0	0	0	0	0
1700030F18Rik	0	0	0	0	0
1700030J22Rik	3.54021	3.63849	3.18682	2.85933	3.12733
1700030K09Rik	4.22864	5.50927	1.42555	1.41108	1.48259
1700030L20Rik	0	0	0	0	0
1700030M09Rik	0	0	0	0	0
1700030N03Rik	0	0	0	0	0
1700030O20Rik	0	0	0	0	0
1700031A10Rik	0	0	0	0	0
1700031F05Rik	3.05611	5.45698	0.146872	0.109548	0
1700031M16Rik	0	0	0	0	0
1700031P21Rik	0	0	0	0	0
1700034E13Rik	0	0	0	0	0
1700034G24Rik	0	0	0	0	0
1700034H15Rik	0.398657	0.338878	0.136606	0.221993	0.13364
1700034I23Rik	0.155814	0.105807	0.04302	0.02486	0.037729
1700034J05Rik	0	0	0	0	0
1700034K08Rik	0	0	0	0	0
1700034O15Rik	0	0	0	0	0.119399
1700034P13Rik	0	0.297049	0	0	0
1700036G14Rik	0	0	0	0	0
1700037C18Rik	3.36056	2.74175	1.42732	1.48042	2.00116
1700037H04Rik	37.4818	35.7286	29.737	34.9648	41.3374
1700039E15Rik	0	0	0	0	0
1700039E22Rik	0	0	0	0	0
1700040L02Rik	0.513183	1.10684	0.545153	0.313939	0.666629
1700041A01Rik	0	0	0	0	0
1700041C23Rik	0	0	0	0	0
1700041M19Rik	0	0	0	0	0
1700042G07Rik	0	0	0	0	0
1700042G15Rik	0	0	0	0	0
1700042O10Rik	0	0	0	0	0
1700044C05Rik	0	0	0	0	0
1700044K03Rik	0	0	0	0	0
1700045H11Rik	0	0	0	0	0
1700046C09Rik	0	0	0	0	0
1700047A11Rik	0	0	0	0	0
1700047E10Rik	0	0	0	0	0
1700047G03Rik	0	0	0	0	0
1700047I17Rik2	0	0	0	0	0
1700047L14Rik	0	0	0	0	0
1700047M11Rik	0	0	0	0	0
1700048M11Rik	0	0	0	0	0
1700048O20Rik	13.9902	15.2257	7.58771	9.10047	6.9268
1700049E15Rik	0	0	0	0	0
1700049E22Rik	0	0	0	0	0
1700049G17Rik	0.785298	0.647082	1.28072	0.968941	0.906501
1700049L16Rik	0.025291	0.104352	0	0	0
1700051A21Rik	0	0	0	0	0
1700052I22Rik	0	0	0	0	0
1700052K11Rik	3.88068	3.60096	2.03979	1.5845	1.32868
1700054A03Rik	0	0	0	0	0
1700054K19Rik	0	0	0	0	0
1700054M17Rik	0	0	0	0	0
1700055C04Rik	0	0	0	0	0
1700056E22Rik	0.042159	0.086977	0	0	0.042316
1700057G04Rik	0	0	0	0	0
1700057H15Rik	0	0	0	0	0
1700057H21Rik	0	0	0	0	0
1700060C16Rik	0	0	0	0	0
1700060C20Rik	0	0	0	0	0
1700061F12Rik	0	0	0	0	0
1700061G19Rik	0.102987	0.075827	0	0	0
1700061I17Rik	0	0	0	0	0
1700061J23Rik	0	0	0	0	0
1700063A18Rik	0	0	0	0	0
1700063D05Rik	0	0	0	0	0
1700063O14Rik	0	0	0	0	0
1700064J06Rik	0	0	0	0	0
1700064M15Rik	0	0	0	0	0
1700065D16Rik	0	0.0845	0	0.443032	0
1700065I16Rik	0	0	0	0	0
1700065J11Rik	0	0	0	0	0
1700065J18Rik	0	0	0	0	0
1700065L07Rik	0	0	0	0	0
1700065O20Rik	0	0	0	0	0
1700066B17Rik	0	0	0	0	0
1700066B19Rik	0.048843	0	0.047943	0	0.035333
1700066J03Rik	0	0	0	0	0
1700066M21Rik	6.91592	7.41499	12.3779	8.17898	9.0615
1700066N21Rik	0	0	0	0	0
1700066O22Rik	0	0	0	0	0
1700067G17Rik	0	0	0	0	0
1700067K01Rik	8.9484	8.4841	4.33576	11.7448	6.09689
1700067P10Rik	0	0	0	0	0
1700069L16Rik	0	0	0	0	0
1700069P05Rik	0	0	0	0	0
1700071K01Rik	0.131246	0.233968	0.237383	0.298138	0.345471
1700071M16Rik	0	0	0	0	0
1700072B07Rik	0	0	0	0	0
1700072I22Rik	0	0	0	0	0
1700072O05Rik	0	0	0	0	0
1700073E17Rik	0.017286	0.009145	0.00351	0.016479	0.009378
1700074H08Rik	0	0	0	0	0
1700074P13Rik	0	0	0	0	0
1700080E11Rik	0	0	0	0	0
1700080N15Rik	0	0	0	0	0
1700080O16Rik	7.75835	6.54086	8.77397	9.61168	12.0261
1700081H04Rik	0	0	0	0	0
1700084C01Rik	0	0	0	0	0
1700084D21Rik	0	0	0	0	0
1700084E18Rik	0.967539	1.54067	1.09715	0.678358	0.509647
1700084F23Rik	0	0	0	0	0
1700084J12Rik	2.65955	2.41285	3.62793	3.961	5.05183
1700084M14Rik	0	0	0	0	0
1700085C21Rik	0	0	0	0	0
1700086L19Rik	0	0	0	0	0
1700086O06Rik	0.464637	0.268212	0.248295	0.248501	0.52206
1700088E04Rik	0.035027	0	0.097107	0	0
1700091H14Rik	0	0	0	0	0
1700092C02Rik	0	0	0	0	0
1700092C10Rik	0	0	0	0	0
1700092E19Rik	0	0	0	0	0
1700092K14Rik	0	0	0	0	0
1700092M07Rik	1.06553	0.743705	0.591056	0.458692	0
1700093K21Rik	0.153653	0.062959	0.181893	0	0.099702
1700094D03Rik	0.446416	0.60867	0.586808	0.767085	0.974073
1700094J05Rik	0	0.019918	0	0	0
1700094M24Rik	0	0	0	0	0
1700095A21Rik	0	0	0	0	0
1700095B10Rik	0	0	0	0	0
1700095J12Rik	0	0	0	0	0
1700096J18Rik	0	0	0	0.225692	0
1700096K18Rik	0.445945	0.244514	0.089812	0.241401	0.126698
1700096P03Rik	0	0	0	0	0
1700097N02Rik	0	0	0	0	0
1700099I09Rik	0	0	0	0	0
1700100I10Rik	0	0	0	0	0
1700100L14Rik	0	0	0	0	0
1700101E01Rik	0	0.361362	0	0.469384	0
1700101I11Rik	0	0.299045	0.100131	0.190471	0.439079
1700101O22Rik	0	0	0	0	0
1700102H20Rik	0	0	0.130806	0	0
1700102P08Rik	0	0.152243	0.257258	0.27291	0.497418
1700104L18Rik	0	0	0	0	0
1700105P06Rik	0	0.075772	0	0.070028	0.079707
1700106J16Rik	0	0.034499	0	0.031883	0
1700108F19Rik	0	0	0	0	0
1700108J01Rik	0	0	0	0	0
1700109G14Rik	0	0	0	0	0
1700109G15Rik	0	0	0	0	0
1700109H08Rik	0	0	0	0	0
1700109I08Rik	0	0	0	0	0
1700109K24Rik	0	0	0	0.068736	0
1700110C19Rik	0	0	0	0	0
1700110I01Rik	0	0	0	0	0
1700110I07Rik	0	0	0.384212	0.319865	0
1700110K17Rik	0	0	0	0	0
1700111N16Rik	0	0	0	0	0
1700112E06Rik	0	0	0	0	0
1700112H15Rik	0.20863	0.703412	0.416317	0.241453	0
1700112J05Rik	0	0	0	0	0
1700112J16Rik	0.081904	0.104422	0.114152	0.314257	0
1700113A16Rik	20.7838	16.976	26.3367	30.6923	21.1274
1700113B09Rik	0	0	0	0	0
1700113H08Rik	0	0	0	0	0
1700116B05Rik	0	0	0	0	0
1700119H24Rik	0	0	0	0	0
1700120C14Rik	0	0	0	0	0.484139
1700120E14Rik	0	0	0	0	0
1700120G07Rik	0	0	0	0	0
1700120K04Rik	0.574358	0.567297	0.910351	0.858909	1.45625
1700121L16Rik	0	0	0	0	0
1700121N20Rik	0	0	0	0	0
1700122C19Rik	0	0	0	0	0
1700122O11Rik	0	0	0	0	0
1700123I01Rik	39.728	39.0793	0.636687	1.11681	1.42338
1700123J17Rik	0	0	0	0	0
1700123K08Rik	0	0	0	0	0
1700123L14Rik	0	0	0.023695	0	0
1700123M08Rik	0.771675	0.981939	0.774122	0.6283	1.09165
1700123O12Rik	0	0	0	0	0
1700123O20Rik	13.6344	12.5204	15.1076	13.6407	16.9707
1700123O21Rik	0	0	0	0	0
1700124L16Rik	0.235654	0	0	0.421415	0
1700125G02Rik	0	0	0	0	0
1700125G22Rik	0	0	0	0	0
1700125H03Rik	0	0	0	0	0
1700125H20Rik	0.209067	0.675532	0.620812	0.632652	1.12295
1700126H18Rik	0	0	0	0	0
1700128A07Rik	0	0	0	0	0
1700128F08Rik	0	0	0	0	0
1700129C05Rik	0	0	0	0	0
1810006J02Rik	0	0	0	0	0
1810007C17Rik	0	0	0	0	0
1810007D17Rik	0	0	0	0	0
1810008I18Rik	0	0	0	0	0
1810009A15Rik	33.1046	37.0733	46.1794	49.783	41.636
1810009J06Rik	0	0	0	0	0
1810010D01Rik	0	0	0	0	0
1810010H24Rik	0.333861	0.223753	1.32184	0.526048	0.92379
1810011H11Rik	0	0	0	0	0
1810011O10Rik	0	0	0.060635	0.05402	0.065641
1810012K16Rik	0	0	0	0	0
1810013A23Rik	0	0	0	0	0
1810013L24Rik	39.9411	38.1692	49.1161	42.6318	41.5007
1810014B01Rik	1.90154	2.1882	2.8929	2.34401	2.16044
1810018F18Rik	0	0	0	0	0
1810019D21Rik	0.049536	0	0.096836	0.141673	0
1810020O05Rik	0	0	0	0	0
1810021B22Rik	0.685623	0.577532	0.841956	0	0
1810022K09Rik	41.136	42.6501	45.5974	33.272	43.9311
1810024B03Rik	0	0	0	0	0
1810026B05Rik	0.263967	0.420458	0.07524	0.478661	0
1810026J23Rik	57.0944	51.1389	34.3318	36.6969	32.8949
1810030O07Rik	8.86094	6.76311	13.7915	10.2256	11.1997
1810032O08Rik	1.28614	1.79148	1.67703	1.86916	1.38735
1810034E14Rik	0.47001	0.347584	0.310147	0.107841	0.073647
1810037I17Rik	20.4032	20.304	16.8727	17.3017	24.0079
1810041H14Rik	0.791437	0.238941	0	0	1.1282
1810041L15Rik	0	0	0.040919	0.039411	0.014952
1810043G02Rik	17.1661	15.2586	14.1049	15.6883	15.4832
1810043H04Rik	33.1797	35.0964	47.053	44.8155	58.3748
1810044D09Rik	4.09149	3.17781	2.8002	5.71556	4.71728
1810046K07Rik	0	0	0	0	0
1810053B23Rik	0	0	0	0	0
1810055G02Rik	20.5533	21.101	21.7453	23.9523	20.1529
1810058I24Rik	28.7439	31.4434	26.2627	39.1269	38.8637
1810062G17Rik	0.134253	0	0	0	0.097118
1810062O18Rik	3.24223	2.52066	1.62421	2.3683	1.7736
1810063I02Rik	0	0	0	0	0
1810064F22Rik	0.088549	0.051608	0.017529	0.025325	0.003843
1810065E05Rik	0	0	0	0	0
2010001A14Rik	0.366991	0.931868	0.583636	0.610455	0.681798
2010001E11Rik	0.10534	0	0	0.118497	0
2010003K11Rik	0	0	0.069156	0.099912	0.113721
2010005H15Rik	0	0	0	0	0
2010009K17Rik	0	0	0	0	0
2010010A06Rik	0.565698	1.04074	0.303427	0	0.514387
2010012O05Rik	2.01062	2.33979	2.1527	1.44496	2.15748
2010016I18Rik	0	0	0	0	0
2010106C02Rik	0	0	0	0	0
2010106E10Rik	0	0	0	0	0
2010107E04Rik	254.221	259.303	272.278	261.068	377.479
2010107G12Rik	0.245118	0.288412	0.074797	0.12607	0.102496
2010107G23Rik	2.24307	2.27865	10.266	7.61383	10.5594
2010109A12Rik	0	0	0	0	0
2010109I03Rik	0.025925	0	0	0	0
2010111I01Rik	0.901178	0.643091	0.498901	0.579258	0.583
2010204K13Rik	1.3721	1.77811	1.41308	2.08988	2.39727
2010300C02Rik	0.298212	0.278686	0.415695	0.30212	1.00145
2010308F09Rik	0	0	0	0	0
2010310C07Rik	0	0	0	0	0
2010315B03Rik	0.323982	0.319899	0.30958	0.15287	0.242025
2010320M18Rik	6.47912	5.78166	8.21408	12.1188	12.9594
2200002D01Rik	2.29798	1.95884	1.91519	0.958503	3.69315
2200002J24Rik	0	0.919402	0.132304	0	0
2210010C04Rik	0	0	0	0	0.041304
2210011C24Rik	12.0504	15.0449	12.0435	13.4901	10.1104
2210013O21Rik	12.7796	11.9416	17.3968	22.9777	24.7038
2210015D19Rik	3.42047	3.01778	3.68314	3.30453	3.43134
2210016F16Rik	27.3892	26.0713	37.3554	35.6913	45.1711
2210016L21Rik	9.14673	7.82581	16.8487	16.6352	22.5717
2210018M11Rik	40.4213	40.4747	16.2611	16.2039	14.7002
2210019I11Rik	0	0	0	0	0
2210039B01Rik	0	0	0.174772	0.093517	0
2210404E10Rik	0	0	0	0	0
2210404O09Rik	0.983944	0.760655	0.954978	0.64499	0.434201
2210406O10Rik	1.48833	1.81034	1.98857	1.5818	1.69043
2210407C18Rik	0	0	0	0	0
2210408F21Rik	0	0	1.43752	0	1.30662
2210408I21Rik	0.898348	3.41349	1.35227	0.344428	0.348585
2210409D07Rik	0	0	0	0	0
2210409E12Rik	0.144185	0	0	0	0
2210414B05Rik	0	0	0	0	0
2210416O15Rik	0	0	0.078479	0	0.058826
2210417A02Rik	0	0	0.220106	0	0
2210420H20Rik	0	0	0	0	0
2300002M23Rik	0	0	0	0	0
2300003K06Rik	0	0	0	0	0
2300005B03Rik	0	0	0	0	0
2300009A05Rik	3.46495	3.8555	1.26993	1.84305	3.08292
2310001H17Rik	0	0	0	0	0
2310001K24Rik	0	0	0.087914	0	0.096378
2310002D06Rik	0	0	0	0	0
2310002F09Rik	0	0	0	0	0
2310002L09Rik	0	0	0	0	0
2310003N18Rik	0	0	0	0	0
2310005A03Rik	0	0	0	0	0
2310005E17Rik	0	0	0	0	0
2310007B03Rik	0	0	0	0	0
2310008N11Rik	0	0	0	0	0
2310009A05Rik	3.88002	4.47825	5.97909	5.22059	4.94759
2310009B15Rik	1.40029	0	1.01588	0	0
2310010G23Rik	2.11401	2.53131	2.60271	2.08931	3.61505
2310010J17Rik	0	6.17826	6.53566	4.80773	10.9476
2310011J03Rik	9.62499	8.39487	16.1107	16.3861	19.6215
2310015A10Rik	1.34234	1.30374	2.21139	1.86888	2.16256
2310015D24Rik	0	0	0	0	0
2310016D03Rik	0	0	0	0	0
2310020H05Rik	0	0	0	0	0
2310022A10Rik	5.30968	5.19335	6.22363	6.33717	8.49594
2310022B05Rik	5.92171	5.29748	6.21672	7.46266	6.90114
2310030A07Rik	0	0	0	0	0
2310030G06Rik	0.164123	0.266005	0.644116	0.405241	0.816537
2310033P09Rik	19.8416	18.4297	11.1373	14.3083	16.4827
2310034C09Rik	0	0	0	0	0
2310034G01Rik	0.051736	0.053367	0	0.194822	0
2310034O05Rik	0	0	0	0	0
2310035C23Rik	32.2208	42.4446	37.6889	34.3887	35.4647
2310036O22Rik	92.1865	84.5032	121.449	133.115	145.227
2310039H08Rik	5.47311	5.20365	6.48097	7.87997	9.91333
2310039L15Rik	0.565166	0.522395	0.502837	0.544846	0
2310040G24Rik	0.189178	0	0	0	0
2310043L19Rik	0	0	0	0	0
2310043O21Rik	0	0	0	0	0
2310045N01Rik	7.72389	7.93408	7.97692	16.6849	13.4835
2310045n01rik-mef2b	9.19225	10.4584	9.66589	16.3731	8.51922
2310047M10Rik	8.09141	7.22694	13.474	14.1433	14.7085
2310050C09Rik	0	0	0	0	0
2310057J18Rik	0	0	0	0	0
2310057M21Rik	16.1615	14.9951	16.7061	16.2355	14.5361
2310057N15Rik	0	0	0	0	0
2310061I04Rik	56.2937	68.6862	42.1218	54.7123	49.3658
2310061N02Rik	0	0	0	0	0
2310065F04Rik	0	0	0	0	0
2310067B10Rik	14.9602	21.0556	12.9459	14.8714	10.6756
2310068J16Rik	0.698228	1.30175	0.407595	0.965574	0.458372
2310069B03Rik	0	0	0	0	0
2310069G16Rik	0	0	0	0	0
2310075C17Rik	0	0	0	0	0
2310079G19Rik	0	0	0	0	0
2310081J21Rik	0	0	0	0	0
2400006E01Rik	0	0.153733	0.615957	0	0.723721
2410002F23Rik	64.0959	60.4277	53.4523	55.4104	58.2998
2410003L11Rik	0	0.399973	0.327913	1.0669	1.43193
2410004B18Rik	18.6802	14.9439	22.7369	21.1111	24.2874
2410004I01Rik	0	0	0	0	0
2410004P03Rik	0.323295	0.489563	0.63873	0.959933	0.755945
2410006H16Rik	31.6064	22.5456	41.1733	46.6602	34.7234
2410012E07Rik	0	0	0	0	0
2410015M20Rik	48.7063	46.6234	55.954	56.8365	77.142
2410016O06Rik	12.7109	10.3256	21.8607	21.6768	22.3416
2410017I17Rik	0	0	0	0	0
2410018L13Rik	1.47509	1.58698	0.822589	1.49805	1.44856
2410021H03Rik	0	0	0	0	0
2410089E03Rik	12.6873	15.7739	10.079	9.52743	6.24363
2410124H12Rik	0	0	0	0	0
2410127L17Rik	14.9183	8.77501	12.6812	10.9829	11.9413
2410131K14Rik	4.11112	4.77524	5.06548	5.37003	5.73417
2410137M14Rik	0	0	0	0	0
2410141K09Rik	0	0	0.166467	0.127727	0.14637
2500002B13Rik	0	0	0	0	0
2500004C02Rik	2.0231	1.73494	1.22593	1.20254	1.15837
2510002D24Rik	1.0673	0.786291	1.88854	1.27844	2.01376
2510003B16Rik	0	0	0	0	0
2510009E07Rik	0.110525	0.186896	0.286754	0.142622	0.221229
2510039O18Rik	29.0126	27.5202	36.7695	41.4301	42.2561
2610001J05Rik	2.68283	2.37207	4.43981	4.59037	6.92265
2610002M06Rik	10.4831	10.6639	15.2953	13.8243	13.0275
2610005L07Rik	0.10784	0	0.219914	0	0.160578
2610008E11Rik	3.57087	4.01886	4.29225	4.10935	2.69059
2610015P09Rik	9.66031	9.53557	9.65889	11.1457	9.00675
2610016A17Rik	0	0	0.085132	0	0
2610020C07Rik	1.62026	1.70217	2.46121	1.70809	2.0278
2610020H08Rik	23.2174	25.1351	16.4665	16.3289	12.595
2610027K06Rik	0.071673	0	0.017349	0.07304	0.089627
2610028E06Rik	0	0	0	0	0
2610028H24Rik	0.086074	0	0	0	0
2610035D17Rik	1.62786	1.24704	2.91618	2.63889	3.33276
2610035F20Rik	0	0	0	0	0
2610037D02Rik	0	0	0	0	0.024366
2610042L04Rik	0	0.156799	0	0.188624	0.070404
2610044O15Rik8	0.442506	0.646234	0.533735	0.576821	0.505848
2610100L16Rik	0	0	0	0	0
2610203C22Rik	0.065491	0	0	0.20714	0.106342
2610206C17Rik	0.071231	0.073477	0.094008	0.06621	0
2610301B20Rik	14.8213	15.081	19.2501	18.5623	15.0496
2610305D13Rik	0.333738	0.574488	0.535601	0.38822	0.627385
2610306M01Rik	5.72982	4.56936	1.93861	1.90851	1.70382
2610307P16Rik	0.094876	0.047395	0.096731	0.201083	0.050812
2610316D01Rik	0	0	0	0	0
2610318N02Rik	7.21036	6.33007	5.49163	5.22933	7.5216
2610507B11Rik	83.5122	87.0233	102.418	113.585	92.3355
2610507I01Rik	2.2701	2.4822	2.24186	2.22993	1.80984
2610524H06Rik	20.2735	16.4407	19.117	21.3803	26.1787
2610528A11Rik	0	0	0.16013	0.254478	0.234059
2610528J11Rik	0	0	0	0	0
2700029M09Rik	36.6495	43.9684	33.8369	32.5454	22.6715
2700038G22Rik	1.00408	0.817026	0.961445	0.690842	0.881651
2700046A07Rik	0.152094	0.255811	0.18871	0.19861	0.243359
2700046G09Rik	0.933493	0.674587	1.00451	0.991579	1.03005
2700049A03Rik	5.92729	6.18692	7.50042	6.50591	5.44904
2700054A10Rik	0.629173	0.488131	0.396288	0.723219	0.447599
2700060E02Rik	116.465	107.807	95.074	110.562	118.238
2700062C07Rik	11.0108	9.2038	12.3935	12.5663	13.5429
2700069I18Rik	0	0	0	0	0
2700070H01Rik	0.11558	0.048171	0.092446	0.133559	0.100079
2700081O15Rik	1.90596	10.4604	13.8075	13.4575	12.8357
2700089I24Rik	0	0	0	0	0
2700094K13Rik	97.7595	78.2598	87.3883	96.3327	129.054
2700097O09Rik	7.79944	6.07813	6.80196	7.28507	7.77951
2700099C18Rik	16.8375	8.01012	9.22312	10.9141	10.4778
2810001G20Rik	3.5723	3.53791	2.18335	2.11151	3.08581
2810002D19Rik	3.56946	2.65743	5.16594	3.44205	3.95976
2810004N23Rik	45.9968	41.9283	82.1304	80.7063	89.052
2810006K23Rik	3.16437	3.42075	3.32433	4.09873	4.01814
2810013P06Rik	5.17643	5.17842	4.28599	3.25126	3.54302
2810021J22Rik	8.87052	8.67974	9.01972	8.33492	9.05334
2810025M15Rik	12.443	11.0845	13.4801	13.4192	16.43
2810029C07Rik	1.55576	1.27415	0.328356	0.416204	0.471545
2810032G03Rik	0	0	0.160385	0.123579	0.489669
2810047C21Rik1	0	0	0	0	0
2810049E08Rik	0	0	0	0	0
2810403A07Rik	22.1606	26.719	17.7669	14.9053	16.0073
2810403D21Rik	0.121696	0	0	0	0
2810404M03Rik	0	0	0	0	0
2810405F15Rik	0	0	0	0	0
2810408A11Rik	1.93937	3.81994	1.79975	2.17121	1.04515
2810408I11Rik	9.97047	7.19882	7.05607	7.7704	9.46634
2810410L24Rik	0.841393	0.31842	2.39422	1.64409	0.936835
2810417H13Rik	1.83289	2.04898	0.507791	0.213569	0.580687
2810428I15Rik	157.486	159.054	79.4034	108.015	106.483
2810429I04Rik	0	0.384332	0.480638	1.42946	0
2810433D01Rik	0	0	0	0	0.062178
2810442N19Rik	0	0	0.12451	0	0
2810454H06Rik	0.171371	0.131743	0.085705	0.027172	0.037582
2810459M11Rik	0.316684	0.350973	0.193828	0.266902	0.212487
2810468N07Rik	0.510735	0.747394	0.239305	0.431441	0.653393
2810471M01Rik	0	0	0	0	0
2810474O19Rik	3.36976	3.2203	7.92009	6.19684	5.9747
2900005J15Rik	0.497319	0.682621	0.585541	0.496097	0.356858
2900008C10Rik	0.507353	0.246601	0.531855	1.10978	0.843273
2900009J06Rik	0	0	0	0	2.27842
2900011O08Rik	0.051934	0	0	0	0.112707
2900026A02Rik	0.450526	0.521527	1.30386	1.33335	1.04133
2900041M22Rik	0	0	0	0.057836	0
2900052N01Rik	0	0	0	0	0
2900055J20Rik	0.011792	0.005214	0.018342	0	0
2900057B20Rik	0	0	0	0	0
2900060B14Rik	0	0	0.067593	0.065102	0
2900076A07Rik	0.37517	0.246215	0.472514	0.402208	1.19819
2900079G21Rik	0	0	0	0	0
2900092C05Rik	0	0	0	0	0
2900092D14Rik	0	0	0	0	0
2900097C17Rik	22.6047	21.3312	31.4998	29.1435	27.8505
3000002C10Rik	0.799759	0.570915	0.594923	0.579335	0.891466
3010001F23Rik	0	0	0	0	0
3010026O09Rik	28.624	31.2128	26.3949	29.5454	35.7278
3100003L05Rik	0	0	0	0	0
3110001I22Rik	4.44334	4.87231	4.57381	4.47278	4.37773
3110002H16Rik	21.6984	25.4854	27.7779	24.4499	26.3284
3110009E18Rik	0	0	0.158286	0	0.131789
3110009F21Rik	0	0	0	0	0
3110015C05Rik	0	0	0	0	0
3110021A11Rik	0.196667	0.253904	0.193439	0.094334	0
3110021N24Rik	5.72996	5.69186	5.26859	4.60593	4.59142
3110035E14Rik	1.91656	2.38157	1.50087	1.87217	0.761047
3110039I08Rik	0.094936	0.055812	0	0.051718	0.08793
3110039M20Rik	0	0	0	0	0
3110040N11Rik	3.71833	3.84057	6.55139	7.105	9.0677
3110043O21Rik	28.3312	26.9609	26.624	23.7653	25.6095
3110045C21Rik	0.817101	1.17484	0.851124	0.914923	0.727679
3110052M02Rik	0.143067	0.138028	0.175452	0.136464	0.189725
3110056K07Rik	3.50545	1.09235	1.06723	3.06995	4.22028
3110057O12Rik	8.01827	9.99969	2.36756	1.39721	2.03854
3110062M04Rik	0.270876	0.297434	0.264451	0.291623	0.224749
3110070M22Rik	0.669024	1.28854	0.17708	0.376425	0.256875
3110079O15Rik	0	0	0	0	0
3110082I17Rik	6.75815	9.83605	10.077	13.2694	14.5427
3110082J24Rik	0.74281	1.04177	1.93984	1.85537	1.88936
3110099E03Rik	0	0	0	0	0
3200001D21Rik	0.050143	0	0.087081	0	0.101244
3300002I08Rik	0	0	0	0	0.407897
3300002P13Rik	0	0.115532	0.221718	0.06878	0.117578
3300005D01Rik	0	0	0	0	0
3425401B19Rik	0	0	0	0	0
3632451O06Rik	0.044507	0.251167	0.065712	0.056573	0.144881
3632454L22Rik	0.044825	0	0.044368	0.052348	0
3830403N18Rik	7.93593	7.14385	4.32026	4.14637	4.18696
3830406C13Rik	11.0818	4.51691	10.272	4.40808	8.74196
3830408C21Rik	0.554131	0.59491	0.233867	0.388294	0.297215
3830417A13Rik	3.33069	3.19447	3.36578	4.13653	4.0005
3830432H09Rik	0	0.052262	0.066447	0.0483	0.091626
3930402G23Rik	0	0	0	0	0
4430402I18Rik	0.147765	0.190531	0.255189	0.090301	0.523517
4631405J19Rik	0	0	0	0	0
4632404H12Rik	1.02303	1.23622	0.985452	0.641172	0.844326
4632415L05Rik	1.23077	1.62454	1.47546	1.46652	1.00943
4632427E13Rik	0	0	0	0.222857	0.176519
4632428C04Rik	0.033582	0.034207	0.03324	0.064029	0
4632428N05Rik	3.27933	3.30561	2.73083	2.59296	2.65446
4732416N19Rik	0	0	0	0	0
4732456N10Rik	0	0	0	0	0
4732471J01Rik	1.42052	1.64939	0.9038	0.444933	0.498936
4732490B19Rik	0.050002	0.034385	0.082487	0.031778	0.036171
4732491K20Rik	0.19062	0.24205	0.139848	0.182757	0.236239
4831407H17Rik	0	0	0	0	0
4831440E17Rik	0.200484	0.161848	0.060395	0.045289	0.103807
4833411C07Rik	0	0	0	0	0
4833412C05Rik	0.112931	0	0	0	0
4833415N18Rik	0	0	0	0	0
4833417C18Rik	0.366264	0.376668	1.04025	1.10003	0.855788
4833418N02Rik	0.284825	0.161567	0.076521	0	0.057827
4833419F23Rik	0.275336	0.332944	0.229017	0.302434	0.49349
4833420G17Rik	17.3142	18.6222	25.36	23.4433	22.9222
4833422C13Rik	0.043196	0	0	0	0
4833422M21Rik	0	0	0	0	0
4833423E24Rik	0	0	0	0	0
4833427F10Rik	0	0	0	0	0
4833427G06Rik	0	0	0	0	0
4833428L15Rik	0	0	0	0	0
4833439L19Rik	49.3203	44.7101	108.032	91.1448	108.294
4921501E09Rik	0	0	0	0	0
4921504A21Rik	0	0.029258	0	0	0.05027
4921504E06Rik	0	0	0	0	0
4921506M07Rik	0.996319	0.446823	0.674165	0.834532	1.0939
4921507L20Rik	0.478395	0.308182	0.335188	0	0
4921507P07Rik	4.13262	2.69311	1.18041	1.74611	1.37412
4921508D12Rik	0	0	0	0	0
4921509C19Rik	0	0	0	0	0
4921509O07Rik	0	0	0	0	0
4921511C10Rik	0	0	0	0	0
4921511C20Rik	0	0	0	0	0
4921511H03Rik	0	0	0	0	0
4921511I17Rik	0	0	0	0	0
4921511M17Rik	0	0	0	0	0
4921513I03Rik	0	0	0	0	0.056138
4921515E04Rik	0	0	0	0	0
4921517D22Rik	0.067124	0.123136	0.207415	0.123079	0.252724
4921518K17Rik	0	0	0	0	0
4921524J17Rik	8.65859	8.44045	12.7782	10.0234	11.5111
4921524L21Rik	0	0	0	0	0
4921525O09Rik	0	0	0	0	0
4921529L05Rik	0	0	0	0	0
4921530L21Rik	0	0	0	0	0
4921531C22Rik	2.89498	3.01716	4.34233	2.94437	3.9751
4921531P14Rik	3.22906	1.91738	2.3722	1.84816	3.0059
4921533I20Rik	0.040768	0.579288	0.279443	0.230279	0.35058
4921534H16Rik	0	0	0	0	0
4921536K21Rik	0.218012	0.128506	0.490922	0.369654	0.471437
4921539E11Rik	0	0	0	0	0
4922502D21Rik	0	0	0	0	0
4922502H24Rik	0	0	0	0	0
4922502N22Rik	0	0	0	0	0
4930401C15Rik	0	0	0	0	0
4930401O10Rik	0	0	0	0	0
4930401O12Rik	0	0	0	0	0
4930402F06Rik	0	0	0	0	0
4930402F11Rik	0	0	0	0	0
4930402H24Rik	12.0529	12.5667	21.7399	20.862	20.5673
4930402K13Rik	0.068672	0.023612	0.022657	0.021822	0
4930404A05Rik	0	0	0	0	0
4930404H11Rik	0	0	0	0	0
4930404I05Rik	0.697878	0.448623	0.247563	0.230068	0.405961
4930404N11Rik	8.09221	7.40679	7.5863	9.62703	9.20149
4930405A10Rik	0	0	0	0	0
4930405A21Rik	1.19854	1.59752	0.476806	0.273427	0.576863
4930405D11Rik	0	0	0	0	0
4930405J17Rik	0	0	0	0	0
4930405L22Rik	0	0	0	0	0
4930405O22Rik	0	0	0	0.02236	0
4930406D18Rik	0	0	0	0	0
4930407G08Rik	0	0	0	0	0
4930407I10Rik	0.042748	0.026997	0	0	0
4930407I19Rik	0	0	0	0	0
4930412B13Rik	0	0	0	0	0
4930412C18Rik	0	0.041853	0.070661	0.048962	0.122602
4930412O13Rik	0	0	0	0	0
4930413E15Rik	0	0	0	0	0
4930413F20Rik	0	0	0	0.106384	0
4930413G21Rik	5.32428	4.82851	7.77049	9.12872	9.11408
4930413M19Rik	0	0	0	0	0
4930414N06Rik	3.78907	1.5941	0	0.441372	0.08184
4930415F15Rik	0	0	0	0	0
4930415L06Rik	0	0	0	0	0
4930415O20Rik	0	0	0	0	0
4930417O13Rik	0	0	0	0	0
4930417O22Rik	0	0	0.068106	0	0.111993
4930419G24Rik	0	0	0	0	0
4930423M02Rik	0	0	0	0	0
4930425K10Rik	0	0	0	0	0
4930425L21Rik	0	0	0	0	0
4930425O10Rik	0.229285	0.1772	0.062606	0.164452	0.093591
4930426D05Rik	0	0	0	0	0
4930426L09Rik	0.082305	0.0849	0.027155	0	0.05805
4930427A07Rik	12.6505	12.1259	6.7588	8.07611	5.70416
4930428D20Rik	0	0	0	0	0
4930428E07Rik	0	0	0	0	0
4930428G15Rik	0	0	0	0	0
4930428O21Rik	0	0	0	0	0
4930429B21Rik	0.020907	0	0.041388	0.139518	0
4930429D17Rik	0	0	0	0	0
4930429F11Rik	0	0	0	0	0
4930429F24Rik	0	0	0	0	0.08731
4930430A15Rik	0	0	0	0	0
4930430F08Rik	2.97929	2.58241	4.03744	1.75193	2.6189
4930430F21Rik	0	0	0	0	0
4930430J02Rik	0	0	0	0	0
4930431F12Rik	0	0	0	0	0
4930431P03Rik	0	0	0	0	0
4930432J09Rik	0	0	0	0	0
4930432K21Rik	16.5421	18.7657	5.44872	9.3151	8.71266
4930432M17Rik	0	0	0	0	0
4930433B08Rik	0	0	0	0	0
4930433I11Rik	0	0	0	0	0
4930433N12Rik	1.87464	1.32874	0.763569	0.590812	0.239272
4930434J06Rik	0	0	0	0	0
4930435E12Rik	0	0	0	0	0
4930438E09Rik	0	0	0	0	0
4930440C22Rik	0	0	0	0	0
4930440I19Rik	0	0	0	0	0
4930441H08Rik	0	0	0	0	0
4930441J16Rik	0	0	0	0	0
4930442J19Rik	0	0	0	0	0
4930442L01Rik	0.476556	0.490557	0.17424	0.525526	0.280392
4930443O20Rik	0	0	0	0	0
4930444F02Rik	0	0	0	0	0
4930444G20Rik	0.043738	0.070881	0.020506	0.043891	0.032472
4930444M15Rik	0	0	0	0	0
4930444P10Rik	0	0	0	0	0
4930445N18Rik	0	0	0	0	0
4930447A16Rik	0	0	0	0	0
4930447C04Rik	67.8617	81.5688	22.4914	10.747	6.72318
4930447F24Rik	0.091203	0	0	0.057965	0
4930447J18Rik	0	0	0	0	0
4930447K03Rik	0	0	0	0	0
4930447M23Rik	0	0	0	0	0
4930447N08Rik	0	0	0	0	0
4930448C13Rik	0	0	0	0	0
4930448F12Rik	0	0	0	0	0
4930448H16Rik	0	0	0	0	0
4930448I06Rik	0	0	0	0	0
4930448I18Rik	0	0	0	0	0
4930448K20Rik	0.028449	0	0	0.008815	0
4930449E01Rik	0	0	0	0	0
4930449E18Rik	0	0	0	0	0
4930449I24Rik	0	0	0	0	0
4930451G09Rik	3.9254	3.62595	1.65227	1.90965	1.36117
4930451I11Rik	0	0	0	0	0
4930452A19Rik	0	0	0	0	0
4930452B06Rik	1.37137	1.41429	2.35509	3.62109	3.8784
4930452G13Rik	0	0	0	0	0.122881
4930452N14Rik	0	0	0	0	0
4930453H23Rik	0	0	0	0	0
4930453L07Rik	0	0	0	0	0
4930453N24Rik	26.6832	25.5985	28.3023	29.3979	32.1503
4930455B14Rik	0	0	0	0	0
4930455C13Rik	0.749286	0.475736	0.753271	0.638991	0.118401
4930455D15Rik	0	0	0	0	0
4930455F16Rik	0	0	0	0	0
4930455G09Rik	0.511984	0.133716	0	0.247158	0
4930455H04Rik	0	0	0	0	0
4930455J16Rik	0	0	0	0	0
4930456L15Rik	0	0	0	0	0
4930459C07Rik	0	0	0	0	0
4930459L07Rik	0	0	0	0	0
4930461G14Rik	0	0	0	0	0
4930463O16Rik	0	0	0	0	0
4930465K10Rik	0.997397	0.529002	0.381304	0.615937	0.276045
4930465M20Rik	0	0	0	0	0
4930467D21Rik	0.760234	0.896184	0.438886	0.5048	0.177244
4930467E23Rik	0	0	0.033813	0	0
4930467K11Rik	0	0	0	0	0
4930469G21Rik	0	0	0	0	0
4930470H14Rik	0	0	0	0	0
4930470O06Rik	0	0	0	0	0
4930470P17Rik	0.058449	0	0	0	0.124668
4930471C04Rik	0	0	0	0	0
4930471G03Rik	0	0	0	0	0
4930471M09Rik	0	0	0.052618	0	0
4930473A02Rik	0.133736	0	0	0	0
4930473O22Rik	0	0	0	0	0
4930474G06Rik	0	0	0	0	0
4930474H20Rik	0	0	0	0	0
4930474M22Rik	0	0	0	0	0
4930474N05Rik	0	0	0	0	0
4930474N09Rik	0	0.06868	0	0	0
4930477N07Rik	0	0	0	0	0
4930478L05Rik	0	0	0	0	0
4930478P22Rik	0	0	0	0	0
4930479D17Rik	0.78623	0.832176	0.466161	0.599344	0.776088
4930480E11Rik	0	0	0	0	0
4930480G23Rik	0	0	0	0	0
4930480K15Rik	0	0	0	0	0
4930480K23Rik	0.636968	0.723896	0.485882	0.362989	0.345147
4930480M12Rik	0	0	0	0	0
4930481A15Rik	1.37571	1.33721	1.46081	1.57083	1.36032
4930482G09Rik	0	0	0	0	0
4930483J18Rik	0.070804	0	0	0	0
4930483K19Rik	0.16665	0.125909	0.120473	0.034489	0.131185
4930483O08Rik	0	0	0	0	0
4930484H19Rik	0	0	0	0	0
4930486F22Rik	0	0	0	0	0
4930486I03Rik	0	0	0	0	0
4930486L24Rik	4.19953	2.43224	2.23474	3.08972	6.99162
4930487D11Rik	0	0	0	0	0
4930487H11Rik	0	0	0	0	0
4930488B22Rik	0	0	0	0	0
4930488L21Rik	0	0	0	0	0
4930500F04Rik	0	0	0	0	0
4930500L23Rik	0	0	0	0	0
4930502A04Rik	0	0	0	0	0
4930502E09Rik	0	0	0	0	0
4930502E18Rik	29.4112	32.5216	40.8945	39.6071	35.16
4930503B20Rik	0	0	0	0	0
4930503E14Rik	0	0	0	0	0.137276
4930503E24Rik	1.31854	1.33054	1.17456	1.42575	1.33865
4930503F20Rik	0	0	0	0	0
4930503H13Rik	0	0	0	0	0
4930503L19Rik	5.45358	5.78879	7.81662	6.1056	5.38908
4930503O07Rik	0	0	0	0	0
4930504C09Rik	0	0	0	0	0
4930504O13Rik	2.20188	1.47328	1.21294	2.11855	1.66964
4930505A04Rik	0	0	0	0	0
4930505G20Rik	0	0	0	0	0
4930505K13Rik	0	0	0	0	0
4930505K14Rik	0	0	0	0	0
4930506A18Rik	0.158631	0.190869	0.196269	0	0
4930506C21Rik	0.86628	0.763028	0.50994	0.450423	0.817813
4930507D05Rik	0.446396	0.401052	0.177926	0.185447	0.302863
4930507D10Rik	0	0	0	0	0
4930509E16Rik	2.13863	1.60746	1.98328	1.97999	2.14408
4930509J09Rik	0	0	0	0	0
4930509K18Rik	0	0	0	0	0
4930511A02Rik	0	0	0	0	0
4930511A08Rik	0	0	0	0	0
4930511E03Rik	0	0	0	0	0
4930511M06Rik	0	0.059948	0	0	0
4930512B01Rik	0	0	0	0	0
4930512J16Rik	0	0	0.043413	0	0
4930512M02Rik	0	0	0	0	0
4930513D17Rik	0	0	0	0	0
4930513N10Rik	1.76829	2.09291	1.25868	1.55608	1.30862
4930513O06Rik	0	0	0	0	0
4930515B02Rik	0	0	0	0	0
4930515G01Rik	0.325884	0.235312	0.703996	0.497083	1.04582
4930515G16Rik	0	0	0	0	0.047464
4930515L03Rik	0	0	0	0	0
4930515L19Rik	0	0	0	0	0
4930517E11Rik	0	0	0	0	0
4930517M08Rik	0	0	0	0	0
4930518J21Rik	0	0	0	0	0
4930518P08Rik	0	0	0	0	0
4930519D14Rik	0	0	0	0	0
4930519F09Rik	0.407022	0.12793	0.31342	0.138357	0.357907
4930519F16Rik	0	0	0	0	0
4930519F24Rik	0	0	0	0	0
4930519G04Rik	0	0	0	0	0
4930519H02Rik	0	0	0	0	0
4930519K11Rik	0	0	0	0	0
4930520O04Rik	0	0.06911	0.198945	0	0.363494
4930520P13Rik	0	0	0	0	0
4930521E06Rik	0	0	0	0	0
4930522H14Rik	0	0	0	0	0
4930522O17Rik	0	0	0	0	0
4930523C07Rik	1.09072	1.06647	0.198563	0.11441	0.28305
4930523O13Rik	0	0	0	0	0
4930524B15Rik	25.1487	26.9974	12.926	14.9645	15.1062
4930524B17Rik	0	0	0	0	0
4930524C18Rik	0	0	0	0	0
4930524N10Rik	0	0	0	0	0
4930524O05Rik	0	0	0	0	0
4930524O08Rik	0	0	0	0	0
4930525C09Rik	0	0	0	0	0
4930525D18Rik	0	0	0	0	0
4930525G20Rik	0	0	0	0	0
4930526H09Rik	0	0	0	0	0
4930526I15Rik	8.0498	8.83813	7.01448	6.71068	8.33284
4930526L06Rik	0	0	0	0	0
4930527F14Rik	0	0	0	0	0
4930527G23Rik	0	0	0	0	0
4930528A17Rik	0.153697	0.276459	0.188262	0.072346	0.104235
4930528D03Rik	0	0	0.048853	0	0.06873
4930528G23Rik	0	0	0	0	0
4930528H21Rik	0	0	0	0	0
4930528P14Rik	0	0	0	0	0
4930529C04Rik	0.934058	0.939532	0.920617	0.704809	0.753664
4930529K09Rik	0	0	0	0	0
4930529L06Rik	0	0	0	0	0
4930532I03Rik	0	0	0	0	0
4930532M18Rik	0	0	0	0	0
4930533B01Rik	0	0	0	0	0
4930533N22Rik	0	0	0	0	0
4930533P14Rik	0	0	0	0	0
4930538K18Rik	0.162638	0.139107	0.452522	0.464502	0.173537
4930539C22Rik	0	0	0	0	0
4930539E08Rik	2.77881	2.63436	2.66199	1.94203	2.52482
4930539J05Rik	7.60658	5.7757	7.40433	6.52075	9.08843
4930539M17Rik	0	0	0	0	0
4930539N22Rik	0	0	0	0	0
4930540M03Rik	0	0	0	0	0
4930542C21Rik	0	0	0	0	0
4930542D17Rik	0	0	0	0	0
4930543E12Rik	0	0	0	0	0
4930543N07Rik	0	0	0	0	0
4930544D05Rik	0	0	0	0	0
4930544G11Rik	0	0	0.027945	0	0.030635
4930544M13Rik	0	0	0	0	0
4930545E07Rik	0	0	0	0	0
4930545H06Rik	0	0	0	0	0
4930545L23Rik	0	0	0	0	0
4930546C10Rik	0	0	0	0	0
4930546K05Rik	0	0	0	0.04283	0
4930547E08Rik	0	0	0	0	0
4930547E14Rik	0	0	0	0	0
4930548G14Rik	0	0	0	0	0
4930548H24Rik	0.057139	0	0	0	0
4930548J01Rik	0	0	0	0	0
4930548K13Rik	0	0	0	0	0
4930549C01Rik	0	0	0	0	0
4930549C15Rik	0	0	0	0	0
4930549G23Rik	0	0.396701	0.446232	0	0
4930550C14Rik	0	0.180666	0.195729	0	0.385791
4930550C17Rik	0	0	0	0	0
4930550L24Rik	43.3051	41.0793	48.1511	49.5629	51.8182
4930552N02Rik	0	0	0	0	0
4930552P12Rik	0.309926	0.568633	0.2421	0.4467	0.230402
4930553C11Rik	0	0	0	0	0
4930553E22Rik	0	0	0	0	0
4930554C24Rik	0	0	0	0	0
4930554G24Rik	0	0	0	0	0
4930554H23Rik	0	0	0	0	0
4930554I06Rik	0	0	0	0	0
4930555B11Rik	0	0	0	0	0
4930555B12Rik	0	0	0	0	0
4930555G01Rik	0	0	0	0	0
4930555G21Rik	0	0	0	0	0
4930555K05Rik	0	0	0	0	0
4930556C24Rik	0	0	0	0	0
4930556G01Rik	0	0	0	0	0
4930556J02Rik	0	0	0	0	0
4930556M19Rik	0.232262	0.432265	0.235042	0.43285	0.363872
4930556N09Rik	0	0	0	0	0
4930556N13Rik	0	0	0.078051	0	0
4930557A04Rik	0	0	0	0	0
4930557F10Rik	0	0	0	0	0
4930557J02Rik	0	0	0	0	0
4930557K07Rik	0	1.10031	0.189803	0	0
4930558C23Rik	0	0	0	0	0
4930558F17Rik	0	0	0	0	0
4930558G05Rik	0	0	0	0	0
4930558J18Rik	3.88174	3.35036	5.22036	4.96153	4.50952
4930558K02Rik	0	0	0	0	0
4930559C10Rik	0	0	0	0	0
4930562C15Rik	0	0	0	0.020301	0.100193
4930562F07Rik	0	0	0	0	0
4930563D23Rik	0	0	0	0	0.016513
4930563E18Rik	0.078754	0	0.103934	0	0
4930563E22Rik	0.270106	0.190403	0.231422	0.444614	0.10582
4930563F08Rik	0	0	0	0	0
4930563H07Rik	0	0	0	0	0
4930563M20Rik	0	0	0	0.417911	0
4930563M21Rik	0	0	0	0	0
4930564B18Rik	0	0	0	0	0
4930564C03Rik	0	0	0	0	0
4930564D02Rik	0	0	0	0	0
4930565D16Rik	0	0	0	0	0
4930565N06Rik	0.6679	1.23756	1.16068	0.446455	0.309441
4930567H12Rik	0	0	0	0	0
4930567H17Rik	0	0	0	0	0
4930567J20Rik	0	0	0	0	0
4930567K12Rik	0	0	0	0	0
4930567K20Rik	0	0	0	0	0
4930568D16Rik	0	0	0	0	0
4930568E12Rik	0	0	0	0	0
4930568G15Rik	0	0	0	0	0
4930570G19Rik	0	0	0	0	0
4930571K23Rik	0	0	0	0.0176	0
4930571O06Rik	0	0	0	0	0
4930572K03Rik	0	0	0	0	0
4930572O03Rik	0	0	0	0	0
4930572O13Rik	0	0	0	0	0
4930573O16Rik	0	0	0	0	0
4930577N17Rik	0.433435	0.663135	0.342398	0.378934	0.578261
4930578C19Rik	0	0	0	0	0
4930578E11Rik	0	0	0	0	0
4930578I06Rik	0	0	0	0	0
4930578M01Rik	0	0	0	0	0
4930578N18Rik	0	0	0	0	0
4930579F01Rik	0	0	0	0	0
4930579G18Rik	0.11092	0	0.290528	0	0.200061
4930579G24Rik	15.4811	15.4689	5.21285	4.15896	4.4226
4930579H20Rik	0	0	0	0	0
4930579J19Rik	0	0	0	0	0
4930579K19Rik	0.384855	0.474563	0.874835	0.536427	0.840009
4930579P08Rik	0	0	0	0	0
4930581F22Rik	0.116263	0	0.067198	0.063226	0.091624
4930583K01Rik	0.32319	0.142877	0.137098	0	0.150296
4930583P06Rik	0	0	0	0	0
4930584F24Rik	0	0	0	0	0
4930586N03Rik	0	0	0	0	0
4930587E11Rik	0	0	0	0	0
4930590J08Rik	0	0	0	0	0
4930590L20Rik	0	0	0	0	0
4930591A17Rik	0	0	0	0	0
4930591E09Rik	0	0	0	0	0
4930592A05Rik	0	0	0	0	0
4930592I03Rik	0	0	0	0	0
4930593A02Rik	0	0	0	0	0
4930593C16Rik	0	0	0	0	0
4930594C11Rik	1.35234	1.37895	1.15199	1.1441	1.31528
4930594O21Rik	0	0.077233	0	0	0
4930595D18Rik	0	0	0	0	0
4930595M18Rik	0.107893	0.158993	0.106031	0.176328	0
4930596D02Rik	0	0	0	0	0
4930596I21Rik	0	0	0	0	0
4930597A21Rik	0	0	0	0	0
4930597G03Rik	0	0	0	0	0
4930598F16Rik	0	0	0	0	0
4930599N23Rik	8.62348	9.8104	7.20046	9.02885	9.05434
4931402G19Rik	0	0	0.349203	0.363315	0.078839
4931403E22Rik	0	0	0	0	0
4931403G20Rik	0	0	0	0	0
4931406B18Rik	0	0	0	0	0
4931406C07Rik	21.8999	21.8702	33.7006	28.339	27.272
4931406H21Rik	0	0	0	0	0
4931406P16Rik	58.5929	56.4778	47.1438	45.2328	42.7874
4931408C20Rik	0	0	0	0	0
4931408D14Rik	0.175844	0.373016	0.137	0.143047	0.054614
4931409K22Rik	0	0	0	0	0
4931414P19Rik	1.41348	1.30838	3.81766	3.47352	4.1091
4931417E11Rik	0	0	0	0	0
4931419H13Rik	0	0	0	0	0
4931420L22Rik	0	0	0	0	0
4931423N10Rik	0	0.057076	0	0	0.096063
4931428F04Rik	7.11749	7.2686	7.61167	8.22253	6.81176
4931428L18Rik	0	0.07688	0.253207	0.176743	0.284368
4931429I11Rik	0	0	0	0	0
4931429L15Rik	0	0	0	0	0
4931429P17Rik	0	0	0	0	0
4931430N09Rik	0	0	0	0	0
4931431B13Rik	0	0	0	0	0
4931431C16Rik	0	0	0.059017	0	0.032349
4931431F19Rik	0	0	0	0	0
4931440F15Rik	0.421815	0.422591	0.355582	0.23653	0.253345
4931440J10Rik	0	0	0	0	0
4931440P22Rik	1.13912	0.980798	0.309304	0.519419	0.595107
4932411E22Rik	0	0	0	0	0
4932411N23Rik	0	0	0	0	0
4932412D23Rik	0	0.071711	0.107424	0.112905	0.096988
4932413F04Rik	0	0	0	0	0
4932414J04Rik	0	0	0	0	0
4932414N04Rik	0	0	0	0	0
4932415M13Rik	0	0	0	0	0
4932416H05Rik	1.27348	1.254	0.8932	0.973614	0.875669
4932416K20Rik	0	0	0	0.01093	0
4932418E24Rik	0	0	0	0	0
4932429P05Rik	0	0	0	0	0
4932435O22Rik	0	0	0.023723	0	0
4932438A13Rik	20.5033	22.1157	23.1182	22.9822	14.6508
4932438H23Rik	0	0	0	0	0
4932441J04Rik	0	0	0	0	0
4932443I19Rik	0	0	0	0	0
4932702P03Rik	0	0	0	0	0
4933400A11Rik	0	0	0	0	0
4933400B14Rik	0	0	0	0	0
4933400C23Rik	0	0	0	0	0
4933400F21Rik	0	0	0	0	0
4933400L20Rik	0	0	0	0	0
4933401B06Rik	0	0	0.066207	0	0
4933401D09Rik	0	0	0	0	0
4933401H06Rik	0	0	0	0	0
4933402C06Rik	0	0	0	0	0
4933402D24Rik	0	0	0	0	0
4933402E13Rik	38.0477	42.2113	21.4458	26.1137	12.8533
4933402J07Rik	0.849842	1.04083	2.75642	2.3027	1.80169
4933402J10Rik	0	0	0	0	0
4933402J15Rik	0	0	0	0	0
4933402N03Rik	0	0	0	0	0
4933402N22Rik	0	0	0	0	0
4933402P03Rik	0	0	0	0	0
4933403O08Rik	4.99209	3.8865	7.76545	5.80579	6.49808
4933404G15Rik	0	0	0	0	0
4933404K08Rik	0	0	0	0	0
4933404K13Rik	0.147177	0.708484	0.485593	0.368311	0.995118
4933404O12Rik	1.49785	1.37194	0.708968	0.657735	0.534301
4933405D12Rik	0	0	0	0	0
4933405E24Rik	0	0	0	0	0
4933405L10Rik	0	0	0	0	0
4933405O20Rik	0	0	0	0	0
4933406C10Rik	0	0	0	0	0.079027
4933406D12Rik	0	0	0	0	0
4933406F09Rik	0	0	0	0	0
4933406G16Rik	0	0	0	0	0
4933406I18Rik	0	0	0	0	0
4933406J08Rik	14.3813	15.6335	7.0053	7.21037	4.52482
4933406J10Rik	0	0	0	0	0
4933406K04Rik	0	0	0	0	0
4933406M09Rik	0	0	0	0	0
4933407E24Rik	0	0	0	0	0
4933407G14Rik	0	0	0	0	0
4933407I05Rik	0	0	0	0	0
4933407K13Rik	0.102645	0.130795	0.442328	0.36231	0.327095
4933407L21Rik	0	0.070883	0	0	0
4933408B17Rik	0.274443	0.301459	0.1528	0.081039	0
4933408J17Rik	0	0	0	0	0
4933408N05Rik	0	0	0	0	0
4933409G03Rik	0	0	0	0	0
4933409K07Rik	0	0	0	0	0
4933411E08Rik	0.071775	0	0.047362	0	0
4933411G06Rik	0	0	0	0	0
4933411K16Rik	0	0	0	0	0.031575
4933412E12Rik	0.378359	0.631779	0.648734	0.583886	1.02446
4933412E24Rik	0.093025	0.167926	0.251485	0	0.05047
4933412O06Rik	0	0	0	0	0
4933413G19Rik	0	0	0	0	0
4933413J09Rik	0.096293	0.037249	0	0.057374	0.039183
4933413L06Rik	0	0	0	0	0
4933415F23Rik	0.06224	0.067155	0.279843	0.239635	0.422004
4933416C03Rik	62.3812	58.5074	41.2729	40.6115	34.8751
4933416E03Rik	0	0	0	0	0
4933416I08Rik	0.155869	0.066645	0	0.085889	0
4933416M06Rik	0	0	0	0	0
4933416M07Rik	0.212558	0.192976	0.310119	0.204556	0.493304
4933417A18Rik	0	0	0	0	0
4933417D19Rik	0.530653	0.725443	0.921096	0.949064	1.23776
4933417E11Rik	0	0	0	0	0
4933417G07Rik	0.965114	0.99828	0.980474	1.30024	1.59848
4933417O13Rik	0	0	0.026443	0.025469	0
4933421I07Rik	0	0	0	0	0
4933421O10Rik	0.61678	0.558539	0.416756	0.533364	0.589678
4933422A05Rik	0	0	0	0	0
4933424G05Rik	0	0	0	0	0
4933424G06Rik	0	0	0	0	0
4933425B07Rik	0	0	0	0	0
4933425L06Rik	0.149461	0.097481	0.242734	0.450009	0.69627
4933427D06Rik	135.666	127.484	38.977	37.2205	31.6764
4933427D14Rik	2.60417	4.09504	2.65039	2.52611	1.90635
4933427E11Rik	0.423129	0.242483	0.241817	0.192088	0.182197
4933427E13Rik	0	0	0	0	0
4933427G17Rik	0.732873	0.781664	0.642365	0.304062	0.399381
4933427I22Rik	0	0	0	0	0
4933428C19Rik	0	0	0	0	0
4933428G20Rik	0.143046	0.37121	0.336222	0.237263	0.450134
4933429K18Rik	0	0	0	0	0
4933429O19Rik	0	0	0	0	0
4933430H16Rik	0	0	0	0	0
4933430I17Rik	0.51992	0.165101	0	0.063759	0.220814
4933430M04Rik	0	0	0	0	0
4933430N04Rik	0	0	0	0	0
4933431E20Rik	0.302223	0.400301	0.606293	0.487108	0.843232
4933431G14Rik	0	0	0	0	0.052979
4933432G23Rik	0	0	0	0	0
4933432I03Rik	0	0	0	0	0
4933432I09Rik	0.135083	0.083606	0.160448	0.077268	0
4933432K03Rik	0	0	0	0	0
4933433C11Rik	0.498637	0.141258	0.082816	0.436766	0.422058
4933433F19Rik	0	0	0	0	0
4933433G08Rik	0	0	0	0	0
4933433G15Rik	0.348242	0	0.164565	0.246763	0.145998
4933433G19Rik	0.152878	0	0	0	0
4933433H22Rik	0	0	0	0	0
4933434E20Rik	17.3182	17.4542	21.3404	19.6817	23.1667
4933436E23Rik	0	0	0	0	0
4933436H12Rik	0	0	0	0	0
4933436I01Rik	0	0	0	0	0
4933438B17Rik	0	0	0	0	0
4933438K21Rik	0	0	0	0	0
4933439C10Rik	0.801405	0.802647	0.661148	0.891026	0.633981
4933439K11Rik	0	0	0	0	0
4933440J02Rik	0	0	0	0	0
4933440M02Rik	0.046725	0	0	0	0
5031410I06Rik	0	0	0	0	0
5031414D18Rik	0.291037	0.269676	0.196892	0.262794	0.244855
5031425E22Rik	2.19773	1.97921	1.6527	1.27771	1.96383
5031425F14Rik	0	0	0	0	0
5031426D15Rik	0.008091	0	0.006702	0.006455	0.012858
5031434C07Rik	0	0	0	0	0
5031434O11Rik	0	0	0	0	0
5031439G07Rik	11.4355	10.7076	15.4469	15.6631	18.193
5033403F01Rik	0.490627	0.399048	0.338781	0.389112	0.3229
5033403H07Rik	0	0	0	0	0
5033404E19Rik	0	0	0	0	0.062393
5033406O09Rik	0	0	0.186383	0	0.204044
5033428I22Rik	0	0	0	0	0
5330411J11Rik	0	0	0	0	0
5330413P13Rik	0	0	0	0	0
5330417C22Rik	0	0.036226	0.107373	0	0
5330426P16Rik	0.089847	0.068255	0	0.042292	0.07312
5330434G04Rik	0	0	0	0	0
5330439B14Rik	0	0	0	0	0
5430401F13Rik	0	0	0	0	0
5430402E10Rik	0	0	0	0	0
5430402O13Rik	0.920938	0.541852	1.37454	0.769015	1.88129
5430403N17Rik	0	0	0	0	0
5430405H02Rik	0.13409	0.337858	0.348037	0.082419	0.292424
5430416N02Rik	3.22559	1.61564	2.66708	2.66037	4.76507
5430416O09Rik	0.129708	0.142224	0.04938	0.141727	0.172683
5430419D17Rik	0	0	0	0	0
5430421F17Rik	0	0	0	0	0
5430421N21Rik	0	0	0	0	0
5430425K12Rik	0	0	0	0	0
5430427M07Rik	0	0	0	0	0
5430427O19Rik	0	0	0	0	0
5430428K19Rik	0	0	0	0	0
5430431A17Rik	0	0	0	0	0
5430434I15Rik	0	0	0	0	0
5430437J10Rik	0	0	0	0	0
5430440P10Rik	0	0.082782	0	0	0
5530400C23Rik	0	0	0	0	0
5530401A14Rik	0	0	0	0	0
5530601H04Rik	1.53395	1.97036	2.39863	2.39557	2.41899
5730403I07Rik	2.1988	2.19637	1.85223	2.06432	2.05722
5730405O15Rik	0	0	0	0	0
5730408K05Rik	0.080185	0.418972	0.417713	0.303638	0.679687
5730409E04Rik	1.23947	1.48219	4.42042	4.46138	4.94793
5730412P04Rik	0	0	0	0	0
5730416F02Rik	0	0.025896	0	0.095728	0.163438
5730420D15Rik	0	0	0	0	0
5730422E09Rik	0	0	0.011765	0.033267	0.023859
5730435O14Rik	0	0	0	0	0
5730455P16Rik	9.84354	9.06167	10.5364	9.37078	9.26143
5730457N03Rik	0	0	0	0	0
5730460C07Rik	0	0	0	0	0
5730480H06Rik	0.117488	0	0.09031	0	0.076173
5730488B01Rik	0	0	0	0	0
5730507C01Rik	4.31406	3.69928	3.9361	2.63313	2.80419
5730508B09Rik	24.2423	20.1553	8.3764	9.07209	8.52112
5730522E02Rik	0.052972	0.165309	0.079643	0.225651	0.174621
5730559C18Rik	0	0.040128	0.066964	0.101905	0.305572
5830411N06Rik	0	0	0	0	0
5830415F09Rik	17.7813	14.7106	12.199	14.8113	18.3587
5830416I19Rik	0	0	0	0	0
5830416P10Rik	0	0	0	0	0
5830417I10Rik	17.598	21.5982	18.1366	18.5493	14.4198
5830418P13Rik	0	0	0	0	0
5830428M24Rik	0	0	0	0	0
5830432E09Rik	0	0	0	0	0
5830444B04Rik	0	0	0	0	0
5830454E08Rik	0.10974	0.676367	0.488795	0.417165	0.476309
5830473C10Rik	0	0	0	0	0
5930403L14Rik	0.100179	0.051854	1.19079	0.90027	1.0395
5930412G12Rik	0	0	0	0	0
5930430L01Rik	0.032072	0	0.161765	0.058518	0.15458
5930438M14Rik	0	0	0	0	0
6030407O03Rik	0	0	0	0	0
6030408B16Rik	0.602148	0.764588	0.934452	1.11572	1.70994
6030419C18Rik	0.057178	0.191534	0.314692	0.217425	0.513413
6030440G07Rik	0	0	0	0	0
6030443J06Rik	0.105244	0.097256	0.088423	0.218866	0.14259
6030458C11Rik	30.8078	30.8837	32.5319	30.2964	24.4462
6030466F02Rik	0	0	0	0	0
6030468B19Rik	0	0.105831	0	0	0
6030469F06Rik	0	0	0	0	0
6030471H07Rik	0	0	0	0	0
6030498E09Rik	0	0	0	0	0
6230400D17Rik	0.486182	0.308252	0.217898	0.250055	0.279532
6330403A02Rik	0	0.019241	0.012309	0	0.026818
6330403K07Rik	0.048472	0	0.149618	0.048643	0.110731
6330407A03Rik	0	0	0	0	0
6330408A02Rik	7.28111	7.63632	4.96153	5.7137	5.60809
6330409D20Rik	0	0	0	0	0
6330410L21Rik	0	0	0	0.013394	0
6330415B21Rik	0	0	0	0	0
6330415G19Rik	0.594635	0.62963	0.74537	0.754541	0.734981
6330416G13Rik	3.19423	2.92663	3.99518	3.53017	3.78103
6330418K02Rik	1.29756	1.17014	1.60941	1.34527	1.71933
6330549D23Rik	2.57198	2.30046	2.25361	2.02282	2.98265
6430411K18Rik	0	0	0	0	0
6430503K07Rik	0	0	0	0	0
6430531B16Rik	0	0	0	0	0
6430548M08Rik	17.1285	17.3712	5.66082	7.12555	4.80147
6430550D23Rik	0.410838	0.365069	0.129267	0.330451	0.212566
6430562O15Rik	0.555542	0.665809	0.879673	0.781024	1.12623
6430571L13Rik	0.125404	0.115351	0.69803	0.44432	0.621436
6430573F11Rik	0	0	0	0	0.072718
6430584L05Rik	0	0.040038	0	0	0
6430706D22Rik	0	0	0	0	0
6430710C18Rik	0	0	0	0	0
6530402F18Rik	0	0	0	0	0
6530403H02Rik	0	0	0	0	0
6530411M01Rik	0	0	0	0	0
6720468P15Rik	0.095756	0	0.165866	0.151762	0.181833
6720483E21Rik	0	0	0	0	0
6720489N17Rik	0.284589	0.362257	0.265908	0.119215	0.093838
6820408C15Rik	2.94121	2.75717	2.12381	2.25188	2.30977
6820431F20Rik	0	1.02827	0	0	0.916587
7420426K07Rik	0	0	0	0.025842	0
7420461P10Rik	0	0	0	0	0
7420700N18Rik	0	0	0	0	0
7420701I03Rik	0	0	0	0	0
7530416G11Rik	0	0	0	0	0
7630403G23Rik	0	0	0	0	0
8030411F24Rik	4.51884	6.57566	0	0	0
8030423F21Rik	0	0	0	0	0
8030423J24Rik	0	0	0	0	0
8030442B05Rik	0	0	0	0	0
8030443G20Rik	0	0	0	0	0
8030451O07Rik	0	0	0	0	0
8030455M16Rik	0	0	0	0	0
8030462N17Rik	38.5324	38.4483	28.9334	23.3544	26.796
8430408G22Rik	0	0	0	0	0
8430419L09Rik	8.10545	7.40247	6.93326	7.30025	7.96022
8430422H06Rik	0	0	0	0	0
8430423G03Rik	0	0	0	0	0
8430426J06Rik	0	0	0	0	0
8430429K09Rik	2.05282	2.06196	4.83292	3.86786	3.36435
8430430B14Rik	0.280514	0.322699	0	0.3794	0
8430431K14Rik	0	0	0	0	0
8430436N08Rik	0	0	0	0	0
8430437L04Rik	0	0	0	0	0
9030025P20Rik	0.987934	2.11976	0.706815	1.05259	1.97494
9030204H09Rik	0	0	0	0	0
9030404E10Rik	0	0	0	0	0
9030612E09Rik	0.108089	0.067574	0.128601	0.195682	0.043835
9030617O03Rik	0	0	0	0.036109	0.060964
9030619P08Rik	0	0	0	0	0
9030624G23Rik	3.44779	4.13093	3.29462	3.78557	3.13383
9030624J02Rik	52.861	40.304	47.299	49.5785	55.218
9030625G05Rik	0	0	0	0	0
9130008F23Rik	0	0	0	0	0
9130011E15Rik	9.81634	9.98756	18.0975	15.2527	14.3031
9130015A21Rik	0	0	0	0	0
9130015L21Rik	0	0	0	0	0
9130019O22Rik	1.6911	1.68368	1.0011	1.15165	0.857726
9130019P16Rik	0.106555	0	0.12166	0.170027	0.164682
9130023H24Rik	3.32808	3.21907	1.71791	1.87821	1.45213
9130024F11Rik	0.141617	0.033842	0.097419	0.084706	0.071198
9130204L05Rik	0	0	0	0	0
9130209A04Rik	0	0	0	0	0
9130221F21Rik	0	0	0	0	0
9130221H12Rik	10.5824	10.4965	10.878	11.4116	10.9029
9130227L01Rik	0	0	0	0	0
9130230L23Rik	0	0	0	0	0
9130401M01Rik	24.5324	23.9873	28.81	32.3582	37.6716
9130409I23Rik	0	0	0	0	0
9130409J20Rik	0	0	0	0	0
9230009I02Rik	0	0	0	0	0
9230102K24Rik	0	0	0	0	0
9230102O04Rik	0	0	0	0	0
9230104L09Rik	0	0	0	0	0
9230105E05Rik	0	0	0	0	0
9230110C19Rik	19.5624	18.264	28.095	25.9118	23.5388
9230110F15Rik	0	0	0	0	0
9230112D13Rik	0	0	0	0	0
9230112J17Rik	0	0	0	0	0
9230114K14Rik	3.80884	3.7702	1.71832	0.818733	1.31694
9230116L04Rik	0.17299	0.0789	0.075709	0.216846	0
9230116N13Rik	0.446661	0.359471	0.461834	0.309546	0.523696
9230117E06Rik	0	0	0	0	0
9330020H09Rik	0.204495	0.171748	0.246731	0.14739	0.296485
9330102E08Rik	4.75075	4.492	6.51663	6.30317	5.23965
9330111N05Rik	0	0	0	0	0
9330117O12Rik	0	0	0	0	0
9330133O14Rik	1.04883	0.711452	1.41006	1.10941	1.08711
9330136K24Rik	0	0.050675	0.06519	0	0
9330151L19Rik	1.58342	1.13193	1.66208	1.25652	1.23468
9330158H04Rik	0	0	0	0	0
9330159F19Rik	0	0	0	0	0
9330159M07Rik	0.143488	0.124614	0.224752	0.190497	0.267788
9330162012Rik	0.249941	0.114588	0.16493	0.28858	0.329218
9330162B11Rik	0	0	0	0	0
9330175E14Rik	0	0	0	0	0
9330175M20Rik	0	0	0	0	0
9330178D15Rik	0	0	0	0	0
9330179D12Rik	0	0	0	0	0
9330182L06Rik	0.923272	0.779109	2.23547	1.72242	2.72398
9330182O14Rik	0	0	0	0	0
9330188P03Rik	0	0	0	0	0
9330199G10Rik	0	0	0	0	0
9430007A20Rik	0	0	0	0	0
9430014N10Rik	0	0	0	0	0
9430015G10Rik	12.098	12.0962	11.5969	14.0856	9.59822
9430016H08Rik	13.934	10.0223	16.8685	15.7406	20.9702
9430018G01Rik	0.059733	0	0.107903	0.132874	0.086422
9430019J16Rik	0	0	0	0	0
9430020K01Rik	26.9154	25.2828	20.6656	22.6585	20.2134
9430021M05Rik	0	0	0	0	0.040674
9430037G07Rik	0.123564	0.125364	0.194545	0.16245	0
9430038I01Rik	4.56014	4.72402	3.42998	2.42694	3.10152
9430041J12Rik	0.06877	0.198718	0.190681	0.184494	0.056923
9430060I03Rik	0	1.19973	0	0	2.47909
9430065F17Rik	0.186508	0.192389	0	0.107761	0.122654
9430069I07Rik	0	0	0	0	0
9430076C15Rik	0	0	0	0.025662	0
9430078K24Rik	0.10295	0.070797	0.202952	0.130861	0
9430083A17Rik	0.203159	0.196203	0.107967	0.116987	0.103196
9430091E24Rik	0.469813	0.893452	0.075538	0.142236	0.925864
9530002B09Rik	0.197663	0.458767	0.146738	0	0.372827
9530003J23Rik	0	0	0	0	0
9530014B07Rik	0	0	0	0	0
9530020I12Rik	0	0	0	0	0
9530026F06Rik	0	0	0	0	0
9530026P05Rik	0	0	0	0	0
9530027J09Rik	0.502672	0	0.830298	0	1.03271
9530036O11Rik	0.02715	0	0	0	0
9530051G07Rik	0.137618	0.047636	0.136902	0.131857	0.138305
9530052E02Rik	0	0	0	0	0
9530053A07Rik	0	0.007569	0	0	0
9530059O14Rik	0	0	0	0	0
9530062K07Rik	0.207736	0.242857	0.448638	0.148531	0.204757
9530068E07Rik	58.7473	56.5043	91.0652	80.0688	96.9943
9530077C05Rik	3.37086	3.73904	3.81847	3.78381	4.53843
9530080O11Rik	0.32756	0.704824	0.249742	0.277315	0.754975
9530082P21Rik	2.40902	2.47906	5.0853	5.67839	6.11302
9530091C08Rik	0.001703	0	0.005058	0	0
9630001P10Rik	0	0.044881	0.071776	0.069131	0
9630013A20Rik	0	0	0	0	0
9630013K17Rik	0.390977	0	0.437232	0.352239	0.262436
9630028B13Rik	0	0	0.037616	0	0
9630028H03Rik	0	0	0	0	0
9630028I04Rik	0	0.048919	0.108353	0.052746	0.222988
9830107B12Rik	0	0	0	0	0
9830132P13Rik	0	0	0	0	0
9830147E19Rik	0.87117	0.907604	0.727499	0.72251	0.678122
9830166K06Rik	0	0	0	0	0
9930012K11Rik	0.102639	0.082429	0.101593	0.233046	0.066824
9930014A18Rik	0	0	0	0	0.02587
9930021J03Rik	24.8867	25.4704	26.2084	24.1162	20.1968
9930104L06Rik	7.03812	8.4612	8.68743	9.91273	7.75436
9930111H07Rik	0	0	0	0	0
9930111J21Rik1	0	0	0	0	0
9930111J21Rik2	0	0	0	0	0
a	0	0	0	0	0
A130010J15Rik	5.22624	4.94921	4.7589	3.90835	3.28591
A130077B15Rik	0	0	0	0	0
A1bg	0	0	0	0	0
A1cf	0	0	0	0	0
A230001M10Rik	0	0	0	0	0
A230009B12Rik	0	0	0	0	0
A230020J21Rik	0	0.051005	0	0	0
A230028O05Rik	0	0.030114	0	0	0
A230046K03Rik	12.4072	13.1158	13.0068	8.43697	7.99886
A230050P20Rik	0.731076	1.29059	0.671225	1.51837	0
A230056J06Rik	0.024882	0.04	0	0	0.028052
A230056P14Rik	0.225146	0.943177	0.540763	0.189058	0.198904
A230057D06Rik	0	0	0	0	0
A230065H16Rik	0.62052	0	0.245678	0.177468	0.471326
A230070E04Rik	0	0	0	0	0
A230072C01Rik	0.42299	0.731366	0.498428	0.616877	0.660062
A230072E10Rik	0.08674	0.017448	0.073591	0	0
A230077H06Rik	0	0	0	0	0
A230103J11Rik	1.75642	1.05207	0.295578	0.408336	0.537561
A230108P19Rik	0.13005	0.100508	0	0.031093	0.03539
A2m	0	0	0	0	0
A330009N23Rik	0.138789	0.150514	0.111737	0	0.094564
A330015K06Rik	0	0	0	0	0
A330023F24Rik	0.030344	0.02388	0.037644	0.014962	0
A330032B11Rik	0	0	0	0	0
A330033J07Rik	0	0	0	0.027603	0
A330035P11Rik	0.780328	0.949245	1.19182	1.02287	0.919888
A330040F15Rik	0	0	0	0.067451	0
A330041J22Rik	0.4213	0.417961	0.47876	0.955742	0.761449
A330048O09Rik	0	0	0	0	0
A330049N07Rik	0	0	0	0	0
A330050F15Rik	0	0	0	0	0
A330069E16Rik	1.51102	1.20991	0.584707	0.389963	0.59016
A330070K13Rik	0	0	0	0	0
A330074K22Rik	0	0	0	0	0
A330076C08Rik	0	0	0.062497	0	0
A330076H08Rik	0	0	0	0	0
A330093E20Rik	0	0	0	0.366446	0
A330102I10Rik	0	0	0	0	0
A3galt2	0.048104	0.024811	0.083324	0.103183	0.141953
A430005L14Rik	31.104	30.3211	19.1942	23.09	19.4418
A430033K04Rik	6.62688	5.68778	11.875	9.57365	11.1722
A430035B10Rik	0.146879	0.209748	0.102653	0.098369	0.089686
A430046D13Rik	0.8538	0.827165	0.651151	0.499349	0.447416
A430078G23Rik	0.0821	0.095803	0.050524	0.102506	0
A430078I02Rik	0.051394	0.045694	0	0	0
A430085M09Rik	0	0	0	0	0
A430088P11Rik	0.283596	0.283544	0.554095	0.63697	0.437194
A430089I19Rik	0	0	0	0	0
A430090L17Rik	0	0	0	0	0
A430093F15Rik	0	0	0	0	0
A430105I19Rik	0.574652	0.477963	0.2383	0.554118	0.412731
A4galt	0	0	0.075709	0	0
A4gnt	0	0	0	0	0
A530006G24Rik	0	0	0	0	0
A530013C23Rik	0	0	0	0	0
A530016L24Rik	0	0	0	0	0
A530032D15Rik	0	0	0	0	0
A530046M15Rik	0	0	0	0	0
A530050N04Rik	0	0	0	0	0
A530053G22Rik	0	0	0	0	0
A530058N18Rik	0	0	0	0	0
A530064D06Rik	0	0.029511	0.081414	0	0
A530065N20Rik	0	0	0	0	0
A530072M11Rik	0.242143	0.227071	0.304498	0.293276	0.429355
A530088E08Rik	0.044856	0	0	0	0.024029
A530099J19Rik	0	0	0	0	0
A630001G21Rik	0.182457	0.192782	0.104217	0.080301	0
A630010A05Rik	0	0	0	0	0
A630012P03Rik	0	0	0	0	0
A630019I02Rik	0	0	0	0	0
A630020A06	0	0	0	0	0.025092
A630023A22Rik	0	0	0.181496	0.145673	0.2313
A630023P12Rik	0	0	0	0	0
A630033H20Rik	0	0	0	0	0
A630066F11Rik	1.42998	2.44837	1.24552	0.928216	1.71759
A630072M18Rik	2.07721	1.77076	2.39692	1.92353	2.4355
A630073D07Rik	0.412736	0	0	0.312914	0.274198
A630075F10Rik	0	0	0	0	0
A630076J17Rik	0	0	0	0	0
A630077J23Rik	0	0	0	0	0
A630089N07Rik	0.483726	0.432001	0.260055	0.275509	0.257281
A630095E13Rik	0	0	0	0	0
A630095N17Rik	0	0	0	0	0
A730004F24Rik	0	0	0	0	0
A730006G06Rik	0	0	0	0	0
A730008H23Rik	3.13545	1.01595	1.39239	1.34826	1.84733
A730017C20Rik	1.38099	1.76632	0.810796	2.16466	1.35591
A730017L22Rik	0.252905	0.367086	0.51498	0.447123	0.355501
A730018C14Rik	0	0	0	0	0
A730020E08Rik	0	0	0	0	0
A730020M07Rik	0	0	0	0	0
A730036I17Rik	0	0	0	0	0
A730043L09Rik	0	0	0	0	0
A730046J19Rik	0.034428	0.07125	0.034292	0.024771	0.046521
A730056A06Rik	0.176895	0.113161	0.054293	0.130402	0.133917
A730082K24Rik	0	0	0	0	0
A730085K08Rik	0	0	0	0	0
A730090H04Rik	0	0	0	0	0
A730090N16Rik	0	0	0	0.056205	0
A830009L08Rik	0	0	0	0	0
A830010M20Rik	2.56325	2.68919	2.83458	2.62824	2.17847
A830011K09Rik	0	0	0	0	0
A830018L16Rik	0	0	0	0	0
A830019L24Rik	0	0	0	0	0
A830052D11Rik	0	0	0.107131	0	0
A830080D01Rik	63.5593	64.7694	70.1263	56.4724	39.1141
A830082K12Rik	0	0	0	0	0
A830082N09Rik	0.069446	0.101648	0.125845	0.093818	0.112286
A930001A20Rik	0	0	0	0	0
A930001C03Rik	0	0	0	0	0
A930002C04Rik	0	0	0	0	0
A930003A15Rik	0	0	0	0	0
A930003O13Rik	0	0	0	0	0
A930004D18Rik	0.075848	0.194946	0.112612	0.119309	0.10905
A930005H10Rik	0.533837	0.431125	0.911382	0.880157	0.223915
A930006I01Rik	0	0	0	0	0
A930006K02Rik	0	0	0.207469	0	0
A930007I19Rik	0	0	0	0	0
A930009A15Rik	0	0	0	0	0
A930011G23Rik	0	0	0	0	0
A930012L18Rik	0	0	0	0	0
A930013F10Rik	2.91981	2.4342	1.37018	1.5668	1.35301
A930015D03Rik	0.405003	0.473695	0.333614	1.44546	1.05924
A930016O22Rik	0	0	0	0	0
A930017M01Rik	0	0	0	0	0
A930018P22Rik	0	0	0	0	0
A930019D19Rik	0	0	0	0	0
A930024E05Rik	0	0	0.062918	0	0
A930031H19Rik	0	0	0	0	0
A930041C12Rik	0	1.20731	2.31258	1.63402	3.66378
AA387883	0	0	0	0	0
AA388235	0.010543	0	0.045219	0.020101	0.034033
AA413626	0.50328	0.498277	0.490641	0.689551	0.54885
AA414768	3.90644	3.93197	2.35673	2.36739	0.807416
AA415398	0.996762	1.13089	1.82132	1.07739	0.716013
AA465934	0	0	0	0	0.669529
AA467197	2.04925	1.4285	2.32711	1.43226	2.18479
AA474331	0.858036	0.583878	1.80549	0.480005	0.907579
AA536875	0	0	0	0	0
AA543186	0.260461	0.074388	0.16655	0.182183	0.361254
AA543401	0	0	0	0	0.035249
AA545190	0	0	0	0	0
AA619741	0	0.007858	0.00754	0	0
AA792892	0	0	0	0	0
AA986860	0.265575	0.202389	0.360317	0.240155	0.182484
Aaas	77.7526	81.177	88.4791	92.7358	98.5849
Aacs	1.08666	1.55802	3.59736	3.1824	6.25033
Aadac	0	0	0	0	0
Aadacl2	0	0	0	0	0
Aadacl3	0	0	0	0	0
Aadat	0	0	0	0	0
Aaed1	13.5374	9.78156	10.6992	13.8579	10.4821
Aagab	24.575	23.4533	40.1216	44.5131	46.7775
Aak1	5.37899	5.3911	6.55581	5.25756	5.17701
Aamdc	41.5731	53.2963	37.2957	40.0084	47.3376
Aamp	104.377	108.81	96.5449	107.456	105.107
Aanat	0.112078	0	0	0.080135	0
Aar2	17.2811	16.625	13.8579	14.8033	17.7462
Aard	117.461	126.748	91.5144	107.979	98.8004
Aars	54.7708	54.8324	51.3083	45.966	59.1702
Aars2	2.58921	2.69697	5.18045	3.53614	4.5029
Aarsd1	24.3736	22.5843	24.9078	26.8175	30.8758
Aasdh	3.12914	2.94866	4.24692	4.10914	3.07131
Aasdhppt	17.9442	20.277	22.2814	16.1681	15.8945
Aass	0.261892	0.079539	0.216701	0.188237	0.29613
Aatf	35.6323	35.4599	30.0178	33.5193	31.3678
Aatk	0.056951	0.021984	0.070906	0.080156	0.085117
AB124611	0	0	0	0	0.135386
Abat	6.86098	7.39265	4.50833	5.09727	2.89907
Abca1	6.42979	5.88815	11.6815	13.2271	7.45938
Abca12	0	0	0	0	0
Abca13	0	0	0	0	0
Abca14	0	0	0	0	0
Abca15	0	0	0	0	0
Abca16	0.087961	0	0.169264	0.08083	0
Abca17	0.391709	0.205175	0.295171	0.395892	0.034015
Abca2	102.588	107.4	99.6521	126.546	90.921
Abca3	17.4439	20.268	25.0369	24.4193	19.8328
Abca4	0.01125	0	0	0	0
Abca5	14.508	14.8323	11.1812	6.78873	8.82318
Abca6	0.099099	0	0	0.019736	0
Abca7	2.76959	2.8579	5.15613	4.79122	4.69498
Abca8a	0	0.014976	0	0.013841	0.015754
Abca8b	0	0	0	0	0.021482
Abca9	0	0	0	0	0
Abcb10	2.35446	2.39395	7.26388	6.72068	6.82547
Abcb11	0	0	0	0	0
Abcb1a	0	0	0.020269	0	0
Abcb1b	0	0	0	0	0
Abcb4	0	0	0.012426	0	0
Abcb5	0	0	0	0	0
Abcb6	56.7771	52.6286	40.5005	55.8064	43.4938
Abcb7	10.9875	11.4093	18.1075	11.999	15.0093
Abcb8	8.75158	8.48129	10.8322	11.5289	13.8984
Abcb9	6.10939	5.14492	5.87235	7.16264	5.48699
Abcc1	14.0861	12.7208	23.3633	27.3201	24.3376
Abcc10	9.47062	8.67888	11.1579	12.6508	12.4388
Abcc12	0	0	0	0	0
Abcc2	0	0.023411	0	0	0
Abcc3	0	0	0	0	0.035375
Abcc4	6.75856	5.72392	12.9177	15.1924	14.1203
Abcc5	11.9813	13.8021	18.4608	25.1606	12.1253
Abcc6	0	0	0	0.023321	0
Abcc8	0	0.041612	0.10168	0.069262	0
Abcc9	0	0.011158	0	0.010312	0.034037
Abcd1	9.77009	9.3846	7.17011	7.59909	5.84427
Abcd2	0.373765	0.372966	0.24838	0.339899	0.26898
Abcd3	31.1292	31.0199	52.4016	43.8406	48.1539
Abcd4	0	0.131495	0.047906	0.107661	0.052517
Abce1	78.2005	75.2062	108.853	71.879	98.2138
Abcf1	47.6992	49.818	61.2575	69.355	66.0745
Abcf2	104.293	108.99	79.7982	88.9965	95.1818
Abcf3	28.6146	28.398	35.1667	34.7041	43.774
Abcg1	0.826164	0.722042	1.52546	1.77139	1.935
Abcg2	14.249	13.6792	10.2619	9.84942	11.9646
Abcg3	0	0	0	0	0
Abcg4	0.123395	0.160525	0.410371	0.234201	0.278221
Abcg5	0	0	0	0	0
Abcg8	0	0	0	0	0
Abhd1	0.271218	0.283796	0.128904	0.02792	0
Abhd10	9.1152	9.92774	12.8506	12.1259	11.1315
Abhd11	5.94513	8.68407	16.5515	16.808	12.4121
Abhd11os	0	0	0	0	0
Abhd12	57.2105	59.7997	25.5426	34.6653	31.1593
Abhd12b	0	0	0	0	0
Abhd13	7.88968	6.90555	7.93264	7.0112	7.62232
Abhd14a	4.32997	6.18122	8.4007	9.02792	11.1866
Abhd14b	0.328948	0.339993	0.878095	0.831308	0.919561
Abhd15	0.167072	0.141825	0.124201	0.248218	0.177003
Abhd16a	30.4899	31.1541	20.5875	21.3727	24.2288
Abhd16b	0.045935	0.071077	0	0.021896	0.024922
Abhd17a	39.0598	39.2533	56.5856	68.2024	73.5959
Abhd17b	10.0201	10.3448	9.26353	8.00149	9.6683
Abhd17c	22.0869	20.8398	37.1387	31.5219	36.5802
Abhd2	1.60922	1.43613	6.07646	5.26806	5.91649
Abhd3	1.58957	2.06185	1.47427	1.40044	1.43796
Abhd4	36.4269	38.2038	24.9905	41.6935	33.8759
Abhd5	16.8725	15.178	25.4221	22.9641	25.9488
Abhd6	2.48387	1.93396	0.973824	1.87074	1.83149
Abhd8	5.70629	5.85269	6.31361	6.44633	5.92369
Abi1	34.4852	35.4627	61.5825	40.845	53.1418
Abi2	26.7528	11.0525	26.4055	22.3781	20.7735
Abi3	1.89363	1.54785	4.71981	5.66199	6.38058
Abi3bp	0	0.035836	0.085966	0.0414	0.084583
Abl1	13.87	15.6802	10.3878	11.9122	11.6939
Abl2	19.4359	18.4547	14.5795	21.614	20.4562
Ablim1	0.02463	0.050812	0.121893	0.081447	0.086858
Ablim2	0.108868	0.101578	0.407751	0.568746	0.308094
Ablim3	0.035715	0.09994	0.077653	0.144439	0.13318
Abo	0.386105	0.537091	0.246725	0.235468	0.245215
Abr	21.5319	21.9268	19.9827	22.4799	23.3192
Abra	0	0	0	0	0
Abracl	4.15483	3.51939	3.01898	3.32337	2.33065
Abt1	9.96628	8.70124	9.66444	10.6724	11.3107
Abtb1	13.4	12.5511	12.7771	17.1475	10.685
Abtb2	15.5002	16.3354	10.0871	12.427	10.3683
Acaa1a	7.46474	9.88879	16.2378	15.9328	16.6211
Acaa1b	4.62447	3.90946	9.42642	9.48839	9.60147
Acaa2	3.18144	7.00304	5.44393	5.69869	9.04298
Acaca	24.2022	25.5007	11.4641	10.9338	9.17958
Acacb	0.157955	0.196886	0.174818	0.267426	0.135293
Acad10	0.648195	0.903637	1.18778	1.62584	2.01298
Acad11	15.1349	14.6306	28.5686	26.3116	31.1162
Acad12	3.09188	2.2645	6.46476	7.00193	6.36654
Acad8	4.45961	3.77794	3.56078	4.63342	5.41933
Acad9	12.8925	13.5064	15.6798	15.6605	18.2494
Acadl	13.3948	13.3774	22.6303	17.0451	26.6395
Acadm	21.9384	19.6774	44.1556	40.8844	43.8847
Acads	8.73374	6.75165	11.0216	13.095	12.2832
Acadsb	16.4335	17.6815	12.88	11.2242	11.4976
Acadvl	61.8823	59.79	52.0359	50.2939	63.8401
Acan	0.132891	0.131078	0.076673	0.068631	0.210511
Acap1	0.340844	0.367945	0.306562	0.250935	0.174119
Acap2	3.81549	4.42747	7.21662	5.62931	7.19212
Acap3	6.08661	5.52547	6.04323	9.18693	6.82497
Acat1	10.9336	11.165	26.4166	23.944	28.1164
Acat2	78.1584	73.2132	18.7129	17.3708	19.6764
Acat3	0.47129	6.98277	3.13126	4.31337	1.22539
Acbd3	53.1186	53.0916	51.9274	46.9074	46.6904
Acbd4	2.5073	2.79019	2.46241	2.45815	2.59175
Acbd5	8.84898	8.43733	13.718	10.3605	11.4324
Acbd6	69.9354	60.2902	50.4882	62.8247	88.4783
Acbd7	0	0	0.377128	0.217938	0
Accs	0.959257	0.584113	0.509067	0.725517	0.871192
Accsl	0	0	0	0.052404	0.09941
Acd	24.6161	26.4641	30.2255	30.3238	42.5035
Ace	2.04199	2.90716	6.15665	4.61618	5.99778
Ace2	0	0	0	0	0
Ace3	0	0	0	0	0
Acer1	0	0	0	0	0
Acer2	5.73503	5.33047	5.93948	6.11466	5.79835
Acer3	38.4993	43.6548	12.8791	10.9996	11.6689
Ache	0.01843	0.073033	0.017786	0.087852	0
Acin1	54.7915	52.6861	63.2585	64.9273	73.13
Ackr1	0	0.108039	0.243928	0.431281	0.26168
Ackr2	0.02707	0.041886	0.040192	0.064518	0.044061
Ackr3	2.39762	2.64217	1.75097	1.23812	0.682444
Ackr4	0.1155	0.13958	0.171246	0.184284	0.250657
Acly	48.9763	49.9742	82.1815	81.8468	82.8929
Acmsd	0	0	0	0	0
Acnat1	0	0	0	0	0
Acnat2	0	0	0	0	0
Aco1	4.58273	4.39237	7.77243	8.57882	9.11662
Aco2	111.023	108.385	97.8955	104.413	111.075
Acot1	2.68211	2.75598	2.20626	2.43835	2.4561
Acot10	6.13876	6.03922	6.84119	7.04045	8.95323
Acot11	0.071927	0.101833	0.322864	0.239139	0.311994
Acot12	0	0	0	0	0
Acot13	5.59493	5.59732	7.16924	2.42627	9.77016
Acot2	1.78113	1.30652	3.28466	2.70738	3.5926
Acot3	0	0	0.055764	0	0.090455
Acot4	0	0	0.1024	0	0
Acot5	0.156327	0.33244	0.112977	0.192024	0.1108
Acot6	0.328919	0.310122	0.149887	0.41045	0.332273
Acot7	92.8725	90.6988	61.2262	61.9577	72.6368
Acot8	8.63179	10.0027	8.20233	8.24673	8.37223
Acot9	20.9608	27.6099	33.0745	31.7257	38.0001
Acox1	10.0461	10.4113	15.3333	12.6065	15.3872
Acox2	0	0	0	0	0
Acox3	0.706912	0.932709	0.456013	0.561193	0.691964
Acoxl	0.15532	0.13082	0.140339	0.106299	0.060147
Acp1	14.0725	13.7088	17.0381	13.8174	15.7733
Acp2	10.8003	10.8059	11.0644	10.6566	11.3948
Acp5	17.3819	19.8706	21.1478	21.7275	19.6807
Acp6	8.25467	10.7071	10.3675	14.8787	12.1672
Acpp	0.443517	0.24066	0.687156	0.406117	0.743448
Acpt	0	0	0	0	0
Acr	0	0	0	0	0
Acrbp	1.7558	4.16527	3.37778	3.99997	2.5505
Acrv1	0	0	0	0	0
Acsbg1	18.0053	21.231	14.3551	18.13	15.6685
Acsbg2	0	0	0	0.149025	0
Acsf2	3.99561	3.92226	5.22754	5.23806	4.22553
Acsf3	6.11957	6.61692	3.6934	4.00609	3.93701
Acsl1	56.1166	50.8024	43.829	49.7079	49.2705
Acsl3	20.7054	20.8749	24.789	15.821	21.9627
Acsl4	10.1547	9.5603	17.4476	10.8817	11.6055
Acsl5	0.038814	0.026692	0	0	0
Acsl6	1.52321	2.20422	0.912856	2.68648	0.992968
Acsm1	0	0	0	0	0
Acsm2	0	0	0	0	0
Acsm3	0	0	0	0	0
Acsm4	0	0	0	0	0
Acsm5	0	0	0	0	0
Acss1	2.77259	2.8109	1.59317	2.40122	1.4198
Acss2	99.5336	105.92	60.8077	66.3522	65.1059
Acss2os	0	0	0	0	0
Acss3	0	0	0	0	0
Acta1	0	0	0	0.123697	2.62101
Acta2	1.44202	5.51465	6.44626	5.89075	13.3053
Actb	140.986	123.782	302.185	249.134	342.915
Actbl2	0	0	0	0	0
Actc1	0	0	0	0	0
Actg1	125.766	107.567	209.751	161.08	218.938
Actg2	0	0	0	0	0
Actl10	0.162963	0.139384	0.080652	0.077032	0.117888
Actl11	0	0	0	0	0
Actl6a	29.3762	35.756	33.7656	29.666	32.2579
Actl6b	0	0	0	0	0
Actl7a	0.027107	0.027961	0	0	0
Actl7b	0.02869	0.059188	0	0	0.093394
Actl9	0	0	0	0	0
Actn1	0.320153	0.245753	0.436552	0.488596	0.825772
Actn2	2.67759	1.23899	2.85526	3.65378	1.52208
Actn3	3.87589	5.64783	2.27236	5.54705	1.8441
Actn4	75.0174	75.6775	39.0749	45.209	48.5555
Actr10	29.2965	16.3223	18.871	13.809	20.2205
Actr1a	44.4637	41.4441	38.6439	37.8087	46.9827
Actr1b	10.1732	12.5299	22.0739	20.358	26.727
Actr2	17.6098	17.2331	20.2893	14.1246	19.5816
Actr3	19.7488	33.6242	58.5012	35.6218	54.9688
Actr3b	25.7823	25.1702	27.4823	30.4566	28.9596
Actr5	3.44452	3.99792	7.55918	8.652	11.5314
Actr6	14.2461	18.3089	23.6089	11.1143	21.2351
Actr8	35.3354	32.4625	33.606	32.2669	34.4832
Actrt1	0	0	0	0	0
Actrt2	0	0	0	0	0
Actrt3	0	0	0	0	0
Acvr1	0.563963	0.582731	0.991428	1.10171	1.57187
Acvr1b	6.84016	6.69979	10.6608	9.88581	9.79641
Acvr1c	0	0	0	0	0
Acvr2a	10.118	8.95397	10.0036	6.44795	8.49043
Acvr2b	15.1935	11.4317	16.1703	17.8503	17.9294
Acvrl1	0.487341	0.287016	0.472048	0.443511	0.696661
Acy1	9.70181	10.408	18.5926	22.5092	13.1108
Acy3	0	0.096618	0.12571	0	0.102497
Acyp1	8.5374	8.5324	16.1504	12.7153	17.8878
Acyp2	1.3321	1.24876	1.20276	1.0397	2.09382
Ada	0	0	0	0	0
Adad1	35.8549	26.8679	16.5846	20.9584	15.7352
Adad2	22.8162	25.9194	25.9775	34.9887	27.5873
Adal	12.0742	15.5008	10.5927	11.7179	6.70986
Adam10	48.4698	45.9002	56.4051	30.3305	43.0519
Adam11	4.60756	4.69893	3.37687	3.82549	3.08767
Adam12	0.027954	0.026347	0.0209	0.030257	0.034439
Adam15	60.7815	61.2921	67.8371	95.4853	71.105
Adam17	10.6299	26.7543	20.4458	19.0659	36.3467
Adam18	0	0	0	0	0
Adam19	0.038191	0.032829	0.043628	0.03034	0.123975
Adam1a	0.10515	0.074804	0.091355	0.125069	0.191535
Adam1b	0.070326	0.021872	0.076956	0.026952	0.129805
Adam2	0	0	0	0	0
Adam20	0	0	0	0	0
Adam21	0.042015	0	0.027724	0	0.04559
Adam22	4.00659	3.62571	5.95664	8.57476	6.92026
Adam23	0.0245	0	0.02425	0.040874	0.046357
Adam24	0	0	0	0	0
Adam25	0	0	0	0	0
Adam26a	0	0	0	0	0
Adam26b	0	0	0	0	0
Adam28	0	0	0	0	0
Adam29	0	0	0	0	0
Adam3	0	0	0	0	0
Adam30	0	0.052968	0.033314	0.049363	0.074915
Adam32	0	0	0	0	0
Adam33	0	0	0	0	0
Adam34	0	0	0	0	0
Adam39	0	0	0	0	0
Adam4	0	0.023614	0	0	0.028241
Adam5	0	0	0	0	0
Adam6a	0	0	0	0	0
Adam6b	0	0	0	0	0
Adam7	0	0	0	0	0
[truncated: 22,422 more rows]

## Sheet: Quick_Calc
	TPM_Stra8_WT_1	TPM_Stra8_WT_2	TPM_Stra8_KO_1	TPM_Stra8_KO_2	TPM_Stra8_KO_3
Rec8	79.9755	86.8315	166.302	163.694	119.26
Dazl	584.227	589.079	458.956	359.594	351.366
	WT	Stra8-KO
Rec8	83.4035	149.752
Dazl	586.653	389.972
	WT	Stra8-KO
Rec8	3.42798	15.2645
Dazl	2.42611	34.5738

## Sheet: DESeq_WT_Stra8KO
	baseMean	log2FoldChange	lfcSE	stat	pvalue	padj
0610005C13Rik	0.97713	-0.220022	3.3771	-0.0651513	0.948054	NA
0610007P14Rik	923.62	0.147752	0.176463	0.837294	0.402427	0.573941
0610009B22Rik	428.883	-0.0593716	0.195334	-0.30395	0.761166	0.857664
0610009L18Rik	10.335	-1.17446	1.10591	-1.06199	0.28824	0.459849
0610009O20Rik	1085.05	0.184898	0.157244	1.17586	0.23965	0.402794
0610010B08Rik	1.39308	0.00827679	2.35864	0.00350914	0.9972	NA
0610010F05Rik	838.117	0.885505	0.168869	5.24373	1.57367e-07	1.76854e-06
0610010K14Rik	1400.2	-0.284445	0.181684	-1.5656	0.117442	0.239302
0610011F06Rik	291.819	0.468707	0.205523	2.28056	0.0225744	0.0651393
0610012G03Rik	236.649	-0.544195	0.240068	-2.26684	0.0234	0.0670761
0610030E20Rik	448.859	-0.111783	0.210165	-0.531884	0.594806	0.738482
0610031O16Rik	0	NA	NA	NA	NA	NA
0610037L13Rik	386.838	1.06206	0.19291	5.50544	3.6824e-08	4.69192e-07
0610038B21Rik	1.14394	0.732143	2.54603	0.287562	0.773682	NA
0610039H22Rik	0	NA	NA	NA	NA	NA
0610039K10Rik	2.85334	2.00913	1.75061	1.14767	0.251103	NA
0610040B10Rik	27.5613	-0.348548	0.580602	-0.600322	0.548292	0.701165
0610040F04Rik	1.94766	-0.690492	2.36005	-0.292575	0.769847	NA
0610040J01Rik	0.697136	0.101165	3.946	0.0256374	0.979547	NA
0610043K17Rik	0.581248	1.63418	3.85346	0.424081	0.671507	NA
1010001N08Rik	2.25284	1.74448	1.97371	0.88386	0.376772	NA
1110001J03Rik	313.832	-0.378633	0.236106	-1.60366	0.108789	0.22604
1110002L01Rik	20.8487	-0.194263	0.638961	-0.304029	0.761105	0.857664
1110004E09Rik	1068.82	-0.0381349	0.14609	-0.261037	0.794064	0.879512
1110004F10Rik	2107.91	0.53699	0.129488	4.14704	3.36802e-05	0.000230389
1110006O24Rik	12.9883	0.32233	0.828937	0.388847	0.697389	0.813439
1110007C09Rik	925.795	-0.362099	0.175411	-2.06429	0.0389904	0.10088
1110008F13Rik	420.635	-0.185082	0.213924	-0.865175	0.386943	0.559579
1110008L16Rik	406.192	-0.511355	0.205803	-2.48468	0.0129667	0.0409543
1110008P14Rik	562.892	-1.09687	0.220223	-4.98072	6.33472e-07	6.30099e-06
1110012L19Rik	294.633	-1.13914	0.25585	-4.45236	8.49321e-06	6.64202e-05
1110015O18Rik	0	NA	NA	NA	NA	NA
1110017D15Rik	1.40062	0.727649	2.30133	0.316186	0.751862	NA
1110019D14Rik	40.291	0.965944	0.508805	1.89845	0.0576362	0.138097
1110020A21Rik	1.85633	-1.2696	2.62689	-0.483307	0.628877	NA
1110025L11Rik	0	NA	NA	NA	NA	NA
1110028F11Rik	0	NA	NA	NA	NA	NA
1110028F18Rik	0.160682	0	4.56204	0	1	NA
1110032A03Rik	1060.23	-0.113319	0.170649	-0.664049	0.506659	0.665758
1110032F04Rik	7.8101	0.339887	1.06829	0.31816	0.750364	0.849945
1110034G24Rik	84.4707	-0.307865	0.375621	-0.819617	0.412434	0.583367
1110036E04Rik	0	NA	NA	NA	NA	NA
1110037F02Rik	3209.73	0.182996	0.128098	1.42856	0.15313	0.291436
1110038B12Rik	154.893	-0.777877	0.257608	-3.01962	0.00253095	0.0102261
1110038F14Rik	647.221	-0.0473768	0.169117	-0.280143	0.779368	0.870446
1110046J04Rik	6.3424	0.630175	1.17534	0.536164	0.591846	0.735852
1110051M20Rik	570.285	-0.261761	0.19331	-1.3541	0.175704	0.323296
1110058D11Rik	0	NA	NA	NA	NA	NA
1110059E24Rik	660.594	-0.0585741	0.185919	-0.315051	0.752723	0.851394
1110059G10Rik	507.845	0.597169	0.197469	3.02411	0.00249365	0.0100955
1110065P20Rik	332.552	-0.56696	0.242527	-2.33772	0.019402	0.0575652
1190002F15Rik	0.126599	-0.808541	4.56204	-0.177232	0.859326	NA
1190002N15Rik	726.015	0.571942	0.241103	2.37218	0.0176832	0.0532335
1190003K10Rik	0	NA	NA	NA	NA	NA
1190005I06Rik	0.144955	1.59004	4.56093	0.348623	0.727373	NA
1190007I07Rik	102.008	-0.0148464	0.305623	-0.0485775	0.961256	0.979906
1200014J11Rik	3146.97	0.288265	0.130941	2.20149	0.0277013	0.0771502
1300002E11Rik	129.83	0.532285	0.288468	1.84521	0.0650069	0.151786
1300017J02Rik	65.1471	-0.333383	0.407166	-0.818789	0.412907	0.583978
1500004A13Rik	284.087	0.936578	0.215909	4.33783	1.43896e-05	0.000107216
1500009C09Rik	0.266031	-0.808523	4.56204	-0.177228	0.859329	NA
1500009L16Rik	80.4979	0.377158	0.535369	0.704483	0.481132	0.644689
1500011B03Rik	1399.73	-1.03877	0.1579	-6.57869	4.7462e-11	9.83468e-10
1500011K16Rik	152.831	-0.0424717	0.291892	-0.145505	0.884312	0.935663
1500012F01Rik	74.1871	-0.835332	0.383468	-2.17836	0.029379	0.080768
1500012K07Rik	0	NA	NA	NA	NA	NA
1500015A07Rik	55.0165	-0.136069	0.437768	-0.310824	0.755934	0.85383
1500015L24Rik	0	NA	NA	NA	NA	NA
1500015O10Rik	1.79363	-2.43392	2.41256	-1.00885	0.313045	NA
1500017E21Rik	0.139432	0	4.56204	0	1	NA
1500026H17Rik	1.34288	-1.27184	2.70031	-0.470998	0.637642	NA
1600002D24Rik	0	NA	NA	NA	NA	NA
1600002H07Rik	734.441	-1.13251	0.190711	-5.93839	2.87841e-09	4.39313e-08
1600002K03Rik	47.292	0.249109	0.461292	0.540025	0.58918	0.733323
1600010M07Rik	0	NA	NA	NA	NA	NA
1600012H06Rik	751.7	-0.542525	0.197856	-2.74202	0.00610629	0.0218374
1600014C10Rik	179.23	0.743135	0.264534	2.80922	0.00496617	0.0183138
1600014C23Rik	1.38507	-1.12754	2.87099	-0.392736	0.694515	NA
1600014K23Rik	0	NA	NA	NA	NA	NA
1600015I10Rik	0	NA	NA	NA	NA	NA
1600019K03Rik	0.144955	1.59004	4.56093	0.348623	0.727373	NA
1600020E01Rik	49.0589	0.704678	0.449151	1.56891	0.116669	0.238128
1600023N17Rik	12.6981	1.28157	0.913389	1.40309	0.160591	0.30199
1600025M17Rik	0	NA	NA	NA	NA	NA
1600027J07Rik	0	NA	NA	NA	NA	NA
1600029I14Rik	0.398153	-0.213897	4.52716	-0.0472476	0.962316	NA
1600029O15Rik	43.5662	-0.468519	0.501479	-0.934275	0.350162	0.52456
1700001C02Rik	0	NA	NA	NA	NA	NA
1700001C19Rik	7.2171	-1.73665	1.16361	-1.49247	0.135576	0.266866
1700001D01Rik	0	NA	NA	NA	NA	NA
1700001F09Rik	0	NA	NA	NA	NA	NA
1700001G01Rik	0	NA	NA	NA	NA	NA
1700001G11Rik	22.6973	-0.446002	0.645466	-0.690978	0.489579	0.650969
1700001G17Rik	8.83579	2.04544	1.07338	1.9056	0.0567018	0.13618
1700001J03Rik	0.714224	0.758347	3.26485	0.232276	0.816324	NA
1700001J11Rik	78.6873	0.456566	0.34629	1.31845	0.187353	0.338505
1700001K19Rik	1.80989	-0.26613	2.04983	-0.12983	0.896701	NA
1700001K23Rik	0.300114	0	4.56204	0	1	NA
1700001L05Rik	4762.04	1.74805	0.232236	7.52702	5.19097e-14	1.64099e-12
1700001L19Rik	1.2378	-2.09274	3.10809	-0.673322	0.500743	NA
1700001O22Rik	12.3782	0.745985	0.816185	0.91399	0.360722	0.534847
1700001P01Rik	0.540282	-2.30361	4.43277	-0.519677	0.603288	NA
1700003C15Rik	0	NA	NA	NA	NA	NA
1700003D09Rik	20.2094	-0.732747	0.763785	-0.959363	0.337376	0.51105
1700003E16Rik	54.5103	0.78985	0.400247	1.97341	0.0484493	0.120204
1700003E24Rik	0	NA	NA	NA	NA	NA
1700003F12Rik	26.0656	1.26076	0.603904	2.08768	0.0368263	0.0963603
1700003G13Rik	0	NA	NA	NA	NA	NA
1700003G18Rik	4.45679	-0.700898	1.33599	-0.52463	0.599841	NA
1700003H04Rik	0	NA	NA	NA	NA	NA
1700003I22Rik	0	NA	NA	NA	NA	NA
1700003L19Rik	0	NA	NA	NA	NA	NA
1700003M02Rik	1.24657	-1.9009	3.44139	-0.552364	0.580699	NA
1700003M07Rik	59.1083	-2.82312	0.523371	-5.39411	6.88642e-08	8.38301e-07
1700003P14Rik	0	NA	NA	NA	NA	NA
1700006A11Rik	0	NA	NA	NA	NA	NA
1700006E09Rik	0.265951	-1.71223	4.52329	-0.378537	0.705032	NA
1700006F04Rik	0	NA	NA	NA	NA	NA
1700006H21Rik	1.25275	-0.264677	2.50955	-0.105468	0.916004	NA
1700007B14Rik	1.18924	-2.23046	3.01234	-0.740443	0.459032	NA
1700007F19Rik	0	NA	NA	NA	NA	NA
1700007G11Rik	33.4941	-0.030184	0.525868	-0.0573984	0.954228	0.975592
1700007J10Rik	2.91041	0.586749	1.7148	0.342168	0.732224	NA
1700007K09Rik	0.548031	-0.874172	4.40854	-0.198291	0.842818	NA
1700007K13Rik	5.03151	0.151763	1.32396	0.114628	0.90874	0.949687
1700007L15Rik	91.4179	0.497247	0.335301	1.48299	0.138078	0.270888
1700007P06Rik	0	NA	NA	NA	NA	NA
1700008C04Rik	0	NA	NA	NA	NA	NA
1700008J07Rik	41.8816	1.60785	0.469005	3.42821	0.000607585	0.00298101
1700008K24Rik	0	NA	NA	NA	NA	NA
1700008O03Rik	7.37994	-0.0062169	1.07565	-0.00577966	0.995389	0.997215
1700008P02Rik	0	NA	NA	NA	NA	NA
1700009C05Rik	0.426943	1.63416	4.44654	0.367512	0.713237	NA
1700009J07Rik	0	NA	NA	NA	NA	NA
1700009N14Rik	0	NA	NA	NA	NA	NA
1700010B08Rik	1.93573	0.0611949	1.94612	0.0314446	0.974915	NA
1700010D01Rik	0.288444	1.61014	4.55936	0.35315	0.723976	NA
1700010I02Rik	0	NA	NA	NA	NA	NA
1700010I14Rik	35.1867	-0.733219	0.535895	-1.36821	0.171245	0.317525
1700010J16Rik	0	NA	NA	NA	NA	NA
1700010K23Rik	0	NA	NA	NA	NA	NA
1700011A15Rik	0.137126	-0.808541	4.56204	-0.177232	0.859326	NA
1700011B04Rik	0.270101	-1.73164	4.52176	-0.382958	0.701751	NA
1700011C11Rik	0	NA	NA	NA	NA	NA
1700011E24Rik	1.49749	0.189371	2.44305	0.0775141	0.938215	NA
1700011H14Rik	0.298025	2.61395	4.44509	0.588053	0.556497	NA
1700011I03Rik	0	NA	NA	NA	NA	NA
1700011L22Rik	0	NA	NA	NA	NA	NA
1700011M02Rik	223.231	0.72912	0.418135	1.74374	0.0812038	0.181199
1700012A03Rik	0	NA	NA	NA	NA	NA
1700012B07Rik	16.3768	-0.824477	0.778648	-1.05886	0.289665	0.461448
1700012B09Rik	0.431093	1.63416	4.44654	0.367512	0.713237	NA
1700012C14Rik	14.4711	-1.15085	0.876128	-1.31356	0.188993	0.340411
1700012D01Rik	4.41133	-1.99762	1.63385	-1.22264	0.221465	NA
1700012D14Rik	16.1307	0.0287766	0.740441	0.0388641	0.968999	0.984184
1700012D16Rik	0	NA	NA	NA	NA	NA
1700012H19Rik	0	NA	NA	NA	NA	NA
1700012I11Rik	0	NA	NA	NA	NA	NA
1700012L04Rik	0.876069	2.22485	3.04619	0.730373	0.465162	NA
1700012P22Rik	0	NA	NA	NA	NA	NA
1700013D24Rik	0	NA	NA	NA	NA	NA
1700013F07Rik	6.24268	0.0636562	1.15307	0.055206	0.955974	0.976827
1700013G24Rik	0	NA	NA	NA	NA	NA
1700013H16Rik	6538.61	0.443386	0.129773	3.41663	0.000634014	0.00309038
1700015E13Rik	0	NA	NA	NA	NA	NA
1700015F17Rik	3.11902	1.15408	1.60604	0.718587	0.472395	NA
1700015G11Rik	0	NA	NA	NA	NA	NA
1700016C15Rik	0	NA	NA	NA	NA	NA
1700016D06Rik	0.281988	0.648342	4.55936	0.1422	0.886922	NA
1700016G22Rik	0.132976	-0.808541	4.56204	-0.177232	0.859326	NA
1700016H13Rik	0.424407	-1.70141	4.52415	-0.376072	0.706864	NA
1700016K19Rik	20.6503	0.326534	0.675655	0.483284	0.628894	0.763995
1700016L04Rik	9.3507	-0.0597724	0.920194	-0.0649564	0.948209	0.972814
1700016L21Rik	0	NA	NA	NA	NA	NA
1700016P04Rik	0	NA	NA	NA	NA	NA
1700017B05Rik	916.399	0.400054	0.186878	2.14072	0.0322967	0.0869702
1700017D01Rik	0	NA	NA	NA	NA	NA
1700017G19Rik	0	NA	NA	NA	NA	NA
1700017J07Rik	0	NA	NA	NA	NA	NA
1700017L05Rik	0	NA	NA	NA	NA	NA
1700017N19Rik	0	NA	NA	NA	NA	NA
1700018A04Rik	0	NA	NA	NA	NA	NA
1700018B08Rik	14.1946	0.307136	0.760539	0.403839	0.686331	0.805572
1700018B24Rik	1141.48	-0.400196	0.153932	-2.59982	0.00932738	0.0311439
1700018C11Rik	0.420566	1.63416	4.44654	0.367512	0.713237	NA
1700018F24Rik	0	NA	NA	NA	NA	NA
1700018G05Rik	149.714	1.24695	0.398879	3.12614	0.00177116	0.00754046
1700018L02Rik	1.19163	-2.04856	3.09099	-0.662752	0.507489	NA
1700019A02Rik	7.19115	-0.451148	1.06221	-0.424724	0.671038	0.795584
1700019B03Rik	1.23608	0.765431	2.61522	0.292683	0.769764	NA
1700019B21Rik	1221.03	0.924014	0.163631	5.64692	1.63343e-08	2.20809e-07
1700019C18Rik	1.24947	-3.54562	3.09844	-1.14432	0.252489	NA
1700019D03Rik	0.566065	-1.71215	4.41274	-0.388002	0.698015	NA
1700019E08Rik	1.09567	-0.860772	2.9979	-0.287125	0.774016	NA
1700019G17Rik	348.606	1.60002	0.190943	8.37955	5.3132e-17	2.38657e-15
1700019G24Rik	0.132976	-0.808541	4.56204	-0.177232	0.859326	NA
1700019L03Rik	15.2624	0.0108872	0.773017	0.0140841	0.988763	0.994264
1700019M22Rik	0	NA	NA	NA	NA	NA
1700019N19Rik	0.813588	-1.57854	3.7924	-0.416238	0.677236	NA
1700019O17Rik	0.149013	1.61011	4.55937	0.353143	0.723981	NA
1700020A23Rik	0.986861	1.14562	3.39462	0.337482	0.735754	NA
1700020D05Rik	22.11	-0.937739	0.734084	-1.27743	0.201451	0.357514
1700020D14Rik	0	NA	NA	NA	NA	NA
1700020G17Rik	0	NA	NA	NA	NA	NA
1700020I14Rik	1630.41	0.330921	0.171607	1.92837	0.0538095	0.130337
1700020L24Rik	9.93663	0.973588	0.966634	1.00719	0.313841	0.486476
1700020M21Rik	1.30317	-0.281061	2.70608	-0.103863	0.917278	NA
1700020N01Rik	134.72	0.0583043	0.304836	0.191264	0.848318	0.912683
1700020N15Rik	0	NA	NA	NA	NA	NA
1700020N18Rik	0.144955	1.59004	4.56093	0.348623	0.727373	NA
1700021F05Rik	225.16	0.189854	0.244675	0.775944	0.437782	0.605877
1700021F07Rik	0.578977	0	4.56204	0	1	NA
1700021K19Rik	1693.24	0.528979	0.127787	4.13952	3.4803e-05	0.000237041
1700021N21Rik	2.39922	1.24325	1.79636	0.692098	0.488876	NA
1700022A21Rik	0	NA	NA	NA	NA	NA
1700022A22Rik	0	NA	NA	NA	NA	NA
1700022E09Rik	0	NA	NA	NA	NA	NA
1700022H01Rik	1.2489	-1.84915	2.64341	-0.69953	0.484221	NA
1700022H16Rik	0	NA	NA	NA	NA	NA
1700022I11Rik	0.878131	2.96728	3.56858	0.831502	0.40569	NA
1700023C21Rik	0	NA	NA	NA	NA	NA
1700023F02Rik	0	NA	NA	NA	NA	NA
1700023F06Rik	7.19735	-0.485817	1.10971	-0.437786	0.661542	0.789135
1700024B18Rik	0	NA	NA	NA	NA	NA
1700024F13Rik	14.0707	-0.342082	0.790197	-0.432907	0.665083	0.791629
1700024G13Rik	0	NA	NA	NA	NA	NA
1700024I08Rik	0	NA	NA	NA	NA	NA
1700024N05Rik	0	NA	NA	NA	NA	NA
1700024P04Rik	0.126599	-0.808541	4.56204	-0.177232	0.859326	NA
1700024P16Rik	69.2688	-0.0590676	0.487372	-0.121196	0.903536	0.946505
1700025B11Rik	0	NA	NA	NA	NA	NA
1700025C18Rik	0	NA	NA	NA	NA	NA
1700025F22Rik	0	NA	NA	NA	NA	NA
1700025F24Rik	0.811744	-1.23872	3.19045	-0.388258	0.697825	NA
1700025G04Rik	155.764	0.100335	0.39735	0.25251	0.800647	0.883906
1700025J12Rik	0	NA	NA	NA	NA	NA
1700025K24Rik	0	NA	NA	NA	NA	NA
1700025M24Rik	0.426943	1.63416	4.44654	0.367512	0.713237	NA
1700025N23Rik	1.80677	-0.49311	2.17457	-0.226762	0.820609	NA
1700026D08Rik	4.56218	2.13364	1.45975	1.46164	0.143839	NA
1700026D11Rik	0	NA	NA	NA	NA	NA
1700026F02Rik	0	NA	NA	NA	NA	NA
1700026J14Rik	0.286138	0.648342	4.55936	0.1422	0.886922	NA
1700026L06Rik	6.4112	1.2976	1.25034	1.0378	0.299364	0.471396
1700027A15Rik	0	NA	NA	NA	NA	NA
1700027F06Rik	0	NA	NA	NA	NA	NA
1700027F09Rik	0	NA	NA	NA	NA	NA
1700027H10Rik	0	NA	NA	NA	NA	NA
1700027I24Rik	0.144955	1.59004	4.56093	0.348623	0.727373	NA
1700027J07Rik	0	NA	NA	NA	NA	NA
1700028B04Rik	0.420257	-1.68169	4.52574	-0.371584	0.710203	NA
1700028D13Rik	0	NA	NA	NA	NA	NA
1700028E10Rik	20.0214	-0.265801	0.66305	-0.400876	0.688511	0.807202
1700028I16Rik	31.1797	-0.0361463	0.539805	-0.0669617	0.946612	0.972036
1700028J19Rik	19.736	1.07529	0.712425	1.50933	0.131214	0.260353
1700028K03Rik	95.5641	2.23801	0.339023	6.60133	4.07483e-11	8.59407e-10
1700028M03Rik	0	NA	NA	NA	NA	NA
1700028P14Rik	0	NA	NA	NA	NA	NA
1700028P15Rik	0	NA	NA	NA	NA	NA
1700029B22Rik	0	NA	NA	NA	NA	NA
1700029F12Rik	0.149013	1.61011	4.55937	0.353143	0.723981	NA
1700029H14Rik	0.278863	0	4.56204	0	1	NA
1700029I15Rik	4.20501	-0.662135	1.4052	-0.471203	0.637496	NA
1700029J03Rik	0.144955	1.59004	4.56093	0.348623	0.727373	NA
1700029J07Rik	23.0354	-0.764025	0.605099	-1.26264	0.206717	0.364535
1700029M20Rik	1.12559	-0.243245	2.79641	-0.0869845	0.930684	NA
1700029N11Rik	0	NA	NA	NA	NA	NA
1700029P11Rik	156.204	-0.39569	0.270438	-1.46315	0.143427	0.278154
1700030A11Rik	0	NA	NA	NA	NA	NA
1700030C10Rik	187.351	1.06258	0.26971	3.9397	8.15823e-05	0.000509002
1700030F04Rik	0	NA	NA	NA	NA	NA
1700030F18Rik	0	NA	NA	NA	NA	NA
1700030J22Rik	234.896	0.346986	0.235897	1.47092	0.141312	0.275256
1700030K09Rik	161.379	1.81745	0.264601	6.86864	6.48169e-12	1.53335e-10
1700030L20Rik	0	NA	NA	NA	NA	NA
1700030M09Rik	0.582102	0.646916	3.97509	0.162742	0.870721	NA
1700030N03Rik	0	NA	NA	NA	NA	NA
1700030O20Rik	0	NA	NA	NA	NA	NA
1700031A10Rik	0	NA	NA	NA	NA	NA
1700031F05Rik	61.0452	4.52681	1.48249	3.05352	0.00226176	0.00926506
1700031M16Rik	0	NA	NA	NA	NA	NA
1700031P21Rik	0	NA	NA	NA	NA	NA
1700034E13Rik	0	NA	NA	NA	NA	NA
1700034G24Rik	0	NA	NA	NA	NA	NA
1700034H15Rik	20.711	1.32565	0.698157	1.89879	0.0575919	0.138014
1700034I23Rik	5.14915	1.98772	1.25449	1.58449	0.113083	0.232825
1700034J05Rik	0.144955	1.59004	4.56093	0.348623	0.727373	NA
1700034K08Rik	0	NA	NA	NA	NA	NA
1700034O15Rik	0.274251	-1.75087	4.52027	-0.387337	0.698507	NA
1700034P13Rik	4.90473	-0.234764	1.38514	-0.169488	0.865413	NA
1700036G14Rik	0	NA	NA	NA	NA	NA
1700037C18Rik	60.2689	1.15672	0.398181	2.90503	0.00367222	0.0140798
1700037H04Rik	1000.79	0.19319	0.159428	1.21177	0.225601	0.387533
1700039E15Rik	0.524752	-0.79636	4.48734	-0.177468	0.859141	NA
1700039E22Rik	0	NA	NA	NA	NA	NA
1700040L02Rik	35.5765	0.293812	0.575972	0.510116	0.60997	0.749939
1700041A01Rik	1.15263	1.3081	2.58389	0.50625	0.612681	NA
1700041C23Rik	0.293658	-0.808522	4.56204	-0.177228	0.859329	NA
1700041M19Rik	0	NA	NA	NA	NA	NA
1700042G07Rik	0.144955	1.59004	4.56093	0.348623	0.727373	NA
1700042G15Rik	0	NA	NA	NA	NA	NA
1700042O10Rik	0.562696	-0.29385	4.42691	-0.0663783	0.947077	NA
1700044C05Rik	0.149013	1.61011	4.55937	0.353143	0.723981	NA
1700044K03Rik	0	NA	NA	NA	NA	NA
1700045H11Rik	0.137126	-0.808541	4.56204	-0.177232	0.859326	NA
1700046C09Rik	0	NA	NA	NA	NA	NA
1700047A11Rik	0.160682	0	4.56204	0	1	NA
1700047E10Rik	2.26696	-2.27894	2.28809	-0.996003	0.319249	NA
1700047G03Rik	0.298025	2.61395	4.44509	0.588053	0.556497	NA
1700047I17Rik2	0	NA	NA	NA	NA	NA
1700047L14Rik	0.690668	0.152764	3.21904	0.0474565	0.962149	NA
1700047M11Rik	1.14741	0.138004	2.61384	0.0527973	0.957893	NA
1700048M11Rik	0	NA	NA	NA	NA	NA
1700048O20Rik	419.962	0.845311	0.18984	4.45275	8.47773e-06	6.63356e-05
1700049E15Rik	0	NA	NA	NA	NA	NA
1700049E22Rik	1.96204	-1.24969	2.03682	-0.613549	0.539513	NA
1700049G17Rik	168.053	-0.244789	0.259557	-0.943101	0.345629	0.519909
1700049L16Rik	1.01987	3.92901	3.40713	1.15317	0.248839	NA
1700051A21Rik	0	NA	NA	NA	NA	NA
1700052I22Rik	0	NA	NA	NA	NA	NA
1700052K11Rik	136.238	1.28198	0.296926	4.3175	1.57809e-05	0.0001163
1700054A03Rik	0	NA	NA	NA	NA	NA
1700054K19Rik	0	NA	NA	NA	NA	NA
1700054M17Rik	0	NA	NA	NA	NA	NA
1700055C04Rik	0	NA	NA	NA	NA	NA
1700056E22Rik	1.55613	2.22471	2.84667	0.781514	0.4345	NA
1700057G04Rik	0.439545	0	4.56204	0	1	NA
1700057H15Rik	0	NA	NA	NA	NA	NA
1700057H21Rik	0	NA	NA	NA	NA	NA
1700060C16Rik	0	NA	NA	NA	NA	NA
1700060C20Rik	0	NA	NA	NA	NA	NA
1700061F12Rik	0	NA	NA	NA	NA	NA
1700061G19Rik	5.02762	0.587005	1.27649	0.45986	0.645617	0.777867
1700061I17Rik	0	NA	NA	NA	NA	NA
1700061J23Rik	0	NA	NA	NA	NA	NA
1700063A18Rik	0	NA	NA	NA	NA	NA
1700063D05Rik	0.149013	1.61011	4.55937	0.353143	0.723981	NA
1700063O14Rik	0	NA	NA	NA	NA	NA
1700064J06Rik	0	NA	NA	NA	NA	NA
1700064M15Rik	0.413683	-1.75085	4.52027	-0.387333	0.69851	NA
1700065D16Rik	1.89826	-0.572744	2.07701	-0.275754	0.782737	NA
1700065I16Rik	0	NA	NA	NA	NA	NA
1700065J11Rik	0	NA	NA	NA	NA	NA
1700065J18Rik	0.454649	2.59595	4.44654	0.583814	0.559345	NA
1700065L07Rik	0.126599	-0.808541	4.56204	-0.177232	0.859326	NA
1700065O20Rik	0	NA	NA	NA	NA	NA
1700066B17Rik	0	NA	NA	NA	NA	NA
1700066B19Rik	1.42941	-0.0389529	2.79093	-0.013957	0.988864	NA
1700066J03Rik	0.278863	0	4.56204	0	1	NA
1700066M21Rik	695.772	-0.288746	0.205824	-1.40288	0.160652	0.302066
1700066N21Rik	0	NA	NA	NA	NA	NA
1700066O22Rik	0	NA	NA	NA	NA	NA
1700067G17Rik	0	NA	NA	NA	NA	NA
1700067K01Rik	181.746	0.393898	0.311604	1.2641	0.206194	0.36393
1700067P10Rik	0	NA	NA	NA	NA	NA
1700069L16Rik	0.137126	-0.808541	4.56204	-0.177232	0.859326	NA
1700069P05Rik	0	NA	NA	NA	NA	NA
1700071K01Rik	15.6913	-0.737785	0.789251	-0.934792	0.349896	0.524404
1700071M16Rik	0.265951	-1.71223	4.52329	-0.378537	0.705032	NA
1700072B07Rik	0	NA	NA	NA	NA	NA
1700072I22Rik	0	NA	NA	NA	NA	NA
1700072O05Rik	0	NA	NA	NA	NA	NA
1700073E17Rik	1.39531	0.00409959	2.17969	0.00188082	0.998499	NA
1700074H08Rik	0	NA	NA	NA	NA	NA
1700074P13Rik	0	NA	NA	NA	NA	NA
1700080E11Rik	0	NA	NA	NA	NA	NA
1700080N15Rik	0	NA	NA	NA	NA	NA
1700080O16Rik	372.653	-0.422074	0.239797	-1.76013	0.0783865	0.176494
1700081H04Rik	0	NA	NA	NA	NA	NA
1700084C01Rik	0.126599	-0.808541	4.56204	-0.177232	0.859326	NA
1700084D21Rik	0	NA	NA	NA	NA	NA
1700084E18Rik	8.49726	0.80734	0.997236	0.809577	0.418183	0.588275
1700084F23Rik	0	NA	NA	NA	NA	NA
1700084J12Rik	141.974	-0.572635	0.281886	-2.03144	0.0422107	0.107521
1700084M14Rik	0.137126	-0.808541	4.56204	-0.177232	0.859326	NA
1700085C21Rik	0	NA	NA	NA	NA	NA
1700086L19Rik	0	NA	NA	NA	NA	NA
1700086O06Rik	13.2407	0.0716753	0.812627	0.0882019	0.929716	0.962819
1700088E04Rik	4.77332	0.376921	1.31497	0.286639	0.774389	NA
1700091H14Rik	0	NA	NA	NA	NA	NA
1700092C02Rik	0	NA	NA	NA	NA	NA
1700092C10Rik	0	NA	NA	NA	NA	NA
1700092E19Rik	0	NA	NA	NA	NA	NA
1700092K14Rik	0.132976	-0.808541	4.56204	-0.177232	0.859326	NA
1700092M07Rik	5.74876	1.42029	1.25029	1.13597	0.25597	0.422962
1700093K21Rik	6.37739	0.171633	1.22635	0.139954	0.888696	0.93854
1700094D03Rik	43.1238	-0.0778312	0.452867	-0.171863	0.863545	0.922284
1700094J05Rik	0.842932	0.714889	3.1213	0.229036	0.818841	NA
1700094M24Rik	0	NA	NA	NA	NA	NA
1700095A21Rik	0.144955	1.59004	4.56093	0.348623	0.727373	NA
1700095B10Rik	0	NA	NA	NA	NA	NA
1700095J12Rik	0.144955	1.59004	4.56093	0.348623	0.727373	NA
1700096J18Rik	0.847601	1.73197	3.26069	0.531168	0.595303	NA
1700096K18Rik	9.10904	1.27061	1.02212	1.24311	0.213827	0.373601
1700096P03Rik	0	NA	NA	NA	NA	NA
1700097N02Rik	0	NA	NA	NA	NA	NA
1700099I09Rik	0	NA	NA	NA	NA	NA
1700100I10Rik	1.93789	-0.233177	2.0313	-0.114792	0.90861	NA
1700100L14Rik	0.144955	1.59004	4.56093	0.348623	0.727373	NA
1700101E01Rik	9.52635	-0.457476	0.960331	-0.476373	0.633809	0.768576
1700101I11Rik	3.91732	-0.486233	1.52793	-0.31823	0.75031	NA
1700101O22Rik	0	NA	NA	NA	NA	NA
1700102H20Rik	2.03484	1.1456	2.10965	0.543029	0.58711	NA
1700102P08Rik	6.91762	-1.10623	1.17112	-0.944597	0.344865	0.519089
1700104L18Rik	0	NA	NA	NA	NA	NA
1700105P06Rik	0.831032	-0.247337	3.56266	-0.0694248	0.944651	NA
1700106J16Rik	0.436294	0.648375	4.55936	0.142207	0.886916	NA
1700108F19Rik	0.42142	0.648372	4.55936	0.142207	0.886917	NA
1700108J01Rik	0	NA	NA	NA	NA	NA
1700109G14Rik	1.68845	-1.84986	2.44128	-0.757742	0.448605	NA
1700109G15Rik	0	NA	NA	NA	NA	NA
1700109H08Rik	1.79704	0.4574	2.2825	0.200394	0.841172	NA
1700109I08Rik	0	NA	NA	NA	NA	NA
1700109K24Rik	2.26936	0.530268	1.94572	0.272531	0.785214	NA
1700110C19Rik	0	NA	NA	NA	NA	NA
1700110I01Rik	0.149013	1.61011	4.55937	0.353143	0.723981	NA
1700110I07Rik	5.66949	-0.258272	1.23366	-0.209354	0.834172	0.903766
1700110K17Rik	0	NA	NA	NA	NA	NA
1700111N16Rik	0.424407	-1.70141	4.52415	-0.376072	0.706864	NA
1700112E06Rik	0.137126	-0.808541	4.56204	-0.177232	0.859326	NA
1700112H15Rik	8.40272	1.18337	0.993709	1.19086	0.233707	0.396703
1700112J05Rik	0	NA	NA	NA	NA	NA
1700112J16Rik	3.65638	0.89836	1.58611	0.566391	0.571128	NA
1700113A16Rik	471.255	-0.359691	0.220831	-1.62881	0.103354	0.217406
1700113B09Rik	0	NA	NA	NA	NA	NA
1700113H08Rik	1.13325	0.347828	3.00838	0.11562	0.907954	NA
1700116B05Rik	0	NA	NA	NA	NA	NA
1700119H24Rik	0	NA	NA	NA	NA	NA
1700120C14Rik	1.97057	-0.266109	2.03181	-0.130972	0.895798	NA
1700120E14Rik	0.433399	2.59595	4.44654	0.583814	0.559345	NA
1700120G07Rik	0	NA	NA	NA	NA	NA
1700120K04Rik	8.63498	-0.923959	1.0495	-0.880384	0.378651	0.551182
1700121L16Rik	0	NA	NA	NA	NA	NA
1700121N20Rik	0.265951	-1.71223	4.52329	-0.378537	0.705032	NA
1700122C19Rik	0	NA	NA	NA	NA	NA
1700122O11Rik	0	NA	NA	NA	NA	NA
1700123I01Rik	560.081	4.58496	0.256384	17.8832	1.59539e-71	3.77417e-68
1700123J17Rik	0.160682	0	4.56204	0	1	NA
1700123K08Rik	0.529756	-2.26877	4.46321	-0.508326	0.611225	NA
1700123L14Rik	0.132976	-0.808541	4.56204	-0.177232	0.859326	NA
1700123M08Rik	26.2458	0.46651	0.591746	0.788362	0.430485	0.599461
1700123O12Rik	0	NA	NA	NA	NA	NA
1700123O20Rik	553.395	0.0515484	0.175071	0.294444	0.768419	0.863437
1700123O21Rik	0	NA	NA	NA	NA	NA
1700124L16Rik	2.53536	-1.01553	1.82782	-0.555596	0.578487	NA
1700125G02Rik	0	NA	NA	NA	NA	NA
1700125G22Rik	0.144955	1.59004	4.56093	0.348623	0.727373	NA
1700125H03Rik	0	NA	NA	NA	NA	NA
1700125H20Rik	28.7872	-0.523848	0.591999	-0.884879	0.376222	0.548828
1700126H18Rik	0	NA	NA	NA	NA	NA
1700128A07Rik	0	NA	NA	NA	NA	NA
1700128F08Rik	0.284386	1.59006	4.56093	0.348626	0.72737	NA
1700129C05Rik	0	NA	NA	NA	NA	NA
1810006J02Rik	0	NA	NA	NA	NA	NA
1810007C17Rik	0	NA	NA	NA	NA	NA
1810007D17Rik	0.139432	0	4.56204	0	1	NA
1810008I18Rik	0	NA	NA	NA	NA	NA
1810009A15Rik	3.50497	-0.355084	1.7657	-0.201101	0.84062	NA
1810009J06Rik	0	NA	NA	NA	NA	NA
1810010D01Rik	0.274251	-1.75087	4.52027	-0.387337	0.698507	NA
1810010H24Rik	19.9864	-1.90906	0.794409	-2.40312	0.0162559	0.0495569
1810011H11Rik	0	NA	NA	NA	NA	NA
1810011O10Rik	1.07226	-3.29004	3.11067	-1.05766	0.290209	NA
1810012K16Rik	0.408587	-0.224819	4.52304	-0.0497052	0.960357	NA
1810013A23Rik	0	NA	NA	NA	NA	NA
1810013L24Rik	3837.65	-0.0428722	0.144595	-0.296499	0.766849	0.862367
1810014B01Rik	113.24	-0.0335269	0.304763	-0.11001	0.912402	0.951336
1810018F18Rik	0.139432	0	4.56204	0	1	NA
1810019D21Rik	2.87799	-2.17004	1.89485	-1.14523	0.252112	NA
1810020O05Rik	0.831943	-0.283858	3.32704	-0.0853185	0.932008	NA
1810021B22Rik	14.8446	0.508402	0.74193	0.685243	0.493191	0.654247
1810022K09Rik	438.358	0.23373	0.198651	1.17659	0.23936	0.40245
1810024B03Rik	0.727989	1.60886	4.02911	0.39931	0.689665	NA
1810026B05Rik	150.257	0.0619132	0.27171	0.227865	0.819751	0.895116
1810026J23Rik	3403.62	0.778723	0.125097	6.22493	4.81771e-10	8.4008e-09
1810030O07Rik	728.708	-0.469459	0.170173	-2.75871	0.005803	0.0209374
1810032O08Rik	99.3651	0.178336	0.306627	0.581607	0.560831	0.710923
1810034E14Rik	14.7766	1.11233	0.792508	1.40356	0.160451	0.301809
1810037I17Rik	584.393	0.140134	0.198638	0.705474	0.480516	0.64429
1810041H14Rik	2.9912	-0.856483	1.68801	-0.507391	0.61188	NA
1810041L15Rik	2.49036	-4.77088	2.406	-1.98291	0.0473776	NA
1810043G02Rik	602.358	0.220482	0.167763	1.31425	0.188762	0.340162
1810043H04Rik	469.47	-0.294447	0.185314	-1.58891	0.112082	0.231258
1810044D09Rik	59.0971	-0.00970574	0.468917	-0.0206982	0.983486	0.991911
1810046K07Rik	0.263725	-1.70143	4.52415	-0.376076	0.70686	NA
1810053B23Rik	0	NA	NA	NA	NA	NA
1810055G02Rik	891.483	0.0429937	0.170124	0.252719	0.800485	0.883865
1810058I24Rik	980.459	-0.132657	0.16538	-0.802134	0.422476	0.592142
1810062G17Rik	2.1606	0.726019	1.83778	0.395052	0.692805	NA
1810062O18Rik	39.1466	0.825184	0.481945	1.7122	0.0868603	0.190724
1810063I02Rik	5.93142	-1.09098	1.21777	-0.895884	0.370315	0.543731
1810064F22Rik	2.44435	1.91597	1.74991	1.0949	0.273562	NA
1810065E05Rik	0	NA	NA	NA	NA	NA
2010001A14Rik	13.2127	0.16461	0.811412	0.202868	0.839238	0.906763
2010001E11Rik	16.5976	-0.767808	0.730574	-1.05097	0.293275	0.465007
2010003K11Rik	2.0724	-2.41988	2.27969	-1.0615	0.288464	NA
2010005H15Rik	0.137126	-0.808541	4.56204	-0.177232	0.859326	NA
2010009K17Rik	0.39255	-2.27632	4.4861	-0.507417	0.611862	NA
2010010A06Rik	12.2559	1.02393	0.859987	1.19063	0.233798	0.396763
2010012O05Rik	114.829	0.26697	0.331185	0.806105	0.420182	0.590268
2010016I18Rik	0	NA	NA	NA	NA	NA
2010106C02Rik	0	NA	NA	NA	NA	NA
2010106E10Rik	0.582194	0.628547	3.97498	0.158126	0.874358	NA
2010107E04Rik	2549.72	-0.0217157	0.160954	-0.134918	0.892676	0.940657
2010107G12Rik	13.3892	1.53248	0.824416	1.85887	0.0630453	0.148304
2010107G23Rik	265.97	-1.66972	0.239801	-6.96294	3.33232e-12	8.21399e-11
2010109A12Rik	0.987564	-0.233237	3.11745	-0.0748167	0.940361	NA
2010109I03Rik	0.289909	2.57774	4.44803	0.579524	0.562236	NA
2010111I01Rik	108.919	0.465925	0.296931	1.56914	0.116616	0.238128
2010204K13Rik	39.2964	-0.152566	0.633051	-0.241001	0.809554	0.888626
2010300C02Rik	56.4199	-0.835439	0.517535	-1.61426	0.10647	0.222339
2010308F09Rik	0	NA	NA	NA	NA	NA
2010310C07Rik	0	NA	NA	NA	NA	NA
2010315B03Rik	24.7848	0.715578	0.603187	1.18633	0.235492	0.398733
2010320M18Rik	163.498	-0.703122	0.28862	-2.43615	0.0148444	0.0459412
2200002D01Rik	32.5185	-0.0056519	0.548785	-0.0102989	0.991783	0.995641
2200002J24Rik	7.89168	0.847427	1.14996	0.73692	0.461171	0.626543
2210010C04Rik	0.678781	-1.27973	3.65258	-0.350363	0.726067	NA
2210011C24Rik	249.011	0.295515	0.265051	1.11493	0.264879	0.433094
2210013O21Rik	343.95	-0.628555	0.203568	-3.08769	0.00201717	0.00840379
2210015D19Rik	162.02	0.0762805	0.25322	0.301243	0.76323	0.859511
2210016F16Rik	2327.96	-0.418323	0.139534	-2.99801	0.00271751	0.0108349
2210016L21Rik	433.879	-0.819571	0.234022	-3.50212	0.000461575	0.00234909
2210018M11Rik	1967.34	1.43161	0.127629	11.217	3.3656e-29	4.87463e-27
2210019I11Rik	0.132976	-0.808541	4.56204	-0.177232	0.859326	NA
2210039B01Rik	3.66414	-1.16646	1.54131	-0.756796	0.449172	NA
2210404E10Rik	0	NA	NA	NA	NA	NA
2210404O09Rik	94.0761	0.587069	0.336702	1.74359	0.081231	0.181231
2210406O10Rik	39.4974	0.09021	0.46363	0.194573	0.845727	0.911346
2210407C18Rik	0	NA	NA	NA	NA	NA
2210408F21Rik	41.6145	-2.96445	0.586901	-5.05102	4.39451e-07	4.5167e-06
2210408I21Rik	115.104	1.19203	0.30959	3.85036	0.000117944	0.000706966
2210409D07Rik	0	NA	NA	NA	NA	NA
2210409E12Rik	0.590023	2.57794	4.25671	0.605619	0.544768	NA
2210414B05Rik	0	NA	NA	NA	NA	NA
2210416O15Rik	1.13397	-3.04986	3.13119	-0.974027	0.330043	NA
2210417A02Rik	1.65853	-2.28514	2.45682	-0.930121	0.352308	NA
2210420H20Rik	0	NA	NA	NA	NA	NA
2300002M23Rik	0.309695	1.61014	4.55936	0.353151	0.723975	NA
2300003K06Rik	0	NA	NA	NA	NA	NA
2300005B03Rik	0.132976	-0.808541	4.56204	-0.177232	0.859326	NA
2300009A05Rik	45.8224	0.400379	0.471328	0.84947	0.39562	0.56742
2310001H17Rik	0.415989	-0.808511	4.56204	-0.177226	0.859331	NA
2310001K24Rik	0.591465	-1.73129	4.35181	-0.397832	0.690754	NA
2310002D06Rik	0	NA	NA	NA	NA	NA
2310002F09Rik	0	NA	NA	NA	NA	NA
2310002L09Rik	0	NA	NA	NA	NA	NA
2310003N18Rik	0	NA	NA	NA	NA	NA
2310005A03Rik	0.149013	1.61011	4.55937	0.353143	0.723981	NA
2310005E17Rik	0	NA	NA	NA	NA	NA
2310007B03Rik	0.543108	0.773802	4.41339	0.175331	0.86082	NA
2310008N11Rik	0	NA	NA	NA	NA	NA
2310009A05Rik	67.2703	-0.210533	0.374652	-0.561941	0.574156	0.721137
2310009B15Rik	85.1448	-0.165526	0.3605	-0.459156	0.646122	0.778065
2310010G23Rik	64.4327	-0.142212	0.397329	-0.357919	0.720404	0.828841
2310010J17Rik	98.3955	-0.206356	0.331981	-0.62159	0.534211	0.688871
2310011J03Rik	568.84	-0.812495	0.173087	-4.69414	2.67727e-06	2.32707e-05
2310015A10Rik	214.069	-0.502376	0.231664	-2.16856	0.0301163	0.0824121
2310015D24Rik	0	NA	NA	NA	NA	NA
2310016D03Rik	0	NA	NA	NA	NA	NA
2310020H05Rik	0	NA	NA	NA	NA	NA
2310022A10Rik	472.163	-0.28238	0.190842	-1.47965	0.138966	0.272142
2310022B05Rik	500.073	-0.160595	0.262387	-0.612053	0.540503	0.693922
2310030A07Rik	0.266031	-0.808523	4.56204	-0.177228	0.859329	NA
2310030G06Rik	13.0296	-1.4402	0.867322	-1.66052	0.0968102	0.207134
2310033P09Rik	395.385	0.581793	0.188575	3.0852	0.00203413	0.00845461
2310034C09Rik	0	NA	NA	NA	NA	NA
2310034G01Rik	1.21866	-0.208851	3.04786	-0.0685239	0.945369	NA
2310034O05Rik	0	NA	NA	NA	NA	NA
2310035C23Rik	5018.8	0.38052	0.120459	3.15892	0.00158357	0.0068549
2310036O22Rik	2286.91	-0.456378	0.134043	-3.40472	0.000662312	0.0032036
2310039H08Rik	138.29	-0.449996	0.288961	-1.55729	0.119401	0.242526
2310039L15Rik	8.39227	-0.073051	0.982606	-0.0743441	0.940737	0.968789
2310040G24Rik	3.19194	-0.755495	1.56635	-0.482329	0.629572	NA
2310043L19Rik	0.289909	2.57774	4.44803	0.579524	0.562236	NA
2310043O21Rik	0	NA	NA	NA	NA	NA
2310045N01Rik	397.596	-0.233878	0.209031	-1.11887	0.263195	0.431086
2310045n01rik-mef2b	0	NA	NA	NA	NA	NA
2310047M10Rik	565.962	-0.738816	0.18027	-4.09838	4.16059e-05	0.000278826
2310050C09Rik	0	NA	NA	NA	NA	NA
2310057J18Rik	0	NA	NA	NA	NA	NA
2310057M21Rik	894.747	0.102473	0.158937	0.644738	0.519097	0.676726
2310057N15Rik	0	NA	NA	NA	NA	NA
2310061I04Rik	1421.54	0.462549	0.155887	2.96721	0.00300519	0.0118422
2310061N02Rik	0	NA	NA	NA	NA	NA
2310065F04Rik	0	NA	NA	NA	NA	NA
2310067B10Rik	1581.19	0.566286	0.162595	3.4828	0.000496202	0.00249932
2310068J16Rik	10.5843	0.840906	0.903175	0.931056	0.351824	0.526234
2310069B03Rik	0	NA	NA	NA	NA	NA
2310069G16Rik	0	NA	NA	NA	NA	NA
2310075C17Rik	0	NA	NA	NA	NA	NA
2310079G19Rik	0	NA	NA	NA	NA	NA
2310081J21Rik	1.35754	-0.810737	2.85555	-0.283916	0.776475	NA
2400006E01Rik	18.49	-0.544664	0.740108	-0.735926	0.461776	0.627021
2410002F23Rik	3397.51	0.355002	0.120073	2.95655	0.00311099	0.0121991
2410003L11Rik	19.9208	-1.49763	0.766819	-1.95304	0.050815	0.124824
2410004B18Rik	448.232	-0.297748	0.196316	-1.51668	0.129348	0.25721
2410004I01Rik	0.849078	-1.72876	3.48701	-0.495771	0.620056	NA
2410004P03Rik	36.0585	-0.874705	0.49565	-1.76476	0.0776036	0.175009
2410006H16Rik	150.043	-0.556777	0.31306	-1.7785	0.0753221	0.170759
2410012E07Rik	0	NA	NA	NA	NA	NA
2410015M20Rik	845.049	-0.228093	0.172814	-1.31987	0.186877	0.337773
2410016O06Rik	1095.56	-0.787645	0.17007	-4.6313	3.63371e-06	3.08843e-05
2410017I17Rik	0.132976	-0.808541	4.56204	-0.177232	0.859326	NA
2410018L13Rik	159.687	0.214984	0.257158	0.835999	0.403155	0.574595
2410021H03Rik	0.271554	0.628264	4.56093	0.137749	0.890439	NA
2410089E03Rik	2673.72	0.782289	0.19314	4.05037	5.11362e-05	0.000335101
2410124H12Rik	0.137126	-0.808541	4.56204	-0.177232	0.859326	NA
2410127L17Rik	1229.45	0.424557	0.158424	2.67988	0.00736494	0.0256598
2410131K14Rik	303.233	-0.175605	0.198337	-0.885388	0.375947	0.548658
2410137M14Rik	0	NA	NA	NA	NA	NA
2410141K09Rik	12.4439	-0.459936	0.818383	-0.562006	0.574112	0.721137
2500002B13Rik	0.689769	-0.275041	4.14328	-0.0663823	0.947073	NA
2500004C02Rik	63.1404	0.796981	0.377811	2.10947	0.0349043	0.0925003
2510002D24Rik	43.1757	-0.682534	0.494768	-1.3795	0.16774	0.312495
2510003B16Rik	1.84482	-0.253237	2.14755	-0.117919	0.906132	NA
2510009E07Rik	20.0308	-0.407741	0.780285	-0.522554	0.601285	0.743047
2510039O18Rik	2349.31	-0.343115	0.130179	-2.63573	0.00839572	0.028564
2610001J05Rik	211.662	-0.892982	0.26592	-3.35808	0.000784846	0.00371709
2610002M06Rik	1603.96	-0.214393	0.173378	-1.23656	0.216251	0.37676
2610005L07Rik	1946.61	0.0216604	0.140075	0.154634	0.87711	0.930958
2610008E11Rik	328.881	0.193156	0.252528	0.76489	0.444337	0.611604
2610015P09Rik	796.047	0.143665	0.202497	0.709466	0.478035	0.642115
2610016A17Rik	0.284386	1.59006	4.56093	0.348626	0.72737	NA
2610020C07Rik	128.43	-0.260856	0.317983	-0.820346	0.412019	0.582997
2610020H08Rik	771.503	0.809284	0.18286	4.4257	9.61286e-06	7.44787e-05
2610027K06Rik	8.25898	0.0053072	0.986864	0.00537784	0.995709	0.997396
2610028E06Rik	0.768402	3.19942	4.31008	0.742312	0.457898	NA
2610028H24Rik	1.5837	0.329097	2.15508	0.152707	0.878629	NA
2610035D17Rik	113.677	-0.858178	0.31551	-2.71997	0.00652871	0.0231191
2610035F20Rik	0	NA	NA	NA	NA	NA
2610037D02Rik	1.24988	-0.827699	2.90352	-0.285068	0.775592	NA
2610042L04Rik	15.2691	0.295295	0.82168	0.35938	0.719311	0.828164
2610044O15Rik8	32.8438	-0.0324076	0.520743	-0.0622334	0.950377	0.97412
2610100L16Rik	0	NA	NA	NA	NA	NA
2610203C22Rik	3.07843	-1.25641	2.02947	-0.619083	0.535862	NA
2610206C17Rik	10.0291	0.130958	0.908587	0.144133	0.885395	0.936379
2610301B20Rik	989.597	-0.0309654	0.177457	-0.174495	0.861477	0.921205
2610305D13Rik	49.225	-0.0390372	0.460882	-0.084701	0.932499	0.964013
2610306M01Rik	79.7222	1.61602	0.353176	4.57568	4.74684e-06	3.91497e-05
2610307P16Rik	8.57178	-0.505993	0.965239	-0.524215	0.600129	0.742394
2610316D01Rik	0.70319	-2.30995	3.67446	-0.62865	0.529578	NA
2610318N02Rik	234.172	0.258818	0.246843	1.04851	0.294403	0.466067
2610507B11Rik	13379.1	-0.125679	0.133111	-0.944165	0.345085	0.519201
2610507I01Rik	159.437	0.294089	0.262247	1.12142	0.26211	0.429705
2610524H06Rik	531.287	-0.151892	0.186734	-0.813411	0.415982	0.586283
2610528A11Rik	2.54452	-4.28482	2.46782	-1.73627	0.0825155	NA
2610528J11Rik	0	NA	NA	NA	NA	NA
2700029M09Rik	952.268	0.621857	0.150555	4.13044	3.62073e-05	0.000245898
2700038G22Rik	26.1917	0.274328	0.570699	0.480687	0.630739	0.765516
2700046A07Rik	14.4465	-0.0978962	0.867659	-0.112828	0.910167	0.950431
2700046G09Rik	34.5972	-0.299629	0.524847	-0.570887	0.568076	0.716289
2700049A03Rik	795.76	0.0137624	0.209984	0.0655405	0.947744	0.972547
2700054A10Rik	63.0453	0.348347	0.422005	0.825456	0.409113	0.580463
2700060E02Rik	4703.94	0.237252	0.111549	2.12689	0.0334292	0.0893755
2700062C07Rik	312.528	-0.261977	0.199063	-1.31605	0.188158	0.339612
2700069I18Rik	0.160682	0	4.56204	0	1	NA
2700070H01Rik	3.72064	-0.261636	1.47428	-0.177467	0.859141	NA
2700081O15Rik	1194.22	-0.271403	0.154471	-1.75698	0.0789218	0.177558
2700089I24Rik	0	NA	NA	NA	NA	NA
2700094K13Rik	1279	-0.0868087	0.163638	-0.530492	0.595771	0.739128
2700097O09Rik	208.004	0.110848	0.258119	0.429443	0.667601	0.793363
2700099C18Rik	461.459	0.397112	0.185839	2.13686	0.0326095	0.0876296
2810001G20Rik	63.9781	0.869079	0.39247	2.21438	0.0268024	0.0751249
2810002D19Rik	147.891	-0.402616	0.280351	-1.43612	0.150969	0.288698
2810004N23Rik	1923.92	-0.666206	0.153984	-4.32647	1.51521e-05	0.000112074
2810006K23Rik	147.691	0.0035967	0.260728	0.0137948	0.988994	0.994264
2810013P06Rik	202.419	0.631056	0.242508	2.60221	0.00926252	0.0309711
2810021J22Rik	1003.8	0.122955	0.1711	0.718619	0.472375	0.636561
2810025M15Rik	404.415	-0.0556637	0.191933	-0.290016	0.771804	0.865664
2810029C07Rik	36.0851	1.83247	0.521082	3.51667	0.000437001	0.00224332
2810032G03Rik	4.65645	-1.49398	1.58964	-0.939818	0.347311	NA
2810047C21Rik1	20.1525	-0.959242	0.685271	-1.3998	0.161573	0.303396
2810049E08Rik	0	NA	NA	NA	NA	NA
2810403A07Rik	1199.9	0.643172	0.156447	4.11111	3.93764e-05	0.000265514
2810403D21Rik	3.98626	1.29123	1.41611	0.91181	0.361869	NA
2810404M03Rik	0	NA	NA	NA	NA	NA
2810405F15Rik	0	NA	NA	NA	NA	NA
2810408A11Rik	103.298	0.843791	0.319454	2.64135	0.00825758	0.0281615
2810408I11Rik	140.405	0.327318	0.304984	1.07323	0.283169	0.454055
2810410L24Rik	48.9458	-1.18428	0.514682	-2.30099	0.0213923	0.0623381
2810417H13Rik	86.8859	2.28001	0.395867	5.75953	8.43479e-09	1.19843e-07
2810428I15Rik	1481.14	0.824796	0.164607	5.01071	5.42306e-07	5.46697e-06
2810429I04Rik	28.8022	0.206954	0.542506	0.381478	0.702849	0.817054
2810433D01Rik	1.41206	-1.26345	2.74534	-0.460214	0.645363	NA
2810442N19Rik	0.676857	-1.27592	4.46455	-0.28579	0.775039	NA
2810454H06Rik	5.36996	1.80304	1.43096	1.26003	0.207659	0.365558
2810459M11Rik	21.0501	0.695585	0.622898	1.11669	0.264126	0.432461
2810468N07Rik	17.6676	0.611256	0.851575	0.717795	0.472884	0.637097
2810471M01Rik	0	NA	NA	NA	NA	NA
2810474O19Rik	652.477	-0.881079	0.251872	-3.49812	0.000468548	0.00238201
2900005J15Rik	25.5106	0.155797	0.60714	0.256608	0.797481	0.881783
2900008C10Rik	16.7724	-0.972984	0.82541	-1.17879	0.238483	0.401545
2900009J06Rik	9.74185	-0.765426	1.01515	-0.754001	0.450849	0.617221
2900011O08Rik	2.50163	-0.881038	2.02173	-0.435783	0.662994	NA
2900026A02Rik	109.578	-1.03588	0.342937	-3.02062	0.00252257	0.010198
2900041M22Rik	1.35758	-3.02552	2.98585	-1.01329	0.310923	NA
2900052N01Rik	0	NA	NA	NA	NA	NA
2900055J20Rik	0	NA	NA	NA	NA	NA
2900057B20Rik	0.139432	0	4.56204	0	1	NA
2900060B14Rik	0.580939	-1.68192	4.37794	-0.384182	0.700844	NA
2900076A07Rik	18.8882	-0.49652	0.673565	-0.737152	0.46103	0.626506
2900079G21Rik	0	NA	NA	NA	NA	NA
2900092C05Rik	1.13052	1.74093	2.74394	0.634461	0.52578	NA
2900092D14Rik	0	NA	NA	NA	NA	NA
2900097C17Rik	6786.02	-0.266014	0.13602	-1.95569	0.0505014	0.124178
3000002C10Rik	34.4729	0.150691	0.537368	0.280424	0.779152	0.870398
3010001F23Rik	1.26582	1.12631	2.63357	0.427675	0.668888	NA
3010026O09Rik	844.049	0.125164	0.179469	0.697415	0.485543	0.647976
3100003L05Rik	0	NA	NA	NA	NA	NA
3110001I22Rik	184.626	0.207669	0.253008	0.8208	0.41176	0.582763
3110002H16Rik	1153.06	-0.352066	0.150858	-2.33376	0.0196082	0.0580558
3110009E18Rik	32.2561	-0.295568	0.541962	-0.545366	0.585502	0.730475
3110009F21Rik	0	NA	NA	NA	NA	NA
3110015C05Rik	0	NA	NA	NA	NA	NA
3110021A11Rik	2.4101	1.3363	1.86911	0.714941	0.474646	NA
3110021N24Rik	320.979	0.360564	0.20286	1.7774	0.0755026	0.171086
3110035E14Rik	130.478	0.74615	0.469933	1.58778	0.112337	0.231591
3110039I08Rik	3.35587	0.722993	1.78331	0.405422	0.685167	NA
3110039M20Rik	0	NA	NA	NA	NA	NA
3110040N11Rik	109.057	-0.506643	0.313934	-1.61385	0.10656	0.222493
3110043O21Rik	1930.2	0.268439	0.130966	2.04968	0.0403958	0.103967
3110045C21Rik	22.3828	0.300849	0.621691	0.48392	0.628442	0.763577
3110052M02Rik	41.763	-0.211395	0.461018	-0.45854	0.646565	0.778461
3110056K07Rik	97.7462	0.0743244	0.347992	0.213581	0.830874	0.901585
3110057O12Rik	319.536	2.0207	0.229747	8.79535	1.42604e-18	7.63819e-17
3110062M04Rik	31.1939	-0.23185	0.549362	-0.422035	0.672999	0.796777
3110070M22Rik	14.4821	1.007	0.80444	1.25181	0.21064	0.369616
3110079O15Rik	0	NA	NA	NA	NA	NA
3110082I17Rik	378.185	-0.281953	0.211052	-1.33594	0.181568	0.330808
3110082J24Rik	18.4836	-0.290616	0.76556	-0.379612	0.704233	0.817994
3110099E03Rik	0.126599	-0.808541	4.56204	-0.177232	0.859326	NA
3200001D21Rik	4.05398	-0.261911	1.41551	-0.185029	0.853206	NA
3300002I08Rik	9.7176	-0.34202	0.986816	-0.34659	0.7289	0.834624
3300002P13Rik	1.93013	-0.433296	2.05859	-0.210482	0.833292	NA
3300005D01Rik	0	NA	NA	NA	NA	NA
3425401B19Rik	0	NA	NA	NA	NA	NA
3632451O06Rik	10.1907	-0.216133	0.971564	-0.222459	0.823957	0.897081
3632454L22Rik	4.03058	0.29043	1.47944	0.196311	0.844367	NA
3830403N18Rik	361.554	1.1444	0.19197	5.96138	2.5011e-09	3.86296e-08
3830406C13Rik	637.085	0.335058	0.164001	2.04302	0.0410506	0.105137
3830408C21Rik	19.6477	1.30362	0.652735	1.99717	0.0458067	0.114873
3830417A13Rik	157.428	-0.0601384	0.260579	-0.230788	0.81748	0.893713
3830432H09Rik	2.78955	-0.84814	1.66362	-0.509816	0.61018	NA
3930402G23Rik	0	NA	NA	NA	NA	NA
4430402I18Rik	25.6478	0.107134	0.604559	0.17721	0.859344	0.91983
4631405J19Rik	0.414964	-0.255342	4.52059	-0.0564842	0.954956	NA
4632404H12Rik	63.3209	0.604862	0.392485	1.54111	0.123291	0.248578
4632415L05Rik	133.993	0.272793	0.308153	0.885251	0.376021	0.548658
4632427E13Rik	4.78344	0.0275731	1.29359	0.0213151	0.982994	NA
4632428C04Rik	2.08421	0.502013	2.01672	0.248926	0.803418	NA
4632428N05Rik	318.169	0.474399	0.19137	2.47896	0.0131766	0.0415157
4732416N19Rik	1.02662	0.13768	3.18459	0.0432331	0.965516	NA
4732456N10Rik	0	NA	NA	NA	NA	NA
4732471J01Rik	78.6506	1.6741	0.360963	4.63787	3.52025e-06	3.00099e-05
4732490B19Rik	3.94829	-0.00505592	1.46618	-0.00344836	0.997249	NA
4732491K20Rik	18.7931	0.13926	0.707917	0.196718	0.844048	0.910159
4831407H17Rik	0.423818	1.59006	4.56093	0.348627	0.727369	NA
4831440E17Rik	10.3942	1.4997	0.892929	1.67953	0.0930483	0.201453
4833411C07Rik	0.149013	1.61011	4.55937	0.353143	0.723981	NA
4833412C05Rik	0.982883	1.74828	2.86709	0.609774	0.542012	NA
4833415N18Rik	0.293967	2.59594	4.44654	0.58381	0.559348	NA
4833417C18Rik	19.2912	-0.839345	0.703065	-1.19384	0.232542	0.395388
4833418N02Rik	5.33554	2.12257	1.24642	1.70294	0.0885801	0.19364
4833419F23Rik	16.6703	0.281587	0.717146	0.39265	0.694578	0.811427
4833420G17Rik	1411.01	-0.287769	0.168392	-1.70892	0.0874662	0.191737
4833422C13Rik	0.553634	0.723137	4.32926	0.167035	0.867343	NA
4833422M21Rik	0.95995	-0.85221	3.11956	-0.273183	0.784712	NA
4833423E24Rik	0	NA	NA	NA	NA	NA
4833427F10Rik	0	NA	NA	NA	NA	NA
4833427G06Rik	0	NA	NA	NA	NA	NA
4833428L15Rik	0	NA	NA	NA	NA	NA
4833439L19Rik	5512.65	-0.881373	0.135103	-6.52373	6.85823e-11	1.39264e-09
4921501E09Rik	0	NA	NA	NA	NA	NA
4921504A21Rik	1.72343	-0.849124	2.27453	-0.373319	0.708911	NA
4921504E06Rik	0	NA	NA	NA	NA	NA
4921506M07Rik	39.128	0.117742	0.501829	0.234625	0.8145	0.891572
4921507L20Rik	8.97117	1.05761	1.0408	1.01615	0.309557	0.482259
4921507P07Rik	122.153	1.29014	0.31882	4.0466	5.19674e-05	0.000339919
4921508D12Rik	0	NA	NA	NA	NA	NA
4921509C19Rik	0	NA	NA	NA	NA	NA
4921509O07Rik	0	NA	NA	NA	NA	NA
4921511C10Rik	0	NA	NA	NA	NA	NA
4921511C20Rik	0	NA	NA	NA	NA	NA
4921511H03Rik	0	NA	NA	NA	NA	NA
4921511I17Rik	0.286138	0.648342	4.55936	0.1422	0.886922	NA
4921511M17Rik	0	NA	NA	NA	NA	NA
4921513I03Rik	0.274251	-1.75087	4.52027	-0.387337	0.698507	NA
4921515E04Rik	0	NA	NA	NA	NA	NA
4921517D22Rik	13.1834	-0.934195	0.845454	-1.10496	0.269176	0.438151
4921518K17Rik	0.686288	-2.25664	3.70045	-0.609829	0.541975	NA
4921524J17Rik	522.648	-0.364536	0.187256	-1.94672	0.0515683	0.126287
4921524L21Rik	0.259575	-1.68171	4.52574	-0.371588	0.7102	NA
4921525O09Rik	0	NA	NA	NA	NA	NA
4921529L05Rik	0.287281	-0.808522	4.56204	-0.177228	0.859329	NA
4921530L21Rik	0	NA	NA	NA	NA	NA
4921531C22Rik	147.744	-0.161624	0.27938	-0.578508	0.562921	0.712321
4921531P14Rik	40.5317	-0.00200737	0.486177	-0.00412888	0.996706	0.998042
4921533I20Rik	7.46197	0.262219	1.20136	0.218268	0.827221	0.89953
4921534H16Rik	0	NA	NA	NA	NA	NA
4921536K21Rik	23.045	-1.19337	0.663367	-1.79896	0.0720244	0.164863
4921539E11Rik	1.36185	-3.2736	2.72052	-1.2033	0.228861	NA
4922502D21Rik	0	NA	NA	NA	NA	NA
4922502H24Rik	0	NA	NA	NA	NA	NA
4922502N22Rik	0.137126	-0.808541	4.56204	-0.177232	0.859326	NA
4930401C15Rik	0	NA	NA	NA	NA	NA
4930401O10Rik	0	NA	NA	NA	NA	NA
4930401O12Rik	0	NA	NA	NA	NA	NA
4930402F06Rik	0	NA	NA	NA	NA	NA
4930402F11Rik	0.553312	-1.65098	4.4469	-0.371266	0.710439	NA
4930402H24Rik	2025.09	-0.432714	0.129212	-3.34888	0.000811399	0.00382625
4930402K13Rik	0.843451	1.74949	3.26574	0.535711	0.592159	NA
4930404A05Rik	0	NA	NA	NA	NA	NA
4930404H11Rik	0	NA	NA	NA	NA	NA
4930404I05Rik	7.92421	0.533501	1.00854	0.528981	0.596819	0.739976
4930404N11Rik	131.835	-0.0399519	0.298098	-0.134023	0.893385	0.941054
4930405A10Rik	0	NA	NA	NA	NA	NA
4930405A21Rik	21.6829	1.49301	0.635495	2.34936	0.0188055	0.0560651
4930405D11Rik	0	NA	NA	NA	NA	NA
4930405J17Rik	0.144955	1.59004	4.56093	0.348623	0.727373	NA
4930405L22Rik	0.132976	-0.808541	4.56204	-0.177232	0.859326	NA
4930405O22Rik	0.542508	-2.311	4.42646	-0.522088	0.601609	NA
4930406D18Rik	0.137126	-0.808541	4.56204	-0.177232	0.859326	NA
4930407G08Rik	0	NA	NA	NA	NA	NA
4930407I10Rik	1.72723	3.62959	2.59228	1.40016	0.161467	NA
4930407I19Rik	0	NA	NA	NA	NA	NA
4930412B13Rik	0	NA	NA	NA	NA	NA
4930412C18Rik	5.45321	-1.46864	1.32279	-1.11026	0.266886	0.435573
4930412O13Rik	0	NA	NA	NA	NA	NA
4930413E15Rik	0	NA	NA	NA	NA	NA
4930413F20Rik	0.52881	-0.776264	4.48575	-0.173051	0.862611	NA
4930413G21Rik	196.453	-0.658006	0.241898	-2.72018	0.00652465	0.023118
4930413M19Rik	0	NA	NA	NA	NA	NA
4930414N06Rik	18.7502	1.23149	0.747323	1.64787	0.0993785	0.211196
4930415F15Rik	6.57446	-1.35851	1.15746	-1.1737	0.240515	0.403741
4930415L06Rik	0	NA	NA	NA	NA	NA
4930415O20Rik	1.51357	-3.72429	2.63165	-1.41519	0.157012	NA
4930417O13Rik	0.132976	-0.808541	4.56204	-0.177232	0.859326	NA
4930417O22Rik	3.19603	-1.42494	1.86928	-0.762294	0.445885	NA
4930419G24Rik	0	NA	NA	NA	NA	NA
4930423M02Rik	0.126599	-0.808541	4.56204	-0.177232	0.859326	NA
4930425K10Rik	0	NA	NA	NA	NA	NA
4930425L21Rik	0	NA	NA	NA	NA	NA
4930425O10Rik	6.35662	0.747419	1.15073	0.649516	0.516005	0.673921
4930426D05Rik	0.139432	0	4.56204	0	1	NA
4930426L09Rik	1.56799	1.71003	2.3898	0.715554	0.474267	NA
4930427A07Rik	669.227	0.888011	0.180576	4.91767	8.75809e-07	8.46814e-06
4930428D20Rik	0	NA	NA	NA	NA	NA
4930428E07Rik	0	NA	NA	NA	NA	NA
4930428G15Rik	0	NA	NA	NA	NA	NA
4930428O21Rik	0.979112	0.743323	2.62963	0.282672	0.777428	NA
4930429B21Rik	0.379798	-2.23316	4.48847	-0.497532	0.618814	NA
4930429D17Rik	0.263725	-1.70143	4.52415	-0.376076	0.70686	NA
4930429F11Rik	0	NA	NA	NA	NA	NA
4930429F24Rik	2.68318	-0.874213	1.95111	-0.44806	0.65411	NA
4930430A15Rik	0	NA	NA	NA	NA	NA
4930430F08Rik	121.777	-0.198285	0.299065	-0.663017	0.50732	0.666429
4930430F21Rik	0	NA	NA	NA	NA	NA
4930430J02Rik	0.27793	0.628264	4.56093	0.137749	0.890439	NA
4930431F12Rik	0	NA	NA	NA	NA	NA
4930431P03Rik	0	NA	NA	NA	NA	NA
4930432J09Rik	0	NA	NA	NA	NA	NA
4930432K21Rik	708.635	1.12789	0.181178	6.2253	4.80625e-10	8.39494e-09
4930432M17Rik	0	NA	NA	NA	NA	NA
4930433B08Rik	0	NA	NA	NA	NA	NA
4930433I11Rik	0.278863	0	4.56204	0	1	NA
4930433N12Rik	35.4545	1.17257	0.522005	2.24628	0.0246859	0.0699664
4930434J06Rik	0	NA	NA	NA	NA	NA
4930435E12Rik	0	NA	NA	NA	NA	NA
4930438E09Rik	0	NA	NA	NA	NA	NA
4930440C22Rik	0	NA	NA	NA	NA	NA
4930440I19Rik	0.410906	-0.275431	4.52217	-0.0609069	0.951433	NA
4930441H08Rik	0	NA	NA	NA	NA	NA
4930441J16Rik	0	NA	NA	NA	NA	NA
4930442J19Rik	0.144955	1.59004	4.56093	0.348623	0.727373	NA
4930442L01Rik	16.3603	0.75494	0.771334	0.978747	0.327705	0.501341
4930443O20Rik	0	NA	NA	NA	NA	NA
4930444F02Rik	0.137126	-0.808541	4.56204	-0.177232	0.859326	NA
4930444G20Rik	4.02706	0.543002	1.40234	0.387211	0.6986	NA
4930444M15Rik	0.5576	0.778788	4.31671	0.180412	0.856829	NA
4930444P10Rik	1.28275	1.72609	2.71505	0.635748	0.524941	NA
4930445N18Rik	0.139432	0	4.56204	0	1	NA
4930447A16Rik	0	NA	NA	NA	NA	NA
4930447C04Rik	1102.73	2.37628	0.613048	3.87616	0.000106117	0.000643411
4930447F24Rik	1.42541	0.739129	2.57545	0.28699	0.77412	NA
4930447J18Rik	0	NA	NA	NA	NA	NA
4930447K03Rik	1.54343	-1.10114	2.42262	-0.454525	0.649451	NA
4930447M23Rik	0.288444	1.61014	4.55936	0.35315	0.723976	NA
4930447N08Rik	0.139432	0	4.56204	0	1	NA
4930448C13Rik	0	NA	NA	NA	NA	NA
4930448F12Rik	0	NA	NA	NA	NA	NA
4930448H16Rik	0.568127	0.729187	4.28801	0.170052	0.864969	NA
4930448I06Rik	0	NA	NA	NA	NA	NA
4930448I18Rik	0	NA	NA	NA	NA	NA
4930448K20Rik	0.271554	0.628264	4.56093	0.137749	0.890439	NA
4930449E01Rik	0	NA	NA	NA	NA	NA
4930449E18Rik	0	NA	NA	NA	NA	NA
4930449I24Rik	0	NA	NA	NA	NA	NA
4930451G09Rik	176.648	1.22097	0.249009	4.90333	9.42236e-07	9.02372e-06
4930451I11Rik	0	NA	NA	NA	NA	NA
4930452A19Rik	0	NA	NA	NA	NA	NA
4930452B06Rik	208.388	-0.937897	0.251868	-3.72377	0.000196273	0.00110289
4930452G13Rik	0.711491	-2.33681	4.07327	-0.573693	0.566175	NA
4930452N14Rik	0	NA	NA	NA	NA	NA
4930453H23Rik	0	NA	NA	NA	NA	NA
4930453L07Rik	0	NA	NA	NA	NA	NA
4930453N24Rik	1286.42	-0.0551559	0.142579	-0.386845	0.698871	0.814499
4930455B14Rik	0	NA	NA	NA	NA	NA
4930455C13Rik	6.30624	0.942908	1.34605	0.7005	0.483615	0.646468
4930455D15Rik	0.275612	0.648342	4.55936	0.1422	0.886922	NA
4930455F16Rik	1.47914	-0.661379	2.387	-0.277075	0.781723	NA
4930455G09Rik	2.49874	0.910442	1.76857	0.51479	0.6067	NA
4930455H04Rik	0	NA	NA	NA	NA	NA
4930455J16Rik	0	NA	NA	NA	NA	NA
4930456L15Rik	0.266031	-0.808523	4.56204	-0.177228	0.859329	NA
4930459C07Rik	0	NA	NA	NA	NA	NA
4930459L07Rik	0	NA	NA	NA	NA	NA
4930461G14Rik	0	NA	NA	NA	NA	NA
4930463O16Rik	0	NA	NA	NA	NA	NA
4930465K10Rik	17.9228	0.978741	0.734038	1.33337	0.182412	0.331804
4930465M20Rik	0	NA	NA	NA	NA	NA
4930467D21Rik	44.5148	1.06459	0.488779	2.17807	0.0294012	0.0808134
4930467E23Rik	2.18615	0.0183164	2.19908	0.00832913	0.993354	NA
4930467K11Rik	0.417362	0.628277	4.56093	0.137752	0.890437	NA
4930469G21Rik	0.390324	-2.26876	4.48651	-0.505685	0.613078	NA
4930470H14Rik	0	NA	NA	NA	NA	NA
4930470O06Rik	0	NA	NA	NA	NA	NA
4930470P17Rik	3.31842	-1.59862	1.62505	-0.983738	0.325244	NA
4930471C04Rik	0.149013	1.61011	4.55937	0.353143	0.723981	NA
4930471G03Rik	0	NA	NA	NA	NA	NA
4930471M09Rik	1.1031	-1.83826	2.86332	-0.642003	0.520871	NA
4930473A02Rik	9.35848	0.817338	1.20937	0.675839	0.499143	0.659668
4930473O22Rik	0	NA	NA	NA	NA	NA
4930474G06Rik	0	NA	NA	NA	NA	NA
4930474H20Rik	0	NA	NA	NA	NA	NA
4930474M22Rik	0	NA	NA	NA	NA	NA
4930474N05Rik	0	NA	NA	NA	NA	NA
4930474N09Rik	0.309695	1.61014	4.55936	0.353151	0.723975	NA
4930477N07Rik	2.51623	-1.05354	2.2044	-0.477924	0.632704	NA
4930478L05Rik	0.149013	1.61011	4.55937	0.353143	0.723981	NA
4930478P22Rik	0	NA	NA	NA	NA	NA
4930479D17Rik	11.1339	0.842238	0.849734	0.991178	0.321599	0.494397
4930480E11Rik	0	NA	NA	NA	NA	NA
4930480G23Rik	0	NA	NA	NA	NA	NA
4930480K15Rik	0	NA	NA	NA	NA	NA
4930480K23Rik	27.7748	0.459431	0.570136	0.805827	0.420343	0.590376
4930480M12Rik	0	NA	NA	NA	NA	NA
4930481A15Rik	59.1706	0.242332	0.422037	0.574196	0.565835	0.714607
4930482G09Rik	0	NA	NA	NA	NA	NA
4930483J18Rik	0.983816	2.21331	3.21929	0.687516	0.491757	NA
4930483K19Rik	6.69659	-0.949158	1.2307	-0.771234	0.440568	0.608443
4930483O08Rik	0	NA	NA	NA	NA	NA
4930484H19Rik	0	NA	NA	NA	NA	NA
4930486F22Rik	0	NA	NA	NA	NA	NA
4930486I03Rik	0	NA	NA	NA	NA	NA
4930486L24Rik	137.288	-0.150432	0.529395	-0.284158	0.776289	0.868568
4930487D11Rik	0	NA	NA	NA	NA	NA
4930487H11Rik	0	NA	NA	NA	NA	NA
4930488B22Rik	0	NA	NA	NA	NA	NA
4930488L21Rik	0.139432	0	4.56204	0	1	NA
4930500F04Rik	0	NA	NA	NA	NA	NA
4930500L23Rik	0.144955	1.59004	4.56093	0.348623	0.727373	NA
4930502A04Rik	0	NA	NA	NA	NA	NA
4930502E09Rik	1.45391	-4.01913	2.8185	-1.42598	0.153873	NA
4930502E18Rik	803.198	-0.168844	0.17996	-0.938232	0.348125	0.522445
4930503B20Rik	0.989029	0.741291	2.97633	0.249062	0.803313	NA
4930503E14Rik	10.4905	-0.245728	0.976317	-0.251688	0.801282	0.884195
4930503E24Rik	46.0781	0.270924	0.48778	0.555422	0.578606	0.724674
4930503F20Rik	0	NA	NA	NA	NA	NA
4930503H13Rik	0	NA	NA	NA	NA	NA
4930503L19Rik	296.213	-0.176442	0.246136	-0.716847	0.473469	0.637671
4930503O07Rik	0	NA	NA	NA	NA	NA
4930504C09Rik	0	NA	NA	NA	NA	NA
4930504O13Rik	44.8439	0.00736885	0.503829	0.0146257	0.988331	0.994264
4930505A04Rik	0.436294	0.648375	4.55936	0.142207	0.886916	NA
4930505G20Rik	0	NA	NA	NA	NA	NA
4930505K13Rik	0	NA	NA	NA	NA	NA
4930505K14Rik	0	NA	NA	NA	NA	NA
4930506A18Rik	2.95959	1.02425	1.69017	0.606003	0.544513	NA
4930506C21Rik	18.0167	0.645092	0.699586	0.922106	0.356473	0.531151
4930507D05Rik	8.9319	1.14636	0.959359	1.19492	0.232118	0.394857
4930507D10Rik	0	NA	NA	NA	NA	NA
4930509E16Rik	57.4835	0.0644299	0.40607	0.158667	0.873931	0.928994
4930509J09Rik	0	NA	NA	NA	NA	NA
4930509K18Rik	0	NA	NA	NA	NA	NA
4930511A02Rik	0	NA	NA	NA	NA	NA
4930511A08Rik	0.28208	0.628264	4.56093	0.137749	0.890439	NA
4930511E03Rik	0.149013	1.61011	4.55937	0.353143	0.723981	NA
4930511M06Rik	2.27668	1.56287	1.85707	0.84158	0.400023	NA
4930512B01Rik	1.11586	1.15579	2.71141	0.426271	0.66991	NA
4930512J16Rik	0.265951	-1.71223	4.52329	-0.378537	0.705032	NA
4930512M02Rik	0.126599	-0.808541	4.56204	-0.177232	0.859326	NA
4930513D17Rik	0	NA	NA	NA	NA	NA
4930513N10Rik	94.6696	0.692668	0.316968	2.18529	0.0288673	0.0797434
4930513O06Rik	0	NA	NA	NA	NA	NA
4930515B02Rik	0	NA	NA	NA	NA	NA
4930515G01Rik	17.0989	-1.27459	0.75962	-1.67794	0.0933594	0.201942
4930515G16Rik	0.137126	-0.808541	4.56204	-0.177232	0.859326	NA
4930515L03Rik	0	NA	NA	NA	NA	NA
4930515L19Rik	0	NA	NA	NA	NA	NA
4930517E11Rik	0	NA	NA	NA	NA	NA
4930517M08Rik	0	NA	NA	NA	NA	NA
4930518J21Rik	0	NA	NA	NA	NA	NA
4930518P08Rik	0.562696	-0.29385	4.42691	-0.0663783	0.947077	NA
4930519D14Rik	0	NA	NA	NA	NA	NA
4930519F09Rik	12.0395	0.244607	0.89443	0.273478	0.784486	0.873171
4930519F16Rik	0	NA	NA	NA	NA	NA
4930519F24Rik	0	NA	NA	NA	NA	NA
4930519G04Rik	0.137126	-0.808541	4.56204	-0.177232	0.859326	NA
4930519H02Rik	0.160682	0	4.56204	0	1	NA
4930519K11Rik	0	NA	NA	NA	NA	NA
4930520O04Rik	3.14967	-1.45478	1.69534	-0.858105	0.390835	NA
4930520P13Rik	0	NA	NA	NA	NA	NA
4930521E06Rik	0	NA	NA	NA	NA	NA
4930522H14Rik	0	NA	NA	NA	NA	NA
4930522O17Rik	0	NA	NA	NA	NA	NA
4930523C07Rik	36.198	2.50495	0.539458	4.64345	3.42639e-06	2.92448e-05
4930523O13Rik	0	NA	NA	NA	NA	NA
4930524B15Rik	819.559	0.986556	0.152155	6.48389	8.93893e-11	1.77205e-09
4930524B17Rik	0	NA	NA	NA	NA	NA
4930524C18Rik	0	NA	NA	NA	NA	NA
4930524N10Rik	0	NA	NA	NA	NA	NA
4930524O05Rik	0	NA	NA	NA	NA	NA
4930524O08Rik	0.132976	-0.808541	4.56204	-0.177232	0.859326	NA
4930525C09Rik	0	NA	NA	NA	NA	NA
4930525D18Rik	0.678689	-1.25212	3.65171	-0.342886	0.731684	NA
4930525G20Rik	0.297808	-0.808522	4.56204	-0.177228	0.859329	NA
4930526H09Rik	0	NA	NA	NA	NA	NA
4930526I15Rik	206.908	0.379427	0.232485	1.63205	0.102669	0.216535
4930526L06Rik	1.86083	2.43136	2.44824	0.993108	0.320657	NA
4930527F14Rik	1.14535	1.63417	2.88373	0.566688	0.570926	NA
4930527G23Rik	0	NA	NA	NA	NA	NA
4930528A17Rik	4.12351	0.281855	1.39443	0.202129	0.839816	NA
4930528D03Rik	1.13981	0.291897	2.69326	0.108381	0.913694	NA
4930528G23Rik	0.160682	0	4.56204	0	1	NA
4930528H21Rik	0	NA	NA	NA	NA	NA
4930528P14Rik	0	NA	NA	NA	NA	NA
4930529C04Rik	271.915	0.380818	0.213067	1.78732	0.073886	0.168175
4930529K09Rik	0	NA	NA	NA	NA	NA
4930529L06Rik	0	NA	NA	NA	NA	NA
4930532I03Rik	0	NA	NA	NA	NA	NA
4930532M18Rik	0	NA	NA	NA	NA	NA
4930533B01Rik	0	NA	NA	NA	NA	NA
4930533N22Rik	0	NA	NA	NA	NA	NA
4930533P14Rik	0	NA	NA	NA	NA	NA
4930538K18Rik	13.7896	-0.800204	0.84526	-0.946695	0.343794	0.517862
4930539C22Rik	0	NA	NA	NA	NA	NA
4930539E08Rik	311.463	0.274318	0.212747	1.28941	0.197255	0.351979
4930539J05Rik	90.6865	0.0661123	0.331704	0.199311	0.842019	0.908971
4930539M17Rik	0	NA	NA	NA	NA	NA
4930539N22Rik	0	NA	NA	NA	NA	NA
4930540M03Rik	0	NA	NA	NA	NA	NA
4930542C21Rik	0	NA	NA	NA	NA	NA
4930542D17Rik	0	NA	NA	NA	NA	NA
4930543E12Rik	0.139432	0	4.56204	0	1	NA
4930543N07Rik	0	NA	NA	NA	NA	NA
4930544D05Rik	0	NA	NA	NA	NA	NA
4930544G11Rik	0.270101	-1.73164	4.52176	-0.382958	0.701751	NA
4930544M13Rik	0	NA	NA	NA	NA	NA
4930545E07Rik	0	NA	NA	NA	NA	NA
4930545H06Rik	0	NA	NA	NA	NA	NA
4930545L23Rik	0	NA	NA	NA	NA	NA
4930546C10Rik	0.271554	0.628264	4.56093	0.137749	0.890439	NA
4930546K05Rik	0.506397	-2.64685	4.46839	-0.59235	0.553616	NA
4930547E08Rik	0.272407	-0.808523	4.56204	-0.177228	0.859329	NA
4930547E14Rik	1.57101	1.28303	2.56422	0.50036	0.616822	NA
4930548G14Rik	0	NA	NA	NA	NA	NA
4930548H24Rik	1.0016	0.155654	3.20778	0.0485238	0.961299	NA
4930548J01Rik	0	NA	NA	NA	NA	NA
4930548K13Rik	0	NA	NA	NA	NA	NA
4930549C01Rik	0.126599	-0.808541	4.56204	-0.177232	0.859326	NA
4930549C15Rik	0	NA	NA	NA	NA	NA
4930549G23Rik	4.7816	0.750092	1.32317	0.566889	0.570789	NA
4930550C14Rik	12.9188	-0.856253	0.839159	-1.02037	0.307553	0.480454
4930550C17Rik	0	NA	NA	NA	NA	NA
4930550L24Rik	1905.07	-0.0982311	0.139941	-0.701948	0.482712	0.646046
4930552N02Rik	0	NA	NA	NA	NA	NA
4930552P12Rik	22.3774	0.35891	0.650242	0.551964	0.580973	0.726741
4930553C11Rik	0	NA	NA	NA	NA	NA
4930553E22Rik	0.266031	-0.808523	4.56204	-0.177228	0.859329	NA
4930554C24Rik	0	NA	NA	NA	NA	NA
4930554G24Rik	0	NA	NA	NA	NA	NA
4930554H23Rik	0.139432	0	4.56204	0	1	NA
4930554I06Rik	0	NA	NA	NA	NA	NA
4930555B11Rik	0	NA	NA	NA	NA	NA
4930555B12Rik	0	NA	NA	NA	NA	NA
4930555G01Rik	4.49711	1.43374	1.40324	1.02174	0.306906	NA
4930555G21Rik	0	NA	NA	NA	NA	NA
4930555K05Rik	0	NA	NA	NA	NA	NA
4930556C24Rik	0.546856	-2.25497	4.41765	-0.510447	0.609738	NA
4930556G01Rik	0	NA	NA	NA	NA	NA
4930556J02Rik	0	NA	NA	NA	NA	NA
4930556M19Rik	19.4056	0.203682	0.711306	0.286349	0.774611	0.867131
4930556N09Rik	0	NA	NA	NA	NA	NA
4930556N13Rik	0.563759	-2.31094	4.37166	-0.528619	0.59707	NA
4930557A04Rik	0	NA	NA	NA	NA	NA
4930557F10Rik	0	NA	NA	NA	NA	NA
4930557J02Rik	3.69447	-0.257342	1.45445	-0.176934	0.85956	NA
4930557K07Rik	3.65032	0.498653	1.6937	0.294417	0.768439	NA
4930558C23Rik	0.139432	0	4.56204	0	1	NA
4930558F17Rik	0	NA	NA	NA	NA	NA
4930558G05Rik	0	NA	NA	NA	NA	NA
4930558J18Rik	205.056	-0.306233	0.23801	-1.28664	0.198219	0.35328
4930558K02Rik	1.69418	0.775665	2.41669	0.320962	0.748239	NA
4930559C10Rik	0	NA	NA	NA	NA	NA
4930562C15Rik	2.42884	-4.72645	2.43295	-1.94268	0.0520547	NA
4930562F07Rik	1.63268	2.02955	2.45327	0.827286	0.408075	NA
4930563D23Rik	0.137126	-0.808541	4.56204	-0.177232	0.859326	NA
4930563E18Rik	1.39234	0.392685	2.52648	0.155428	0.876484	NA
4930563E22Rik	13.5171	0.698052	0.817622	0.85376	0.393238	0.565571
4930563F08Rik	0.27793	0.628264	4.56093	0.137749	0.890439	NA
4930563H07Rik	0	NA	NA	NA	NA	NA
4930563M20Rik	5.66474	-1.14419	1.2171	-0.940099	0.347167	0.521503
4930563M21Rik	0.690668	0.152764	3.21904	0.0474565	0.962149	NA
4930564B18Rik	0	NA	NA	NA	NA	NA
4930564C03Rik	0	NA	NA	NA	NA	NA
4930564D02Rik	0	NA	NA	NA	NA	NA
4930565D16Rik	0	NA	NA	NA	NA	NA
4930565N06Rik	31.6954	0.679328	0.708915	0.958265	0.337929	0.511634
4930567H12Rik	0.278863	0	4.56204	0	1	NA
4930567H17Rik	0	NA	NA	NA	NA	NA
4930567J20Rik	0	NA	NA	NA	NA	NA
4930567K12Rik	0	NA	NA	NA	NA	NA
4930567K20Rik	0	NA	NA	NA	NA	NA
4930568D16Rik	0	NA	NA	NA	NA	NA
4930568E12Rik	0	NA	NA	NA	NA	NA
4930568G15Rik	0	NA	NA	NA	NA	NA
4930570G19Rik	0.28208	0.628264	4.56093	0.137749	0.890439	NA
4930571K23Rik	0.126599	-0.808541	4.56204	-0.177232	0.859326	NA
4930571O06Rik	0	NA	NA	NA	NA	NA
4930572K03Rik	0	NA	NA	NA	NA	NA
4930572O03Rik	3.40345	-2.58639	1.82287	-1.41885	0.155942	NA
4930572O13Rik	0	NA	NA	NA	NA	NA
4930573O16Rik	0	NA	NA	NA	NA	NA
4930577N17Rik	8.43352	-0.0814589	1.07235	-0.0759631	0.939448	0.968337
4930578C19Rik	0	NA	NA	NA	NA	NA
4930578E11Rik	0	NA	NA	NA	NA	NA
4930578I06Rik	0	NA	NA	NA	NA	NA
4930578M01Rik	0.284386	1.59006	4.56093	0.348626	0.72737	NA
4930578N18Rik	0	NA	NA	NA	NA	NA
4930579F01Rik	0.132976	-0.808541	4.56204	-0.177232	0.859326	NA
4930579G18Rik	6.21211	0.801558	1.11676	0.717755	0.472908	0.637097
4930579G24Rik	460.184	1.85451	0.212159	8.74115	2.30752e-18	1.19536e-16
4930579H20Rik	0	NA	NA	NA	NA	NA
4930579J19Rik	0	NA	NA	NA	NA	NA
4930579K19Rik	19.7226	-0.658479	0.688621	-0.956229	0.338957	0.51262
4930579P08Rik	0	NA	NA	NA	NA	NA
4930581F22Rik	5.50925	0.458594	1.21835	0.376407	0.706615	0.819955
4930583K01Rik	3.37464	1.23187	1.72883	0.712546	0.476127	NA
4930583P06Rik	0	NA	NA	NA	NA	NA
4930584F24Rik	0	NA	NA	NA	NA	NA
4930586N03Rik	0	NA	NA	NA	NA	NA
4930587E11Rik	0	NA	NA	NA	NA	NA
4930590J08Rik	3.38125	0.442136	1.44772	0.305402	0.76006	NA
4930590L20Rik	0.417362	0.628277	4.56093	0.137752	0.890437	NA
4930591A17Rik	0.563838	-1.70149	3.97977	-0.427535	0.668989	NA
4930591E09Rik	0	NA	NA	NA	NA	NA
4930592A05Rik	0	NA	NA	NA	NA	NA
4930592I03Rik	0.27793	0.628264	4.56093	0.137749	0.890439	NA
4930593A02Rik	0.850115	0.735494	3.63935	0.202095	0.839842	NA
4930593C16Rik	0.549484	0.742746	4.34095	0.171102	0.864143	NA
4930594C11Rik	160.139	0.274057	0.262761	1.04299	0.296953	0.46923
4930594O21Rik	0.861864	0.757182	3.10778	0.24364	0.807509	NA
4930595D18Rik	0.126599	-0.808541	4.56204	-0.177232	0.859326	NA
4930595M18Rik	10.6944	0.0319393	0.974717	0.0327677	0.97386	0.987073
4930596D02Rik	0	NA	NA	NA	NA	NA
4930596I21Rik	0.28208	0.628264	4.56093	0.137749	0.890439	NA
4930597A21Rik	0.132976	-0.808541	4.56204	-0.177232	0.859326	NA
4930597G03Rik	0	NA	NA	NA	NA	NA
4930598F16Rik	0	NA	NA	NA	NA	NA
4930599N23Rik	190.886	0.237065	0.248996	0.95208	0.341056	0.514899
4931402G19Rik	4.70419	-0.753698	1.34417	-0.560718	0.57499	NA
4931403E22Rik	0	NA	NA	NA	NA	NA
4931403G20Rik	2.82264	-0.997765	1.88854	-0.528326	0.597273	NA
4931406B18Rik	0	NA	NA	NA	NA	NA
4931406C07Rik	1616.56	-0.325434	0.152974	-2.12738	0.0333884	0.0892833
4931406H21Rik	0	NA	NA	NA	NA	NA
4931406P16Rik	6266.83	0.502861	0.122695	4.09847	4.15897e-05	0.000278826
4931408C20Rik	0	NA	NA	NA	NA	NA
4931408D14Rik	12.3001	1.21061	0.895606	1.35172	0.176464	0.324027
4931409K22Rik	1.25233	0.442615	2.7846	0.158951	0.873708	NA
4931414P19Rik	197.4	-1.32153	0.308955	-4.27744	1.89059e-05	0.000136357
4931417E11Rik	0	NA	NA	NA	NA	NA
4931419H13Rik	0	NA	NA	NA	NA	NA
4931420L22Rik	0	NA	NA	NA	NA	NA
4931423N10Rik	3.71606	-1.38472	1.74605	-0.79306	0.427743	NA
4931428F04Rik	257.916	0.103912	0.232705	0.446539	0.655208	0.78521
4931428L18Rik	5.69311	-1.9291	1.38669	-1.39116	0.164178	0.307312
4931429I11Rik	0.826433	-1.63026	3.81125	-0.42775	0.668833	NA
4931429L15Rik	1.34151	-2.26599	2.6822	-0.844822	0.39821	NA
4931429P17Rik	0	NA	NA	NA	NA	NA
4931430N09Rik	0	NA	NA	NA	NA	NA
4931431B13Rik	0.137126	-0.808541	4.56204	-0.177232	0.859326	NA
4931431C16Rik	2.89835	-1.25023	1.68597	-0.741547	0.458362	NA
4931431F19Rik	0	NA	NA	NA	NA	NA
4931440F15Rik	53.0399	0.705432	0.428568	1.64602	0.0997595	0.211815
4931440J10Rik	0.422885	1.61596	4.44803	0.363298	0.716382	NA
4931440P22Rik	22.5971	1.37425	0.617482	2.22556	0.0260434	0.073229
4932411E22Rik	0	NA	NA	NA	NA	NA
4932411N23Rik	0	NA	NA	NA	NA	NA
4932412D23Rik	6.0192	-1.2446	1.26793	-0.981599	0.326297	0.499726
4932413F04Rik	0	NA	NA	NA	NA	NA
4932414J04Rik	0	NA	NA	NA	NA	NA
4932414N04Rik	0	NA	NA	NA	NA	NA
4932415M13Rik	0	NA	NA	NA	NA	NA
4932416H05Rik	60.5359	0.511769	0.381347	1.342	0.179594	0.328078
4932416K20Rik	0.126599	-0.808541	4.56204	-0.177232	0.859326	NA
4932418E24Rik	0.126599	-0.808541	4.56204	-0.177232	0.859326	NA
4932429P05Rik	0	NA	NA	NA	NA	NA
4932435O22Rik	1.07548	-2.08166	3.06781	-0.67855	0.497423	NA
4932438A13Rik	6316.05	0.197621	0.181507	1.08877	0.276253	0.446244
4932438H23Rik	0.288444	1.61014	4.55936	0.35315	0.723976	NA
4932441J04Rik	0.132976	-0.808541	4.56204	-0.177232	0.859326	NA
4932443I19Rik	0	NA	NA	NA	NA	NA
4932702P03Rik	1.52268	-1.07361	2.24087	-0.479105	0.631864	NA
4933400A11Rik	0	NA	NA	NA	NA	NA
4933400B14Rik	0	NA	NA	NA	NA	NA
4933400C23Rik	0.554475	0.648197	4.47053	0.144993	0.884716	NA
4933400F21Rik	0.442762	0.628277	4.56093	0.137752	0.890436	NA
4933400L20Rik	0	NA	NA	NA	NA	NA
4933401B06Rik	0.398927	-2.29752	4.48496	-0.512271	0.608461	NA
4933401D09Rik	2.24306	-0.258806	1.96549	-0.131675	0.895241	NA
4933401H06Rik	0	NA	NA	NA	NA	NA
4933402C06Rik	0	NA	NA	NA	NA	NA
4933402D24Rik	1.57497	-1.26787	2.51703	-0.503714	0.614463	NA
4933402E13Rik	1260.14	1.1299	0.608949	1.8555	0.0635249	0.14916
4933402J07Rik	41.549	-0.796832	0.49328	-1.61538	0.106229	0.221999
4933402J10Rik	0	NA	NA	NA	NA	NA
4933402J15Rik	0	NA	NA	NA	NA	NA
4933402N03Rik	0	NA	NA	NA	NA	NA
4933402N22Rik	0	NA	NA	NA	NA	NA
4933402P03Rik	0.149013	1.61011	4.55937	0.353143	0.723981	NA
4933403O08Rik	203.952	-0.460287	0.261907	-1.75744	0.0788424	0.177436
4933404G15Rik	0	NA	NA	NA	NA	NA
4933404K08Rik	0.149013	1.61011	4.55937	0.353143	0.723981	NA
4933404K13Rik	17.2161	-0.301742	0.868839	-0.347293	0.728371	0.834288
4933404O12Rik	87.8628	1.21406	0.33102	3.66765	0.000244789	0.00134516
4933405D12Rik	1.83577	-0.083881	2.07853	-0.0403558	0.967809	NA
4933405E24Rik	0	NA	NA	NA	NA	NA
4933405L10Rik	1.40845	1.47147	2.31156	0.636569	0.524405	NA
4933405O20Rik	0	NA	NA	NA	NA	NA
4933406C10Rik	2.44903	1.33824	1.7892	0.747956	0.454487	NA
4933406D12Rik	0	NA	NA	NA	NA	NA
4933406F09Rik	0	NA	NA	NA	NA	NA
4933406G16Rik	0	NA	NA	NA	NA	NA
4933406I18Rik	1.56059	1.54612	2.27345	0.680074	0.496458	NA
4933406J08Rik	526.856	1.42192	0.192695	7.3791	1.5936e-13	4.68315e-12
4933406J10Rik	0	NA	NA	NA	NA	NA
4933406K04Rik	1.28743	-1.58754	2.83787	-0.559413	0.57588	NA
4933406M09Rik	0.259575	-1.68171	4.52574	-0.371588	0.7102	NA
4933407E24Rik	0	NA	NA	NA	NA	NA
4933407G14Rik	0.284386	1.59006	4.56093	0.348626	0.72737	NA
4933407I05Rik	0.144955	1.59004	4.56093	0.348623	0.727373	NA
4933407K13Rik	64.6011	-1.58221	0.432222	-3.66064	0.00025159	0.00137455
4933407L21Rik	0.744846	2.23734	3.89765	0.574022	0.565953	NA
4933408B17Rik	9.89416	1.0651	0.923834	1.15292	0.248945	0.414295
4933408J17Rik	0.542588	-1.7014	4.47271	-0.380396	0.703651	NA
4933408N05Rik	0.149013	1.61011	4.55937	0.353143	0.723981	NA
4933409G03Rik	0	NA	NA	NA	NA	NA
4933409K07Rik	15.8383	0.0286439	0.774709	0.0369737	0.970506	0.985221
4933411E08Rik	0.700815	1.29664	4.36829	0.29683	0.766597	NA
4933411G06Rik	0	NA	NA	NA	NA	NA
4933411K16Rik	0.137126	-0.808541	4.56204	-0.177232	0.859326	NA
4933412E12Rik	27.9477	-0.356834	0.607772	-0.587119	0.557124	0.707761
4933412E24Rik	5.66387	0.488856	1.4851	0.329173	0.742025	0.844272
4933412O06Rik	0.137126	-0.808541	4.56204	-0.177232	0.859326	NA
4933413G19Rik	0.975446	-0.623368	3.15795	-0.197397	0.843517	NA
4933413J09Rik	4.05277	0.86361	1.42413	0.606411	0.544242	NA
4933413L06Rik	0	NA	NA	NA	NA	NA
4933415F23Rik	36.6679	-2.01887	0.550955	-3.66431	0.000248002	0.0013607
4933416C03Rik	2462.04	0.775612	0.148365	5.22772	1.71611e-07	1.9195e-06
4933416E03Rik	0	NA	NA	NA	NA	NA
4933416I08Rik	0.144955	1.59004	4.56093	0.348623	0.727373	NA
4933416M06Rik	0	NA	NA	NA	NA	NA
4933416M07Rik	13.4196	-0.607149	0.822237	-0.738411	0.460265	0.625954
4933417A18Rik	0	NA	NA	NA	NA	NA
4933417D19Rik	24.3148	-0.46438	0.622034	-0.746551	0.455335	0.621683
4933417E11Rik	0.139432	0	4.56204	0	1	NA
4933417G07Rik	26.6727	-0.307683	0.571699	-0.538191	0.590445	0.734592
4933417O13Rik	0.259575	-1.68171	4.52574	-0.371588	0.7102	NA
4933421I07Rik	1.24621	-0.56796	2.50948	-0.226326	0.820948	NA
4933421O10Rik	45.902	0.322377	0.442129	0.729147	0.465912	0.630838
4933422A05Rik	0.711906	0.807838	3.98498	0.202721	0.839353	NA
4933424G05Rik	5.78858	0.380242	1.13937	0.333729	0.738584	0.841707
4933424G06Rik	0.408679	-0.264623	4.52303	-0.0585057	0.953346	NA
4933425B07Rik	0	NA	NA	NA	NA	NA
4933425L06Rik	28.2586	-2.00542	0.651069	-3.0802	0.00206863	0.00858291
4933427D06Rik	4996.78	2.03598	0.160513	12.6842	7.2339e-37	1.80137e-34
4933427D14Rik	299.913	0.604732	0.281391	2.14908	0.0316281	0.0856734
4933427E11Rik	7.09871	0.813397	1.05078	0.774085	0.438881	0.606849
4933427E13Rik	0	NA	NA	NA	NA	NA
4933427G17Rik	41.3913	0.833752	0.488582	1.70647	0.0879202	0.19247
4933427I22Rik	0	NA	NA	NA	NA	NA
4933428C19Rik	0	NA	NA	NA	NA	NA
4933428G20Rik	17.8676	-0.413078	0.782592	-0.527834	0.597615	0.740456
4933429K18Rik	0	NA	NA	NA	NA	NA
4933429O19Rik	0	NA	NA	NA	NA	NA
4933430H16Rik	0.852295	-0.88331	3.21268	-0.274945	0.783359	NA
4933430I17Rik	16.6838	0.991951	0.744547	1.33229	0.182765	0.332288
4933430M04Rik	0	NA	NA	NA	NA	NA
4933430N04Rik	0	NA	NA	NA	NA	NA
4933431E20Rik	64.8351	-0.714345	0.441483	-1.61806	0.10565	0.220984
4933431G14Rik	1.23232	-0.267752	2.50236	-0.107	0.914789	NA
4933432G23Rik	0	NA	NA	NA	NA	NA
4933432I03Rik	0.144955	1.59004	4.56093	0.348623	0.727373	NA
4933432I09Rik	3.67638	-0.0772	1.58523	-0.0486995	0.961159	NA
4933432K03Rik	0.139432	0	4.56204	0	1	NA
4933433C11Rik	14.8414	0.00481293	0.822919	0.0058486	0.995334	0.997215
4933433F19Rik	0	NA	NA	NA	NA	NA
4933433G08Rik	0	NA	NA	NA	NA	NA
4933433G15Rik	5.5591	0.759569	1.25779	0.603894	0.545914	0.699114
4933433G19Rik	13.7083	0.983245	0.903339	1.08846	0.276394	0.446369
4933433H22Rik	0	NA	NA	NA	NA	NA
4933434E20Rik	1780.71	-0.162949	0.150108	-1.08554	0.277682	0.447583
4933436E23Rik	0	NA	NA	NA	NA	NA
4933436H12Rik	0	NA	NA	NA	NA	NA
4933436I01Rik	0	NA	NA	NA	NA	NA
4933438B17Rik	1.03037	2.22475	2.9012	0.766838	0.443178	NA
4933438K21Rik	1.40761	1.30024	2.42783	0.535558	0.592264	NA
4933439C10Rik	37.5702	-0.102566	0.520106	-0.197201	0.84367	0.910159
4933439K11Rik	0.132976	-0.808541	4.56204	-0.177232	0.859326	NA
4933440J02Rik	0.132976	-0.808541	4.56204	-0.177232	0.859326	NA
4933440M02Rik	0.852802	1.36551	3.3221	0.41104	0.681044	NA
5031410I06Rik	6.22292	-0.513172	1.14824	-0.446922	0.654932	0.784992
5031414D18Rik	29.1921	0.448898	0.627253	0.715656	0.474204	0.638509
5031425E22Rik	97.1852	0.498058	0.334665	1.48823	0.136691	0.268614
5031425F14Rik	0	NA	NA	NA	NA	NA
5031426D15Rik	1.25045	-0.597392	2.48217	-0.240673	0.809808	NA
5031434C07Rik	0	NA	NA	NA	NA	NA
5031434O11Rik	1.86555	-0.585677	2.38518	-0.245549	0.806032	NA
5031439G07Rik	1592.94	-0.416862	0.137307	-3.03599	0.00239748	0.00973989
5033403F01Rik	14.165	0.505525	0.765756	0.660164	0.509149	0.667978
5033403H07Rik	1.12175	1.17984	2.70711	0.435829	0.662961	NA
5033404E19Rik	0.137126	-0.808541	4.56204	-0.177232	0.859326	NA
5033406O09Rik	3.99753	-3.5254	2.02396	-1.74183	0.0815377	NA
5033428I22Rik	0	NA	NA	NA	NA	NA
5330411J11Rik	0	NA	NA	NA	NA	NA
5330413P13Rik	0.275612	0.648342	4.55936	0.1422	0.886922	NA
5330417C22Rik	22.9367	-0.155139	0.612526	-0.253277	0.800055	0.883693
5330426P16Rik	3.39073	0.144144	1.52689	0.0944033	0.924789	NA
5330434G04Rik	0	NA	NA	NA	NA	NA
5330439B14Rik	0	NA	NA	NA	NA	NA
5430401F13Rik	0.420566	1.63416	4.44654	0.367512	0.713237	NA
5430402E10Rik	0	NA	NA	NA	NA	NA
5430402O13Rik	26.1821	-0.586243	0.601298	-0.974962	0.329579	0.503122
5430403N17Rik	0	NA	NA	NA	NA	NA
5430405H02Rik	10.6382	-0.0109915	0.943657	-0.0116477	0.990707	0.994975
5430416N02Rik	50.896	-0.089837	0.470465	-0.190954	0.848562	0.91274
5430416O09Rik	13.8872	0.268964	0.904296	0.29743	0.766138	0.861898
5430419D17Rik	0.144955	1.59004	4.56093	0.348623	0.727373	NA
5430421F17Rik	0.137126	-0.808541	4.56204	-0.177232	0.859326	NA
5430421N21Rik	0.132976	-0.808541	4.56204	-0.177232	0.859326	NA
5430425K12Rik	0.149013	1.61011	4.55937	0.353143	0.723981	NA
5430427M07Rik	0.293658	-0.808522	4.56204	-0.177228	0.859329	NA
5430427O19Rik	0.137126	-0.808541	4.56204	-0.177232	0.859326	NA
5430428K19Rik	0	NA	NA	NA	NA	NA
5430431A17Rik	0.281988	0.648342	4.55936	0.1422	0.886922	NA
5430434I15Rik	0	NA	NA	NA	NA	NA
5430437J10Rik	0.137126	-0.808541	4.56204	-0.177232	0.859326	NA
5430440P10Rik	0.431001	1.65217	4.44509	0.371685	0.710127	NA
5530400C23Rik	0	NA	NA	NA	NA	NA
5530401A14Rik	0	NA	NA	NA	NA	NA
5530601H04Rik	161.591	-0.145692	0.260167	-0.559992	0.575485	0.722053
5730403I07Rik	87.5924	0.424828	0.320778	1.32437	0.185382	0.335883
5730405O15Rik	1.26012	-0.0228972	2.87007	-0.0079779	0.993635	NA
5730408K05Rik	3.18511	-0.851439	1.59321	-0.534419	0.593052	NA
5730409E04Rik	222.071	-1.62472	0.242633	-6.69621	2.13896e-11	4.67804e-10
5730412P04Rik	1.11602	-1.60645	2.7529	-0.583549	0.559524	NA
5730416F02Rik	2.54149	-2.42779	2.35526	-1.0308	0.302636	NA
5730420D15Rik	0.132976	-0.808541	4.56204	-0.177232	0.859326	NA
5730422E09Rik	2.41349	-0.676482	1.81311	-0.373107	0.709069	NA
5730435O14Rik	0	NA	NA	NA	NA	NA
5730455P16Rik	1003.01	0.161682	0.166464	0.971273	0.331413	0.504959
5730457N03Rik	0	NA	NA	NA	NA	NA
5730460C07Rik	0	NA	NA	NA	NA	NA
5730480H06Rik	4.05344	0.0918412	1.48298	0.0619301	0.950619	NA
5730488B01Rik	0	NA	NA	NA	NA	NA
5730507C01Rik	346.771	0.516928	0.246276	2.09898	0.0358186	0.0943596
5730508B09Rik	571.814	1.54207	0.200047	7.70855	1.27255e-14	4.37351e-13
5730522E02Rik	5.96062	-0.718239	1.19371	-0.601688	0.547382	0.70059
5730559C18Rik	15.43	-1.17378	0.886041	-1.32474	0.185257	0.335743
5830411N06Rik	0.28208	0.628264	4.56093	0.137749	0.890439	NA
5830415F09Rik	614.1	0.266892	0.162425	1.64317	0.100348	0.212684
5830416I19Rik	0	NA	NA	NA	NA	NA
5830416P10Rik	0	NA	NA	NA	NA	NA
5830417I10Rik	7709.37	0.396218	0.164092	2.4146	0.0157524	0.0482602
5830418P13Rik	0.578044	0.628541	3.98438	0.157751	0.874653	NA
5830428M24Rik	0.139432	0	4.56204	0	1	NA
5830432E09Rik	0.525606	-2.25488	4.47549	-0.503828	0.614382	NA
5830444B04Rik	0.144955	1.59004	4.56093	0.348623	0.727373	NA
5830454E08Rik	7.56112	-0.0875549	1.13426	-0.0771909	0.938472	0.967861
5830473C10Rik	0.139432	0	4.56204	0	1	NA
5930403L14Rik	76.977	-3.65903	0.495689	-7.38171	1.56268e-13	4.61138e-12
5930412G12Rik	2.64071	-1.14737	1.79574	-0.63894	0.522862	NA
5930430L01Rik	6.11477	-2.13068	1.30785	-1.62915	0.103282	0.217345
5930438M14Rik	0.275612	0.648342	4.55936	0.1422	0.886922	NA
6030407O03Rik	0	NA	NA	NA	NA	NA
6030408B16Rik	48.5627	-0.793181	0.554098	-1.43148	0.152292	0.290355
6030419C18Rik	12.1995	-1.09571	0.928149	-1.18053	0.237789	0.400994
6030440G07Rik	3.33138	0.232969	1.63345	0.142624	0.886587	NA
6030443J06Rik	20.1974	-0.386771	0.692717	-0.55834	0.576613	0.722879
6030458C11Rik	2772.1	0.185674	0.151359	1.22671	0.21993	0.381252
6030466F02Rik	0.417362	0.628277	4.56093	0.137752	0.890437	NA
6030468B19Rik	0.431001	1.65217	4.44509	0.371685	0.710127	NA
6030469F06Rik	0	NA	NA	NA	NA	NA
6030471H07Rik	0	NA	NA	NA	NA	NA
6030498E09Rik	1.39103	0.761172	2.62392	0.290089	0.771748	NA
6230400D17Rik	6.9232	0.880721	1.04915	0.839464	0.401209	0.572683
6330403A02Rik	1.54036	-0.278957	2.71053	-0.102916	0.91803	NA
6330403K07Rik	3.68682	-1.36742	1.7023	-0.803277	0.421815	NA
6330407A03Rik	0	NA	NA	NA	NA	NA
6330408A02Rik	495.233	0.599203	0.185214	3.23519	0.0012156	0.00546192
6330409D20Rik	1.08061	0.0134352	3.29191	0.00408127	0.996744	NA
6330410L21Rik	0.253198	-1.6507	4.52828	-0.364532	0.715461	NA
6330415B21Rik	0	NA	NA	NA	NA	NA
6330415G19Rik	23.2549	-0.144297	0.610323	-0.236427	0.813101	0.890797
6330416G13Rik	366.775	-0.051662	0.198636	-0.260084	0.794799	0.879914
6330418K02Rik	29.6184	-0.072741	0.53757	-0.135314	0.892363	0.940467
6330549D23Rik	272.033	0.138741	0.239111	0.580236	0.561756	0.71148
6430411K18Rik	0	NA	NA	NA	NA	NA
6430503K07Rik	0	NA	NA	NA	NA	NA
6430531B16Rik	3.36083	0.384333	1.75508	0.218983	0.826663	NA
6430548M08Rik	1115.48	1.57825	0.171425	9.20667	3.36386e-20	2.06695e-18
6430550D23Rik	13.5168	0.85322	0.790251	1.07968	0.280283	0.450548
6430562O15Rik	24.3423	-0.358563	0.607302	-0.59042	0.554909	0.706108
6430571L13Rik	32.6117	-1.84409	0.609078	-3.02767	0.00246445	0.00998586
6430573F11Rik	1.09332	-3.32483	3.4608	-0.96071	0.336698	NA
6430584L05Rik	0.878131	2.96728	3.56858	0.831502	0.40569	NA
6430706D22Rik	0	NA	NA	NA	NA	NA
6430710C18Rik	0.994622	-2.71605	3.00957	-0.902473	0.366806	NA
6530402F18Rik	1.38227	0.00738776	2.32948	0.00317142	0.99747	NA
6530403H02Rik	0	NA	NA	NA	NA	NA
6530411M01Rik	0.715479	2.21315	3.52726	0.627444	0.530369	NA
6720468P15Rik	5.3812	-0.741434	1.34379	-0.551746	0.581122	0.726863
6720483E21Rik	0.554475	0.648197	4.47053	0.144993	0.884716	NA
6720489N17Rik	40.1251	1.05278	0.562903	1.87027	0.0614465	0.145556
6820408C15Rik	160.4	0.796719	0.254899	3.12562	0.00177428	0.00754919
6820431F20Rik	4884.61	0.202781	0.17928	1.13109	0.258019	0.425259
7420426K07Rik	0.126599	-0.808541	4.56204	-0.177232	0.859326	NA
7420461P10Rik	0.271554	0.628264	4.56093	0.137749	0.890439	NA
7420700N18Rik	0.137126	-0.808541	4.56204	-0.177232	0.859326	NA
7420701I03Rik	0	NA	NA	NA	NA	NA
7530416G11Rik	0	NA	NA	NA	NA	NA
7630403G23Rik	0	NA	NA	NA	NA	NA
8030411F24Rik	50.827	1.7728	0.570357	3.10822	0.00188216	0.00792508
8030423F21Rik	1.38872	0.331586	2.57197	0.128923	0.897419	NA
8030423J24Rik	0	NA	NA	NA	NA	NA
8030442B05Rik	0	NA	NA	NA	NA	NA
8030443G20Rik	0.132976	-0.808541	4.56204	-0.177232	0.859326	NA
8030451O07Rik	0	NA	NA	NA	NA	NA
8030455M16Rik	1.30256	-0.851451	2.6727	-0.318573	0.75005	NA
8030462N17Rik	2567.8	0.682355	0.14049	4.85696	1.19205e-06	1.12052e-05
8430408G22Rik	0	NA	NA	NA	NA	NA
8430419L09Rik	783.898	0.220605	0.149641	1.47422	0.140422	0.274114
8430422H06Rik	0	NA	NA	NA	NA	NA
8430423G03Rik	0	NA	NA	NA	NA	NA
8430426J06Rik	0.69912	-1.68345	3.70084	-0.454882	0.649194	NA
8430429K09Rik	113.651	-0.497702	0.315212	-1.57894	0.114349	0.234717
8430430B14Rik	3.22508	-0.379544	1.55923	-0.243417	0.807682	NA
8430431K14Rik	0	NA	NA	NA	NA	NA
8430436N08Rik	0	NA	NA	NA	NA	NA
8430437L04Rik	0	NA	NA	NA	NA	NA
9030025P20Rik	440.762	0.338756	0.195075	1.73654	0.0824683	0.183223
9030204H09Rik	0	NA	NA	NA	NA	NA
9030404E10Rik	0.126599	-0.808541	4.56204	-0.177232	0.859326	NA
9030612E09Rik	4.42308	-0.334103	1.36132	-0.245425	0.806127	NA
9030617O03Rik	3.40902	-0.944966	1.64448	-0.574629	0.565542	NA
9030619P08Rik	0	NA	NA	NA	NA	NA
9030624G23Rik	496.048	0.36928	0.175515	2.10398	0.0353802	0.0934648
9030624J02Rik	3395.16	0.0850045	0.119899	0.708965	0.478346	0.642472
9030625G05Rik	1.11447	1.37518	3.08158	0.446259	0.65541	NA
9130008F23Rik	0.281988	0.648342	4.55936	0.1422	0.886922	NA
9130011E15Rik	933.762	-0.510891	0.16983	-3.00825	0.00262755	0.0105548
9130015A21Rik	0	NA	NA	NA	NA	NA
9130015L21Rik	0	NA	NA	NA	NA	NA
9130019O22Rik	197.808	0.626938	0.251371	2.49408	0.0126285	0.039993
9130019P16Rik	16.3497	0.0694345	0.731571	0.0949114	0.924385	0.959047
9130023H24Rik	190.229	1.05683	0.241438	4.37726	1.20181e-05	9.17123e-05
9130024F11Rik	5.94275	0.207176	1.20095	0.17251	0.863037	0.922234
9130204L05Rik	0	NA	NA	NA	NA	NA
9130209A04Rik	0	NA	NA	NA	NA	NA
9130221F21Rik	0.149013	1.61011	4.55937	0.353143	0.723981	NA
9130221H12Rik	240.708	0.239478	0.258376	0.926857	0.354001	0.52858
9130227L01Rik	0	NA	NA	NA	NA	NA
9130230L23Rik	0.298025	2.61395	4.44509	0.588053	0.556497	NA
9130401M01Rik	793.783	-0.265148	0.160399	-1.65305	0.0983199	0.209605
9130409I23Rik	0.702555	1.35018	3.50521	0.385191	0.700096	NA
9130409J20Rik	0	NA	NA	NA	NA	NA
9230009I02Rik	0	NA	NA	NA	NA	NA
9230102K24Rik	0.144955	1.59004	4.56093	0.348623	0.727373	NA
9230102O04Rik	0	NA	NA	NA	NA	NA
9230104L09Rik	1.24099	0.350075	2.63702	0.132754	0.894388	NA
9230105E05Rik	0	NA	NA	NA	NA	NA
9230110C19Rik	826.974	-0.291244	0.181618	-1.60361	0.1088	0.22604
9230110F15Rik	0	NA	NA	NA	NA	NA
9230112D13Rik	0	NA	NA	NA	NA	NA
9230112J17Rik	0.68194	-2.31062	4.09868	-0.563747	0.572927	NA
9230114K14Rik	111.246	1.70245	0.326642	5.21196	1.86858e-07	2.07208e-06
9230116L04Rik	2.74728	1.15834	1.6901	0.685365	0.493113	NA
9230116N13Rik	21.1405	-0.0632424	0.648984	-0.0974484	0.92237	0.958086
9230117E06Rik	0	NA	NA	NA	NA	NA
9330020H09Rik	17.3885	-0.086855	0.716709	-0.121186	0.903544	0.946505
9330102E08Rik	454.986	-0.238099	0.212126	-1.12244	0.261676	0.429242
9330111N05Rik	0.947025	-1.22804	3.33985	-0.367693	0.713102	NA
9330117O12Rik	0	NA	NA	NA	NA	NA
9330133O14Rik	60.3957	-0.284893	0.415722	-0.685297	0.493157	0.654247
9330136K24Rik	3.40414	-1.97009	1.81543	-1.08519	0.277836	NA
9330151L19Rik	77.5843	0.107991	0.37058	0.291411	0.770737	0.864946
9330158H04Rik	0.149013	1.61011	4.55937	0.353143	0.723981	NA
9330159F19Rik	1.82272	-0.0808159	1.95774	-0.0412801	0.967073	NA
9330159M07Rik	19.1961	-1.14164	0.682627	-1.67242	0.0944406	0.203351
9330162012Rik	7.89413	-0.373953	1.0951	-0.341479	0.732743	0.837315
9330162B11Rik	0	NA	NA	NA	NA	NA
9330175E14Rik	0	NA	NA	NA	NA	NA
9330175M20Rik	0	NA	NA	NA	NA	NA
9330178D15Rik	0	NA	NA	NA	NA	NA
9330179D12Rik	0.669028	-3.04321	4.4538	-0.683285	0.494427	NA
9330182L06Rik	160.875	-1.24203	0.299076	-4.15288	3.28312e-05	0.000224798
9330182O14Rik	0	NA	NA	NA	NA	NA
9330188P03Rik	0	NA	NA	NA	NA	NA
9330199G10Rik	0	NA	NA	NA	NA	NA
9430007A20Rik	0	NA	NA	NA	NA	NA
9430014N10Rik	0	NA	NA	NA	NA	NA
9430015G10Rik	684.289	0.173113	0.177722	0.974064	0.330025	0.503508
9430016H08Rik	465.62	-0.316071	0.197837	-1.59763	0.110126	0.228093
9430018G01Rik	7.39172	-1.62709	1.15141	-1.41312	0.157619	0.297982
9430019J16Rik	0	NA	NA	NA	NA	NA
9430020K01Rik	3403.01	0.441411	0.12704	3.47459	0.000511635	0.00256613
9430021M05Rik	0.821417	-0.258697	3.31164	-0.0781173	0.937735	NA
9430037G07Rik	27.937	-0.628763	0.561525	-1.11974	0.262824	0.430628
9430038I01Rik	105.541	0.554446	0.329167	1.68439	0.0921057	0.199626
9430041J12Rik	13.98	0.181555	0.808109	0.224666	0.822239	0.896282
9430060I03Rik	2.69522	-0.0356385	1.78618	-0.0199524	0.984081	NA
9430065F17Rik	4.5434	0.609549	1.35542	0.449712	0.652918	NA
9430069I07Rik	0	NA	NA	NA	NA	NA
9430076C15Rik	0.823413	-2.69184	3.17567	-0.847646	0.396635	NA
9430078K24Rik	2.60445	0.0178869	1.99993	0.00894373	0.992864	NA
9430083A17Rik	10.5004	1.01388	0.88156	1.1501	0.250103	0.415639
9430091E24Rik	103.24	0.867242	0.329577	2.63138	0.00850393	0.0288698
9530002B09Rik	7.52988	0.273128	1.11076	0.245892	0.805766	0.886317
9530003J23Rik	0.126599	-0.808541	4.56204	-0.177232	0.859326	NA
9530014B07Rik	0	NA	NA	NA	NA	NA
9530020I12Rik	0.289909	2.57774	4.44803	0.579524	0.562236	NA
9530026F06Rik	0.137126	-0.808541	4.56204	-0.177232	0.859326	NA
9530026P05Rik	0.67779	-2.29749	4.48496	-0.512265	0.608466	NA
9530027J09Rik	5.88085	1.2919	1.23807	1.04348	0.296724	0.468957
9530036O11Rik	0.420566	1.63416	4.44654	0.367512	0.713237	NA
9530051G07Rik	12.1367	-0.56179	0.872692	-0.643743	0.519742	0.677306
9530052E02Rik	0	NA	NA	NA	NA	NA
9530053A07Rik	1.80514	0.760468	2.12116	0.358515	0.719958	NA
9530059O14Rik	0	NA	NA	NA	NA	NA
9530062K07Rik	6.43486	-0.264789	1.22877	-0.215491	0.829384	0.900986
9530068E07Rik	4699.95	-0.479312	0.123699	-3.87483	0.0001067	0.000646116
9530077C05Rik	193.391	-0.0263231	0.229047	-0.114925	0.908505	0.949582
9530080O11Rik	13.6796	0.401011	0.811504	0.494157	0.621195	0.757625
9530082P21Rik	319.202	-1.03656	0.21895	-4.73425	2.19863e-06	1.93714e-05
9530091C08Rik	0.27793	0.628264	4.56093	0.137749	0.890439	NA
9630001P10Rik	3.18889	-0.465589	1.60967	-0.289244	0.772394	NA
9630013A20Rik	0	NA	NA	NA	NA	NA
9630013K17Rik	5.77956	-0.0976081	1.22997	-0.0793584	0.936748	0.966644
9630028B13Rik	0.785101	-3.27576	4.25253	-0.770308	0.441117	NA
9630028H03Rik	0.408587	-0.224819	4.52304	-0.0497052	0.960357	NA
9630028I04Rik	6.08526	-1.85931	1.41324	-1.31563	0.188297	0.339777
9830107B12Rik	0.263725	-1.70143	4.52415	-0.376076	0.70686	NA
9830132P13Rik	0	NA	NA	NA	NA	NA
9830147E19Rik	134.616	0.44646	0.290734	1.53563	0.12463	0.250292
9830166K06Rik	0.126599	-0.808541	4.56204	-0.177232	0.859326	NA
9930012K11Rik	6.59152	-0.470733	1.11738	-0.421281	0.67355	0.797096
9930014A18Rik	1.24931	-0.0219209	2.40495	-0.00911488	0.992727	NA
9930021J03Rik	3916.25	0.245955	0.171074	1.43771	0.150516	0.288118
9930104L06Rik	524.992	0.0152085	0.22866	0.0665116	0.946971	0.972105
9930111H07Rik	0.297808	-0.808522	4.56204	-0.177228	0.859329	NA
9930111J21Rik1	1.51623	-0.0733009	2.55388	-0.0287018	0.977102	NA
9930111J21Rik2	0.824866	-0.799602	3.54993	-0.225245	0.821789	NA
A130010J15Rik	401.49	0.478326	0.227111	2.10613	0.0351926	0.093108
A130077B15Rik	0.149013	1.61011	4.55937	0.353143	0.723981	NA
A1bg	0	NA	NA	NA	NA	NA
A1cf	0.132976	-0.808541	4.56204	-0.177232	0.859326	NA
A230001M10Rik	0.137126	-0.808541	4.56204	-0.177232	0.859326	NA
A230009B12Rik	0.982133	-1.70166	3.34227	-0.509133	0.610659	NA
A230020J21Rik	0.984543	1.17414	3.05889	0.383846	0.701093	NA
A230028O05Rik	0.694726	0.16982	3.54364	0.0479226	0.961778	NA
A230046K03Rik	1428.01	0.472388	0.190424	2.48072	0.0131117	0.0413298
A230050P20Rik	7.09275	-0.0758195	1.05803	-0.0716611	0.942872	0.970009
A230056J06Rik	1.72961	2.03011	2.41081	0.842086	0.39974	NA
A230056P14Rik	20.7111	0.278856	0.670019	0.416191	0.67727	0.7991
A230057D06Rik	0	NA	NA	NA	NA	NA
A230065H16Rik	7.70957	0.606704	1.08101	0.561239	0.574635	0.721599
A230070E04Rik	0.137126	-0.808541	4.56204	-0.177232	0.859326	NA
A230072C01Rik	32.2114	0.0798255	0.52918	0.150847	0.880096	0.933011
A230072E10Rik	3.28559	1.84533	1.89456	0.974014	0.33005	NA
A230077H06Rik	0.542588	-1.7014	4.47271	-0.380396	0.703651	NA
A230103J11Rik	109.977	0.109848	0.294838	0.37257	0.709468	0.821764
A230108P19Rik	3.79641	2.2221	1.49543	1.48593	0.137298	NA
A2m	1.91551	-2.74319	2.71801	-1.00926	0.312848	NA
A330009N23Rik	1.55653	1.54101	2.27502	0.67736	0.498178	NA
A330015K06Rik	0.271554	0.628264	4.56093	0.137749	0.890439	NA
A330023F24Rik	2.37465	0.736109	1.76852	0.41623	0.677242	NA
A330032B11Rik	0.866152	1.73109	3.63383	0.476383	0.633801	NA
A330033J07Rik	1.66909	0.156937	2.20938	0.0710325	0.943372	NA
A330035P11Rik	62.4736	-0.120805	0.403818	-0.299157	0.76482	0.860756
A330040F15Rik	0.126599	-0.808541	4.56204	-0.177232	0.859326	NA
A330041J22Rik	23.7735	-0.707999	0.620012	-1.14191	0.25349	0.420016
A330048O09Rik	0.144955	1.59004	4.56093	0.348623	0.727373	NA
A330049N07Rik	1.57545	2.01602	2.60888	0.772751	0.43967	NA
A330050F15Rik	0.281988	0.648342	4.55936	0.1422	0.886922	NA
A330069E16Rik	22.4297	0.731746	0.623096	1.17437	0.240246	0.403556
A330070K13Rik	0	NA	NA	NA	NA	NA
A330074K22Rik	0	NA	NA	NA	NA	NA
A330076C08Rik	1.10161	-0.859775	3.58157	-0.240055	0.810287	NA
A330076H08Rik	0	NA	NA	NA	NA	NA
A330093E20Rik	1.49886	0.5152	2.59718	0.198369	0.842756	NA
A330102I10Rik	1.56561	0.163325	2.3834	0.0685261	0.945367	NA
A3galt2	5.02802	-1.26386	1.26201	-1.00146	0.316604	0.489104
A430005L14Rik	690.412	0.662364	0.153184	4.32397	1.53247e-05	0.000113232
A430033K04Rik	732.924	-0.695417	0.202312	-3.43736	0.000587421	0.00289308
A430035B10Rik	6.65115	0.830993	1.1156	0.744882	0.456343	0.622397
A430046D13Rik	31.5384	0.791467	0.528867	1.49653	0.134515	0.265278
A430078G23Rik	9.46535	1.06629	1.0802	0.987118	0.323585	0.496644
A430078I02Rik	1.4538	3.802	2.87878	1.3207	0.186602	NA
A430085M09Rik	0	NA	NA	NA	NA	NA
A430088P11Rik	8.04206	-0.853226	1.02032	-0.836238	0.403021	0.574519
A430089I19Rik	0	NA	NA	NA	NA	NA
A430090L17Rik	0.137126	-0.808541	4.56204	-0.177232	0.859326	NA
A430093F15Rik	0.144955	1.59004	4.56093	0.348623	0.727373	NA
A430105I19Rik	47.3259	0.512493	0.504247	1.01635	0.309461	0.482259
A4galt	1.248	-3.04196	3.07971	-0.987743	0.323279	NA
A4gnt	0	NA	NA	NA	NA	NA
A530006G24Rik	0	NA	NA	NA	NA	NA
A530013C23Rik	0.309695	1.61014	4.55936	0.353151	0.723975	NA
A530016L24Rik	0.149013	1.61011	4.55937	0.353143	0.723981	NA
A530032D15Rik	12.7281	0.0369002	0.821298	0.0449291	0.964164	0.981271
A530046M15Rik	0	NA	NA	NA	NA	NA
A530050N04Rik	0	NA	NA	NA	NA	NA
A530053G22Rik	0	NA	NA	NA	NA	NA
A530058N18Rik	0	NA	NA	NA	NA	NA
A530064D06Rik	2.19539	-1.96283	2.16144	-0.908111	0.363819	NA
A530065N20Rik	0	NA	NA	NA	NA	NA
A530072M11Rik	13.9778	-0.453963	0.793861	-0.571842	0.567429	0.715787
A530088E08Rik	0	NA	NA	NA	NA	NA
A530099J19Rik	0.297808	-0.808522	4.56204	-0.177228	0.859329	NA
A630001G21Rik	9.31297	1.159	0.955029	1.21358	0.224909	0.386812
A630010A05Rik	0	NA	NA	NA	NA	NA
A630012P03Rik	0	NA	NA	NA	NA	NA
A630019I02Rik	0	NA	NA	NA	NA	NA
A630020A06	0.994931	0.141446	2.71889	0.0520233	0.95851	NA
A630023A22Rik	4.37032	-1.92703	1.52324	-1.26509	0.20584	NA
A630023P12Rik	0.132976	-0.808541	4.56204	-0.177232	0.859326	NA
A630033H20Rik	0.419114	-0.274754	4.51906	-0.0607988	0.951519	NA
A630066F11Rik	32.1292	0.519993	0.554702	0.937427	0.348539	0.523011
A630072M18Rik	83.3135	0.90902	0.368312	2.46807	0.0135843	0.0425801
A630073D07Rik	4.12454	1.58775	1.40184	1.13262	0.257375	NA
A630075F10Rik	0.139432	0	4.56204	0	1	NA
A630076J17Rik	0	NA	NA	NA	NA	NA
A630077J23Rik	1.09703	0.0202121	2.92822	0.00690251	0.994493	NA
A630089N07Rik	23.8316	0.821623	0.58538	1.40357	0.160446	0.301809
A630095E13Rik	0	NA	NA	NA	NA	NA
A630095N17Rik	0.271554	0.628264	4.56093	0.137749	0.890439	NA
A730004F24Rik	0	NA	NA	NA	NA	NA
A730006G06Rik	0.126599	-0.808541	4.56204	-0.177232	0.859326	NA
A730008H23Rik	14.0731	0.450854	0.91204	0.494336	0.621069	0.757597
A730017C20Rik	77.6029	0.194838	0.580311	0.335747	0.737061	0.840595
A730017L22Rik	22.8223	-0.455627	0.644812	-0.706605	0.479812	0.643706
A730018C14Rik	0	NA	NA	NA	NA	NA
A730020E08Rik	0	NA	NA	NA	NA	NA
A730020M07Rik	0.838307	0.156888	3.36001	0.0466928	0.962758	NA
A730036I17Rik	0	NA	NA	NA	NA	NA
A730043L09Rik	0	NA	NA	NA	NA	NA
A730046J19Rik	4.95508	0.852459	1.30522	0.653116	0.513681	NA
A730056A06Rik	8.09025	0.546707	1.08248	0.50505	0.613524	0.752548
A730082K24Rik	0	NA	NA	NA	NA	NA
A730085K08Rik	0.139432	0	4.56204	0	1	NA
A730090H04Rik	0.144955	1.59004	4.56093	0.348623	0.727373	NA
A730090N16Rik	0.525606	-2.25488	4.47549	-0.503828	0.614382	NA
A830009L08Rik	0.139432	0	4.56204	0	1	NA
A830010M20Rik	352.949	0.164947	0.226542	0.728108	0.466547	0.631465
A830011K09Rik	0.137126	-0.808541	4.56204	-0.177232	0.859326	NA
A830018L16Rik	0.293967	2.59594	4.44654	0.58381	0.559348	NA
A830019L24Rik	0.309695	1.61014	4.55936	0.353151	0.723975	NA
A830052D11Rik	1.40022	-0.5726	2.42588	-0.236038	0.813403	NA
A830080D01Rik	4064.02	0.341719	0.191631	1.78321	0.0745514	0.16939
A830082K12Rik	0.126599	-0.808541	4.56204	-0.177232	0.859326	NA
A830082N09Rik	16.5279	-0.151463	0.709222	-0.213562	0.830888	0.901585
A930001A20Rik	0	NA	NA	NA	NA	NA
A930001C03Rik	0	NA	NA	NA	NA	NA
A930002C04Rik	0.149013	1.61011	4.55937	0.353143	0.723981	NA
A930003A15Rik	0	NA	NA	NA	NA	NA
A930003O13Rik	0.433089	-0.80851	4.56204	-0.177226	0.859331	NA
A930004D18Rik	8.3472	0.385778	1.00487	0.383908	0.701046	0.815885
A930005H10Rik	18.8898	-0.358465	0.692676	-0.517507	0.604802	0.745835
A930006I01Rik	0	NA	NA	NA	NA	NA
A930006K02Rik	3.04553	-0.841107	1.62029	-0.519109	0.603685	NA
A930007I19Rik	1.14879	2.95973	2.96935	0.996761	0.31888	NA
A930009A15Rik	0	NA	NA	NA	NA	NA
A930011G23Rik	1.19169	-1.727	3.13336	-0.551167	0.581519	NA
A930012L18Rik	0.263725	-1.70143	4.52415	-0.376076	0.70686	NA
A930013F10Rik	84.8427	1.05199	0.334509	3.14488	0.00166156	0.00713591
A930015D03Rik	14.2036	-0.836286	0.882827	-0.947282	0.343495	0.517522
A930016O22Rik	0.564161	0.673636	4.40517	0.152919	0.878462	NA
A930017M01Rik	0.139432	0	4.56204	0	1	NA
A930018P22Rik	2.45835	3.04427	1.99357	1.52705	0.126749	NA
A930019D19Rik	0.729118	2.64345	3.83449	0.689388	0.490579	NA
A930024E05Rik	2.03554	-1.56545	2.02104	-0.774574	0.438591	NA
A930031H19Rik	0	NA	NA	NA	NA	NA
A930041C12Rik	24.5812	-0.482473	0.654758	-0.736873	0.4612	0.626543
AA387883	0	NA	NA	NA	NA	NA
AA388235	2.16926	-2.73643	2.42562	-1.12814	0.259261	NA
AA413626	3.90659	-0.0871897	1.48625	-0.0586641	0.95322	NA
AA414768	108.59	1.21138	0.521771	2.32167	0.020251	0.0595612
AA415398	55.8323	-0.161138	0.448074	-0.359624	0.719129	0.828125
AA465934	2.26177	0.70468	2.07033	0.340371	0.733577	NA
AA467197	25.9515	0.491767	0.573798	0.85704	0.391423	0.563989
AA474331	37.0303	-0.471011	0.516863	-0.911287	0.362144	0.535961
AA536875	0	NA	NA	NA	NA	NA
AA543186	8.91187	-0.415505	1.031	-0.403012	0.686939	0.806086
AA543401	0.137126	-0.808541	4.56204	-0.177232	0.859326	NA
AA545190	0	NA	NA	NA	NA	NA
AA619741	0.281988	0.648342	4.55936	0.1422	0.886922	NA
AA792892	0	NA	NA	NA	NA	NA
AA986860	16.7204	-0.100372	0.747196	-0.134332	0.89314	0.941006
AB124611	1.835	-0.282478	2.14127	-0.13192	0.895047	NA
AF067061	0	NA	NA	NA	NA	NA
AF067063	0.144955	1.59004	4.56093	0.348623	0.727373	NA
AF251705	1.09516	-3.5555	3.48298	-1.02082	0.307339	NA
AF357355	0	NA	NA	NA	NA	NA
AF357359	0	NA	NA	NA	NA	NA
AF357399	1.81796	-3.88172	2.48462	-1.5623	0.118218	NA
AF357425	0	NA	NA	NA	NA	NA
AF357426	0	NA	NA	NA	NA	NA
AF366264	3.40284	1.53852	1.48668	1.03487	0.30073	NA
AF529169	1.22535	-2.0764	2.79218	-0.743648	0.45709	NA
AI115009	0	NA	NA	NA	NA	NA
AI118078	197.395	-1.82674	0.291173	-6.27373	3.525e-10	6.31741e-09
AI182371	14.4387	2.871	0.898704	3.1946	0.00140024	0.00616855
AI197445	0	NA	NA	NA	NA	NA
AI314180	6424.8	-0.275491	0.131542	-2.09432	0.0362312	0.0952344
AI314278	0.701182	0.758272	3.6022	0.210503	0.833275	NA
AI317395	11.9832	-0.545841	0.85052	-0.641773	0.52102	0.678349
AI413582	188.11	0.129431	0.251547	0.51454	0.606874	0.747222
AI414108	183.116	0.0620304	0.268853	0.230722	0.817531	0.893713
AI427809	0.970674	-0.821465	3.0879	-0.266027	0.790218	NA
AI429214	8.5547	1.12436	1.03387	1.08753	0.276803	0.446876
AI450353	8.46824	0.801354	0.955537	0.838642	0.40167	0.573168
AI463170	0	NA	NA	NA	NA	NA
AI464131	22.3571	1.15737	0.67993	1.70219	0.08872	0.193857
AI467606	5.35844	-0.872081	1.40976	-0.618602	0.536178	0.690484
AI504432	33.6506	1.43848	0.521537	2.75815	0.00581291	0.0209678
AI506816	7.5573	-0.801425	1.05998	-0.756073	0.449606	0.616047
AI507597	2.15112	2.06908	1.95835	1.05654	0.290719	NA
AI593442	1.1128	-2.71587	2.91727	-0.930962	0.351873	NA
AI597479	1435.3	0.214233	0.181331	1.18144	0.237427	0.400575
AI606473	0	NA	NA	NA	NA	NA
AI607873	2.51552	-0.693641	2.51871	-0.275396	0.783012	NA
AI646519	0	NA	NA	NA	NA	NA
AI661453	107.926	-0.743821	0.35036	-2.12302	0.0337521	0.090052
AI662270	62.6215	-2.02529	0.465182	-4.35376	1.33822e-05	0.000100501
AI837181	885.502	0.02547	0.167873	0.151722	0.879406	0.932697
AI839979	1.12176	0.726915	2.60461	0.279088	0.780177	NA
AI846148	2278.86	-0.215397	0.136307	-1.58024	0.114052	0.234311
AI847159	0	NA	NA	NA	NA	NA
AI854517	496.429	0.203215	0.215809	0.941643	0.346376	0.520756
AI854703	30.0453	-1.56972	0.580222	-2.70538	0.00682262	0.0240001
AI987944	213.185	-0.233746	0.236869	-0.986813	0.323735	0.49682
AK010878	115.106	0.318892	0.332587	0.958824	0.337647	0.511262
AU015228	276.103	0.380848	0.213973	1.77988	0.0750949	0.170353
AU015791	0	NA	NA	NA	NA	NA
AU015836	1225.76	0.53148	0.511743	1.03857	0.299006	0.471198
AU016765	0	NA	NA	NA	NA	NA
AU018091	5.05675	0.515047	1.37179	0.375456	0.707321	0.82044
AU019823	2653.54	0.108817	0.128049	0.849812	0.39543	0.56742
AU019990	0	NA	NA	NA	NA	NA
AU021063	0	NA	NA	NA	NA	NA
AU021092	31.055	1.00916	0.670277	1.50559	0.132173	0.261838
AU022252	813.804	-0.841947	0.173563	-4.85095	1.22872e-06	1.15043e-05
AU022751	2645.57	-0.0559186	0.141985	-0.393836	0.693702	0.810738
AU022754	0.712989	1.33398	4.36623	0.305522	0.759969	NA
AU022793	0	NA	NA	NA	NA	NA
AU023762	0.390324	-2.26876	4.48651	-0.505685	0.613078	NA
AU040320	3782.23	0.332589	0.132472	2.51064	0.0120511	0.0384476
AU040972	0.265951	-1.71223	4.52329	-0.378537	0.705032	NA
AU041133	63.4651	0.583901	0.380799	1.53336	0.125188	0.251158
AV039307	4.02655	2.14333	1.42881	1.50009	0.133592	NA
AV051173	3.77905	-0.85567	1.47181	-0.581371	0.56099	NA
AV064505	0	NA	NA	NA	NA	NA
AV320801	6827.15	-0.560673	0.196749	-2.84968	0.00437626	0.0164373
AW011738	1.43139	2.75159	2.63529	1.04413	0.296426	NA
AW046200	3.59563	-1.48024	1.61124	-0.918698	0.358253	NA
AW112010	0.95988	-3.56285	4.4398	-0.802478	0.422276	NA
AW146154	156.865	0.083398	0.265329	0.314319	0.753279	0.851751
AW209491	491.289	-0.129895	0.172239	-0.754152	0.450758	0.617215
AW495222	5.07539	-1.34933	1.34642	-1.00216	0.316265	0.488791
AW549542	0	NA	NA	NA	NA	NA
AW549877	2537.78	0.846313	0.1875	4.51368	6.37125e-06	5.10924e-05
AW551984	0.971837	0.757359	3.01252	0.251404	0.801502	NA
AW554918	983.12	0.152025	0.160967	0.944452	0.344939	0.519146
AW822252	20.6586	1.19328	0.678852	1.75779	0.0787832	0.177331
AY074887	5.76111	-0.871989	1.26338	-0.690205	0.490066	0.651432
AY358078	350.729	0.353726	0.193348	1.82948	0.0673281	0.155974
AY512915	0	NA	NA	NA	NA	NA
AY512931	0	NA	NA	NA	NA	NA
AY702102	0	NA	NA	NA	NA	NA
AY702103	0	NA	NA	NA	NA	NA
AY761184	0	NA	NA	NA	NA	NA
AY761185	0	NA	NA	NA	NA	NA
Aaas	2874.03	-0.0599848	0.12825	-0.467717	0.639987	0.773236
Aacs	285.497	-1.09884	0.251731	-4.36516	1.27029e-05	9.60089e-05
Aadac	0	NA	NA	NA	NA	NA
Aadacl2	0	NA	NA	NA	NA	NA
Aadacl3	0	NA	NA	NA	NA	NA
Aadat	0.429341	2.57775	4.44803	0.579528	0.562233	NA
Aaed1	293.107	0.721154	0.20127	3.58302	0.000339642	0.00179762
Aagab	1950.28	-0.70744	0.134219	-5.27081	1.35826e-07	1.54903e-06
Aak1	2343.87	0.0338738	0.167185	0.202612	0.839438	0.90691
Aamdc	849.977	0.218609	0.152333	1.43507	0.151266	0.289078
Aamp	3776.83	0.197469	0.1171	1.68632	0.0917341	0.199155
Aanat	1.51171	0.480471	2.32651	0.20652	0.836385	NA
Aar2	1562.9	0.276185	0.149846	1.84313	0.0653103	0.152394
Aard	3662.26	0.456964	0.609774	0.749399	0.453617	0.620025
Aars	4067.38	0.240042	0.131184	1.82981	0.0672784	0.155894
Aars2	436.043	-0.705063	0.208156	-3.38719	0.000706123	0.00338949
Aarsd1	777.4	-0.072057	0.162815	-0.442569	0.658078	0.786964
Aasdh	380.606	-0.198923	0.201996	-0.984789	0.324728	0.49785
Aasdhppt	1250.5	0.283199	0.175004	1.61825	0.105609	0.220963
Aass	46.9557	0.16317	0.586588	0.278167	0.780884	0.871168
Aatf	1350.69	0.25486	0.145445	1.75228	0.0797259	0.178701
Aatk	7.69158	-0.729436	1.09981	-0.663239	0.507177	0.666316
Abat	655.989	0.935878	0.621968	1.5047	0.1324	0.262105
Abca1	1720.75	-0.567563	0.217115	-2.61412	0.00894588	0.0300753
Abca12	9.18055	0.399024	1.06202	0.375722	0.707124	0.820278
Abca13	1.50983	-1.10528	2.51179	-0.440038	0.65991	NA
Abca14	0	NA	NA	NA	NA	NA
Abca15	0.126599	-0.808541	4.56204	-0.177232	0.859326	NA
Abca16	41.1974	0.0867041	0.502319	0.172608	0.86296	0.922234
Abca17	141.455	-0.0033481	0.293864	-0.0113934	0.99091	0.994975
Abca2	14730.2	0.128673	0.157325	0.817879	0.413426	0.584479
Abca3	2375.24	-0.0993972	0.174629	-0.569191	0.569227	0.717295
Abca4	4.84402	1.2346	1.27358	0.969397	0.332347	NA
Abca5	2129.18	0.743496	0.170027	4.37281	1.22657e-05	9.3151e-05
Abca6	29.0828	1.53714	0.70111	2.19243	0.0283483	0.0785275
Abca7	511.556	-0.66568	0.181327	-3.67116	0.000241454	0.00132889
Abca8a	8.34642	0.395882	1.11793	0.354121	0.723248	0.830766
Abca8b	5.56052	-0.714874	1.2101	-0.590755	0.554685	0.706108
Abca9	3.02509	-0.0204352	1.91709	-0.0106595	0.991495	NA
Abcb10	629.817	-1.26228	0.169586	-7.44329	9.82106e-14	2.97864e-12
Abcb11	0.137126	-0.808541	4.56204	-0.177232	0.859326	NA
Abcb1a	4.81547	-0.842489	1.38123	-0.609957	0.54189	NA
Abcb1b	3.74619	0.067137	1.68885	0.039753	0.96829	NA
Abcb4	12.2203	0.0745837	0.813122	0.091725	0.926917	0.960831
Abcb5	0.44682	0.648375	4.55936	0.142207	0.886916	NA
Abcb6	2903.92	0.288826	0.148067	1.95064	0.0511	0.125422
Abcb7	1795.56	-0.142144	0.189729	-0.749196	0.453739	0.620032
Abcb8	698.963	-0.224843	0.152852	-1.47099	0.141295	0.275256
Abcb9	510.82	0.0521285	0.197239	0.264291	0.791556	0.877702
Abcc1	2531.68	-0.61608	0.134231	-4.5897	4.43884e-06	3.69097e-05
Abcc10	1239.64	-0.257383	0.171839	-1.49782	0.134181	0.264706
Abcc12	1.63036	-2.75435	2.74413	-1.00372	0.315512	NA
Abcc2	5.49145	3.12185	1.35826	2.29841	0.0215385	0.062647
Abcc3	2.44436	-2.44925	2.4366	-1.00519	0.314804	NA
Abcc4	1245.12	-0.8773	0.147338	-5.95432	2.61155e-09	4.01172e-08
Abcc5	2061.1	-0.152513	0.197033	-0.774049	0.438902	0.606849
Abcc6	2.92466	-1.07196	1.75433	-0.611036	0.541176	NA
Abcc8	38.0678	-1.26628	0.499275	-2.53623	0.0112054	0.0363291
Abcc9	5.86054	-2.26189	1.60745	-1.40713	0.159388	0.300326
Abcd1	624.48	0.694051	0.179369	3.86941	0.000109101	0.000658407
Abcd2	54.436	0.37612	0.563127	0.667913	0.504189	0.664043
Abcd3	3069.94	-0.488108	0.131431	-3.71379	0.000204179	0.00114234
Abcd4	14.0396	0.467279	0.798881	0.584916	0.558604	0.708817
Abce1	7242.8	-0.102507	0.167879	-0.610603	0.541462	0.69483
Abcf1	3267.34	-0.269807	0.146848	-1.83732	0.0661632	0.153954
Abcf2	5403.89	0.41512	0.122145	3.39858	0.000677368	0.00326693
Abcf3	2183.27	-0.291114	0.142182	-2.04747	0.0406117	0.104333
Abcg1	205.118	-1.09217	0.228513	-4.77949	1.75742e-06	1.58581e-05
Abcg2	713.642	0.420066	0.158416	2.65166	0.00800961	0.0274942
Abcg3	0.537976	-2.72786	4.46508	-0.610933	0.541244	NA
Abcg4	31.3834	-0.709407	0.570645	-1.24317	0.213806	0.373601
Abcg5	1.03414	-0.855605	3.32278	-0.257497	0.796795	NA
Abcg8	0	NA	NA	NA	NA	NA
Abhd1	2.58039	0.960824	1.90489	0.504399	0.613981	NA
Abhd10	812.735	-0.10314	0.146395	-0.704531	0.481102	0.644689
Abhd11	364.493	-0.706384	0.217596	-3.24631	0.0011691	0.00528479
Abhd11os	0.587625	1.63418	3.83869	0.425712	0.670317	NA
Abhd12	1911.94	0.98672	0.125219	7.87995	3.27512e-15	1.19197e-13
Abhd12b	0.132976	-0.808541	4.56204	-0.177232	0.859326	NA
Abhd13	952.673	0.118345	0.163395	0.72429	0.468888	0.633244
Abhd14a	233.743	-0.737264	0.233681	-3.155	0.00160498	0.00692856
Abhd14b	29.3302	-1.04586	0.574828	-1.81943	0.0688464	0.158895
Abhd15	12.2775	-0.101523	0.819427	-0.123895	0.901398	0.945462
Abhd16a	952.186	0.373244	0.146473	2.5482	0.0108279	0.0352827
Abhd16b	1.00067	2.06661	3.02819	0.682456	0.494951	NA
Abhd17a	1990.81	-0.622942	0.142595	-4.3686	1.25047e-05	9.46621e-05
Abhd17b	564.365	0.234997	0.195194	1.20392	0.228622	0.390843
Abhd17c	1593.52	-0.547246	0.143017	-3.82644	0.000130012	0.000771486
Abhd2	376.142	-1.39032	0.214836	-6.47155	9.7004e-11	1.90439e-09
Abhd3	82.241	0.260913	0.376432	0.693121	0.488233	0.649727
Abhd4	2281.63	0.291619	0.638761	0.456538	0.648003	0.779537
Abhd5	1638.93	-0.347496	0.138627	-2.50671	0.0121862	0.0387915
Abhd6	105.42	0.587669	0.390791	1.50379	0.132634	0.262325
Abhd8	306.308	0.136233	0.207636	0.656114	0.511751	0.670029
Abi1	3355.91	-0.261477	0.170064	-1.53752	0.124165	0.249724
Abi2	3285.01	0.242465	0.159933	1.51604	0.12951	0.257424
Abi3	48.4505	-0.834044	0.485159	-1.71912	0.0855933	0.188592
Abi3bp	13.6003	-0.774685	0.849328	-0.912115	0.361708	0.535632
Abl1	1917.61	0.557635	0.139944	3.9847	6.75649e-05	0.000430631
Abl2	5008.63	-0.101294	0.164206	-0.616873	0.537319	0.691451
Ablim1	15.2902	-1.18022	0.800668	-1.47405	0.140469	0.274114
Ablim2	42.1744	-1.73762	0.484156	-3.58897	0.000331986	0.00176289
Ablim3	19.5402	-0.36268	0.748441	-0.484581	0.627974	0.763204
Abo	16.9673	0.926649	0.712476	1.3006	0.193394	0.346639
Abr	2431.04	0.0900113	0.171594	0.524561	0.599888	0.742161
Abra	0	NA	NA	NA	NA	NA
Abracl	71.6152	0.659758	0.50623	1.30328	0.19248	0.345568
Abt1	1084.71	-0.0101057	0.151114	-0.0668744	0.946682	0.972036
Abtb1	508.906	0.00267938	0.226982	0.0118043	0.990582	0.994975
Abtb2	1260.57	0.584793	0.159618	3.6637	0.000248597	0.00136291
Acaa1a	614.354	-0.690997	0.163659	-4.22217	2.4196e-05	0.000170441
Acaa1b	411.673	-0.716703	0.188077	-3.8107	0.000138576	0.00081481
Acaa2	269.453	0.217771	0.376211	0.578854	0.562688	0.712216
Acaca	4955.25	1.23325	0.138326	8.91552	4.85527e-19	2.71322e-17
Acacb	90.4191	0.286663	0.339627	0.844052	0.39864	0.569987
Acad10	233.826	-0.81149	0.23787	-3.41148	0.00064611	0.00313964
Acad11	1725.45	-0.663008	0.171017	-3.87686	0.000105811	0.000642106
Acad12	339.725	-0.891925	0.212154	-4.20415	2.62066e-05	0.00018324
Acad8	307.676	0.042507	0.220782	0.19253	0.847327	0.912117
Acad9	1436.68	-0.15186	0.132672	-1.14463	0.252362	0.418521
Acadl	812.283	-0.552681	0.189867	-2.91089	0.00360405	0.0138484
Acadm	1811.76	-0.6993	0.140488	-4.97765	6.43594e-07	6.3927e-06
Acads	517.61	-0.335738	0.189175	-1.77475	0.0759389	0.171882
Acadsb	980.756	0.62625	0.152839	4.09744	4.17748e-05	0.000279562
Acadvl	2264.08	0.229296	0.129119	1.77584	0.0757589	0.171557
Acan	30.1584	0.0727887	0.610331	0.119261	0.905069	0.947315
Acap1	11.5493	0.529613	0.864317	0.612754	0.540039	0.693724
Acap2	1000.04	-0.378656	0.181129	-2.09053	0.0365703	0.0958771
Acap3	634.529	-0.0918917	0.176661	-0.520157	0.602954	0.744397
Acat1	1433.36	-0.617975	0.140043	-4.41277	1.02058e-05	7.89432e-05
Acat2	3081.23	1.84762	0.146703	12.5943	2.27038e-36	5.46201e-34
Acat3	662.385	2.70357	0.216155	12.5075	6.7915e-36	1.50623e-33
Acbd3	3781.77	0.284259	0.126641	2.24461	0.0247929	0.0702275
Acbd4	154.165	0.330796	0.265304	1.24686	0.21245	0.371918
Acbd5	960.477	-0.169096	0.17573	-0.962247	0.335926	0.509513
Acbd6	1876.35	-0.194779	0.164051	-1.1873	0.235108	0.398264
Acbd7	4.10271	-0.126615	1.45937	-0.0867603	0.930862	NA
Accs	104.459	0.172903	0.318628	0.542649	0.587371	0.731971
Accsl	6.69635	-0.446669	1.10216	-0.405265	0.685283	0.805157
Acd	999.775	-0.0536478	0.15064	-0.356133	0.721741	0.829707
Ace	514.982	-0.59252	0.188448	-3.14421	0.00166537	0.0071493
Ace2	1.09937	-0.201281	3.59712	-0.055956	0.955377	NA
Ace3	0.160682	0	4.56204	0	1	NA
Acer1	0.829246	0.751558	3.27217	0.229681	0.818339	NA
Acer2	479.461	0.0876557	0.170505	0.514096	0.607185	0.747475
Acer3	1987.53	1.85323	0.165727	11.1824	4.97093e-29	7.127e-27
Ache	2.72429	-0.244139	1.7314	-0.141007	0.887864	NA
Acin1	5219.92	-0.204886	0.16821	-1.21804	0.22321	0.384963
Ackr1	9.28325	-2.28178	1.24325	-1.83533	0.0664566	0.154384
Ackr2	3.31692	-0.144813	1.49789	-0.0966781	0.922982	NA
Ackr3	101.259	1.14482	0.490608	2.33348	0.019623	0.0580753
Ackr4	6.90019	-0.517539	1.06413	-0.486349	0.62672	0.762463
Acly	5522.87	-0.55064	0.112461	-4.89628	9.76678e-07	9.34162e-06
Acmsd	0	NA	NA	NA	NA	NA
Acnat1	0.702337	-0.852506	3.36926	-0.253024	0.800249	NA
Acnat2	0	NA	NA	NA	NA	NA
Aco1	796.599	-0.622459	0.183615	-3.39002	0.000698877	0.00335697
Aco2	6435.94	0.215176	0.124649	1.72626	0.0842999	0.186553
Acot1	155.925	0.0484404	0.347278	0.139486	0.889066	0.938595
Acot10	409.474	-0.226169	0.185715	-1.21783	0.22329	0.384971
Acot11	25.0182	-2.05893	0.652512	-3.15538	0.00160287	0.00692154
Acot12	0.549484	0.742746	4.34095	0.171102	0.864143	NA
Acot13	128.193	0.139636	0.310288	0.450019	0.652697	0.783523
Acot2	179.32	-0.896388	0.272057	-3.29485	0.000984735	0.00455733
Acot3	18.7436	0.109571	0.695706	0.157496	0.874854	0.929467
Acot4	12.5268	0.683378	0.837316	0.816153	0.414412	0.584984
Acot5	33.9053	0.294072	0.537991	0.54661	0.584647	0.729842
Acot6	21.5468	0.326822	0.693395	0.471337	0.6374	0.771424
Acot7	2403.72	0.59467	0.152977	3.88731	0.000101361	0.000618559
Acot8	212.589	0.305873	0.224659	1.3615	0.173355	0.320391
Acot9	949.653	-0.315433	0.141829	-2.22403	0.0261462	0.0734744
Acox1	1190.8	-0.23583	0.149549	-1.57695	0.114808	0.235523
Acox2	0.731115	1.6512	3.59065	0.459861	0.645616	NA
Acox3	95.4725	0.287279	0.313383	0.916701	0.359299	0.533741
Acoxl	13.4509	0.471199	0.811325	0.580777	0.561391	0.711208
Acp1	2079.72	-0.0281656	0.125989	-0.223556	0.823103	0.896701
Acp2	780.845	-0.374768	0.153838	-2.43612	0.0148458	0.0459412
Acp5	550.985	0.0138265	0.200377	0.0690023	0.944988	0.971205
Acp6	553.58	-0.243405	0.169242	-1.43821	0.150376	0.288008
Acpp	68.5936	-0.770289	0.461728	-1.66827	0.0952615	0.204746
Acpt	1.99187	1.55496	2.30447	0.674757	0.49983	NA
Acr	0.144955	1.59004	4.56093	0.348623	0.727373	NA
Acrbp	135.384	-0.154688	0.32951	-0.469449	0.638748	0.772325
Acrv1	0.293658	-0.808522	4.56204	-0.177228	0.859329	NA
Acsbg1	1027.18	0.323215	0.558197	0.579035	0.562566	0.712125
Acsbg2	6.11993	-1.84646	1.3681	-1.34965	0.177128	0.324785
Acsf2	482.69	-0.0814128	0.171538	-0.474604	0.635069	0.76954
Acsf3	251.156	0.477442	0.231467	2.06268	0.0391427	0.101145
Acsl1	4047.55	0.407399	0.119157	3.41902	0.000628475	0.00306815
Acsl3	1855.66	0.140194	0.187033	0.749569	0.453514	0.619973
Acsl4	1350.8	-0.21051	0.218239	-0.964586	0.334752	0.508342
Acsl5	27.2836	0.364115	0.617198	0.589949	0.555225	0.706234
Acsl6	228.66	0.590202	0.29085	2.02923	0.0424345	0.108006
Acsm1	0	NA	NA	NA	NA	NA
Acsm2	0.575956	2.22528	4.21436	0.528024	0.597482	NA
[truncated: 22,422 more rows]
